# Supplementary material for: Comparative Transcriptomic Analysis Identifies a Range of Immunologically Related Functional Elaborations of Lymph Node Associated Lymphatic and Blood Endothelial Cells
Source: Front Immunol. 2019 Apr 16;10:816. doi: 10.3389/fimmu.2019.00816 (PMC6478037; doi:10.3389/fimmu.2019.00816)
Supplement: Supplementary file 1 [file Table_1.xlsx]

## Sheet: Table S1
Table S1. List of genes with average FPKM of 1 or greater in at least 1 cell type in LN-LEC, LN-BEC, or D-LEC.
Gene	Description	AVERAGE LN-LEC	AVERAGE LN-BEC	AVERAGE D-LEC
MARCH1	membrane-associated ring finger (C3HC4) 1	28.8469	90.8488	26.6355
MARCH2	membrane-associated ring finger (C3HC4) 2	2786.58	2799.15	3021.45
MARCH3	membrane-associated ring finger (C3HC4) 3	142.799	193.101	231.35
MARCH4	membrane-associated ring finger (C3HC4) 4	1.37522	115.71	0.274288
MARCH5	membrane-associated ring finger (C3HC4) 5	2582.32	2736.67	2253.76
MARCH6	membrane-associated ring finger (C3HC4) 6	1700.81	1968.96	1694.9
MARCH7	membrane-associated ring finger (C3HC4) 7	731.277	763.996	701.787
MARCH8	membrane-associated ring finger (C3HC4) 8	2444.92	2234.96	2095.93
MARCH9	membrane-associated ring finger (C3HC4) 9	81.1247	44.0966	44.3719
MARCH10	membrane-associated ring finger (C3HC4) 10	0.279371	0	1.90943
MARCH11	membrane-associated ring finger (C3HC4) 11	2.66938	0	0.752925
SEPT1	septin 1	163.054	61.7129	58.2247
SEPT2	septin 2	18749.4	17286.5	22366.7
SEPT3	septin 3	2.05878	1.06766	1.4308
SEPT4	septin 4	988.84	2502.53	3063.3
SEPT5	septin 5	16.6914	3.61315	23.8303
SEPT6	septin 6	2130.24	519.849	4510.07
SEPT7	septin 7	9181.73	8155.91	10899.4
SEPT8	septin 8	1217.71	932.998	1457.48
SEPT9	septin 9	1341.38	1184.21	3030.04
SEPT10	septin 10	2850.5	2300.49	1587.27
SEPT11	septin 11	10404.8	10772.6	9441.05
SEPT12	septin 12	0.599911	1.36162	2.21001
SEPT15	selenoprotein	8644.05	9030.13	12064.2
A1bg	alpha-1-B glycoprotein	0	6.39686	0
A1cf	APOBEC1 complementation factor	0.155189	0.888988	1.11285
A2ld1	AIG2-Like Domain-Containing Protein 1	140.27	164.923	204.504
A2m	alpha-2-macroglobulin	448.058	19.1188	2.76537
A3galt2	alpha 1,3-galactosyltransferase 2 (isoglobotriaosylceramide synthase)	29.8601	55.6275	57.0118
A4galt	alpha 1,4-galactosyltransferase	1406.77	1729.52	1111.89
A4gnt	alpha-1,4-N-acetylglucosaminyltransferase	0	2.13531	0
Aaas	achalasia, adrenocortical insufficiency, alacrimia	269.799	361.588	391.181
Aacs	acetoacetyl-CoA synthetase	468.539	231.956	233.493
Aadac	arylacetamide deacetylase (esterase)	0.155189	0	1.75386
Aagab	alpha- and gamma-adaptin binding protein	447.996	391.943	522.704
Aak1	AP2 associated kinase 1	2759.93	3389.21	4520.81
Aamp	angio-associated migratory protein	1286.4	1195.78	1287.71
Aanat	arylalkylamine N-acetyltransferase	12.0599	8.62857	2.55044
Aard	alanine and arginine rich domain containing protein	7.94088	5.27346	4.30809
Aars	alanyl-tRNA synthetase	694.091	602.592	596.51
Aars2	alanyl-tRNA synthetase 2, mitochondrial (putative)	476.423	378.621	374.741
Aarsd1	alanyl-tRNA synthetase domain containing 1	141.448	114.41	168.54
Aasdh	aminoadipate-semialdehyde dehydrogenase	617.201	619.179	755.353
Aasdhppt	aminoadipate-semialdehyde dehydrogenase-phosphopantetheinyl transferase	1056.84	1167.62	1363.65
Aass	aminoadipate-semialdehyde synthase	16.8552	76.623	1.50585
Aatf	apoptosis antagonizing transcription factor	175.088	198.437	180.428
Aatk	apoptosis-associated tyrosine kinase	304.684	74.5597	517.621
Abat	4-aminobutyrate aminotransferase	94.8138	106.601	520.87
Abca1	ATP-binding cassette, sub-family A (ABC1), member 1	10310.3	10306.6	7471.33
Abca12	ATP-binding cassette, sub-family A (ABC1), member 12	1.41702	0.296329	0
Abca13	ATP-binding cassette, sub-family A (ABC1), member 13	994.685	30.343	2.32872
Abca17	ATP-binding cassette, sub-family A (ABC1), member 17	12.2392	6.55281	2.24308
Abca2	ATP-binding cassette, sub-family A (ABC1), member 2	710.352	1489.61	330.016
Abca3	ATP-binding cassette, sub-family A (ABC1), member 3	567.915	747.136	333.465
Abca4	ATP-binding cassette, sub-family A (ABC1), member 4	19.1126	41.3248	73.4082
Abca5	ATP-binding cassette, sub-family A (ABC1), member 5	101.241	228.425	924.776
Abca6	ATP-binding cassette, sub-family A (ABC1), member 6	11.7983	6.73621	16.8005
Abca7	ATP-binding cassette, sub-family A (ABC1), member 7	226.494	405.246	252.472
Abca8a	ATP-binding cassette, sub-family A (ABC1), member 8a	117.925	157.132	209.091
Abca8b	ATP-binding cassette, sub-family A (ABC1), member 8b	11.5771	94.5566	108.811
Abca9	ATP-binding cassette, sub-family A (ABC1), member 9	34.7161	45.7863	43.5312
Abcb10	ATP-binding cassette, sub-family B (MDR/TAP), member 10	1788.08	1347.94	2523.79
Abcb11	ATP-binding cassette, sub-family B (MDR/TAP), member 11	0	0.649852	4.01263
Abcb1a	ATP-binding cassette, sub-family B (MDR/TAP), member 1A	53.8419	6259.84	68.2436
Abcb1b	ATP-binding cassette, sub-family B (MDR/TAP), member 1B	80.1639	558.32	111.456
Abcb4	ATP-binding cassette, sub-family B (MDR/TAP), member 4	17.9744	54.3256	43.4719
Abcb6	ATP-binding cassette, sub-family B (MDR/TAP), member 6	371.51	298.495	374.067
Abcb7	ATP-binding cassette, sub-family B (MDR/TAP), member 7	3352.19	3609.4	2267.87
Abcb8	ATP-binding cassette, sub-family B (MDR/TAP), member 8	292.389	217.744	370.99
Abcb9	ATP-binding cassette, sub-family B (MDR/TAP), member 9	77.6112	59.4789	76.4914
Abcc1	ATP-binding cassette, sub-family C (CFTR/MRP), member 1	2001.78	1576.89	1085.02
Abcc10	ATP-binding cassette, sub-family C (CFTR/MRP), member 10	75.7752	74.2686	55.8752
Abcc12	ATP-binding cassette, sub-family C (CFTR/MRP), member 12	11.3668	41.4689	0
Abcc2	ATP-binding cassette, sub-family C (CFTR/MRP), member 2	18.2575	10.1031	20.2695
Abcc3	ATP-binding cassette, sub-family C (CFTR/MRP), member 3	17.6811	104.623	9.34794
Abcc4	ATP-binding cassette, sub-family C (CFTR/MRP), member 4	160.757	1253.17	400.403
Abcc5	ATP-binding cassette, sub-family C (CFTR/MRP), member 5	3322.07	1671.13	3388.49
Abcc6	ATP-binding cassette, sub-family C (CFTR/MRP), member 6	1.43735	0.587934	4.19449
Abcc8	ATP-binding cassette, sub-family C (CFTR/MRP), member 8	0	4.85238	0
Abcc9	ATP-binding cassette, sub-family C (CFTR/MRP), member 9	797.956	1164.4	932.234
Abcd1	ATP-binding cassette, sub-family D (ALD), member 1	514.341	658.131	468.21
Abcd2	ATP-binding cassette, sub-family D (ALD), member 2	143.253	24.4547	202.003
Abcd3	ATP-binding cassette, sub-family D (ALD), member 3	1708.07	1603.99	1608.66
Abcd4	ATP-binding cassette, sub-family D (ALD), member 4	219.857	240.362	217.153
Abce1	ATP-binding cassette, sub-family E (OABP), member 1	6527.21	6142.69	6666.59
Abcf1	ATP-binding cassette, sub-family F (GCN20), member 1	1519.57	1692.9	1598.97
Abcf2	ATP-binding cassette, sub-family F (GCN20), member 2	525.981	575.915	572.795
Abcf3	ATP-binding cassette, sub-family F (GCN20), member 3	806.931	976.379	936
Abcg1	ATP-binding cassette, sub-family G (WHITE), member 1	1030.95	5288.73	4830.28
Abcg2	ATP-binding cassette, sub-family G (WHITE), member 2	1940.49	13810.9	6499.7
Abcg3	ATP-binding cassette, sub-family G (WHITE), member 3	106.224	86.1506	10.0432
Abcg4	ATP-binding cassette, sub-family G (WHITE), member 4	3.38898	1.47456	2.54365
Abcg8	ATP-binding cassette, sub-family G (WHITE), member 8	2.8367	3.06823	2.02814
Abhd1	abhydrolase domain containing 1	0.279371	1.59603	0.967858
Abhd10	abhydrolase domain containing 10	854.92	674.641	833.951
Abhd11	abhydrolase domain containing 11	515.876	591.198	518.576
Abhd12	abhydrolase domain containing 12	870.211	668.635	1284.62
Abhd13	abhydrolase domain containing 13	1713.17	1639.15	1534.13
Abhd14a	abhydrolase domain containing 14A	408.842	351.079	758.886
Abhd14b	abhydrolase domain containing 14b	653.876	702.081	804.942
Abhd15	abhydrolase domain containing 15	9.80221	25.1565	17.1375
Abhd16a	abhydrolase domain containing 16A	2092.17	1917.52	2238.55
Abhd16b	abhydrolase domain containing 16B	3.60067	0.888988	0
Abhd2	abhydrolase domain containing 2	184.865	115.997	66.9892
Abhd3	abhydrolase domain containing 3	33.1446	23.1701	22.3278
Abhd4	abhydrolase domain containing 4	1168.59	960.027	1539.2
Abhd5	abhydrolase domain containing 5	1201.47	1076	1635.61
Abhd6	abhydrolase domain containing 6	592.273	452.869	805.526
Abhd8	abhydrolase domain containing 8	458.84	166.482	154.048
Abi1	abl-interactor 1	2094.44	2389.8	2582.98
Abi2	abl-interactor 2	2637.26	2768.52	4091.43
Abi3	ABI gene family, member 3	769.299	1324.84	737.104
Abi3bp	ABI gene family, member 3 (NESH) binding protein	613.891	292.754	12489.2
Abl1	c-abl oncogene 1, non-receptor tyrosine kinase	1410.4	1612.21	2615.9
Abl2	v-abl Abelson murine leukemia viral oncogene 2 (arg, Abelson-related gene)	1238.36	1614.21	1275.95
Ablim1	actin-binding LIM protein 1	12023.3	31427.7	2712.06
Ablim2	actin-binding LIM protein 2	1065.1	74.6569	2864.37
Ablim3	actin binding LIM protein family, member 3	2242.57	3718.97	5024.12
Abo	ABO blood group (transferase A, alpha 1-3-N-acetylgalactosaminyltransferase, transferase B, alpha 1-3-galactosyltransferase)	0.934308	1.42354	0
Abp1	NA	2.79606	4.19635	0
Abpa	NA	1627.03	6522.86	10.1658
Abpb	NA	2227.66	7490.02	14.9614
Abpg	NA	99.945	286.843	0.419282
Abr	active BCR-related gene	496.624	972.788	436.202
Abra	actin-binding Rho activating protein	71.9204	106.961	72.0019
Abt1	activator of basal transcription 1	396.771	436.868	610.602
Abtb1	ankyrin repeat and BTB (POZ) domain containing 1	324.029	493.451	446.302
Abtb2	ankyrin repeat and BTB (POZ) domain containing 2	273.264	51.0608	12.1553
Acaa1a	acetyl-Coenzyme A acyltransferase 1A	1513.82	1523.56	1540.47
Acaa1b	acetyl-Coenzyme A acyltransferase 1B	32.1192	29.4584	19.2656
Acaa2	acetyl-Coenzyme A acyltransferase 2 (mitochondrial 3-oxoacyl-Coenzyme A thiolase)	1445.91	1531.72	2198.3
Acaca	acetyl-Coenzyme A carboxylase alpha	340.484	320.155	477.016
Acacb	acetyl-Coenzyme A carboxylase beta	689.599	1210.93	175.687
Acad10	acyl-Coenzyme A dehydrogenase family, member 10	128.017	183.984	144.754
Acad11	acyl-Coenzyme A dehydrogenase family, member 11	561.939	244.217	142.107
Acad12	acyl-Coenzyme A dehydrogenase family, member 12	48.8321	77.4414	86.4597
Acad8	acyl-Coenzyme A dehydrogenase family, member 8	617.95	781.414	839.797
Acad9	acyl-Coenzyme A dehydrogenase family, member 9	623.241	555.733	653.083
Acadl	acyl-Coenzyme A dehydrogenase, long-chain	3830.65	2550.79	2575.39
Acadm	acyl-Coenzyme A dehydrogenase, medium chain	1046.21	975.767	1509.5
Acads	acyl-Coenzyme A dehydrogenase, short chain	131.767	112.531	59.0353
Acadsb	acyl-Coenzyme A dehydrogenase, short/branched chain	1280.84	1317.25	1567.59
Acadvl	acyl-Coenzyme A dehydrogenase, very long chain	849.559	945.376	1234.68
Acan	aggrecan	0	16.5931	0.419282
Acap1	ArfGAP with coiled-coil, ankyrin repeat and PH domains 1	150.01	304.151	245.005
Acap2	ArfGAP with coiled-coil, ankyrin repeat and PH domains 2	6995.82	6259.66	6552.82
Acap3	ArfGAP with coiled-coil, ankyrin repeat and PH domains 3	270.454	383.937	396.94
Acat1	acetyl-Coenzyme A acetyltransferase 1	1832.25	2038.71	2160.38
Acat2	acetyl-Coenzyme A acetyltransferase 2	1213.34	1101.61	958.941
Acat3	acetyl-Coenzyme A acetyltransferase 3	24.8013	14.8898	24.5133
Acbd3	acyl-Coenzyme A binding domain containing 3	1175.28	1245.1	1064.51
Acbd4	acyl-Coenzyme A binding domain containing 4	376.576	367.489	455.956
Acbd5	acyl-Coenzyme A binding domain containing 5	1412.76	1753.01	1219.79
Acbd6	acyl-Coenzyme A binding domain containing 6	972.367	806.417	992.96
Acbd7	acyl-Coenzyme A binding domain containing 7	0.748113	1.18295	1.90943
Accn1	NA	3.90005	0.592659	9.88805
Accn2	NA	176.022	79.2835	54.257
Accn3	NA	2.49202	6.13646	5.39466
Accn5	NA	0.468741	1.06766	2.96972
Accs	1-aminocyclopropane-1-carboxylate synthase (non-functional)	100.731	138.178	51.9113
Accsl	1-aminocyclopropane-1-carboxylate synthase (non-functional)-like	1.41702	0.592659	0
Acd	adrenocortical dysplasia	871.698	813.46	1165.58
Ace	angiotensin I converting enzyme (peptidyl-dipeptidase A) 1	106.359	3043.44	459.88
Ace2	angiotensin I converting enzyme (peptidyl-dipeptidase A) 2	6.29524	2.53985	15.6477
Acer2	alkaline ceramidase 2	1585.11	1250.36	1574.61
Acer3	alkaline ceramidase 3	2556.93	1615.42	1465.04
Ache	acetylcholinesterase	491.629	34.6169	14.2203
Acin1	apoptotic chromatin condensation inducer 1	2236.44	2528.51	2831.14
Acly	ATP citrate lyase	12116.8	11419.6	19817.9
Acmsd	amino carboxymuconate semialdehyde decarboxylase	2.44387	7.14784	2.81794
Acn9	ACN9 homolog (S. cerevisiae)	142.582	126.744	118.118
Acnat1	acyl-coenzyme A amino acid N-acyltransferase 1	7.81978	22.9878	3.05536
Aco1	aconitase 1	2289.47	1372.15	1763.74
Aco2	aconitase 2, mitochondrial	2415.16	2497.07	3082.7
Acot1	acyl-CoA thioesterase 1	20.1308	62.3841	2.12437
Acot10	acyl-CoA thioesterase 10	115.426	141.255	168.467
Acot11	acyl-CoA thioesterase 11	15.9903	93.7563	18.8693
Acot12	acyl-CoA thioesterase 12	1.86111	0.355885	16.6558
Acot13	acyl-CoA thioesterase 13	875.83	838.598	784.713
Acot2	acyl-CoA thioesterase 2	962.235	1010.8	1616.48
Acot6	acyl-CoA thioesterase 6	4.69663	1.89236	15.7435
Acot7	acyl-CoA thioesterase 7	1654.76	661.71	1894
Acot8	acyl-CoA thioesterase 8	294.106	317.424	290.454
Acot9	acyl-CoA thioesterase 9	947.93	1030.82	1442.12
Acox1	acyl-Coenzyme A oxidase 1, palmitoyl	10221.6	11220	6873.59
Acox2	acyl-Coenzyme A oxidase 2, branched chain	0.558743	1.48165	1.70509
Acox3	acyl-Coenzyme A oxidase 3, pristanoyl	2541.13	2159.15	1735.79
Acoxl	acyl-Coenzyme A oxidase-like	0.900128	7.14692	1.80642
Acp1	acid phosphatase 1, soluble	1266.72	1203.5	1324.81
Acp2	acid phosphatase 2, lysosomal	2040.61	1324.95	2314.13
Acp5	acid phosphatase 5, tartrate resistant	75.2609	43.6458	67.2333
Acp6	acid phosphatase 6, lysophosphatidic	526.206	212.583	402.953
Acpl2	acid phosphatase-like 2	23.6207	34.1804	1.33457
Acpp	acid phosphatase, prostate	15.2345	104.709	0.667287
Acpt	acid phosphatase, testicular	1.41004	7.44325	3.41017
Acr	acrosin prepropeptide	146.627	237.986	319.678
Acrbp	proacrosin binding protein	298.881	452.946	450.351
Acsbg1	acyl-CoA synthetase bubblegum family member 1	0.475729	3.60515	9.45307
Acsbg2	acyl-CoA synthetase bubblegum family member 2	2.77906	1.24487	4.48448
Acsf2	acyl-CoA synthetase family member 2	135.893	109.283	359.373
Acsf3	acyl-CoA synthetase family member 3	247.948	240.864	249.819
Acsl1	acyl-CoA synthetase long-chain family member 1	432.412	293.463	308.53
Acsl3	acyl-CoA synthetase long-chain family member 3	853.608	347.157	317.435
Acsl4	acyl-CoA synthetase long-chain family member 4	5415.64	10325.1	5514.91
Acsl5	acyl-CoA synthetase long-chain family member 5	2295.83	2076.44	2839.97
Acsl6	acyl-CoA synthetase long-chain family member 6	19.683	3.13724	0.274288
Acsm3	acyl-CoA synthetase medium-chain family member 3	7.1195	9.70567	10.7893
Acsm4	acyl-CoA synthetase medium-chain family member 4	0.620757	0.71177	2.37237
Acsm5	acyl-CoA synthetase medium-chain family member 5	10.6257	1.71751	0
Acss1	acyl-CoA synthetase short-chain family member 1	200.107	1500.95	18.8344
Acss2	acyl-CoA synthetase short-chain family member 2	225.053	271.375	187.453
Acss3	acyl-CoA synthetase short-chain family member 3	4.94276	3.79418	1.09715
Acta1	actin, alpha 1, skeletal muscle	1.39988	4.60707	526.317
Acta2	actin, alpha 2, smooth muscle, aorta	210.666	886.495	84.7588
Actb	actin, beta	1.0523e+06	1.32847e+06	1.56181e+06
Actbl2	actin, beta-like 2	0	0.296329	1.76444
Actc1	actin, alpha, cardiac muscle 1	0	1.77561	0.752925
Actg1	actin, gamma, cytoplasmic 1	4206.88	8386.76	9496.14
Actg2	actin, gamma 2, smooth muscle, enteric	6.22949	16.035	0
Actl6a	actin-like 6A	610.793	762.1	829.77
Actl7a	actin-like 7a	0.558743	3.14196	1.00093
Actl7b	actin-like 7b	1.25485	3.90948	3.70016
Actl9	actin-like 9	2.96129	2.42928	2.00186
Actn1	actinin, alpha 1	1886.85	1858.13	3362.91
Actn2	actinin alpha 2	0	1.17823	11.0094
Actn3	actinin alpha 3	3.86343	0.888988	8.57931
Actn4	actinin alpha 4	2155.59	3965.01	4020.14
Actr10	ARP10 actin-related protein 10	2076.27	2350.02	2742.61
Actr1a	ARP1 actin-related protein 1A, centractin alpha	2550.51	3003.5	4203.45
Actr1b	ARP1 actin-related protein 1B, centractin beta	1302.28	1331.33	1845.14
Actr2	ARP2 actin-related protein 2	54742.8	47897.3	77379.5
Actr3	ARP3 actin-related protein 3	4707.91	6334.77	5043.12
Actr3b	ARP3 actin-related protein 3B	38.5464	19.1315	4.23304
Actr5	ARP5 actin-related protein 5	157.771	148.674	151.597
Actr6	ARP6 actin-related protein 6	294.686	339.234	382.015
Actr8	ARP8 actin-related protein 8	619.865	666.076	699.039
Acvr1	activin A receptor, type 1	1986.46	835.683	1265.92
Acvr1b	activin A receptor, type 1B	170.066	259.313	117.507
Acvr1c	activin A receptor, type IC	30.7544	17.5894	2.27615
Acvr2a	activin receptor IIA	1048.8	1372.43	853.224
Acvr2b	activin receptor IIB	98.7739	165.619	107.593
Acvrl1	activin A receptor, type II-like 1	908.886	2800.4	1204.67
Acy1	aminoacylase 1	153.24	188.379	257.009
Acy3	aspartoacylase (aminoacylase) 3	372.584	799.195	592.464
Acyp1	acylphosphatase 1, erythrocyte (common) type	231.305	233.746	310.73
Acyp2	acylphosphatase 2, muscle type	198.337	490.477	120.488
Ada	adenosine deaminase	46.4009	124.124	163.011
Adal	adenosine deaminase-like	222.794	193.548	194.536
Adam10	a disintegrin and metallopeptidase domain 10	27969.5	21990.9	36308.3
Adam11	a disintegrin and metallopeptidase domain 11	7.83343	19.5602	10.1988
Adam12	a disintegrin and metallopeptidase domain 12 (meltrin alpha)	851.671	466.128	1415.47
Adam15	a disintegrin and metallopeptidase domain 15 (metargidin)	1631.24	6799.69	1154.31
Adam17	a disintegrin and metallopeptidase domain 17	6017.97	5563.61	4348.73
Adam19	a disintegrin and metallopeptidase domain 19 (meltrin beta)	248.869	592.045	1856.73
Adam1a	a disintegrin and metallopeptidase domain 1a	92.6926	99.0365	204.635
Adam21	a disintegrin and metallopeptidase domain 21	5.30141	3.12779	7.11165
Adam22	a disintegrin and metallopeptidase domain 22	184.756	321.223	382.799
Adam23	a disintegrin and metallopeptidase domain 23	9.72936	27.6831	2.60979
Adam28	a disintegrin and metallopeptidase domain 28	1.08632	12.7205	0
Adam3	a disintegrin and metallopeptidase domain 3 (cyritestin)	1.75158	1.47692	8.3538
Adam30	a disintegrin and metallopeptidase domain 30	2.3235	1.76853	2.49108
Adam32	a disintegrin and metallopeptidase domain 32	35.2369	27.6495	5.60959
Adam33	a disintegrin and metallopeptidase domain 33	4173.3	99.6431	192.28
Adam39	a disintegrin and metallopeptidase domain 39	2.84738	0	0
Adam4	a disintegrin and metallopeptidase domain 4	42.2612	50.4033	45.0439
Adam5	a disintegrin and metallopeptidase domain 5	116.038	109.989	0.419282
Adam7	a disintegrin and metallopeptidase domain 7	1.46903	0	2.51569
Adam8	a disintegrin and metallopeptidase domain 8	67.7478	43.5706	57.1487
Adam9	a disintegrin and metallopeptidase domain 9 (meltrin gamma)	9434.78	4101.79	1776.58
Adamdec1	ADAM-like, decysin 1	0.558743	6.0188	0
Adamts1	a disintegrin-like and metallopeptidase (reprolysin type) with thrombospondin type 1 motif, 1	977.073	3689.53	5625.5
Adamts10	a disintegrin-like and metallopeptidase (reprolysin type) with thrombospondin type 1 motif, 10	630.364	746.975	909.098
Adamts12	a disintegrin-like and metallopeptidase (reprolysin type) with thrombospondin type 1 motif, 12	43.7263	123.915	14.7672
Adamts13	a disintegrin-like and metallopeptidase (reprolysin type) with thrombospondin type 1 motif, 13	2.63388	3.30264	0.333644
Adamts14	a disintegrin-like and metallopeptidase (reprolysin type) with thrombospondin type 1 motif, 14	20.1351	18.027	4.69941
Adamts15	a disintegrin-like and metallopeptidase (reprolysin type) with thrombospondin type 1 motif, 15	20.8476	55.7902	117.042
Adamts16	a disintegrin-like and metallopeptidase (reprolysin type) with thrombospondin type 1 motif, 16	3.47131	6.34348	1.67713
Adamts17	a disintegrin-like and metallopeptidase (reprolysin type) with thrombospondin type 1 motif, 17	23.3445	13.1354	8.93756
Adamts18	a disintegrin-like and metallopeptidase (reprolysin type) with thrombospondin type 1 motif, 18	9.87491	133.706	0.941576
Adamts19	a disintegrin-like and metallopeptidase (reprolysin type) with thrombospondin type 1 motif, 19	3.15014	8.65075	8.34022
Adamts2	a disintegrin-like and metallopeptidase (reprolysin type) with thrombospondin type 1 motif, 2	111.354	62.1924	69.759
Adamts20	a disintegrin-like and metallopeptidase (reprolysin type) with thrombospondin type 1 motif, 20	13.6198	19.0177	3.19356
Adamts3	a disintegrin-like and metallopeptidase (reprolysin type) with thrombospondin type 1 motif, 3	87.4792	30.6862	129.842
Adamts4	a disintegrin-like and metallopeptidase (reprolysin type) with thrombospondin type 1 motif, 4	416.723	517.986	1079.48
Adamts5	a disintegrin-like and metallopeptidase (reprolysin type) with thrombospondin type 1 motif, 5 (aggrecanase-2)	1707.81	666.886	4063.56
Adamts6	a disintegrin-like and metallopeptidase (reprolysin type) with thrombospondin type 1 motif, 6	224.415	236.716	173.067
Adamts7	a disintegrin-like and metallopeptidase (reprolysin type) with thrombospondin type 1 motif, 7	122.869	345.995	27.5185
Adamts8	a disintegrin-like and metallopeptidase (reprolysin type) with thrombospondin type 1 motif, 8	11.7257	9.15603	2.91037
Adamts9	a disintegrin-like and metallopeptidase (reprolysin type) with thrombospondin type 1 motif, 9	7947.28	11776.6	1526.94
Adamtsl1	ADAMTS-like 1	140.616	61.1087	4374.11
Adamtsl2	ADAMTS-like 2	25.3102	33.1399	7.59408
Adamtsl3	ADAMTS-like 3	132.847	215.401	303.007
Adamtsl4	ADAMTS-like 4	107.992	106.966	1452.79
Adamtsl5	ADAMTS-like 5	6.37769	20.8443	26.0839
Adap1	ArfGAP with dual PH domains 1	3.69173	9.99819	5.07839
Adap2	ArfGAP with dual PH domains 2	136.669	214.134	9.60485
Adar	adenosine deaminase, RNA-specific	1781.94	1961.43	1503.72
Adarb1	adenosine deaminase, RNA-specific, B1	487.194	1297.87	771.993
Adarb2	adenosine deaminase, RNA-specific, B2	12.0029	7.33268	0
Adat1	adenosine deaminase, tRNA-specific 1	76.5606	108.13	79.4896
Adat2	adenosine deaminase, tRNA-specific 2	50.9922	31.6073	58.307
Adat3	adenosine deaminase, tRNA-specific 3	40.6625	47.0817	61.2796
Adc	arginine decarboxylase	100.263	7.99434	36.744
Adck1	aarF domain containing kinase 1	389.735	382.7	447.96
Adck2	aarF domain containing kinase 2	297.514	331.617	272.525
Adck3	aarF domain containing kinase 3	304.692	251.57	269.534
Adck4	aarF domain containing kinase 4	171.452	185.702	297.193
Adck5	aarF domain containing kinase 5	302.192	236.124	319.413
Adcy1	adenylate cyclase 1	1.97195	0.652215	1.88315
Adcy10	adenylate cyclase 10	2.54785	14.4186	4.47046
Adcy2	adenylate cyclase 2	1.81359	3.14105	2.78998
Adcy3	adenylate cyclase 3	40.4546	35.753	17.3613
Adcy4	adenylate cyclase 4	4249.55	10371.5	3933.1
Adcy5	adenylate cyclase 5	185.404	812.395	5.51337
Adcy6	adenylate cyclase 6	765.714	596.985	630.716
Adcy7	adenylate cyclase 7	329.013	174.929	197.434
Adcy8	adenylate cyclase 8	5.65035	15.7633	0
Adcy9	adenylate cyclase 9	170.99	94.1791	76.4627
Adcyap1r1	adenylate cyclase activating polypeptide 1 receptor 1	25.2044	41.5389	5.45234
Add1	adducin 1 (alpha)	8490.49	3496.97	8018.28
Add2	adducin 2 (beta)	0.940656	0.355885	27.3663
Add3	adducin 3 (gamma)	4274.24	1860.06	13441.1
Adh1	alcohol dehydrogenase 1 (class I)	543.761	537.057	53.6338
Adh5	alcohol dehydrogenase 5 (class III), chi polypeptide	1767.31	1776.26	1955.04
Adh7	alcohol dehydrogenase 7 (class IV), mu or sigma polypeptide	9.62791	29.5623	1.79072
Adhfe1	alcohol dehydrogenase, iron containing, 1	21.3169	135.829	16.3217
Adi1	acireductone dioxygenase 1	884.745	939.405	828.363
Adig	adipogenin	4.29979	27.607	8.13375
Adipoq	adiponectin, C1Q and collagen domain containing	8.45523	59.9754	0.419282
Adipor1	adiponectin receptor 1	3787.86	5639.18	4822.78
Adipor2	adiponectin receptor 2	1314.56	2597.54	1142.71
Adk	adenosine kinase	374.375	237.291	937.417
Adm	adrenomedullin	1608.44	982.112	3800.42
Adm2	adrenomedullin 2	110.522	3.71572	1.25785
Adnp	activity-dependent neuroprotective protein	4419.88	3894.83	4285.32
Adnp2	ADNP homeobox 2	458.851	358.801	762.785
Ado	2-aminoethanethiol (cysteamine) dioxygenase	2360.37	2074.34	2686.91
Adora1	adenosine A1 receptor	5.71682	29.2675	0.274288
Adora2a	adenosine A2a receptor	73.3076	488.148	898.206
Adora2b	adenosine A2b receptor	3.02727	8.80251	4.05629
Adora3	adenosine A3 receptor	0.872295	0.355885	1.27522
Adpgk	ADP-dependent glucokinase	266.989	277.645	331.091
Adprh	ADP-ribosylarginine hydrolase	1983.95	995.903	2036.17
Adprhl2	ADP-ribosylhydrolase like 2	104.416	83.6155	85.7003
Adra1a	adrenergic receptor, alpha 1a	7.45004	10.3693	0.548577
Adra1b	adrenergic receptor, alpha 1b	1398.1	33.3169	3.04857
Adra2a	adrenergic receptor, alpha 2a	128.376	55.2368	14.584
Adra2b	adrenergic receptor, alpha 2b	1.59254	9.11065	24.5921
Adra2c	adrenergic receptor, alpha 2c	10.5082	14.5566	0.667287
Adrb1	adrenergic receptor, beta 1	7.17882	17.7795	0.333644
Adrb2	adrenergic receptor, beta 2	414.117	677.439	2710.91
Adrb3	adrenergic receptor, beta 3	13.7308	15.9353	6.27688
Adrbk1	adrenergic receptor kinase, beta 1	618.557	956.013	677.368
Adrbk2	adrenergic receptor kinase, beta 2	321.201	301.943	65.8357
Adrm1	adhesion regulating molecule 1	785.525	834.197	890.704
Adsl	adenylosuccinate lyase	652.05	760.522	845.971
Adss	adenylosuccinate synthetase, non muscle	7565.27	8478	8204.55
Adssl1	adenylosuccinate synthetase like 1	127.41	21.4493	10.1394
Aebp1	AE binding protein 1	1050.36	759.073	2803.04
Aebp2	AE binding protein 2	9855	9304.8	6149.99
Aen	apoptosis enhancing nuclease	161.214	181.322	143.149
Aes	amino-terminal enhancer of split	7143.39	6294.25	5626.74
Afap1	actin filament associated protein 1	14408.9	12108.3	10553.5
Afap1l1	actin filament associated protein 1-like 1	3942.09	3966.37	8510.73
Afap1l2	actin filament associated protein 1-like 2	95.2042	737.821	772.158
Aff1	AF4/FMR2 family, member 1	3900.02	3346.41	1953.32
Aff2	AF4/FMR2 family, member 2	0.748113	7.44561	0.333644
Aff3	AF4/FMR2 family, member 3	2001.4	412.764	1188.78
Aff4	AF4/FMR2 family, member 4	4055.43	3809.29	4503.3
Afg3l1	AFG3(ATPase family gene 3)-like 1 (yeast)	523.361	426.465	481.533
Afg3l2	AFG3(ATPase family gene 3)-like 2 (yeast)	761.731	629.663	873.697
Afmid	arylformamidase	70.3234	115.179	66.76
Aftph	aftiphilin	2747.55	3116.42	2576.95
Aga	aspartylglucosaminidase	795.859	644.318	776.57
Agap1	ArfGAP with GTPase domain, ankyrin repeat and PH domain 1	762.141	1700.61	2766.66
Agap2	ArfGAP with GTPase domain, ankyrin repeat and PH domain 2	8.80192	30.3789	11.3083
Agap3	ArfGAP with GTPase domain, ankyrin repeat and PH domain 3	1207.88	1677.44	1019.25
Agbl2	ATP/GTP binding protein-like 2	25.3917	3.35983	6.99126
Agbl3	ATP/GTP binding protein-like 3	143.998	77.8273	122.726
Agbl4	ATP/GTP binding protein-like 4	1.83126	0.592659	0
Agbl5	ATP/GTP binding protein-like 5	172.661	164.146	185.046
Ager	advanced glycosylation end product-specific receptor	264.123	134.338	308.772
Agfg1	ArfGAP with FG repeats 1	3800.57	1473.87	2596.51
Agfg2	ArfGAP with FG repeats 2	299.986	195.247	587.28
Aggf1	angiogenic factor with G patch and FHA domains 1	840.543	1027.84	1088.36
Agk	acylglycerol kinase	225.121	183.237	259.351
Agl	amylo-1,6-glucosidase, 4-alpha-glucanotransferase	331.488	255.767	314.105
Agmat	agmatine ureohydrolase (agmatinase)	1.63438	0.884263	2.76537
Agmo	alkylglycerol monooxygenase	176.599	248.257	463.163
Agpat1	1-acylglycerol-3-phosphate O-acyltransferase 1 (lysophosphatidic acid acyltransferase, alpha)	1238.85	1097.16	654.735
Agpat2	1-acylglycerol-3-phosphate O-acyltransferase 2 (lysophosphatidic acid acyltransferase, beta)	339.398	620.713	377.128
Agpat3	1-acylglycerol-3-phosphate O-acyltransferase 3	1385.47	867.936	1181.46
Agpat4	1-acylglycerol-3-phosphate O-acyltransferase 4 (lysophosphatidic acid acyltransferase, delta)	963.407	770.637	448.456
Agpat5	1-acylglycerol-3-phosphate O-acyltransferase 5 (lysophosphatidic acid acyltransferase, epsilon)	3472.55	3726.61	1646.58
Agpat6	1-acylglycerol-3-phosphate O-acyltransferase 6 (lysophosphatidic acid acyltransferase, zeta)	857.906	777.106	834.818
Agpat9	1-acylglycerol-3-phosphate O-acyltransferase 9	85.1405	138.836	624.961
Agphd1	NA	2088.51	2215.56	1084.29
Agps	alkylglycerone phosphate synthase	3072.39	3469.45	2171.5
Agr2	anterior gradient 2	15.9741	34.4942	17.5503
Agr3	anterior gradient 3	0.155189	1.48165	1.11285
Agrn	agrin	10476.8	7895.45	9547.53
Agrp	agouti related protein	0.94447	0.587934	3.25459
Agt	angiotensinogen (serpin peptidase inhibitor, clade A, member 8)	124.334	272.386	4.71679
Agtpbp1	ATP/GTP binding protein 1	1186.75	1058.32	1553.1
Agtr1a	angiotensin II receptor, type 1a	14.6682	144.659	36.6401
Agtr2	angiotensin II receptor, type 2	2.00613	0.71177	4.52646
Agtrap	angiotensin II, type I receptor-associated protein	902.362	1409.69	1896.27
Agxt	alanine-glyoxylate aminotransferase	0	0	1.27522
Agxt2l1	NA	1.19283	2.12441	3.20926
Agxt2l2	NA	166.631	197.452	204.803
Ahctf1	AT hook containing transcription factor 1	3444.26	3376.43	3534.18
Ahcy	S-adenosylhomocysteine hydrolase	189.28	169.865	196.591
Ahcyl1	S-adenosylhomocysteine hydrolase-like 1	12349	6297.55	7010.63
Ahcyl2	S-adenosylhomocysteine hydrolase-like 2	1057.83	970.928	1101.22
Ahdc1	AT hook, DNA binding motif, containing 1	363.73	465.703	404.555
Ahi1	Abelson helper integration site 1	528.908	518.521	681.834
Ahnak	AHNAK nucleoprotein (desmoyokin)	59958.1	105687	230538
Ahr	aryl-hydrocarbon receptor	2682.74	8074.52	3860.53
Ahrr	aryl-hydrocarbon receptor repressor	3.24712	6.79812	0.667287
Ahsa1	AHA1, activator of heat shock protein ATPase 1	802.223	794.335	1000.88
Ahsa2	AHA1, activator of heat shock protein ATPase 2	454.939	457.139	394.054
Ahsg	alpha-2-HS-glycoprotein	62.7462	58.2473	394.293
Aicda	activation-induced cytidine deaminase	2.80875	2.12441	1.8238
Aif1	allograft inflammatory factor 1	132.839	19.3995	15.0241
Aif1l	allograft inflammatory factor 1-like	1305.62	1203.15	25.1513
Aifm1	apoptosis-inducing factor, mitochondrion-associated 1	519.083	605.207	551.974
Aifm2	apoptosis-inducing factor, mitochondrion-associated 2	152.003	219.634	146.582
Aifm3	apoptosis-inducing factor, mitochondrion-associated 3	1.87243	3.85282	4.28013
Aig1	androgen-induced 1	362.818	265.383	488.034
Aim1	absent in melanoma 1	74.0526	877.875	41.6825
Aim1l	absent in melanoma 1-like	0.592923	2.48266	0.822865
Aim2	absent in melanoma 2	6.88896	275.301	1.33457
Aimp1	aminoacyl tRNA synthetase complex-interacting multifunctional protein 1	787.519	668.233	639.353
Aimp2	aminoacyl tRNA synthetase complex-interacting multifunctional protein 2	484.844	434.383	550.17
Aip	aryl-hydrocarbon receptor-interacting protein	1386.92	1248.2	1468.18
Aipl1	aryl hydrocarbon receptor-interacting protein-like 1	22.4024	17.8701	3.85027
Aire	autoimmune regulator (autoimmune polyendocrinopathy candidiasis ectodermal dystrophy)	2.6897	0	0
Airn	antisense Igf2r RNA	725.593	1491.63	664.657
Ajap1	adherens junction associated protein 1	28.5206	4.32637	10.2912
Ak1	adenylate kinase 1	33.6067	146.036	43.045
Ak2	adenylate kinase 2	8808.71	3437.97	2759.63
Ak3	adenylate kinase 3	1564.53	4090.43	1920.95
Ak4	adenylate kinase 4	430.605	127.152	1895.8
Ak5	adenylate kinase 5	23.0286	51.3881	52.9677
Ak7	adenylate kinase 7	1.84142	4.60943	12.4838
Ak8	adenylate kinase 8	5.12389	1.17823	2.19942
Akap1	A kinase (PRKA) anchor protein 1	1238.3	784.042	632.472
Akap10	A kinase (PRKA) anchor protein 10	1212.84	1334.58	979.154
Akap11	A kinase (PRKA) anchor protein 11	2957.49	3374.05	3518.39
Akap12	A kinase (PRKA) anchor protein (gravin) 12	1875.35	2676.18	21425.9
Akap13	A kinase (PRKA) anchor protein 13	6882.99	7855.81	13581.1
Akap14	A kinase (PRKA) anchor protein 14	18.6382	25.4528	24.3792
Akap17b	A kinase (PRKA) anchor protein 17B	368.149	350.88	469.796
Akap2	A kinase (PRKA) anchor protein 2	3911.39	9722	5077.06
Akap5	A kinase (PRKA) anchor protein 5	87.8714	541.509	98.2424
Akap6	A kinase (PRKA) anchor protein 6	14.2772	52.8859	9.36743
Akap7	A kinase (PRKA) anchor protein 7	460.296	784.997	1049.76
Akap8	A kinase (PRKA) anchor protein 8	5861.27	8038.16	6672.44
Akap8l	A kinase (PRKA) anchor protein 8-like	518.471	546.965	516.962
Akap9	A kinase (PRKA) anchor protein (yotiao) 9	2884.08	3010.66	2355.22
Akirin1	akirin 1	1035.37	1017.68	1188.14
Akirin2	akirin 2	1731.2	1610.84	1649.32
Akna	AT-hook transcription factor	114.823	277.889	42.2735
Aknad1	AKNA domain containing 1	10.481	4.6118	14.9193
Akr1a1	aldo-keto reductase family 1, member A1 (aldehyde reductase)	13824.4	12130	13386.2
Akr1b10	aldo-keto reductase family 1, member B10 (aldose reductase)	211.111	322.668	39.9112
Akr1b7	aldo-keto reductase family 1, member B7	2.80689	6.6672	0
Akr1b8	aldo-keto reductase family 1, member B8	83.7891	97.1664	534.621
Akr1c12	aldo-keto reductase family 1, member C12	8.5491	3.90239	0.333644
Akr1c13	aldo-keto reductase family 1, member C13	118.214	109.152	2.355
Akr1c14	aldo-keto reductase family 1, member C14	28.2856	3128.85	14.1681
Akr1c18	aldo-keto reductase family 1, member C18	1.89593	1.83517	0
Akr1c19	aldo-keto reductase family 1, member C19	2.29249	94.8894	3.68446
Akr1c21	aldo-keto reductase family 1, member C21	15.8591	22.308	20.8796
Akr1c6	aldo-keto reductase family 1, member C6	0	0	1.02721
Akr1cl	aldo-keto reductase family 1, member C-like	14.3938	6.3373	0
Akr1e1	aldo-keto reductase family 1, member E1	592.164	496.021	632.88
Akr7a5	aldo-keto reductase family 7, member A5 (aflatoxin aldehyde reductase)	259.96	209.29	256.859
Akt1	thymoma viral proto-oncogene 1	4374.9	4916.51	4315.05
Akt1s1	AKT1 substrate 1 (proline-rich)	248.935	337.208	257.579
Akt2	thymoma viral proto-oncogene 2	323.72	266.222	372.867
Akt3	thymoma viral proto-oncogene 3	1186.42	2197.54	718.667
Aktip	thymoma viral proto-oncogene 1 interacting protein	669.075	713.402	821.078
Alad	aminolevulinate, delta-, dehydratase	246.056	476.726	204.114
Alas1	aminolevulinic acid synthase 1	393.011	581.481	476.681
Alas2	aminolevulinic acid synthase 2, erythroid	27.9442	44.7015	26.3845
Alb	albumin	0	0.71177	42.6072
Alcam	activated leukocyte cell adhesion molecule	19520.3	777.464	632.488
Aldh16a1	aldehyde dehydrogenase 16 family, member A1	592.77	447.133	373.952
Aldh18a1	aldehyde dehydrogenase 18 family, member A1	716.381	708.463	275.729
Aldh1a1	aldehyde dehydrogenase family 1, subfamily A1	21.545	55.2613	206.568
Aldh1a2	aldehyde dehydrogenase family 1, subfamily A2	5.15385	10.7913	218.733
Aldh1a3	aldehyde dehydrogenase family 1, subfamily A3	240.093	80.5948	24.0553
Aldh1a7	aldehyde dehydrogenase family 1, subfamily A7	8.55603	21.3408	1.59149
Aldh1b1	aldehyde dehydrogenase 1 family, member B1	44.0359	3.65616	2.82473
Aldh1l1	aldehyde dehydrogenase 1 family, member L1	131.521	68.0168	2.66236
Aldh1l2	aldehyde dehydrogenase 1 family, member L2	58.2415	92.8085	25.7677
Aldh2	aldehyde dehydrogenase 2, mitochondrial	410.608	687.068	1191.86
Aldh3a1	aldehyde dehydrogenase family 3, subfamily A1	2.99876	3.67415	0.548577
Aldh3a2	aldehyde dehydrogenase family 3, subfamily A2	1365.09	1410.2	2092.25
Aldh3b1	aldehyde dehydrogenase 3 family, member B1	177.669	156.54	143.774
Aldh3b2	aldehyde dehydrogenase 3 family, member B2	11.7415	27.0883	1.6945
Aldh4a1	aldehyde dehydrogenase 4 family, member A1	344.778	196.945	358.844
Aldh5a1	aldhehyde dehydrogenase family 5, subfamily A1	521.999	248.334	556.58
Aldh6a1	aldehyde dehydrogenase family 6, subfamily A1	710.51	695.497	984.889
Aldh7a1	aldehyde dehydrogenase family 7, member A1	843.185	481.896	928.005
Aldh8a1	aldehyde dehydrogenase 8 family, member A1	2.51986	7.57181	8.48141
Aldh9a1	aldehyde dehydrogenase 9, subfamily A1	1248.46	998.757	616.023
Aldoa	aldolase A, fructose-bisphosphate	9059.49	10067.5	19026.4
Aldoart1	aldolase 1 A, retrogene 1	18.1148	21.8085	27.5355
Aldob	aldolase B, fructose-bisphosphate	9.39111	15.7882	29.4343
Aldoc	aldolase C, fructose-bisphosphate	6.99663	12.7281	10.4909
Alg1	asparagine-linked glycosylation 1 (beta-1,4-mannosyltransferase)	90.8284	111.685	85.3586
Alg10b	asparagine-linked glycosylation 10B (alpha-1,2-glucosyltransferase)	235.889	183.845	223.259
Alg11	asparagine-linked glycosylation 11 (alpha-1,2-mannosyltransferase)	2570.15	2167.38	2043.47
Alg12	asparagine-linked glycosylation 12 (alpha-1,6-mannosyltransferase)	129.936	140.247	116.607
Alg13	asparagine-linked glycosylation 13	178.66	259.025	203.195
Alg14	asparagine-linked glycosylation 14	532.06	545.62	575.124
Alg2	asparagine-linked glycosylation 2 (alpha-1,3-mannosyltransferase)	1334.17	1429.78	804.366
Alg3	asparagine-linked glycosylation 3 (alpha-1,3-mannosyltransferase)	548.372	565.539	612.162
Alg5	asparagine-linked glycosylation 5 (dolichyl-phosphate beta-glucosyltransferase)	1115.11	1126.61	1267.96
Alg6	asparagine-linked glycosylation 6 (alpha-1,3,-glucosyltransferase)	1045.07	1187.55	726.37
Alg8	asparagine-linked glycosylation 8 (alpha-1,3-glucosyltransferase)	225.662	252.83	183.75
Alg9	asparagine-linked glycosylation 9 (alpha 1,2 mannosyltransferase)	889.822	626.291	702.548
Alkbh1	alkB, alkylation repair homolog 1 (E. coli)	384.139	397.142	280.312
Alkbh2	alkB, alkylation repair homolog 2 (E. coli)	221.918	251.483	334.901
Alkbh3	alkB, alkylation repair homolog 3 (E. coli)	1120.5	1427.61	1116.6
Alkbh4	alkB, alkylation repair homolog 4 (E. coli)	427.815	484.053	403.275
Alkbh5	alkB, alkylation repair homolog 5 (E. coli)	19006.1	22263.2	14634.4
Alkbh6	alkB, alkylation repair homolog 6 (E. coli)	553.554	579.3	605.439
Alkbh7	alkB, alkylation repair homolog 7 (E. coli)	536.949	583.118	530.271
Alkbh8	alkB, alkylation repair homolog 8 (E. coli)	664.983	662.769	516.105
Allc	allantoicase	0	3.19207	0
Alms1	Alstrom syndrome 1	68.0689	108.64	95.9399
Alox12	arachidonate 12-lipoxygenase	24.3465	1627.97	14.9012
Alox12e	arachidonate lipoxygenase, epidermal	3.59236	3.90002	14.0842
Alox15	arachidonate 15-lipoxygenase	0.775946	6.09634	10.5922
Alox5	arachidonate 5-lipoxygenase	2.95192	8.80487	1.21586
Alox5ap	arachidonate 5-lipoxygenase activating protein	117.392	42.9852	44.893
Alox8	arachidonate 8-lipoxygenase	0.641079	3.36928	0.69357
Aloxe3	arachidonate lipoxygenase 3	7.10998	4.32728	7.12056
Alpk1	alpha-kinase 1	387.884	248.313	269.559
Alpk2	alpha-kinase 2	26.5814	6.02207	6.95651
Alpk3	alpha-kinase 3	1.58305	8.93762	20.3683
Alpl	alkaline phosphatase, liver/bone/kidney	5.44708	303.967	2.64666
Als2	amyotrophic lateral sclerosis 2 (juvenile)	304.791	240.98	199.401
Als2cl	ALS2 C-terminal like	1115.7	2178.96	1757.6
Als2cr11	amyotrophic lateral sclerosis 2 (juvenile) chromosome region, candidate 11 (human)	0.465567	0.71177	1.90943
Als2cr12	amyotrophic lateral sclerosis 2 (juvenile) chromosome region, candidate 12 (human)	3.85085	6.80194	0
Als2cr4	NA	545.087	411.157	729.338
Alx4	aristaless-like homeobox 4	24.9739	8.47353	4.35686
Alyref	Aly/REF export factor	578.003	638.377	728.443
Alyref2	Aly/REF export factor 2	163.378	184.191	183.231
Amac1	NA	1.87878	1.24487	4.91602
Amacr	alpha-methylacyl-CoA racemase	298.989	351.391	401.971
Ambp	alpha 1 microglobulin/bikunin	2.9849	2.6646	2.51737
Ambra1	autophagy/beclin 1 regulator 1	615.841	616.875	596.634
Amdhd1	amidohydrolase domain containing 1	0.903302	2.30544	9.08935
Amdhd2	amidohydrolase domain containing 2	813.488	655.63	1058.39
Amelx	amelogenin, X-linked	1.10982	2.19105	19.1906
Amfr	autocrine motility factor receptor	4438.25	4575.54	5925.2
Amhr2	anti-Mullerian hormone type 2 receptor	5.01622	14.9461	22.6008
Amica1	adhesion molecule, interacts with CXADR antigen 1	6.20868	6.02589	0.333644
Amigo1	adhesion molecule with Ig like domain 1	799.031	452.227	260.388
Amigo2	adhesion molecule with Ig like domain 2	911.509	981.048	1066.27
Amigo3	adhesion molecule with Ig like domain 3	68.7143	39.2604	36.9657
Ammecr1	Alport syndrome, mental retardation, midface hypoplasia and elliptocytosis chromosomal region gene 1	174.022	266.62	132.284
Ammecr1l	AMME chromosomal region gene 1-like	6213.13	5223.58	4850.73
Amn	amnionless	12.4337	4.78574	2.25366
Amn1	antagonist of mitotic exit network 1	320.311	301.206	302.441
Amot	angiomotin	249.087	488.185	962.524
Amotl1	angiomotin-like 1	7437.35	6747.14	11556.5
Amotl2	angiomotin-like 2	2899.6	4806.8	4194.07
Ampd1	adenosine monophosphate deaminase 1	27.2064	67.7633	61.1796
Ampd2	adenosine monophosphate deaminase 2	531.901	664.465	615.863
Ampd3	adenosine monophosphate deaminase 3	233.154	584.692	628.227
Amph	amphiphysin	151.821	40.433	1.25785
Amt	aminomethyltransferase	132.124	164.802	136.846
Amy1	amylase 1, salivary	70627.8	158658	362.613
Amy2b	amylase 2b	6.84175	9.54698	0
Amz1	archaelysin family metallopeptidase 1	207.978	114.277	185.471
Amz2	archaelysin family metallopeptidase 2	780.473	800.604	1118.1
Anapc1	anaphase promoting complex subunit 1	2600.44	3089.59	2923.77
Anapc10	anaphase promoting complex subunit 10	644.082	567.072	598.392
Anapc11	anaphase promoting complex subunit 11	598.262	645.323	877.958
Anapc13	anaphase promoting complex subunit 13	887.263	822.031	599.09
Anapc16	anaphase promoting complex subunit 16	1346.48	1354.7	1957.84
Anapc2	anaphase promoting complex subunit 2	2149.22	2123.68	3170.04
Anapc4	anaphase promoting complex subunit 4	1463.75	1777.4	1577.89
Anapc5	anaphase-promoting complex subunit 5	4961.44	5181.64	8163.23
Anapc7	anaphase promoting complex subunit 7	1102.65	1277.98	1341.73
Ang	angiogenin, ribonuclease, RNase A family, 5	391.011	52.0727	1840.21
Angel1	angel homolog 1 (Drosophila)	406.86	624.624	233.534
Angel2	angel homolog 2 (Drosophila)	2086.41	2487.1	2521.38
Angpt1	angiopoietin 1	515.499	47.8566	16.7483
Angpt2	angiopoietin 2	1505.51	1196.78	4469.93
Angptl1	angiopoietin-like 1	38.9708	32.9551	183.967
Angptl2	angiopoietin-like 2	583.19	432.56	1056.96
Angptl3	angiopoietin-like 3	143.248	5.90441	32.9251
Angptl4	angiopoietin-like 4	2173.19	784.325	198.345
Angptl6	angiopoietin-like 6	30.033	18.2847	16.0755
Angptl7	angiopoietin-like 7	32.7706	43.398	64.8322
Ank	progressive ankylosis	2337.54	770.914	7884.08
Ank1	ankyrin 1, erythroid	2.81256	3.01957	38.5067
Ank2	ankyrin 2, brain	988.504	250.41	5920.23
Ank3	ankyrin 3, epithelial	593.35	244.235	2036.24
Ankar	ankyrin and armadillo repeat containing	0.465567	1.5412	1.08657
Ankdd1b	ankyrin repeat and death domain containing 1B	75.8315	91.1374	93.3089
Ankfy1	ankyrin repeat and FYVE domain containing 1	2162.58	2185.28	1954.57
Ankhd1	ankyrin repeat and KH domain containing 1	3350.38	3491.05	2859.83
Ankib1	ankyrin repeat and IBR domain containing 1	2422.97	2390.65	2210.75
Ankk1	ankyrin repeat and kinase domain containing 1	1.07564	0.293967	1.95142
Ankle1	ankyrin repeat and LEM domain containing 1	28.7212	26.5299	11.446
Ankle2	ankyrin repeat and LEM domain containing 2	2514.18	2396.9	2742.15
Ankmy2	ankyrin repeat and MYND domain containing 2	2570.7	3420.88	3379.8
Ankra2	ankyrin repeat, family A (RFXANK-like), 2	540.364	479.994	809.005
Ankrd1	ankyrin repeat domain 1 (cardiac muscle)	7.92842	20.0243	111.21
Ankrd10	ankyrin repeat domain 10	3157.94	3395.34	3212.03
Ankrd11	ankyrin repeat domain 11	2066.77	2588.28	2150.9
Ankrd12	ankyrin repeat domain 12	3622.09	4088.16	3753.68
Ankrd13a	ankyrin repeat domain 13a	3556.54	2977.83	4196.69
Ankrd13b	ankyrin repeat domain 13b	229.848	127.855	472.849
Ankrd13c	ankyrin repeat domain 13c	973.103	842.386	864.589
Ankrd13d	ankyrin repeat domain 13 family, member D	119.937	73.2779	59.0336
Ankrd16	ankyrin repeat domain 16	1038.65	1175.1	1154.11
Ankrd17	ankyrin repeat domain 17	5081.3	4532.44	4485.93
Ankrd2	ankyrin repeat domain 2 (stretch responsive muscle)	44.5786	50.8564	19.3547
Ankrd22	ankyrin repeat domain 22	0	1.42354	0.419282
Ankrd23	ankyrin repeat domain 23	135.365	226.627	215.387
Ankrd24	ankyrin repeat domain 24	113.131	123.486	60.6556
Ankrd26	ankyrin repeat domain 26	403.937	326.467	398.867
Ankrd27	ankyrin repeat domain 27 (VPS9 domain)	1406.68	1363.18	1846.92
Ankrd28	ankyrin repeat domain 28	407.158	1604.61	416.931
Ankrd29	ankyrin repeat domain 29	24.3198	503.11	18.8536
Ankrd32	ankyrin repeat domain 32	474.36	476.394	477.946
Ankrd33b	ankyrin repeat domain 33B	55.5078	1013.47	14.1555
Ankrd34a	ankyrin repeat domain 34A	4.45144	23.5425	7.91714
Ankrd34b	ankyrin repeat domain 34B	1.98211	2.96238	8.89047
Ankrd35	ankyrin repeat domain 35	13.3674	11.9047	13.0744
Ankrd36	ankyrin repeat domain 36	1.85476	36.1802	0
Ankrd37	ankyrin repeat domain 37	39.462	190.922	452.504
Ankrd39	ankyrin repeat domain 39	199.847	202.652	205.546
Ankrd40	ankyrin repeat domain 40	2221.63	2134.67	2817.35
Ankrd42	ankyrin repeat domain 42	202.352	118.888	85.9123
Ankrd44	ankyrin repeat domain 44	487.64	1325.14	728.904
Ankrd46	ankyrin repeat domain 46	1866.55	1820.39	2465.9
Ankrd49	ankyrin repeat domain 49	421.072	507.44	468.238
Ankrd5	NA	1.15865	1.46983	0.419282
Ankrd50	ankyrin repeat domain 50	4275.54	4826.31	4886.58
Ankrd52	ankyrin repeat domain 52	86.5401	55.6818	49.4804
Ankrd53	ankyrin repeat domain 53	1.22701	3.37165	2.38807
Ankrd54	ankyrin repeat domain 54	239.023	179.624	253.56
Ankrd55	ankyrin repeat domain 55	16.5654	225.272	9.35852
Ankrd6	ankyrin repeat domain 6	357.067	46.5666	1470.54
Ankrd61	ankyrin repeat domain 61	26.1804	31.0471	21.8144
Ankrd7	ankyrin repeat domain 7	1.96179	3.36456	9.95587
Ankrd9	ankyrin repeat domain 9	37.1375	57.5393	17.8437
Anks1	ankyrin repeat and SAM domain containing 1	474.731	897.786	622.28
Anks1b	ankyrin repeat and sterile alpha motif domain containing 1B	47.0187	63.5873	78.3726
Anks3	ankyrin repeat and sterile alpha motif domain containing 3	693.323	740.62	815.263
Anks6	ankyrin repeat and sterile alpha motif domain containing 6	126.355	94.9281	54.8967
Ankzf1	ankyrin repeat and zinc finger domain containing 1	231.305	271.737	164.44
Anln	anillin, actin binding protein	115.394	122.086	136.013
Ano1	anoctamin 1, calcium activated chloride channel	385.526	1093.66	318.794
Ano10	anoctamin 10	576.715	462.56	595.279
Ano2	anoctamin 2	0	7.3265	0
Ano3	anoctamin 3	4.68198	0.592659	0
Ano4	anoctamin 4	1.18966	1.30443	16.5074
Ano5	anoctamin 5	0	0	11.0391
Ano6	anoctamin 6	6093.29	7140.97	3724.75
Ano7	anoctamin 7	5.12008	5.19973	2.79165
Ano8	anoctamin 8	3.71904	4.0215	1.88315
Ano9	anoctamin 9	0	0.355885	1.90943
Anp32a	acidic (leucine-rich) nuclear phosphoprotein 32 family, member A	3629.46	6830.92	4954.76
Anp32b	acidic (leucine-rich) nuclear phosphoprotein 32 family, member B	1713.98	1872.21	2233.21
Anp32e	acidic (leucine-rich) nuclear phosphoprotein 32 family, member E	5754.83	6196.8	3726.59
Anpep	alanyl (membrane) aminopeptidase	335.849	64.502	713.714
Antxr1	anthrax toxin receptor 1	1026.16	900.176	4216.86
Antxr2	anthrax toxin receptor 2	710.574	271.887	1347.46
Anubl1	NA	33.7567	35.6746	53.9411
Anxa1	annexin A1	722.746	3347.32	4502.27
Anxa11	annexin A11	24.843	19.5007	23.6068
Anxa2	annexin A2	5203.69	7057.98	19006.2
Anxa3	annexin A3	464.58	5752.03	1102.12
Anxa4	annexin A4	9712.78	7205.8	10005.4
Anxa5	annexin A5	7943.7	8906.16	11666.2
Anxa6	annexin A6	1608.96	1534.92	3646.59
Anxa7	annexin A7	4166.58	5971.89	8838.48
Anxa8	annexin A8	3.126	4.68316	157.202
Anxa9	annexin A9	113.738	85.1301	155.709
Aoah	acyloxyacyl hydrolase	3.69109	3.66561	1.00093
Aoc2	amine oxidase, copper containing 2 (retina-specific)	58.5678	154.918	85.5088
Aoc3	amine oxidase, copper containing 3	54.2903	505.075	10.9657
Aox1	aldehyde oxidase 1	489.661	299.373	531.793
Aox3	aldehyde oxidase 3	11.9862	22.5349	14.2572
Aox3l1	NA	7.28357	3.41939	13.9723
Ap1ar	adaptor-related protein complex 1 associated regulatory protein	1057.7	997.397	1476.92
Ap1b1	adaptor protein complex AP-1, beta 1 subunit	1306.23	802.894	596.429
Ap1g1	adaptor protein complex AP-1, gamma 1 subunit	4747.11	4805.81	4627.95
Ap1g2	adaptor protein complex AP-1, gamma 2 subunit	221.168	321.902	227.702
Ap1m1	adaptor-related protein complex AP-1, mu subunit 1	1099.55	1011.36	1778.38
Ap1m2	adaptor protein complex AP-1, mu 2 subunit	8.73826	29.2174	0
Ap1s1	adaptor protein complex AP-1, sigma 1	1008.58	895.62	823.556
Ap1s2	adaptor-related protein complex 1, sigma 2 subunit	184.91	351.78	273.288
Ap1s3	adaptor-related protein complex AP-1, sigma 3	34.4716	21.8023	2.85101
Ap2a1	adaptor-related protein complex 2, alpha 1 subunit	81.4328	78.0056	67.3429
Ap2a2	adaptor-related protein complex 2, alpha 2 subunit	9875.22	4214.24	8765.82
Ap2b1	adaptor-related protein complex 2, beta 1 subunit	539.082	488.891	467.091
Ap2m1	adaptor-related protein complex 2, mu 1 subunit	2389.58	2015.95	3365.97
Ap2s1	adaptor-related protein complex 2, sigma 1 subunit	1168.48	877.08	1104.79
Ap3b1	adaptor-related protein complex 3, beta 1 subunit	2077.07	1823.33	2131.92
Ap3b2	adaptor-related protein complex 3, beta 2 subunit	1.84142	0.296329	1.3015
Ap3d1	adaptor-related protein complex 3, delta 1 subunit	2548.9	2713.79	2868.48
Ap3m1	adaptor-related protein complex 3, mu 1 subunit	1921.95	1938.56	3033.78
Ap3m2	adaptor-related protein complex 3, mu 2 subunit	1434.69	1100.25	1095.09
Ap3s1	adaptor-related protein complex 3, sigma 1 subunit	1358.98	660.566	959.073
Ap3s2	adaptor-related protein complex 3, sigma 2 subunit	726.333	642.451	566.738
Ap4b1	adaptor-related protein complex AP-4, beta 1	385.341	356.91	434.227
Ap4e1	adaptor-related protein complex AP-4, epsilon 1	1119.49	1333.74	1491.04
Ap4m1	adaptor-related protein complex AP-4, mu 1	119.584	181.807	248.241
Ap4s1	adaptor-related protein complex AP-4, sigma 1	570.07	673.62	626.294
Apaf1	apoptotic peptidase activating factor 1	4790.64	3091.25	5336.67
Apba1	amyloid beta (A4) precursor protein binding, family A, member 1	164.118	73.9832	242.048
Apba2	amyloid beta (A4) precursor protein-binding, family A, member 2	61.4078	6.2603	1756.61
Apba3	amyloid beta (A4) precursor protein-binding, family A, member 3	438.259	435.911	509.837
Apbb1	amyloid beta (A4) precursor protein-binding, family B, member 1	294.145	278.953	639.193
Apbb1ip	amyloid beta (A4) precursor protein-binding, family B, member 1 interacting protein	16.6201	65.6484	8.94268
Apbb2	amyloid beta (A4) precursor protein-binding, family B, member 2	9370.52	27722.5	2995.37
Apbb3	amyloid beta (A4) precursor protein-binding, family B, member 3	213.803	264.142	292.722
Apc	adenomatosis polyposis coli	11867.7	8272.91	8051.45
Apc2	adenomatosis polyposis coli 2	16.3442	4.6118	6.65418
Apcdd1	adenomatosis polyposis coli down-regulated 1	8.54974	169.369	6.20183
Apeh	acylpeptide hydrolase	699.241	825.484	384.97
Apex1	apurinic/apyrimidinic endonuclease 1	21.668	19.0413	17.8069
Apex2	apurinic/apyrimidinic endonuclease 2	81.9946	104.8	108.32
Aph1a	anterior pharynx defective 1a homolog (C. elegans)	439.545	653.887	452.446
Aph1b	anterior pharynx defective 1b homolog (C. elegans)	331.956	185.604	3692.76
Aph1c	anterior pharynx defective 1c homolog (C. elegans)	48.8577	25.2506	332.525
Api5	apoptosis inhibitor 5	7728.62	8652.88	8664.69
Apip	APAF1 interacting protein	642.499	541.567	415.399
Apitd1	apoptosis-inducing, TAF9-like domain 1	34.806	30.5977	25.5337
Aplf	aprataxin and PNKP like factor	144.887	102.571	82.0363
Apln	apelin	17.5088	1045.19	4.26443
Aplnr	apelin receptor	174.768	17184.1	14.6277
Aplp1	amyloid beta (A4) precursor-like protein 1	72.621	188.416	149.453
Aplp2	amyloid beta (A4) precursor-like protein 2	96038.4	58945.1	117610
Apoa1	apolipoprotein A-I	6.42388	10.4198	19.9974
Apoa1bp	apolipoprotein A-I binding protein	1539.22	1250.53	1459.35
Apoa2	apolipoprotein A-II	147.44	41.4381	45.6726
Apoa4	apolipoprotein A-IV	3.09499	1.59367	0
Apoa5	apolipoprotein A-V	0	0	1.17221
Apob	apolipoprotein B	0	0.587934	3.50771
Apobec1	apolipoprotein B mRNA editing enzyme, catalytic polypeptide 1	921.932	459.165	772.952
Apobec2	apolipoprotein B mRNA editing enzyme, catalytic polypeptide 2	27.3232	22.2891	150.294
Apobec3	apolipoprotein B mRNA editing enzyme, catalytic polypeptide 3	13122.2	7671.35	4029.09
Apobec4	apolipoprotein B mRNA editing enzyme, catalytic polypeptide-like 4 (putative)	1.22003	0	0.333644
Apobr	apolipoprotein B receptor	12.1758	3.67034	4.20128
Apoc1	apolipoprotein C-I	42.5243	41.7806	9.39838
Apoc2	apolipoprotein C-II	2.1063	2.11969	1.15651
Apoc3	apolipoprotein C-III	0	0.71177	5.68085
Apod	apolipoprotein D	58.8186	90.1056	738.427
Apoe	apolipoprotein E	16171.3	27481.3	708.476
Apof	apolipoprotein F	3.95407	4.4965	2.0875
Apol10a	apolipoprotein L 10A	91.6952	22.9415	0.667287
Apol10b	apolipoprotein L 10B	1063.5	2227.08	144.616
Apol11a	apolipoprotein L 11a	36.1854	0.948544	0
Apol11b	apolipoprotein L 11b	1568.99	47.3276	5.13607
Apol6	apolipoprotein L 6	4.69583	5.03669	1.3015
Apol7a	apolipoprotein L 7a	4.0546	7.58889	9.43569
Apol7b	apolipoprotein L 7b	61.5832	1.00574	0
Apol7c	apolipoprotein L 7c	24.4524	297.464	0
Apol7d	apolipoprotein L 7d	17.8689	3.4993	29.0544
Apol8	apolipoprotein L 8	2.97542	7.6753	4.21187
Apol9a	apolipoprotein L 9a	112.447	406.202	16.5265
Apol9b	apolipoprotein L 9b	129.931	638.614	22.9938
Apold1	apolipoprotein L domain containing 1	12816.2	13914.7	183550
Apom	apolipoprotein M	2.9196	2.83618	3.03798
Apon	apolipoprotein N	14.6177	17.2837	16.0021
Apoo	apolipoprotein O	49.0111	43.9445	57.3281
Apool	apolipoprotein O-like	438.211	381.733	264.069
App	amyloid beta (A4) precursor protein	9054.61	9243.86	7171.53
Appbp2	amyloid beta precursor protein (cytoplasmic tail) binding protein 2	624.447	555.095	468.3
Appl1	adaptor protein, phosphotyrosine interaction, PH domain and leucine zipper containing 1	4795.37	4675.45	6530.39
Appl2	adaptor protein, phosphotyrosine interaction, PH domain and leucine zipper containing 2	1396.94	1111.25	5188.65
Aprt	adenine phosphoribosyl transferase	1005.23	1293.66	2276.42
Aptx	aprataxin	417.391	227.576	505.495
Aqp1	aquaporin 1	642.043	15123.1	6154.84
Aqp11	aquaporin 11	35.8794	143.617	18.2923
Aqp4	aquaporin 4	46.4071	18.4236	0.838563
Aqp5	aquaporin 5	131.318	382.633	12.9154
Aqp7	aquaporin 7	411.295	19635	44.0576
Aqp9	aquaporin 9	0.468741	8.38616	3.50092
Aqr	aquarius	499.985	646.446	500.844
Ar	androgen receptor	472.549	2564.47	351.384
Araf	v-raf murine sarcoma 3611 viral oncogene homolog	1949.27	1975.85	2551.27
Arap1	ArfGAP with RhoGAP domain, ankyrin repeat and PH domain 1	1415.76	298.637	291.921
Arap2	ArfGAP with RhoGAP domain, ankyrin repeat and PH domain 2	129.522	923.203	64.5367
Arap3	ArfGAP with RhoGAP domain, ankyrin repeat and PH domain 3	2973.84	5488.98	7210.86
Arc	activity regulated cytoskeletal-associated protein	4.53985	92.2553	7.0455
Arcn1	archain 1	3596.13	3828.18	3761.44
Areg	amphiregulin	6.28886	18.2427	1.27522
Arf1	ADP-ribosylation factor 1	10250	10773.9	13765
Arf2	ADP-ribosylation factor 2	803.203	1080.6	982.451
Arf3	ADP-ribosylation factor 3	5910.35	6155.2	5266.17
Arf4	ADP-ribosylation factor 4	3945.97	3473.71	3747.8
Arf5	ADP-ribosylation factor 5	1642.59	1551.45	1925.02
Arf6	ADP-ribosylation factor 6	4754.88	7816.45	6358.95
Arfgap1	ADP-ribosylation factor GTPase activating protein 1	696.7	829.881	814.467
Arfgap2	ADP-ribosylation factor GTPase activating protein 2	738.819	742.281	1072.29
Arfgap3	ADP-ribosylation factor GTPase activating protein 3	1167.86	1206.28	1357.53
Arfgef1	ADP-ribosylation factor guanine nucleotide-exchange factor 1(brefeldin A-inhibited)	3714.09	4400.67	3631.88
Arfgef2	ADP-ribosylation factor guanine nucleotide-exchange factor 2 (brefeldin A-inhibited)	948.017	996.32	977.235
Arfip1	ADP-ribosylation factor interacting protein 1	7984.34	5652.97	5068.68
Arfip2	ADP-ribosylation factor interacting protein 2	766.785	854.578	933.807
Arfrp1	ADP-ribosylation factor related protein 1	1622.36	1698.68	1669.04
Arg1	arginase, liver	133.172	191.625	114.377
Arg2	arginase type II	14.9908	26.1372	19.2355
Arglu1	arginine and glutamate rich 1	30597.8	38431.4	42596.6
Arhgap1	Rho GTPase activating protein 1	1535.07	1287.92	1382.81
Arhgap10	Rho GTPase activating protein 10	54.624	178.481	378.409
Arhgap11a	Rho GTPase activating protein 11A	164.595	79.785	75.0408
Arhgap12	Rho GTPase activating protein 12	1358.53	1574.92	2045.62
Arhgap15	Rho GTPase activating protein 15	28.8272	145.821	1.08657
Arhgap17	Rho GTPase activating protein 17	1741.06	1640.42	1772.71
Arhgap18	Rho GTPase activating protein 18	738.14	9090.92	1884.07
Arhgap19	Rho GTPase activating protein 19	129.669	143.691	105.992
Arhgap20	Rho GTPase activating protein 20	25.7816	68.2398	6.86744
Arhgap21	Rho GTPase activating protein 21	1411.38	1169.25	2463.97
Arhgap22	Rho GTPase activating protein 22	7.00536	2.71943	5.06613
Arhgap23	Rho GTPase activating protein 23	11256.2	4758.34	6662.23
Arhgap24	Rho GTPase activating protein 24	14.821	33.51	5.45234
Arhgap25	Rho GTPase activating protein 25	289.792	391.036	345.352
Arhgap26	Rho GTPase activating protein 26	362.43	1582.55	964.034
Arhgap27	Rho GTPase activating protein 27	865.122	1905.89	2891.02
Arhgap28	Rho GTPase activating protein 28	368.034	473.761	132.258
Arhgap29	Rho GTPase activating protein 29	17443.5	15809	21610.7
Arhgap30	Rho GTPase activating protein 30	50.6585	158.261	11.0267
Arhgap31	Rho GTPase activating protein 31	7323.68	18490.1	8474.22
Arhgap32	Rho GTPase activating protein 32	403.643	113.278	668.757
Arhgap33	Rho GTPase activating protein 33	57.503	75.4643	75.1931
Arhgap39	Rho GTPase activating protein 39	379.494	256.429	398.862
Arhgap4	Rho GTPase activating protein 4	33.8249	127.555	19.5785
Arhgap42	Rho GTPase activating protein 42	4426.45	642.873	634.481
Arhgap44	Rho GTPase activating protein 44	5435.57	379.542	1099.51
Arhgap5	Rho GTPase activating protein 5	947.036	1315.89	1220.54
Arhgap6	Rho GTPase activating protein 6	84.1329	96.8278	1625.91
Arhgap8	Rho GTPase activating protein 8	98.6489	63.9051	101.959
Arhgap9	Rho GTPase activating protein 9	27.7973	79.9931	94.3048
Arhgdia	Rho GDP dissociation inhibitor (GDI) alpha	7434.12	9804.94	11175.9
Arhgdib	Rho, GDP dissociation inhibitor (GDI) beta	2896.24	1353.96	6298.68
Arhgdig	Rho GDP dissociation inhibitor (GDI) gamma	3.56501	6.62708	0.274288
Arhgef1	Rho guanine nucleotide exchange factor (GEF) 1	1765.35	1933.54	2367.29
Arhgef10	Rho guanine nucleotide exchange factor (GEF) 10	1786.2	980.967	2237.51
Arhgef10l	Rho guanine nucleotide exchange factor (GEF) 10-like	310.613	90.3049	20.1567
Arhgef11	Rho guanine nucleotide exchange factor (GEF) 11	271.812	263.076	166.455
Arhgef12	Rho guanine nucleotide exchange factor (GEF) 12	23559.4	26027.2	23642.2
Arhgef15	Rho guanine nucleotide exchange factor (GEF) 15	1020.93	4062.88	1404.1
Arhgef16	Rho guanine nucleotide exchange factor (GEF) 16	16.6749	10.1226	195.261
Arhgef17	Rho guanine nucleotide exchange factor (GEF) 17	217.307	159.928	56.2645
Arhgef18	rho/rac guanine nucleotide exchange factor (GEF) 18	2355.11	2180.23	2767.95
Arhgef19	Rho guanine nucleotide exchange factor (GEF) 19	12.726	27.7267	9.64683
Arhgef2	rho/rac guanine nucleotide exchange factor (GEF) 2	2432.45	4480.59	3693.26
Arhgef25	Rho guanine nucleotide exchange factor (GEF) 25	150.219	216.034	67.729
Arhgef26	Rho guanine nucleotide exchange factor (GEF) 26	507.23	455.239	35.8998
Arhgef3	Rho guanine nucleotide exchange factor (GEF) 3	1957.01	3133.85	2420.52
Arhgef33	Rho guanine nucleotide exchange factor (GEF) 33	6.23323	2.5493	3.85194
Arhgef37	Rho guanine nucleotide exchange factor (GEF) 37	1.42337	2.78135	2.05443
Arhgef38	Rho guanine nucleotide exchange factor (GEF) 38	0.993303	2.4912	0
Arhgef4	Rho guanine nucleotide exchange factor (GEF) 4	82.6728	32.2802	18.4338
Arhgef40	Rho guanine nucleotide exchange factor (GEF) 40	427.793	373.678	1783.45
Arhgef5	Rho guanine nucleotide exchange factor (GEF) 5	764.082	1922.74	809.806
Arhgef6	Rac/Cdc42 guanine nucleotide exchange factor (GEF) 6	439.015	456.692	389.024
Arhgef7	Rho guanine nucleotide exchange factor (GEF7)	3890.12	4018.34	2725.09
Arhgef9	CDC42 guanine nucleotide exchange factor (GEF) 9	205.961	368.766	94.8209
Arid1a	AT rich interactive domain 1A (SWI-like)	4142.34	4663.37	4394.35
Arid1b	AT rich interactive domain 1B (SWI-like)	7255.39	5975.09	6607.13
Arid2	AT rich interactive domain 2 (ARID, RFX-like)	4156.07	4275.99	3695.83
Arid3a	AT rich interactive domain 3A (BRIGHT-like)	332.843	354.207	318.094
Arid3b	AT rich interactive domain 3B (BRIGHT-like)	271.28	225.811	103.317
Arid3c	AT rich interactive domain 3C (BRIGHT-like)	0.155189	1.23779	6.82889
Arid4a	AT rich interactive domain 4A (RBP1-like)	2594.14	3633.47	3113.08
Arid4b	AT rich interactive domain 4B (RBP1-like)	2976.73	3087.87	2893.12
Arid5a	AT rich interactive domain 5A (MRF1-like)	688.581	350.658	286.27
Arid5b	AT rich interactive domain 5B (MRF1-like)	1417.59	1680.61	640.035
Arih1	ariadne ubiquitin-conjugating enzyme E2 binding protein homolog 1 (Drosophila)	2491.85	2618.04	2727.47
Arih2	ariadne homolog 2 (Drosophila)	912.428	1033.57	1057.24
Arl1	ADP-ribosylation factor-like 1	583.616	480.72	423.465
Arl10	ADP-ribosylation factor-like 10	23.7059	20.9838	15.6142
Arl11	ADP-ribosylation factor-like 11	2.61688	1.53175	0.838563
Arl13a	ADP-ribosylation factor-like 13A	4.68881	12.6657	3.72644
Arl13b	ADP-ribosylation factor-like 13B	606.108	580.752	1491.41
Arl15	ADP-ribosylation factor-like 15	483.241	1340.76	595.67
Arl16	ADP-ribosylation factor-like 16	341.559	341.965	273.692
Arl2	ADP-ribosylation factor-like 2	570.73	513.173	656.625
Arl2bp	ADP-ribosylation factor-like 2 binding protein	529.529	751.286	811.257
Arl3	ADP-ribosylation factor-like 3	525.015	431.544	654.333
Arl4a	ADP-ribosylation factor-like 4A	3566.02	3036.89	11505.4
Arl4c	ADP-ribosylation factor-like 4C	298.49	302.041	979.936
Arl4d	ADP-ribosylation factor-like 4D	92.7519	635.432	96.5541
Arl5a	ADP-ribosylation factor-like 5A	1599.75	2034.07	1698.17
Arl5b	ADP-ribosylation factor-like 5B	409.989	573.247	369.607
Arl5c	ADP-ribosylation factor-like 5C	188.957	53.6151	156.458
Arl6	ADP-ribosylation factor-like 6	490.477	581.975	692.627
Arl6ip1	ADP-ribosylation factor-like 6 interacting protein 1	12615.5	7393.15	7949.65
Arl6ip4	ADP-ribosylation factor-like 6 interacting protein 4	959.489	935.774	996.477
Arl6ip5	ADP-ribosylation factor-like 6 interacting protein 5	164.827	467.839	182.525
Arl6ip6	ADP-ribosylation factor-like 6 interacting protein 6	814.32	1052.24	1001.76
Arl8a	ADP-ribosylation factor-like 8A	1825.65	1520.65	2463.13
Arl8b	ADP-ribosylation factor-like 8B	9180.73	8395.94	8576.39
Arl9	ADP-ribosylation factor-like 9	15.9852	19.1471	10.3438
Armc1	armadillo repeat containing 1	2935.69	2944.08	3540.35
Armc10	armadillo repeat containing 10	1297.16	1003.06	1561.91
Armc2	armadillo repeat containing 2	15.246	13.7248	23.6225
Armc3	armadillo repeat containing 3	316.768	72.12	92.732
Armc4	armadillo repeat containing 4	0.465567	0	4.78673
Armc5	armadillo repeat containing 5	189.418	207.699	196.472
Armc6	armadillo repeat containing 6	116.998	93.6513	142.65
Armc7	armadillo repeat containing 7	99.9017	136.244	99.6711
Armc8	armadillo repeat containing 8	2596.57	3367.25	2571.63
Armc9	armadillo repeat containing 9	122.82	98.5091	349.702
Armcx1	armadillo repeat containing, X-linked 1	2287.27	901.033	802.624
Armcx2	armadillo repeat containing, X-linked 2	1582.59	1335.16	634.905
Armcx3	armadillo repeat containing, X-linked 3	663.099	404.027	465.321
Armcx4	armadillo repeat containing, X-linked 4	6043.78	1541.88	681.168
Armcx5	armadillo repeat containing, X-linked 5	182.76	189.723	236.958
Armcx6	armadillo repeat containing, X-linked 6	138.205	78.2916	23.2677
Arnt	aryl hydrocarbon receptor nuclear translocator	3813.28	3670.96	4044.4
Arnt2	aryl hydrocarbon receptor nuclear translocator 2	12.1618	21.3349	13.4852
Arntl	aryl hydrocarbon receptor nuclear translocator-like	464.347	685.447	552.119
Arntl2	aryl hydrocarbon receptor nuclear translocator-like 2	12.469	30.221	12.2184
Arpc1a	actin related protein 2/3 complex, subunit 1A	3053.36	3649.33	3092.97
Arpc1b	actin related protein 2/3 complex, subunit 1B	2872.62	3559.28	3410.05
Arpc2	actin related protein 2/3 complex, subunit 2	4935.37	6272.65	6658.65
Arpc3	actin related protein 2/3 complex, subunit 3	2066.34	3195.62	2875.42
Arpc4	actin related protein 2/3 complex, subunit 4	1970.8	2210.12	2046.44
Arpc5	actin related protein 2/3 complex, subunit 5	8397.15	8157.84	11950.2
Arpc5l	actin related protein 2/3 complex, subunit 5-like	779.648	861.97	718.604
Arpm1	NA	0.630918	2.06486	0.333644
Arpp19	cAMP-regulated phosphoprotein 19	2795.9	2893.93	3348.21
Arr3	arrestin 3, retinal	5.54026	7.2575	6.28367
Arrb1	arrestin, beta 1	4904.55	2992.23	5139.61
Arrb2	arrestin, beta 2	2655.84	648.73	987.68
Arrdc1	arrestin domain containing 1	1324.98	1019.89	1110.12
Arrdc2	arrestin domain containing 2	2205.87	1089.74	152.115
Arrdc3	arrestin domain containing 3	10115.1	3709.24	9725.01
Arrdc4	arrestin domain containing 4	29603.6	7768.36	1697.21
Arrdc5	arrestin domain containing 5	3.50734	8.65418	0
Arsa	arylsulfatase A	1288.16	1316.61	651.103
Arsb	arylsulfatase B	1487.33	631.823	1735.95
Arsg	arylsulfatase G	111.552	79.6361	167.66
Arsi	arylsulfatase i	0.434561	2.42547	0.548577
Arsj	arylsulfatase J	44.7006	20.7329	526.493
Arsk	arylsulfatase K	1726.29	1183.86	1329.67
Art1	ADP-ribosyltransferase 1	0.58975	1.59367	11.153
Art2a-ps	ADP-ribosyltransferase 2a, pseudogene	1511.86	28.7386	0.838563
Art2b	ADP-ribosyltransferase 2b	56.5833	1.71987	0
Art3	ADP-ribosyltransferase 3	821.732	935.407	20.0783
Art4	ADP-ribosyltransferase 4	416.567	117.246	50.7827
Art5	ADP-ribosyltransferase 5	3.20596	18.3153	1.85008
Artn	artemin	0.155189	1.5984	4.76935
Arv1	ARV1 homolog (yeast)	98.5002	79.4144	94.0738
Arvcf	armadillo repeat gene deleted in velo-cardio-facial syndrome	210.675	93.4785	137.183
Arxes1	adipocyte-related X-chromosome expressed sequence 1	3.14526	6.2603	3.57086
Arxes2	adipocyte-related X-chromosome expressed sequence 2	24.6997	87.3619	35.668
As3mt	arsenic (+3 oxidation state) methyltransferase	855.066	986.808	622.309
Asah1	N-acylsphingosine amidohydrolase 1	1996.94	1513.24	1994.62
Asah2	N-acylsphingosine amidohydrolase 2	2528.38	1743.18	1449.94
Asap1	ArfGAP with SH3 domain, ankyrin repeat and PH domain1	2348.27	2453.66	4352.27
Asap2	ArfGAP with SH3 domain, ankyrin repeat and PH domain 2	620.729	795.435	553.56
Asap3	ArfGAP with SH3 domain, ankyrin repeat and PH domain 3	41.7202	397.422	40.4047
Asb1	ankyrin repeat and SOCS box-containing 1	23.0717	202.285	48.4016
Asb10	ankyrin repeat and SOCS box-containing 10	1.02748	3.90147	4.94742
Asb11	ankyrin repeat and SOCS box-containing 11	0	1.83753	5.744
Asb13	ankyrin repeat and SOCS box-containing 13	619.711	460.846	489.12
Asb14	ankyrin repeat and SOCS box-containing 14	31.1338	58.484	37.011
Asb15	ankyrin repeat and SOCS box-containing 15	2.60605	4.97477	5.83643
Asb17	ankyrin repeat and SOCS box-containing 17	0	1.47692	0
Asb2	ankyrin repeat and SOCS box-containing 2	2.33736	9.99019	3.782
Asb3	ankyrin repeat and SOCS box-containing 3	546.882	608.925	586.757
Asb4	ankyrin repeat and SOCS box-containing 4	14.0729	1132.17	11.4498
Asb5	ankyrin repeat and SOCs box-containing 5	10.5787	4.26445	12.9103
Asb6	ankyrin repeat and SOCS box-containing 6	362.578	343.637	419.009
Asb7	ankyrin repeat and SOCS box-containing 7	1823.51	1689.55	1747.17
Asb8	ankyrin repeat and SOCS box-containing 8	1582.88	1617.73	909.44
Ascc1	activating signal cointegrator 1 complex subunit 1	294.828	287.311	502.556
Ascc2	activating signal cointegrator 1 complex subunit 2	262.96	271.741	305.837
Ascc3	activating signal cointegrator 1 complex subunit 3	1056.03	1192.8	1031.42
Ascl1	achaete-scute complex homolog 1 (Drosophila)	1.23083	0	0
Ascl2	achaete-scute complex homolog 2 (Drosophila)	4.86869	4.50358	0.333644
Ascl3	achaete-scute complex homolog 3 (Drosophila)	9.47397	18.1912	2.11378
Ascl4	achaete-scute complex homolog 4 (Drosophila)	2.85573	8.23638	4.61545
Asf1a	ASF1 anti-silencing function 1 homolog A (S. cerevisiae)	613.512	671.101	633.263
Asf1b	ASF1 anti-silencing function 1 homolog B (S. cerevisiae)	62.3096	57.6631	43.327
Asgr1	asialoglycoprotein receptor 1	1.9556	4.32873	3.61284
Asgr2	asialoglycoprotein receptor 2	1.11749	0	0
Ash1l	ash1 (absent, small, or homeotic)-like (Drosophila)	7109.47	7656.91	5730.18
Ash2l	ash2 (absent, small, or homeotic)-like (Drosophila)	1313.05	1257.68	1505.68
Asl	argininosuccinate lyase	592.669	381.776	198.518
Asna1	arsA arsenite transporter, ATP-binding, homolog 1 (bacterial)	509.71	442.972	470.29
Asns	asparagine synthetase	343.651	1298.55	605.763
Asnsd1	asparagine synthetase domain containing 1	948.464	1110.16	1118.88
Aspa	aspartoacylase	168.016	50.3358	212.001
Aspdh	aspartate dehydrogenase domain containing	0.947643	2.12677	1.02721
Aspg	asparaginase homolog (S. cerevisiae)	40.1502	40.5988	2.11378
Asph	aspartate-beta-hydroxylase	7306.73	2144.26	10128.6
Asphd1	aspartate beta-hydroxylase domain containing 1	11.3972	15.8459	2.96293
Asphd2	aspartate beta-hydroxylase domain containing 2	1.74391	3.91184	0
Aspm	asp (abnormal spindle)-like, microcephaly associated (Drosophila)	142.092	112.104	122.131
Aspn	asporin	97.1024	405.113	159.379
Asprv1	aspartic peptidase, retroviral-like 1	3.90591	4.44167	1.27522
Aspscr1	alveolar soft part sarcoma chromosome region, candidate 1 (human)	530.251	586.807	400.619
Asrgl1	asparaginase like 1	399.803	129.847	117.828
Ass1	argininosuccinate synthetase 1	3.24014	27.0176	16.9997
Aste1	asteroid homolog 1 (Drosophila)	295.445	319.738	417.067
Astl	astacin-like metalloendopeptidase (M12 family)	9.13246	1.24015	21.3493
Astn1	astrotactin 1	5812.85	1027.89	26.8652
Astn2	astrotactin 2	8.43969	1.71987	0
Asxl1	additional sex combs like 1	897.994	799.111	935.152
Asxl2	additional sex combs like 2 (Drosophila)	3316.88	3358.57	2702.43
Asxl3	additional sex combs like 3 (Drosophila)	1059.38	483.005	290.404
Atad1	ATPase family, AAA domain containing 1	3170.45	3242.98	2727.17
Atad2	ATPase family, AAA domain containing 2	3022.23	3013.8	2170.62
Atad2b	ATPase family, AAA domain containing 2B	2294.61	3023	2501.97
Atad3a	ATPase family, AAA domain containing 3A	410.082	408.842	476.093
Atad5	ATPase family, AAA domain containing 5	275.684	262.741	225.984
Atat1	alpha tubulin acetyltransferase 1	431.409	303.392	282.591
Atcay	ataxia, cerebellar, Cayman type homolog (human)	338.743	59.7469	2.36179
Ate1	arginyltransferase 1	1165.81	1238.76	1564.29
Atf1	activating transcription factor 1	2549.18	2334.22	2353.92
Atf2	activating transcription factor 2	4140.97	4549.03	3618.86
Atf3	activating transcription factor 3	119.107	251.281	1886.17
Atf4	activating transcription factor 4	4044.37	5466.93	6116.8
Atf5	activating transcription factor 5	991.443	384.833	1077.48
Atf6	activating transcription factor 6	2848.11	2746.35	2611.22
Atf6b	activating transcription factor 6 beta	1358.11	1419.6	1553.18
Atf7	activating transcription factor 7	216.305	287.959	184.793
Atf7ip	activating transcription factor 7 interacting protein	690.917	785.568	805.483
Atg10	autophagy related 10	265.164	216.166	302.909
Atg12	autophagy related 12	3093.94	3634.19	3430.48
Atg13	autophagy related 13	475.122	585.783	577.038
Atg14	autophagy related 14	869.051	1126.04	1084.85
Atg16l1	autophagy related 16-like 1 (S. cerevisiae)	672.124	867.14	881.883
Atg16l2	autophagy related 16-like 2 (S. cerevisiae)	255.774	221.129	126.948
Atg2a	autophagy related 2A	789.326	502.249	635.283
Atg2b	autophagy related 2B	2202.53	2073.06	2316.2
Atg3	autophagy related 3	1388.01	1397.94	1611.32
Atg4a	autophagy related 4A, cysteine peptidase	511.765	863.574	517.551
Atg4b	autophagy related 4B, cysteine peptidase	884.753	882.46	907.269
Atg4c	autophagy related 4C, cysteine peptidase	116.196	129.088	159.827
Atg4d	autophagy related 4D, cysteine peptidase	122.317	111.76	99.8982
Atg5	autophagy related 5	1083.09	1268.6	1416.77
Atg7	autophagy related 7	757.596	872.611	1455.85
Atg9a	autophagy related 9A	895.306	1148.82	1049.12
Atg9b	autophagy related 9B	26.1078	76.4706	184.064
Athl1	ATH1, acid trehalase-like 1 (yeast)	1045.2	787.292	840.367
Atic	5-aminoimidazole-4-carboxamide ribonucleotide formyltransferase/IMP cyclohydrolase	409.865	371.301	452.625
Atl1	atlastin GTPase 1	402.4	453.87	660.297
Atl2	atlastin GTPase 2	1503.49	1534.37	1361.45
Atl3	atlastin GTPase 3	2481.43	2448.19	2794.03
Atm	ataxia telangiectasia mutated homolog (human)	2382.74	2533.36	2078.11
Atmin	ATM interactor	468.384	343.738	552.762
Atn1	atrophin 1	1617.69	1282.5	1962.85
Atoh8	atonal homolog 8 (Drosophila)	12.9575	200.99	39.4347
Atox1	ATX1 (antioxidant protein 1) homolog 1 (yeast)	8278.85	9366.66	4339.62
Atp10a	ATPase, class V, type 10A	955.23	598.005	1316.26
Atp10b	ATPase, class V, type 10B	29.3051	12.2107	0
Atp10d	ATPase, class V, type 10D	1445.09	2604.86	1527.46
Atp11a	ATPase, class VI, type 11A	5077.73	3890.67	2177.44
Atp11b	ATPase, class VI, type 11B	3602.27	4071.54	3131.68
Atp11c	ATPase, class VI, type 11C	1963.74	1488.4	2023
Atp13a1	ATPase type 13A1	912.672	1119.18	995.999
Atp13a2	ATPase type 13A2	742.749	771.93	554.012
Atp13a3	ATPase type 13A3	2721.76	3761.13	10391.1
Atp13a4	ATPase type 13A4	0.775946	3.85282	0.274288
Atp13a5	ATPase type 13A5	0.775946	6.39031	0
Atp1a1	ATPase, Na+/K+ transporting, alpha 1 polypeptide	793.143	1340.01	845.435
Atp1a2	ATPase, Na+/K+ transporting, alpha 2 polypeptide	90.2953	112.172	118.285
Atp1a3	ATPase, Na+/K+ transporting, alpha 3 polypeptide	0.786107	0.652215	1.88315
Atp1a4	ATPase, Na+/K+ transporting, alpha 4 polypeptide	14.6322	0.355885	0.752925
Atp1b1	ATPase, Na+/K+ transporting, beta 1 polypeptide	1316.63	6243.14	854.526
Atp1b2	ATPase, Na+/K+ transporting, beta 2 polypeptide	34.1362	312.334	28.4669
Atp1b3	ATPase, Na+/K+ transporting, beta 3 polypeptide	2769.82	5199.17	4515.04
Atp1b4	ATPase, (Na+)/K+ transporting, beta 4 polypeptide	0.634092	1.53175	2.44743
Atp2a1	ATPase, Ca++ transporting, cardiac muscle, fast twitch 1	65.2957	67.1787	262.355
Atp2a2	ATPase, Ca++ transporting, cardiac muscle, slow twitch 2	10126.2	11995.7	17512.5
Atp2a3	ATPase, Ca++ transporting, ubiquitous	369.088	1776.77	21.7411
Atp2b1	ATPase, Ca++ transporting, plasma membrane 1	9327.55	8787.42	13359
Atp2b2	ATPase, Ca++ transporting, plasma membrane 2	15.4784	111.193	13.8485
Atp2b4	ATPase, Ca++ transporting, plasma membrane 4	1880.16	5398.54	4581.36
Atp2c1	ATPase, Ca++-sequestering	7311.65	8814.31	8056.93
Atp2c2	ATPase, Ca++ transporting, type 2C, member 2	1.05532	1.23779	0
Atp4a	ATPase, H+/K+ exchanging, gastric, alpha polypeptide	2.86771	1.06766	0.607932
Atp5a1	ATP synthase, H+ transporting, mitochondrial F1 complex, alpha subunit 1	11780.2	12488.8	12202.3
Atp5b	ATP synthase, H+ transporting mitochondrial F1 complex, beta subunit	7784.44	7087.48	8245.31
Atp5c1	ATP synthase, H+ transporting, mitochondrial F1 complex, gamma polypeptide 1	3727.94	3744.02	3816.59
Atp5d	ATP synthase, H+ transporting, mitochondrial F1 complex, delta subunit	2869.05	2953.39	3180.23
Atp5e	ATP synthase, H+ transporting, mitochondrial F1 complex, epsilon subunit	9074.08	9235.95	8226.41
Atp5f1	ATP synthase, H+ transporting, mitochondrial F0 complex, subunit B1	2061.97	2089.68	2086.66
Atp5g1	ATP synthase, H+ transporting, mitochondrial F0 complex, subunit c1 (subunit 9)	607.925	647.432	701.95
Atp5g2	ATP synthase, H+ transporting, mitochondrial F0 complex, subunit C2 (subunit 9)	86.3848	93.3888	80.123
Atp5g3	ATP synthase, H+ transporting, mitochondrial F0 complex, subunit C3 (subunit 9)	9495.73	8335.35	8123.31
Atp5h	ATP synthase, H+ transporting, mitochondrial F0 complex, subunit d	1853.14	1840.67	1847.12
Atp5j	ATP synthase, H+ transporting, mitochondrial F0 complex, subunit F	2940.1	4048.96	2754.72
Atp5j2	ATP synthase, H+ transporting, mitochondrial F0 complex, subunit F2	6033.99	5428.83	5303.87
Atp5k	ATP synthase, H+ transporting, mitochondrial F1F0 complex, subunit e	3082.32	2805.18	2569.43
Atp5l	ATP synthase, H+ transporting, mitochondrial F0 complex, subunit g	498.817	468.582	336.342
Atp5o	ATP synthase, H+ transporting, mitochondrial F1 complex, O subunit	3635.7	3693.82	4058.85
Atp5s	ATP synthase, H+ transporting, mitochondrial F0 complex, subunit s	338.25	298.536	399.605
Atp5sl	ATP5S-like	344.415	432.011	482.361
Atp6ap1	ATPase, H+ transporting, lysosomal accessory protein 1	4931.67	4165.37	5305.22
Atp6ap2	ATPase, H+ transporting, lysosomal accessory protein 2	2138.19	1182.39	2246.76
Atp6v0a1	ATPase, H+ transporting, lysosomal V0 subunit A1	843.754	744.871	890.106
Atp6v0a2	ATPase, H+ transporting, lysosomal V0 subunit A2	1314.3	955.925	1242.75
Atp6v0a4	ATPase, H+ transporting, lysosomal V0 subunit A4	1.58174	3.43593	35.0308
Atp6v0b	ATPase, H+ transporting, lysosomal V0 subunit B	2770.26	2205.21	3219.51
Atp6v0c	ATPase, H+ transporting, lysosomal V0 subunit C	0	0.590296	1.08657
Atp6v0d1	ATPase, H+ transporting, lysosomal V0 subunit D1	1162.41	1021.15	1496.98
Atp6v0d2	ATPase, H+ transporting, lysosomal V0 subunit D2	6.40043	18.4899	1.83949
Atp6v0e	ATPase, H+ transporting, lysosomal V0 subunit E	2380.79	2266.59	3469.3
Atp6v0e2	ATPase, H+ transporting, lysosomal V0 subunit E2	721.357	61.2317	302.219
Atp6v1a	ATPase, H+ transporting, lysosomal V1 subunit A	3250.11	2970.77	2828.25
Atp6v1b1	ATPase, H+ transporting, lysosomal V1 subunit B1	1.69957	5.26546	2.79165
Atp6v1b2	ATPase, H+ transporting, lysosomal V1 subunit B2	1309.26	878.36	1204.21
Atp6v1c1	ATPase, H+ transporting, lysosomal V1 subunit C1	1097.97	868.236	1179.34
Atp6v1c2	ATPase, H+ transporting, lysosomal V1 subunit C2	14.9314	19.038	13.6959
Atp6v1d	ATPase, H+ transporting, lysosomal V1 subunit D	3171.62	3297.9	3273.75
Atp6v1e1	ATPase, H+ transporting, lysosomal V1 subunit E1	2112.4	2129.27	2128.98
Atp6v1f	ATPase, H+ transporting, lysosomal V1 subunit F	1685.58	1498.18	1996.76
Atp6v1g1	ATPase, H+ transporting, lysosomal V1 subunit G1	1835.99	2317.54	2208.28
Atp6v1g2	ATPase, H+ transporting, lysosomal V1 subunit G2	725.129	348.888	242.136
Atp6v1g3	ATPase, H+ transporting, lysosomal V1 subunit G3	0	3.91474	0
Atp6v1h	ATPase, H+ transporting, lysosomal V1 subunit H	1467.38	1653.68	1794.14
Atp7a	ATPase, Cu++ transporting, alpha polypeptide	3646.22	1966.06	2285.63
Atp7b	ATPase, Cu++ transporting, beta polypeptide	1.62041	1.4722	0.607932
Atp8a1	ATPase, aminophospholipid transporter (APLT), class I, type 8A, member 1	5821.8	9891.88	9671.71
Atp8a2	ATPase, aminophospholipid transporter-like, class I, type 8A, member 2	312.259	51.5423	625.728
Atp8b1	ATPase, class I, type 8B, member 1	104.898	4070.21	72.4081
Atp8b2	ATPase, class I, type 8B, member 2	2097.28	2279.02	1959.75
Atp8b4	ATPase, class I, type 8B, member 4	2.32286	17.9161	0
Atp8b5	ATPase, class I, type 8B, member 5	63.3464	97.1219	32.4252
Atp9a	ATPase, class II, type 9A	1536.89	521.227	1188.69
Atp9b	ATPase, class II, type 9B	861.761	697.487	956.927
Atpaf1	ATP synthase mitochondrial F1 complex assembly factor 1	63.517	52.1108	44.5229
Atpaf2	ATP synthase mitochondrial F1 complex assembly factor 2	760.968	527.232	908.279
Atpbd4	NA	879.139	1227.85	1641.47
Atpif1	ATPase inhibitory factor 1	2975.45	2031.74	2667.66
Atr	ataxia telangiectasia and Rad3 related	792.867	763.478	724.741
Atrip	ATR interacting protein	610.098	1150.95	841.533
Atrn	attractin	1658.64	1815.13	2071.09
Atrnl1	attractin like 1	2943.49	1209.3	646.326
Atrx	alpha thalassemia/mental retardation syndrome X-linked homolog (human)	13590.4	15527.6	8849.85
Atxn1	ataxin 1	2254.24	4557.24	2477.38
Atxn10	ataxin 10	2033.12	1662.97	1981.72
Atxn1l	ataxin 1-like	798.56	804.27	974.642
Atxn2	ataxin 2	2849.64	2787.68	3724.84
Atxn2l	ataxin 2-like	508.123	612.366	666.661
Atxn3	ataxin 3	4595.39	5540.89	3298.26
Atxn7	ataxin 7	1660.45	2142.56	1671.82
Atxn7l1	ataxin 7-like 1	491.929	694.276	348.758
Atxn7l2	ataxin 7-like 2	73.9517	75.908	92.8027
Atxn7l3	ataxin 7-like 3	562.79	481.782	426.313
Atxn7l3b	ataxin 7-like 3B	4540.65	4840.08	4254.25
Auh	AU RNA binding protein/enoyl-coenzyme A hydratase	489.306	669.576	642.709
Aup1	ancient ubiquitous protein 1	1255.07	1722.12	1390.23
Aurka	aurora kinase A	57.9839	80.6619	82.356
Aurkaip1	aurora kinase A interacting protein 1	1662.81	1761.93	1591.18
Aurkb	aurora kinase B	83.25	65.8739	35.0914
Auts2	autism susceptibility candidate 2	194.023	198.687	25.9631
Aven	apoptosis, caspase activation inhibitor	211.948	157.504	176.595
Avil	advillin	22.2155	62.4356	50.9745
Avl9	AVL9 homolog (S. cerevisiase)	1053.27	1107.66	1032.87
Avpi1	arginine vasopressin-induced 1	313.294	366.509	462.592
Avpr1a	arginine vasopressin receptor 1A	142.679	37.1166	7.92093
Awat2	acyl-CoA wax alcohol acyltransferase 2	7.84332	13.1879	5.93098
Axin1	axin 1	312.962	322.372	313.945
Axin2	axin2	147.683	117.938	96.89
Axl	AXL receptor tyrosine kinase	1209.36	1891.39	1267.79
Azgp1	alpha-2-glycoprotein 1, zinc	20.2384	69.3794	3.9359
Azi1	5-azacytidine induced gene 1	93.6382	65.1102	70.5775
Azi2	5-azacytidine induced gene 2	1586.57	1473.6	1892.17
Azin1	antizyme inhibitor 1	3612.82	3674.55	2998.56
B2m	beta-2 microglobulin	477796	450780	69619.5
B3galnt1	UDP-GalNAc:betaGlcNAc beta 1,3-galactosaminyltransferase, polypeptide 1	132.445	122.805	223.29
B3galnt2	UDP-GalNAc:betaGlcNAc beta 1,3-galactosaminyltransferase, polypeptide 2	749.266	616.772	744.185
B3galt1	UDP-Gal:betaGlcNAc beta 1,3-galactosyltransferase, polypeptide 1	352.073	41.2289	3.12362
B3galt2	UDP-Gal:betaGlcNAc beta 1,3-galactosyltransferase, polypeptide 2	140.599	103.597	81.7272
B3galt4	UDP-Gal:betaGlcNAc beta 1,3-galactosyltransferase, polypeptide 4	49.7083	63.7415	24.8646
B3galt5	UDP-Gal:betaGlcNAc beta 1,3-galactosyltransferase, polypeptide 5	17.1725	70.0572	0
B3galt6	UDP-Gal:betaGal beta 1,3-galactosyltransferase, polypeptide 6	403.664	338.035	330.787
B3galtl	beta 1,3-galactosyltransferase-like	1153.92	553.622	1073.41
B3gat2	beta-1,3-glucuronyltransferase 2 (glucuronosyltransferase S)	213.29	232.133	199.897
B3gat3	beta-1,3-glucuronyltransferase 3 (glucuronosyltransferase I)	1071.96	1101.65	1157.36
B3gnt1	UDP-GlcNAc:betaGal beta-1,3-N-acetylglucosaminyltransferase 1	1012.24	841.424	1319.2
B3gnt2	UDP-GlcNAc:betaGal beta-1,3-N-acetylglucosaminyltransferase 2	6531.39	13110.8	14066.5
B3gnt3	UDP-GlcNAc:betaGal beta-1,3-N-acetylglucosaminyltransferase 3	275.879	1563.73	85.3175
B3gnt4	UDP-GlcNAc:betaGal beta-1,3-N-acetylglucosaminyltransferase 4	2.78605	0.948544	0.607932
B3gnt5	UDP-GlcNAc:betaGal beta-1,3-N-acetylglucosaminyltransferase 5	12.669	155.548	216.441
B3gnt6	UDP-GlcNAc:betaGal beta-1,3-N-acetylglucosaminyltransferase 6 (core 3 synthase)	18.8694	36.1131	4.85667
B3gnt7	UDP-GlcNAc:betaGal beta-1,3-N-acetylglucosaminyltransferase 7	64.283	8.11673	57.1855
B3gnt8	UDP-GlcNAc:betaGal beta-1,3-N-acetylglucosaminyltransferase 8	65.0846	15.9102	582.73
B3gnt9-ps	NA	74.9904	17.2671	37.6957
B3gntl1	UDP-GlcNAc:betaGal beta-1,3-N-acetylglucosaminyltransferase-like 1	200.578	201.689	226.939
B4galnt1	beta-1,4-N-acetyl-galactosaminyl transferase 1	30.5856	174.829	20.8462
B4galnt2	beta-1,4-N-acetyl-galactosaminyl transferase 2	27.7024	95.7728	5.83643
B4galnt3	beta-1,4-N-acetyl-galactosaminyl transferase 3	0.937482	2.36972	0.333644
B4galnt4	beta-1,4-N-acetyl-galactosaminyl transferase 4	0.279371	0.293967	13.015
B4galt1	UDP-Gal:betaGlcNAc beta 1,4- galactosyltransferase, polypeptide 1	8817.07	7302.15	14230.9
B4galt2	UDP-Gal:betaGlcNAc beta 1,4- galactosyltransferase, polypeptide 2	107.798	41.6004	172.696
B4galt3	UDP-Gal:betaGlcNAc beta 1,4-galactosyltransferase, polypeptide 3	613.679	663.461	717.581
B4galt4	UDP-Gal:betaGlcNAc beta 1,4-galactosyltransferase, polypeptide 4	587.709	3441.38	822.482
B4galt5	UDP-Gal:betaGlcNAc beta 1,4-galactosyltransferase, polypeptide 5	2760.79	1136	2754.92
B4galt6	UDP-Gal:betaGlcNAc beta 1,4-galactosyltransferase, polypeptide 6	8864.05	3834.7	2147.28
B4galt7	xylosylprotein beta1,4-galactosyltransferase, polypeptide 7 (galactosyltransferase I)	149.774	160.977	167.754
B9d1	B9 protein domain 1	292.468	258.161	372.463
B9d2	B9 protein domain 2	368.803	242.634	480.08
Baalc	brain and acute leukemia, cytoplasmic	2.97474	1.89473	1.15651
Baat	bile acid-Coenzyme A: amino acid N-acyltransferase	1.67925	1.53884	4.17368
Baat1	NA	521.098	527.777	516.826
Bace1	beta-site APP cleaving enzyme 1	1910.55	1363.25	1338.76
Bace2	beta-site APP-cleaving enzyme 2	1597.18	4917.53	194.789
Bach1	BTB and CNC homology 1	1084.41	1024.74	1080.76
Bach2	BTB and CNC homology 2	1438.29	2392.66	976.924
Bad	BCL2-associated agonist of cell death	528.859	528.821	489.92
Bag1	BCL2-associated athanogene 1	1861.06	1960.82	2317.91
Bag2	BCL2-associated athanogene 2	104.636	71.8885	54.7429
Bag3	BCL2-associated athanogene 3	911.138	1745.9	2672.65
Bag4	BCL2-associated athanogene 4	938.963	1062.17	1011.44
Bag5	BCL2-associated athanogene 5	547.192	936.68	1206.76
Bag6	BCL2-associated athanogene 6	4877.62	5041.85	4948.75
Bahcc1	BAH domain and coiled-coil containing 1	370.545	446.194	313.695
Bahd1	bromo adjacent homology domain containing 1	1674.34	1901.65	1417.02
Bai1	brain-specific angiogenesis inhibitor 1	1.24151	0	0.838563
Bai2	brain-specific angiogenesis inhibitor 2	0.58975	0.296329	1.02721
Bai3	brain-specific angiogenesis inhibitor 3	22.546	4.3703	0
Baiap2	brain-specific angiogenesis inhibitor 1-associated protein 2	428.184	1114.72	646.41
Baiap2l1	BAI1-associated protein 2-like 1	231.5	209.122	153.297
Baiap2l2	BAI1-associated protein 2-like 2	0.475729	2.42074	0.419282
Baiap3	BAI1-associated protein 3	0.775946	2.13386	0.333644
Bak1	BCL2-antagonist/killer 1	483.579	533.433	319.875
Bambi	BMP and activin membrane-bound inhibitor	1269.13	1638.38	722.634
Bambi-ps1	BMP and activin membrane-bound inhibitor, pseudogene (Xenopus laevis)	1.69576	38.5779	0.548577
Banf1	barrier to autointegration factor 1	2302.59	2492.06	3042.88
Bank1	B cell scaffold protein with ankyrin repeats 1	30.5451	245.851	8.30502
Banp	BTG3 associated nuclear protein	396.097	451.542	432.454
Bap1	Brca1 associated protein 1	553.431	661.354	710.595
Bard1	BRCA1 associated RING domain 1	90.6167	61.1203	133.302
Barhl1	BarH-like 1 (Drosophila)	1.31384	0.590296	2.94723
Barx1	BarH-like homeobox 1	0.155189	1.2997	1.85008
Barx2	BarH-like homeobox 2	36.121	92.3	6.46218
Basp1	brain abundant, membrane attached signal protein 1	66.9982	59.7702	86.3889
Batf	basic leucine zipper transcription factor, ATF-like	124.953	42.1604	25.2403
Batf2	basic leucine zipper transcription factor, ATF-like 2	241.093	180.619	36.7367
Batf3	basic leucine zipper transcription factor, ATF-like 3	35.819	12.6539	21.928
Bax	BCL2-associated X protein	877.321	703.072	654.019
Baz1a	bromodomain adjacent to zinc finger domain 1A	1244.23	1680.47	493.944
Baz1b	bromodomain adjacent to zinc finger domain, 1B	5318	5454.58	5523.79
Baz2a	bromodomain adjacent to zinc finger domain, 2A	3611.45	4399	3892.17
Baz2b	bromodomain adjacent to zinc finger domain, 2B	4805.3	5955.52	3866.49
Bbc3	BCL2 binding component 3	47.0658	63.0444	60.5322
Bbip1	BBSome interacting protein 1	589.172	802.331	811.093
Bbox1	butyrobetaine (gamma), 2-oxoglutarate dioxygenase 1 (gamma-butyrobetaine hydroxylase)	1.74391	1.65559	4.04782
Bbs1	Bardet-Biedl syndrome 1 (human)	327.329	206.088	396.45
Bbs10	Bardet-Biedl syndrome 10 (human)	187.721	152.122	106.913
Bbs12	Bardet-Biedl syndrome 12 (human)	240.677	299.137	267.425
Bbs2	Bardet-Biedl syndrome 2 (human)	315.183	323.798	506.493
Bbs4	Bardet-Biedl syndrome 4 (human)	151.332	225.8	186.782
Bbs5	Bardet-Biedl syndrome 5 (human)	338.797	199.704	262.581
Bbs7	Bardet-Biedl syndrome 7 (human)	182.362	166.952	187.386
Bbs9	Bardet-Biedl syndrome 9 (human)	231.662	243.708	315.818
Bbx	bobby sox homolog (Drosophila)	7960.13	6930.91	7430.45
Bcam	basal cell adhesion molecule	666.415	3596.49	368.636
Bcan	brevican	109.976	7.11153	0
Bcap29	B cell receptor associated protein 29	519.067	476.53	480.556
Bcap31	B cell receptor associated protein 31	3156.74	3128.98	4764.52
Bcar1	breast cancer anti-estrogen resistance 1	1186.98	1292.31	1425.92
Bcar3	breast cancer anti-estrogen resistance 3	3322.35	368.008	296.649
Bcas1	breast carcinoma amplified sequence 1	3.6747	3.37401	15.833
Bcas2	breast carcinoma amplified sequence 2	1912.09	1911.66	2168.78
Bcas3	breast carcinoma amplified sequence 3	390.211	421.369	511.669
Bcat1	branched chain aminotransferase 1, cytosolic	22.5268	42.4851	11.2595
Bcat2	branched chain aminotransferase 2, mitochondrial	388.105	355.187	317.617
Bccip	BRCA2 and CDKN1A interacting protein	602.621	589.562	684.005
Bcdin3d	BCDIN3 domain containing	104.313	143.053	190.523
Bche	butyrylcholinesterase	98.9207	228.242	14.3568
Bckdha	branched chain ketoacid dehydrogenase E1, alpha polypeptide	186.056	222.559	229.265
Bckdhb	branched chain ketoacid dehydrogenase E1, beta polypeptide	477.957	603.153	489.326
Bckdk	branched chain ketoacid dehydrogenase kinase	313.065	287.85	286.303
Bcl10	B cell leukemia/lymphoma 10	9612.06	8806.53	6004.69
Bcl11a	B cell CLL/lymphoma 11A (zinc finger protein)	87.8184	110.178	119.829
Bcl11b	B cell leukemia/lymphoma 11B	10.2021	125.752	3.48355
Bcl2	B cell leukemia/lymphoma 2	514.674	647.542	608.059
Bcl2a1a	B cell leukemia/lymphoma 2 related protein A1a	2.95827	3.00159	0.838563
Bcl2a1b	B cell leukemia/lymphoma 2 related protein A1b	10.4021	13.6048	2.60979
Bcl2a1d	B cell leukemia/lymphoma 2 related protein A1d	3.3168	4.36793	0.752925
Bcl2l1	BCL2-like 1	2832.2	2403.41	3188.93
Bcl2l10	Bcl2-like 10	0.910289	1.36162	0.419282
Bcl2l11	BCL2-like 11 (apoptosis facilitator)	2405.88	1639.23	1235.86
Bcl2l12	BCL2-like 12 (proline rich)	551.147	522.373	586.242
Bcl2l13	BCL2-like 13 (apoptosis facilitator)	1240.96	830.603	715.407
Bcl2l14	BCL2-like 14 (apoptosis facilitator)	2.30699	12.8278	4.4425
Bcl2l15	BCLl2-like 15	11.5524	14.0869	2.55044
Bcl2l2	BCL2-like 2	1370.23	1080.32	1948.97
Bcl3	B cell leukemia/lymphoma 3	2472.88	1729.93	542.104
Bcl6	B cell leukemia/lymphoma 6	775.798	320.07	688.365
Bcl6b	B cell CLL/lymphoma 6, member B	2096.5	6082.52	7568.1
Bcl7a	B cell CLL/lymphoma 7A	564.855	305.017	351.849
Bcl7b	B cell CLL/lymphoma 7B	868.792	894.158	1172.72
Bcl7c	B cell CLL/lymphoma 7C	52.2841	72.8442	91.5521
Bcl9	B cell CLL/lymphoma 9	45.2793	22.8137	22.9641
Bcl9l	B cell CLL/lymphoma 9-like	294.185	311.847	247.207
Bclaf1	BCL2-associated transcription factor 1	10528	11792.4	7554.64
Bcmo1	beta-carotene 15,15'-monooxygenase	0.744939	1.18059	0
Bco2	beta-carotene oxygenase 2	1.02431	2.66605	0.607932
Bcor	BCL6 interacting corepressor	1435.72	1439.63	1646.91
Bcorl1	BCL6 co-repressor-like 1	126.032	124.693	169.493
Bcr	breakpoint cluster region	3274.54	1688.15	11330.9
Bcs1l	BCS1-like (yeast)	388.313	425.546	408.175
Bdh1	3-hydroxybutyrate dehydrogenase, type 1	3.11595	4.20725	40.7897
Bdh2	3-hydroxybutyrate dehydrogenase, type 2	5.40973	12.0925	6.47611
Bdkrb1	bradykinin receptor, beta 1	46.6946	18.839	3.31395
Bdkrb2	bradykinin receptor, beta 2	0	3.54178	0.274288
Bdnf	brain derived neurotrophic factor	2.95072	8.00052	23.7399
Bdp1	B double prime 1, subunit of RNA polymerase III transcription initiation factor IIIB	3391.01	3689.6	3298.68
Bean1	brain expressed, associated with Nedd4, 1	3.21664	14.0618	201.9
Becn1	beclin 1, autophagy related	656.11	688.211	646.626
Begain	brain-enriched guanylate kinase-associated	4.20609	15.0387	3.51662
Bend3	BEN domain containing 3	1013.83	753.268	940.397
Bend4	BEN domain containing 4	2448.07	3780.69	252.224
Bend5	BEN domain containing 5	576.857	652.365	64.1908
Bend6	BEN domain containing 6	22.0406	10.9236	48.2493
Bend7	BEN domain containing 7	292.528	451.821	170.263
Best1	bestrophin 1	166.164	183.303	164.242
Best2	bestrophin 2	0.475729	0.71177	4.14193
Best3	bestrophin 3	15.3806	4.97149	1.25785
Bet1	blocked early in transport 1 homolog (S. cerevisiae)	2156.29	2133.99	2654.07
Bet1l	blocked early in transport 1 homolog (S. cerevisiae)-like	486.518	641.803	474.551
Beta-s	NA	35.0316	547.058	10.1814
Bex1	brain expressed gene 1	0.32054	0	7.22225
Bex2	brain expressed X-linked 2	1.30686	3.00631	6.79582
Bex4	brain expressed gene 4	0.558743	3.20297	3.45215
Bfar	bifunctional apoptosis regulator	2216.76	1617.71	1445.84
Bfsp1	beaded filament structural protein 1, in lens-CP94	12.2973	7.75284	39.7175
Bfsp2	beaded filament structural protein 2, phakinin	1.68242	2.36355	0.419282
Bglap	bone gamma carboxyglutamate protein	20.8471	51.1008	3.63022
Bglap2	bone gamma-carboxyglutamate protein 2	27.2584	54.532	0.822865
Bglap-rs1	NA	379.731	947.735	0.333644
Bgn	biglycan	3157.98	1715.75	2851.05
Bhlha15	basic helix-loop-helix family, member a15	125.215	428.748	15.2581
Bhlhb9	basic helix-loop-helix domain containing, class B9	294.544	176.547	258.215
Bhlhe22	basic helix-loop-helix family, member e22	6.0053	6.20783	2.79165
Bhlhe40	basic helix-loop-helix family, member e40	1533.19	1968.03	5228.74
Bhlhe41	basic helix-loop-helix family, member e41	1.06548	7.79677	2.51737
Bhmt	betaine-homocysteine methyltransferase	1.4094	0	4.28013
Bicc1	bicaudal C homolog 1 (Drosophila)	132.267	97.6603	59.3151
Bicd1	bicaudal D homolog 1 (Drosophila)	177.216	70.3162	357.385
Bicd2	bicaudal D homolog 2 (Drosophila)	1443.74	1979.59	3535.99
Bid	BH3 interacting domain death agonist	249.063	154.327	95.627
Bik	BCL2-interacting killer	444.657	329.48	962.081
Bin1	bridging integrator 1	2803.76	792	1126.44
Bin3	bridging integrator 3	507.659	558.944	445.031
Birc2	baculoviral IAP repeat-containing 2	11327.2	4694.26	1182.92
Birc3	baculoviral IAP repeat-containing 3	1977	1417.94	279.932
Birc5	baculoviral IAP repeat-containing 5	196.344	190.676	145.231
Birc6	baculoviral IAP repeat-containing 6	8346.71	10582.8	7444.38
Bivm	basic, immunoglobulin-like variable motif containing	544.039	419.597	396.678
Blcap	bladder cancer associated protein homolog (human)	859.014	588.191	467.967
Blk	B lymphoid kinase	10.6276	55.0628	1.67713
Blm	Bloom syndrome, RecQ helicase-like	119.887	118.41	88.7748
Blmh	bleomycin hydrolase	818.115	865.013	741.194
Blnk	B cell linker	67.5158	63.482	4.09148
Bloc1s1	biogenesis of lysosome-related organelles complex-1, subunit 1	1895.15	1861.21	2096.15
Bloc1s2	biogenesis of lysosome-related organelles complex-1, subunit 2	310.487	332.543	330.562
Bloc1s3	biogenesis of lysosome-related organelles complex-1, subunit 3	89.7769	85.9734	93.208
Blvra	biliverdin reductase A	630.292	602.639	792.32
Blvrb	biliverdin reductase B (flavin reductase (NADPH))	677.584	321.271	778.486
Blzf1	basic leucine zipper nuclear factor 1	624.301	638.26	750.414
Bmf	BCL2 modifying factor	308.059	743.344	377.334
Bmi1	Bmi1 polycomb ring finger oncogene	2165.77	1812.95	4018.61
Bmp1	bone morphogenetic protein 1	669.973	902.335	2969.91
Bmp15	bone morphogenetic protein 15	0.910289	38.6175	1.25785
Bmp2	bone morphogenetic protein 2	9071.64	408.873	12.2393
Bmp2k	BMP2 inducible kinase	1352.3	346.664	2748.58
Bmp3	bone morphogenetic protein 3	207.87	27.4388	23.9989
Bmp4	bone morphogenetic protein 4	934.034	382.095	494.481
Bmp5	bone morphogenetic protein 5	2.56552	11.0611	2.84043
Bmp6	bone morphogenetic protein 6	123.184	258.518	102.662
Bmp7	bone morphogenetic protein 7	40.4492	1.0081	17.1654
Bmp8a	bone morphogenetic protein 8a	819.173	14.6966	0.419282
Bmper	BMP-binding endothelial regulator	42.6974	61.4296	15.992
Bmpr1a	bone morphogenetic protein receptor, type 1A	376.373	957.191	462.592
Bmpr1b	bone morphogenetic protein receptor, type 1B	12.7395	7.62428	15.9533
Bmpr2	bone morphogenetic protein receptor, type II (serine/threonine kinase)	2286.9	4345.73	2294.86
Bms1	BMS1 homolog, ribosome assembly protein (yeast)	1119.92	1162.18	1187.75
Bmx	BMX non-receptor tyrosine kinase	1781.26	427.99	2614.99
Bmyc	brain expressed myelocytomatosis oncogene	752.552	539.866	869.537
Bnc1	basonuclin 1	7.5762	3.73226	191.464
Bnc2	basonuclin 2	41.975	50.8186	34.9431
Bnip1	BCL2/adenovirus E1B interacting protein 1	242.127	248.497	251.415
Bnip2	BCL2/adenovirus E1B interacting protein 2	6843.58	5756.2	6291.58
Bnip3	BCL2/adenovirus E1B interacting protein 3	641.301	820.734	744.291
Bnip3l	BCL2/adenovirus E1B interacting protein 3-like	5433.06	5335.78	3609.52
Bnipl	BCL2/adenovirus E1B 19kD interacting protein like	14.5797	18.744	22.5042
Boc	biregional cell adhesion molecule-related/down-regulated by oncogenes (Cdon) binding protein	200.671	261.176	544.286
Bod1	biorientation of chromosomes in cell division 1	843.298	832.639	1035.5
Bod1l	biorientation of chromosomes in cell division 1-like	5451.65	5380.23	6373.18
Bok	BCL2-related ovarian killer protein	9825.83	2377.82	3954.73
Bola1	bolA-like 1 (E. coli)	167.694	173.98	171.184
Bola2	bolA-like 2 (E. coli)	487.395	738.364	497.799
Bola3	bolA-like 3 (E. coli)	484.582	573.503	575.938
Boll	bol, boule-like (Drosophila)	2.99944	2.95148	1.3015
Bop1	block of proliferation 1	608.866	742.535	626.255
Bpgm	2,3-bisphosphoglycerate mutase	817.944	509.909	784.113
Bphl	biphenyl hydrolase-like (serine hydrolase, breast epithelial mucin-associated antigen)	702.851	590.004	730.14
Bpifa2	BPI fold containing family A, member 2	725459	1.64586e+06	2729.5
Bpifa6	BPI fold containing family A, member 6	6.3091	6.16771	0
Bpifb1	BPI fold containing family B, member 1	8.13281	18.4949	0
Bpifb2	BPI fold containing family B, member 2	4.79652	8.48819	0
Bpifb3	BPI fold containing family B, member 3	9.69389	4.37883	0
Bpifb5	BPI fold containing family B, member 5	43.3842	1023.82	2.09641
Bpifb9a	BPI fold containing family B, member 9A	1.18585	2.1315	0.274288
Bpifb9b	BPI fold containing family B, member 9B	1.03447	0.355885	1.00093
Bpnt1	bisphosphate 3'-nucleotidase 1	8771.57	10192.9	11036.6
Bptf	bromodomain PHD finger transcription factor	6168.17	6366.74	6394.04
Braf	Braf transforming gene	3209.34	3802.96	3587.01
Brap	BRCA1 associated protein	2780.13	3031.09	3679.66
Brca1	breast cancer 1	81.0389	70.1294	22.6144
Brca2	breast cancer 2	352.825	275.133	266.538
Brcc3	BRCA1/BRCA2-containing complex, subunit 3	2005.81	1507.84	1464.32
Brd1	bromodomain containing 1	5970.22	5407.6	5802.35
Brd2	bromodomain containing 2	4079.84	4465.98	4016.97
Brd3	bromodomain containing 3	6285.07	4330.05	5469.27
Brd4	bromodomain containing 4	7536.1	8528.61	7289.67
Brd7	bromodomain containing 7	1261.53	1261.48	1550.1
Brd8	bromodomain containing 8	1890.68	2575.82	2414.26
Brd9	bromodomain containing 9	3924.9	4051.38	4781.58
Brdt	bromodomain, testis-specific	202.625	204.825	208.737
Bre	brain and reproductive organ-expressed protein	469.296	595.603	519.955
Brf1	BRF1 homolog, subunit of RNA polymerase III transcription initiation factor IIIB (S. cerevisiae)	655.663	771.018	775.966
Brf2	BRF2, subunit of RNA polymerase III transcription initiation factor, BRF1-like	74.1418	53.2796	151.459
Bri3	brain protein I3	1574.65	927.577	1005.19
Bri3bp	Bri3 binding protein	387.528	171.209	235.976
Brip1	BRCA1 interacting protein C-terminal helicase 1	73.7651	150.591	32.357
Brix1	BRX1, biogenesis of ribosomes, homolog (S. cerevisiae)	1362.26	1447.24	1336.92
Brms1	breast cancer metastasis-suppressor 1	423.112	549.408	512.001
Brms1l	breast cancer metastasis-suppressor 1-like	744.971	776.331	866.077
Brp44	NA	1966.58	1457.45	2189.2
Brp44l	NA	149.911	107.275	98.2114
Brpf1	bromodomain and PHD finger containing, 1	389.82	457.606	413.788
Brpf3	bromodomain and PHD finger containing, 3	1567.89	1064.78	1431.68
Brsk1	BR serine/threonine kinase 1	18.3925	4.79991	6.05516
Brsk2	BR serine/threonine kinase 2	60.1821	135.575	122.737
Brwd1	bromodomain and WD repeat domain containing 1	2391.31	2380.37	1676.6
Brwd3	bromodomain and WD repeat domain containing 3	440.222	594.162	416.235
Bscl2	Bernardinelli-Seip congenital lipodystrophy 2 homolog (human)	1090.8	785.29	985.209
Bsdc1	BSD domain containing 1	852.168	1124.95	1360.93
Bsg	basigin	5512.74	7773.77	5955.29
Bsn	bassoon	5.55423	7.16727	0
Bsnd	Bartter syndrome, infantile, with sensorineural deafness (Barttin)	0.592923	4.74272	0
Bspry	B-box and SPRY domain containing	12.7805	17.8948	9.54717
Bst1	bone marrow stromal cell antigen 1	2490.42	3564.51	41.353
Bst2	bone marrow stromal cell antigen 2	4253.22	3560.13	1387.66
Btaf1	BTAF1 RNA polymerase II, B-TFIID transcription factor-associated, (Mot1 homolog, S. cerevisiae)	1560.23	1643.91	1732.65
Btbd1	BTB (POZ) domain containing 1	2402.59	2363.85	2133.43
Btbd10	BTB (POZ) domain containing 10	387.7	363.526	462.575
Btbd11	BTB (POZ) domain containing 11	5059.13	1964.04	178.381
Btbd16	BTB (POZ) domain containing 16	1.91625	25.1603	0.274288
Btbd17	BTB (POZ) domain containing 17	0	0.355885	2.47371
Btbd19	BTB (POZ) domain containing 19	134.373	808.528	327.32
Btbd2	BTB (POZ) domain containing 2	1009.2	1001.08	1332.55
Btbd3	BTB (POZ) domain containing 3	1788.7	1856.49	6159.15
Btbd6	BTB (POZ) domain containing 6	128.247	160.386	132.237
Btbd7	BTB (POZ) domain containing 7	636.159	694.187	618.84
Btbd8	BTB (POZ) domain containing 8	52.0154	37.0707	38.2459
Btbd9	BTB (POZ) domain containing 9	779.279	701.265	523.116
Btc	betacellulin, epidermal growth factor family member	15.3042	13.9876	5.65836
Btd	biotinidase	640.013	536.145	347.058
Btf3	basic transcription factor 3	2544.75	2655.41	2917.67
Btf3l4	basic transcription factor 3-like 4	1174.72	1228.75	1353.56
Btg1	B cell translocation gene 1, anti-proliferative	34187.6	43021.8	21584.3
Btg2	B cell translocation gene 2, anti-proliferative	1408.02	5763.42	13114.1
Btg4	B cell translocation gene 4	0.279371	2.31017	0
Btk	Bruton agammaglobulinemia tyrosine kinase	2.49953	20.4383	0
Btla	B and T lymphocyte associated	23.5236	236.452	6.37822
Btn1a1	butyrophilin, subfamily 1, member A1	0	0.355885	5.83511
Btnl2	butyrophilin-like 2	2.60287	0.296329	0.333644
Btnl3	NA	0	2.0162	0.838563
Btnl5	NA	0	0.293967	2.32872
Btnl9	butyrophilin-like 9	2105.61	4872.67	2644.41
Btrc	beta-transducin repeat containing protein	1060.39	1140.35	1073.42
Bub1	budding uninhibited by benzimidazoles 1 homolog (S. cerevisiae)	59.977	60.4619	36.3802
Bub1b	budding uninhibited by benzimidazoles 1 homolog, beta (S. cerevisiae)	282.465	103.23	87.6702
Bub3	budding uninhibited by benzimidazoles 3 homolog (S. cerevisiae)	3542.97	3703.69	5117.56
Bud13	BUD13 homolog (yeast)	227.796	200.734	236.729
Bud31	BUD31 homolog (yeast)	2110.3	2198.23	1955.05
Butr1	NA	1.62422	1.65795	2.09808
Bves	blood vessel epicardial substance	1.11681	0.888988	1.15651
Bysl	bystin-like	356.826	511.433	545.005
Bzw1	basic leucine zipper and W2 domains 1	1924.59	2137.67	2858.91
Bzw2	basic leucine zipper and W2 domains 2	442.301	592.296	681.63
C1d	C1D nuclear receptor co-repressor	4204.14	3792.95	4644.28
C1galt1	core 1 synthase, glycoprotein-N-acetylgalactosamine 3-beta-galactosyltransferase, 1	393.615	477.314	218.568
C1galt1c1	C1GALT1-specific chaperone 1	491.874	626.771	589.645
C1qa	complement component 1, q subcomponent, alpha polypeptide	5.68649	1.59603	5.39086
C1qb	complement component 1, q subcomponent, beta polypeptide	58.4659	19.6368	43.6895
C1qbp	complement component 1, q subcomponent binding protein	750.361	702.101	822.357
C1qc	complement component 1, q subcomponent, C chain	28.2744	10.4794	16.6254
C1ql2	complement component 1, q subcomponent-like 2	725.767	19.015	0
C1ql3	C1q-like 3	658.886	188.983	17.3876
C1qtnf1	C1q and tumor necrosis factor related protein 1	164.672	3397.46	344.569
C1qtnf2	C1q and tumor necrosis factor related protein 2	51.8989	62.3699	100.362
C1qtnf3	C1q and tumor necrosis factor related protein 3	14.0076	15.9362	26.5494
C1qtnf4	C1q and tumor necrosis factor related protein 4	4.64716	4.55605	5.57273
C1qtnf6	C1q and tumor necrosis factor related protein 6	1715.92	698.743	930.205
C1qtnf7	C1q and tumor necrosis factor related protein 7	1651.7	57.5383	48.1425
C1qtnf9	C1q and tumor necrosis factor related protein 9	49.889	3465.44	18.1812
C1ra	complement component 1, r subcomponent A	1577.7	1649.69	345.673
C1rb	complement component 1, r subcomponent B	1.65141	4.61561	0.419282
C1rl	complement component 1, r subcomponent-like	202.4	416.571	20.2933
C1s	complement component 1, s subcomponent	1012.27	5090.43	462.636
C2	complement component 2 (within H-2S)	6562.05	394.559	386.775
C2cd2	C2 calcium-dependent domain containing 2	2651.95	3976.03	1711.56
C2cd2l	C2 calcium-dependent domain containing 2-like	329.048	651.426	529.155
C2cd3	C2 calcium-dependent domain containing 3	592.211	813.859	815.594
C2cd4a	C2 calcium-dependent domain containing 4A	0.465567	1.06766	0.667287
C2cd4b	C2 calcium-dependent domain containing 4B	3.47898	1.36398	32.789
C2cd4c	C2 calcium-dependent domain containing 4C	0	0	1.42021
C2cd4d	C2 calcium-dependent domain containing 4D	0.634092	2.72324	0.607932
C3	complement component 3	32434.3	4059.57	4755.21
C3ar1	complement component 3a receptor 1	113.122	172.728	227.994
C4a	complement component 4A (Rodgers blood group)	14.1964	20.8874	13.4326
C4b	complement component 4B (Chido blood group)	356.305	425.677	204.991
C4bp	complement component 4 binding protein	0.279371	1.17587	1.38714
C4bp-ps1	NA	7.76628	8.87571	4.29751
C5ar1	complement component 5a receptor 1	116.502	14.7986	13.6993
C6	complement component 6	7.88714	5.0405	2.25366
C7	complement component 7	6.78235	7.32887	2.39866
C8g	complement component 8, gamma polypeptide	83.4556	66.4184	12.6483
C9	complement component 9	2.55853	7.38987	4.63794
Cab39	calcium binding protein 39	6559.44	8146.14	7932.52
Cab39l	calcium binding protein 39-like	1484.11	1572.13	1595.09
Cabin1	calcineurin binding protein 1	1011.22	1160.23	1182.94
Cables1	CDK5 and Abl enzyme substrate 1	196.18	183.944	308.795
Cables2	CDK5 and Abl enzyme substrate 2	1281.91	3322.18	2869.4
Cabp1	calcium binding protein 1	1.52406	23.4631	13.0096
Cabp2	calcium binding protein 2	0.279371	3.20297	0
Cabp4	calcium binding protein 4	12.7554	4.97004	3.70016
Cabyr	calcium-binding tyrosine-(Y)-phosphorylation regulated (fibrousheathin 2)	23.6692	44.6336	43.8908
Cachd1	cache domain containing 1	274.567	160.725	232.588
Cacna1a	calcium channel, voltage-dependent, P/Q type, alpha 1A subunit	220.661	35.5286	48.1654
Cacna1b	calcium channel, voltage-dependent, N type, alpha 1B subunit	20.8927	1.47456	0
Cacna1c	calcium channel, voltage-dependent, L type, alpha 1C subunit	50.4904	99.3362	17.653
Cacna1d	calcium channel, voltage-dependent, L type, alpha 1D subunit	17.2675	15.016	8.03964
Cacna1e	calcium channel, voltage-dependent, R type, alpha 1E subunit	6.50561	9.74016	252.827
Cacna1f	calcium channel, voltage-dependent, alpha 1F subunit	108.471	2.07339	0
Cacna1g	calcium channel, voltage-dependent, T type, alpha 1G subunit	2.95875	12.4266	8.60903
Cacna1h	calcium channel, voltage-dependent, T type, alpha 1H subunit	9.12623	18.6798	0
Cacna1i	calcium channel, voltage-dependent, alpha 1I subunit	3.41946	25.5147	14.0703
Cacna1s	calcium channel, voltage-dependent, L type, alpha 1S subunit	0	0.592659	5.78766
Cacna2d1	calcium channel, voltage-dependent, alpha2/delta subunit 1	792.465	175.916	2111.03
Cacna2d2	calcium channel, voltage-dependent, alpha 2/delta subunit 2	30.4051	60.8199	2.3393
Cacna2d3	calcium channel, voltage-dependent, alpha2/delta subunit 3	53.7279	6.21492	55.7188
Cacna2d4	calcium channel, voltage-dependent, alpha 2/delta subunit 4	26.6864	18.2086	2.25366
Cacnb1	calcium channel, voltage-dependent, beta 1 subunit	25.2565	17.3205	26.0246
Cacnb2	calcium channel, voltage-dependent, beta 2 subunit	4.03058	22.5462	13.1164
Cacnb3	calcium channel, voltage-dependent, beta 3 subunit	194.944	157.992	98.1949
Cacnb4	calcium channel, voltage-dependent, beta 4 subunit	116.4	141.104	122.346
Cacng1	calcium channel, voltage-dependent, gamma subunit 1	75.3926	50.9295	65.9947
Cacng4	calcium channel, voltage-dependent, gamma subunit 4	50.5532	10.9387	9.20973
Cacng7	calcium channel, voltage-dependent, gamma subunit 7	0.313552	1.24015	0
Cacng8	calcium channel, voltage-dependent, gamma subunit 8	0	1.76616	0
Cacybp	calcyclin binding protein	1031.42	951.375	987.817
Cad	carbamoyl-phosphate synthetase 2, aspartate transcarbamylase, and dihydroorotase	579.669	656.502	693.707
Cadm1	cell adhesion molecule 1	53.613	479.591	77.5352
Cadm2	cell adhesion molecule 2	11.8335	4.80136	2.05443
Cadm3	cell adhesion molecule 3	21.2072	194.503	11.6767
Cadm4	cell adhesion molecule 4	16.7733	7.3374	12.1396
Cadps	Ca2+-dependent secretion activator	166.206	5.10005	0
Cadps2	Ca2+-dependent activator protein for secretion 2	1129.21	813.412	390.297
Cage1	cancer antigen 1	25.6978	27.6944	7.77215
Calb1	calbindin 1	1.37586	4.60943	1.21586
Calca	calcitonin/calcitonin-related polypeptide, alpha	0.434561	1.00574	0.274288
Calcb	calcitonin-related polypeptide, beta	0	0	32.5461
Calcoco1	calcium binding and coiled coil domain 1	912.569	897.697	1212.02
Calcr	calcitonin receptor	0.465567	0.355885	7.08069
Calcrl	calcitonin receptor-like	16440.3	17293.5	29389
Cald1	caldesmon 1	9187.31	4485.89	17180.8
Calhm2	calcium homeostasis modulator 2	420.058	421.556	1289.9
Calm1	calmodulin 1	43025.1	61653.5	43975.9
Calm2	calmodulin 2	9725.34	7113.92	12549.6
Calm3	calmodulin 3	5445.42	3053.76	3135.45
Calml3	calmodulin-like 3	55.1258	84.6786	0
Calml4	calmodulin-like 4	205.082	171.821	15.5451
Calr	calreticulin	53961.4	38256.9	36336.8
Calr3	calreticulin 3	22.2059	19.9374	24.6429
Calr4	calreticulin 4	3.27114	1.06766	1.57579
Calu	calumenin	8546.77	6002.96	10656.9
Camk1	calcium/calmodulin-dependent protein kinase I	297.105	531.7	451.646
Camk1d	calcium/calmodulin-dependent protein kinase ID	15.8381	49.8129	15.4905
Camk1g	calcium/calmodulin-dependent protein kinase I gamma	1.67555	4.74417	0
Camk2a	calcium/calmodulin-dependent protein kinase II alpha	1103.74	218.651	41.4591
Camk2b	calcium/calmodulin-dependent protein kinase II, beta	196.429	380.405	287.702
Camk2d	calcium/calmodulin-dependent protein kinase II, delta	6653.73	4829.69	5443.14
Camk2g	calcium/calmodulin-dependent protein kinase II gamma	505.979	960.163	707.12
Camk2n1	calcium/calmodulin-dependent protein kinase II inhibitor 1	3366.99	1117.66	10814
Camk2n2	calcium/calmodulin-dependent protein kinase II inhibitor 2	175.424	91.2205	195.347
Camk4	calcium/calmodulin-dependent protein kinase IV	2347.12	6693.51	100.511
Camkk1	calcium/calmodulin-dependent protein kinase kinase 1, alpha	9.32901	101.537	5.14498
Camkk2	calcium/calmodulin-dependent protein kinase kinase 2, beta	370.886	746.35	928.403
Camkv	CaM kinase-like vesicle-associated	0.310378	0	2.08071
Caml	calcium modulating ligand	878.492	954.342	1187.56
Camp	cathelicidin antimicrobial peptide	4.83573	8.40178	0.333644
Camsap1	calmodulin regulated spectrin-associated protein 1	2478.33	1209.79	911.061
Camsap2	calmodulin regulated spectrin-associated protein family, member 2	5431.4	5809.96	6505.66
Camsap3	calmodulin regulated spectrin-associated protein family, member 3	123.525	109.17	19.6675
Camta1	calmodulin binding transcription activator 1	928.545	604.194	809.296
Camta2	calmodulin binding transcription activator 2	595.571	792.665	574.134
Cand1	cullin associated and neddylation disassociated 1	3686.63	3510.85	4315.46
Cand2	cullin-associated and neddylation-dissociated 2 (putative)	397.654	155.382	252.105
Cant1	calcium activated nucleotidase 1	2535.8	2290.72	2259.39
Canx	calnexin	64316.8	56515.2	61949.3
Cap1	CAP, adenylate cyclase-associated protein 1 (yeast)	1666.4	1959.6	2180.87
Cap2	CAP, adenylate cyclase-associated protein, 2 (yeast)	286.402	82.5315	10.1394
Capg	capping protein (actin filament), gelsolin-like	238.996	2220.83	1419.01
Capn1	calpain 1	777.635	743.793	728.629
Capn10	calpain 10	241.215	181.985	234.09
Capn11	calpain 11	8.47888	15.3167	8.22829
Capn12	calpain 12	30.7437	95.8038	52.1258
Capn13	calpain 13	1.69258	0	0
Capn2	calpain 2	3977.37	3384.36	8840.34
Capn3	calpain 3	14.787	31.5737	7.50165
Capn5	calpain 5	511.021	227.75	233.889
Capn6	calpain 6	5.88217	3.90856	10.9538
Capn7	calpain 7	3247.65	3115.29	2580.16
Capn8	calpain 8	0.941296	0	9.05416
Capn9	calpain 9	0.155189	1.7638	0
Capns1	calpain, small subunit 1	8453.98	9473.16	15239.1
Capns2	calpain, small subunit 2	1.05532	3.6146	1.3015
Caprin1	cell cycle associated protein 1	3131.29	2922.25	2795.78
Caprin2	caprin family member 2	65.9449	49.8701	57.9729
Capsl	calcyphosine-like	0.155189	3.4884	0.752925
Capza1	capping protein (actin filament) muscle Z-line, alpha 1	753.466	837.132	814.904
Capza2	capping protein (actin filament) muscle Z-line, alpha 2	5808.12	5109.95	4401.47
Capzb	capping protein (actin filament) muscle Z-line, beta	2811.69	2597.62	4539.28
Car10	carbonic anhydrase 10	0.279371	0	101.164
Car11	carbonic anhydrase 11	47.2048	19.1032	80.6385
Car12	carbonic anyhydrase 12	33.9929	100.395	11.9615
Car13	carbonic anhydrase 13	152.752	136.034	10.8037
Car14	carbonic anhydrase 14	2.33366	10.8173	4.02322
Car15	carbonic anhydrase 15	65.5692	120.686	129.333
Car2	carbonic anhydrase 2	107.154	1321.07	224.529
Car3	carbonic anhydrase 3	40.2723	452.181	47.3362
Car4	carbonic anhydrase 4	55.385	3539.86	4.03213
Car5b	carbonic anhydrase 5b, mitochondrial	1162.48	1946.96	1318.95
Car6	carbonic anhydrase 6	12495.4	30280.8	41.5211
Car7	carbonic anhydrase 7	30.2113	448.604	137.749
Car8	carbonic anhydrase 8	973.552	277.473	53.5569
Car9	carbonic anhydrase 9	68.7203	21.7763	13.16
Card10	caspase recruitment domain family, member 10	1488.65	3879.32	2729.2
Card11	caspase recruitment domain family, member 11	4.46462	23.9305	6.95819
Card14	caspase recruitment domain family, member 14	1.55137	4.79046	3.92188
Card6	caspase recruitment domain family, member 6	662.537	651.61	848.04
Card9	caspase recruitment domain family, member 9	5.16088	6.32458	3.32965
Carf	calcium response factor	109.264	92.3755	135.948
Carhsp1	calcium regulated heat stable protein 1	2256.1	2852.67	5536.64
Carkd	carbohydrate kinase domain containing	1095.24	989.302	1197.72
Carm1	coactivator-associated arginine methyltransferase 1	61.4514	61.2347	57.3174
Carns1	carnosine synthase 1	286.879	140.318	52.5719
Cars	cysteinyl-tRNA synthetase	393.698	391.149	315.104
Cars2	cysteinyl-tRNA synthetase 2 (mitochondrial)(putative)	573.21	483.873	441.843
Cartpt	CART prepropeptide	0	0	2.603
Casc1	cancer susceptibility candidate 1	15.3036	20.2602	37.142
Casc3	cancer susceptibility candidate 3	2542.11	2905.28	2491.54
Casc4	cancer susceptibility candidate 4	1601.38	204.496	530.517
Casc5	cancer susceptibility candidate 5	86.9452	85.2262	61.066
Casd1	CAS1 domain containing 1	2509.68	3548.05	2003.55
Cask	calcium/calmodulin-dependent serine protein kinase (MAGUK family)	1315.86	1626.21	1750.87
Caskin1	CASK interacting protein 1	159.623	174.039	120.243
Caskin2	CASK-interacting protein 2	1503.95	3326.58	3052.28
Casp1	caspase 1	2866.64	693.597	39.8679
Casp12	caspase 12	4570.24	1827.98	1494.16
Casp2	caspase 2	2398.98	2409.5	2217.72
Casp3	caspase 3	60.264	100.547	61.5475
Casp4	caspase 4, apoptosis-related cysteine peptidase	4636.83	1850.23	1768.57
Casp6	caspase 6	469.943	498.334	571.237
Casp7	caspase 7	7124.65	9730.98	6586.2
Casp8	caspase 8	2219.29	2818.3	1403.24
Casp8ap2	caspase 8 associated protein 2	1151.47	1266.97	1158.29
Casp9	caspase 9	3374.13	3696.86	3208.14
Casq1	calsequestrin 1	28.0726	31.1544	29.4746
Casq2	calsequestrin 2	7.24292	39.4173	7.32526
Casr	calcium-sensing receptor	1.83126	0.888988	7.71111
Cass4	Cas scaffolding protein family member 4	47.8905	2.7719	41.4061
Cast	calpastatin	2285.69	1960.78	2704.32
Casz1	castor zinc finger 1	540.017	1382.9	945.039
Cat	catalase	1840.13	2039.99	2528.04
Catsper2	cation channel, sperm associated 2	100.482	105.752	99.623
Catsper3	cation channel, sperm associated 3	8.05646	6.50888	10.3158
Catsper4	cation channel, sperm associated 4	0.313552	1.48165	0
Catsperb	catsper channel auxiliary subunit beta	17.1818	28.0408	162.472
Catsperg1	catsper channel auxiliary subunit gamma 1	30.59	48.6734	23.8633
Cav1	caveolin 1, caveolae protein	15501.3	53677.7	44063.5
Cav2	caveolin 2	3307.3	8031.23	10909.6
Cav3	caveolin 3	0	1.36398	0.752925
Cbfa2t2	core-binding factor, runt domain, alpha subunit 2, translocated to, 2 (human)	672.447	627.643	642.777
Cbfa2t3	core-binding factor, runt domain, alpha subunit 2, translocated to, 3 (human)	4304.85	4240.29	5033.07
Cbfb	core binding factor beta	5358.86	5650.29	4090.38
Cbl	Casitas B-lineage lymphoma	2647.16	3393.15	2430.45
Cblb	Casitas B-lineage lymphoma b	6794.71	4574.38	5944.83
Cblc	Casitas B-lineage lymphoma c	5.84799	13.4238	0.419282
Cbll1	Casitas B-lineage lymphoma-like 1	525.062	563.379	519.064
Cbln1	cerebellin 1 precursor protein	0	22.3416	0.419282
Cbln2	cerebellin 2 precursor protein	1.81295	2.48975	0
Cbln3	cerebellin 3 precursor protein	13.2589	22.9796	13.3449
Cbr1	carbonyl reductase 1	676.928	530.936	519.803
Cbr2	carbonyl reductase 2	23.659	52.1551	6.53379
Cbr3	carbonyl reductase 3	118.578	343.328	16.1683
Cbr4	carbonyl reductase 4	351.9	345.356	402.383
Cbs	cystathionine beta-synthase	9.04893	11.1917	5.4765
Cbwd1	COBW domain containing 1	314.841	314.648	377.97
Cbx1	chromobox 1	450.649	707.154	401.028
Cbx2	chromobox 2	158.135	126.452	128.936
Cbx3	chromobox 3	1714.35	1827	1568.22
Cbx4	chromobox 4	1150.86	1006.84	926.403
Cbx5	chromobox 5	4617.3	4317.16	8126.39
Cbx6	chromobox 6	2974.68	1447	2397.25
Cbx7	chromobox 7	1714.02	1832.4	1531.18
Cbx8	chromobox 8	90.8247	80.215	95.3795
Cby1	chibby homolog 1 (Drosophila)	203.452	198.258	269.631
Cc2d1a	coiled-coil and C2 domain containing 1A	396.634	309.875	407.079
Cc2d1b	coiled-coil and C2 domain containing 1B	475.285	560.972	614.613
Cc2d2a	coiled-coil and C2 domain containing 2A	1327.62	1032.61	1481.99
Ccar1	cell division cycle and apoptosis regulator 1	3400.49	3524	3423.1
Ccbe1	collagen and calcium binding EGF domains 1	36.4582	42.2261	36.2641
Ccbl1	cysteine conjugate-beta lyase 1	130.058	244.15	187.885
Ccbl2	cysteine conjugate-beta lyase 2	76.5164	109.676	84.3243
Ccbp2	NA	4054.79	1228.31	9737.91
Ccdc101	coiled-coil domain containing 101	419.158	883.15	584.705
Ccdc102a	coiled-coil domain containing 102A	436.578	583.584	260.344
Ccdc103	coiled-coil domain containing 103	1.5102	0	9.75663
Ccdc104	coiled-coil domain containing 104	885.294	602.117	670.687
Ccdc106	coiled-coil domain containing 106	18.6249	17.0431	20.5324
Ccdc107	coiled-coil domain containing 107	1078.99	587.923	793.512
Ccdc109a	NA	677.198	528.936	1130.87
Ccdc109b	coiled-coil domain containing 109B	44.2889	310.977	365.124
Ccdc11	coiled-coil domain containing 11	4.85416	6.26357	7.89086
Ccdc110	coiled-coil domain containing 110	0.951457	0.590296	6.55796
Ccdc111	coiled-coil domain containing 111	492.777	396.369	429.954
Ccdc112	coiled-coil domain containing 112	179.607	232.794	352.485
Ccdc113	coiled-coil domain containing 113	10.4041	1.18295	0
Ccdc114	coiled-coil domain containing 114	32.016	39.6801	61.4081
Ccdc115	coiled-coil domain containing 115	662.817	749.824	828.002
Ccdc116	coiled-coil domain containing 116	11.8507	10.5413	14.2466
Ccdc117	coiled-coil domain containing 117	1609.55	2953.01	2151.78
Ccdc12	coiled-coil domain containing 12	1610.76	1402.06	2578.52
Ccdc120	coiled-coil domain containing 120	210.432	187.19	217.649
Ccdc122	coiled-coil domain containing 122	333.46	135.817	43.1518
Ccdc123	NA	186.559	174.719	273.086
Ccdc124	coiled-coil domain containing 124	539.976	508.278	716.307
Ccdc125	coiled-coil domain containing 125	198.223	211.379	129.16
Ccdc126	coiled-coil domain containing 126	122.3	101.956	194.087
Ccdc127	coiled-coil domain containing 127	1732.34	1631.77	2088.73
Ccdc129	coiled-coil domain containing 129	6.90845	12.4894	0
Ccdc130	coiled-coil domain containing 130	327.442	330.344	365.107
Ccdc132	coiled-coil domain containing 132	719.604	694.735	496.254
Ccdc134	coiled-coil domain containing 134	214.639	207.214	275.458
Ccdc135	coiled-coil domain containing 135	0.155189	1.5412	7.80901
Ccdc136	coiled-coil domain containing 136	112.076	13.5986	423.42
Ccdc137	coiled-coil domain containing 137	644.999	639.208	627.696
Ccdc138	coiled-coil domain containing 138	113.298	155.83	162.335
Ccdc14	coiled-coil domain containing 14	134.209	219.506	57.3192
Ccdc141	coiled-coil domain containing 141	650.375	78.1071	1153.68
Ccdc142	coiled-coil domain containing 142	16.1034	25.6126	15.2475
Ccdc146	coiled-coil domain containing 146	163.178	52.3361	339.34
Ccdc148	coiled-coil domain containing 148	8.23365	81.0346	8.75059
Ccdc149	coiled-coil domain containing 149	1174.34	780.932	1207.66
Ccdc15	coiled-coil domain containing 15	185.555	182.907	156.615
Ccdc150	coiled-coil domain containing 150	10.0093	16.5147	11.2625
Ccdc151	coiled-coil domain containing 151	5.0342	0.293967	2.24308
Ccdc152	coiled-coil domain containing 152	1018.5	462.016	1051.55
Ccdc154	coiled-coil domain containing 154	2.78287	2.12441	15.2234
Ccdc155	coiled-coil domain containing 155	3.52332	0	4.0181
Ccdc157	coiled-coil domain containing 157	1866.9	1575.75	2728.1
Ccdc158	coiled-coil domain containing 158	4.86066	0	0
Ccdc159	coiled-coil domain containing 159	49.9102	48.957	39.9926
Ccdc160	coiled-coil domain containing 160	0.279371	4.01677	15.3908
Ccdc162	coiled-coil domain containing 162	8.36784	8.68721	10.0521
Ccdc163	coiled-coil domain containing 163	1090.67	1231.31	1070.49
Ccdc164	NA	3.97571	0.590296	2.08071
Ccdc17	coiled-coil domain containing 17	132.031	134.409	132.372
Ccdc18	coiled-coil domain containing 18	70.2822	40.9229	41.5328
Ccdc19	coiled-coil domain containing 19	9.05659	85.3088	14.1067
Ccdc21	NA	1480.09	1832.02	1121.28
Ccdc22	coiled-coil domain containing 22	58.3772	35.9894	25.0427
Ccdc23	coiled-coil domain containing 23	638.108	642.795	672.933
Ccdc24	coiled-coil domain containing 24	29.0692	4.67135	42.3044
Ccdc25	coiled-coil domain containing 25	781.435	662.834	861.343
Ccdc27	coiled-coil domain containing 27	0.58975	1.0081	1.09715
Ccdc28a	coiled-coil domain containing 28A	115.381	105.513	145.954
Ccdc28b	coiled coil domain containing 28B	355.76	2765.34	384.505
Ccdc3	coiled-coil domain containing 3	738.773	277.015	316.514
Ccdc30	coiled-coil domain containing 30	11.9275	3.54795	12.0556
Ccdc32	coiled-coil domain containing 32	913.882	950.485	996.144
Ccdc33	coiled-coil domain containing 33	69.065	186.497	18.5602
Ccdc34	coiled-coil domain containing 34	732.255	527.089	1299.17
Ccdc36	coiled-coil domain containing 36	2.27598	7.96218	3.44836
Ccdc37	coiled-coil domain containing 37	67.2996	18.3192	4.79352
Ccdc38	coiled-coil domain containing 38	100.196	94.7214	75.3108
Ccdc39	coiled-coil domain containing 39	79.9959	41.8715	109.588
Ccdc40	coiled-coil domain containing 40	16.6922	9.3536	18.1333
Ccdc41	coiled-coil domain containing 41	546.339	843.449	828.456
Ccdc42	coiled-coil domain containing 42	0	1.06766	0.274288
Ccdc42b	coiled-coil domain containing 42B	12.497	28.7157	9.0105
Ccdc43	coiled-coil domain containing 43	2102.33	2073.38	1984.02
Ccdc45	NA	393.662	435.317	512.403
Ccdc46	NA	305.546	295.194	437.222
Ccdc47	coiled-coil domain containing 47	2575.08	2882.21	2900.11
Ccdc48	NA	549.244	21.2541	1792.64
Ccdc50	coiled-coil domain containing 50	3971.54	3560.24	4286.39
Ccdc51	coiled-coil domain containing 51	123.11	135.478	98.0617
Ccdc53	coiled-coil domain containing 53	1015.46	795.952	694.824
Ccdc54	coiled-coil domain containing 54	0	0	1.24215
Ccdc55	coiled-coil domain containing 55	1652.76	1851.93	1758.55
Ccdc56	NA	1602.37	1459.71	1522.88
Ccdc57	coiled-coil domain containing 57	52.0128	42.314	106.319
Ccdc58	coiled-coil domain containing 58	581.248	595.284	540.433
Ccdc59	coiled-coil domain containing 59	964.938	1202.09	1193.52
Ccdc6	coiled-coil domain containing 6	7304.2	5328.38	5153.41
Ccdc60	coiled-coil domain containing 60	1.66539	14.3113	0
Ccdc61	coiled-coil domain containing 61	434.148	454.47	668.561
Ccdc62	coiled-coil domain containing 62	233.719	216.402	218.554
Ccdc63	coiled-coil domain containing 63	14.8457	1.65795	4.60487
Ccdc64	coiled-coil domain containing 64	1.02748	1.00574	0.419282
Ccdc64b	coiled-coil domain containing 64B	6.29777	10.9959	8.94603
Ccdc65	coiled-coil domain containing 65	2.87462	7.97163	6.15437
Ccdc66	coiled-coil domain containing 66	1129.48	1165.11	1041.12
Ccdc67	coiled-coil domain containing 67	312.669	392.454	30.214
Ccdc68	coiled-coil domain containing 68	5.19638	29.6053	15.2738
Ccdc69	coiled-coil domain containing 69	63.3711	121.601	237.315
Ccdc71	coiled-coil domain containing 71	196.138	240.595	234.973
Ccdc72	NA	1137.44	1316.95	1079.13
Ccdc73	coiled-coil domain containing 73	112.206	136.21	182.457
Ccdc74a	coiled-coil domain containing 74A	8.02253	8.4499	14.0473
Ccdc75	NA	413.908	477.179	614.923
Ccdc76	NA	137.863	142.244	122.663
Ccdc77	coiled-coil domain containing 77	371.01	396.784	299.767
Ccdc78	coiled-coil domain containing 78	35.6741	26.1982	46.8104
Ccdc79	coiled-coil domain containing 79	7.56418	9.58801	6.06027
Ccdc80	coiled-coil domain containing 80	782.368	245.127	203.329
Ccdc81	coiled-coil domain containing 81	78.6253	8.64511	25.7486
Ccdc83	coiled-coil domain containing 83	1.50004	1.65795	1.86578
Ccdc84	coiled-coil domain containing 84	411.01	435.82	388.535
Ccdc85a	coiled-coil domain containing 85A	176.089	1323.17	9.21353
Ccdc85b	coiled-coil domain containing 85B	2384.89	4890.28	2740.03
Ccdc86	coiled-coil domain containing 86	914.174	548.794	641.264
Ccdc87	coiled-coil domain containing 87	1.43735	0	1.00093
Ccdc88a	coiled coil domain containing 88A	9708.04	7626.85	2723.12
Ccdc88b	coiled-coil domain containing 88B	131.99	14.1464	1.11285
Ccdc88c	coiled-coil domain containing 88C	466.621	812.971	481.769
Ccdc89	coiled-coil domain containing 89	7.92279	8.52181	11.3782
Ccdc9	coiled-coil domain containing 9	420.571	567.389	597.784
Ccdc90a	NA	2328.55	2187.4	2320.46
Ccdc90b	coiled-coil domain containing 90B	1273.18	916.427	1131.04
Ccdc91	coiled-coil domain containing 91	1160	1177.58	1046.86
Ccdc92	coiled-coil domain containing 92	198.638	60.8009	349.383
Ccdc93	coiled-coil domain containing 93	576.911	541.279	501.021
Ccdc94	coiled-coil domain containing 94	102.304	107.795	114.688
Ccdc96	coiled-coil domain containing 96	38.9465	6.79104	3.80828
Ccdc97	coiled-coil domain containing 97	777.439	884.887	1140.08
Ccdc99	NA	89.4929	86.094	28.6992
Cchcr1	coiled-coil alpha-helical rod protein 1	347.759	376.557	171.432
Ccin	calicin	2.0473	0	1.00093
Cck	cholecystokinin	1.92761	7.23155	0
Cckar	cholecystokinin A receptor	8.12522	6.98769	0
Ccl11	chemokine (C-C motif) ligand 11	126.799	256.59	39.2605
Ccl12	chemokine (C-C motif) ligand 12	8.1565	1.71751	0
Ccl17	chemokine (C-C motif) ligand 17	0.630918	3.37165	1.24215
Ccl19	chemokine (C-C motif) ligand 19	19.4258	9.65084	0
Ccl2	chemokine (C-C motif) ligand 2	824.892	164.974	704.555
Ccl20	chemokine (C-C motif) ligand 20	1231.46	25.6987	0.419282
Ccl22	chemokine (C-C motif) ligand 22	3.17611	2.5493	0
Ccl24	chemokine (C-C motif) ligand 24	44.1383	1.71751	5.03473
Ccl25	chemokine (C-C motif) ligand 25	50.9398	43.8773	33.5089
Ccl27a	chemokine (C-C motif) ligand 27A	122.785	132.934	186.261
Ccl3	chemokine (C-C motif) ligand 3	2.65854	71.8467	1.08657
Ccl4	chemokine (C-C motif) ligand 4	0	11.2049	4.4582
Ccl5	chemokine (C-C motif) ligand 5	63.1638	106.897	5.07504
Ccl6	chemokine (C-C motif) ligand 6	6.64228	46.7885	32.7781
Ccl7	chemokine (C-C motif) ligand 7	182.641	44.2447	143.024
Ccl8	chemokine (C-C motif) ligand 8	37.7942	15.2609	9.70195
Ccl9	chemokine (C-C motif) ligand 9	307.793	174.22	43.5598
Ccm2	cerebral cavernous malformation 2	280.713	387.715	326.554
Ccna1	cyclin A1	3.10326	3.66089	1.78014
Ccna2	cyclin A2	284.549	308.365	300.821
Ccnb1	cyclin B1	82.8919	81.391	87.2984
Ccnb2	cyclin B2	207.652	154.111	122.318
Ccnc	cyclin C	2439.47	2704.4	1644.21
Ccnd1	cyclin D1	21768.6	20318.7	8183.55
Ccnd2	cyclin D2	355.895	1280.42	6093.72
Ccnd3	cyclin D3	292.466	378.882	316.821
Ccndbp1	cyclin D-type binding-protein 1	2091.49	2085.43	2055.31
Ccne1	cyclin E1	16.166	15.4438	13.4449
Ccne2	cyclin E2	92.9695	109.318	110.638
Ccnf	cyclin F	58.8809	66.3017	51.8168
Ccng1	cyclin G1	5109.87	4680.03	3705.73
Ccng2	cyclin G2	436.447	786.675	374.212
Ccnh	cyclin H	802.614	752.573	810.188
Ccni	cyclin I	5236.45	5462.6	5702.36
Ccnj	cyclin J	636.787	168.915	231.636
Ccnjl	cyclin J-like	196.287	61.5902	180.006
Ccnk	cyclin K	745.886	806.445	888.275
Ccnl1	cyclin L1	3620.81	4520.02	6581.25
Ccnl2	cyclin L2	6032.4	8568.16	9522.36
Ccno	cyclin O	8.12397	13.9394	99.3746
Ccnt1	cyclin T1	371.067	437.761	409.839
Ccnt2	cyclin T2	4638.53	5148.04	4907.74
Ccny	cyclin Y	3765.13	4887.18	4467.65
Ccnyl1	cyclin Y-like 1	1224.71	2433.18	2245.32
Ccpg1	cell cycle progression 1	2446.56	2153.04	1832.01
Ccr1	chemokine (C-C motif) receptor 1	0.155189	2.66133	0.548577
Ccr10	chemokine (C-C motif) receptor 10	26.6955	121.539	24.4225
Ccr2	chemokine (C-C motif) receptor 2	5.53379	20.9663	4.71679
Ccr3	chemokine (C-C motif) receptor 3	12.9739	2.84563	1.57579
Ccr4	chemokine (C-C motif) receptor 4	1.87508	2.66133	2.39866
Ccr5	chemokine (C-C motif) receptor 5	5.26787	10.4543	7.19217
Ccr6	chemokine (C-C motif) receptor 6	3.17495	10.9231	0.822865
Ccr7	chemokine (C-C motif) receptor 7	6.49742	34.0398	0.419282
Ccr9	chemokine (C-C motif) receptor 9	139.626	180.952	79.6752
Ccrl1	Ackr4 (Ccrl1)	8121.82	321.699	93.5729
Ccrl2	chemokine (C-C motif) receptor-like 2	353.523	504.872	95.3272
Ccrn4l	CCR4 carbon catabolite repression 4-like (S. cerevisiae)	2298.87	2339.72	363.766
Ccs	copper chaperone for superoxide dismutase	680.219	736.036	709.439
Cct2	chaperonin containing Tcp1, subunit 2 (beta)	4343.11	4976.61	4949.22
Cct3	chaperonin containing Tcp1, subunit 3 (gamma)	1997.13	1879.3	1921.77
Cct4	chaperonin containing Tcp1, subunit 4 (delta)	2339.6	2682.6	2783.84
Cct5	chaperonin containing Tcp1, subunit 5 (epsilon)	2717.46	2468.88	2988.33
Cct6a	chaperonin containing Tcp1, subunit 6a (zeta)	2339.99	2146.31	2637.99
Cct6b	chaperonin containing Tcp1, subunit 6b (zeta)	17.6225	15.9197	11.3553
Cct7	chaperonin containing Tcp1, subunit 7 (eta)	1392.7	1626.97	1688.49
Cct8	chaperonin containing Tcp1, subunit 8 (theta)	3073.81	2795.15	3509.71
Cct8l1	chaperonin containing TCP1, subunit 8 (theta)-like 1	2.31651	3.13724	2.51737
Ccz1	CCZ1 vacuolar protein trafficking and biogenesis associated	883.51	948.034	932.046
Cd101	CD101 antigen	6.08888	6.63272	7.98708
Cd109	CD109 antigen	12.0812	771.928	2370.17
Cd14	CD14 antigen	77.4115	123.78	324.958
Cd151	CD151 antigen	5338.68	10094.4	11262.8
Cd160	CD160 antigen	97.2227	111.971	60.5589
Cd163	CD163 antigen	0.310378	1.83044	3.94816
Cd163l1	CD163 molecule-like 1	5.37257	0.71177	0
Cd164	CD164 antigen	11476.2	8558.77	12720.8
Cd164l2	CD164 sialomucin-like 2	3.89254	16.2926	2.0875
Cd180	CD180 antigen	2.0163	11.0422	0
Cd19	CD19 antigen	17.4345	182.625	3.9202
Cd1d1	CD1d1 antigen	639.24	385.871	197.424
Cd1d2	CD1d2 antigen	19.8343	25.311	2.90358
Cd2	CD2 antigen	12.707	123.837	1802.29
Cd200	CD200 antigen	3399.36	56675.1	25954.1
Cd200r1	CD200 receptor 1	0.313552	2.36736	4.27801
Cd200r3	CD200 receptor 3	0	5.78675	0
Cd200r4	CD200 receptor 4	0.775946	2.13531	0
Cd209b	CD209b antigen	151.105	58.2707	0.752925
Cd209d	CD209d antigen	8.73292	1.06766	0
Cd209e	CD209e antigen	3.40613	0	0
Cd209f	CD209f antigen	1.77877	0	0
Cd22	CD22 antigen	28.2274	172.617	2.7637
Cd226	CD226 antigen	303.335	11.4199	3.61963
Cd244	CD244 natural killer cell receptor 2B4	9.7039	12.7744	24.8329
Cd247	CD247 antigen	897.461	847.666	3.41529
Cd248	CD248 antigen, endosialin	61.5447	141.325	75.9158
Cd24a	CD24a antigen	5539.61	10412	8350.74
Cd27	CD27 antigen	41.0892	19.7483	52.4531
Cd274	CD274 antigen	11611.8	9798.23	865.989
Cd276	CD276 antigen	96.5893	177.29	163.372
Cd28	CD28 antigen	7.45386	44.9506	31.2555
Cd2ap	CD2-associated protein	4348.39	7079.17	3816.18
Cd2bp2	CD2 antigen (cytoplasmic tail) binding protein 2	7632.77	4727.56	2788.24
Cd300a	CD300A antigen	15.2854	9.29641	61.3813
Cd300c	CD300C antigen	6.12106	1.89709	0
Cd300e	CD300e antigen	0.279371	1.17823	0
Cd300lb	CD300 antigen like family member B	0.155189	2.84708	1.53213
Cd300ld	CD300 molecule-like family member d	4.84351	4.59762	1.00093
Cd300lg	CD300 antigen like family member G	15294.3	67529.6	11322.7
Cd302	CD302 antigen	3145.87	901.146	1947.59
Cd320	CD320 antigen	175.829	314.218	190.842
Cd33	CD33 antigen	5.65364	0.355885	1.78014
Cd34	CD34 antigen	887.142	56500.2	2342.87
Cd36	CD36 antigen	29438.4	43615.1	1196.55
Cd37	CD37 antigen	299.709	231.502	238.73
Cd38	CD38 antigen	39668.3	50425.3	10905.9
Cd3d	CD3 antigen, delta polypeptide	5.30591	57.8842	1.11285
Cd3e	CD3 antigen, epsilon polypeptide	10.533	110.945	6.56351
Cd3eap	CD3E antigen, epsilon polypeptide associated protein	213.963	331.229	269.515
Cd3g	CD3 antigen, gamma polypeptide	5.40293	49.1063	1.25785
Cd4	CD4 antigen	12.6621	25.7165	7.78273
Cd40	CD40 antigen	162.646	75.7332	456.392
Cd40lg	CD40 ligand	0.155189	2.25061	0.274288
Cd44	CD44 antigen	2640.32	1887.96	127.826
Cd46	CD46 antigen, complement regulatory protein	169.481	140.999	77.0778
Cd47	CD47 antigen (Rh-related antigen, integrin-associated signal transducer)	8884.4	6650.67	10349.8
[truncated: 13,333 more rows]

## Sheet: Additional information
List of genes with average FPKM of 1 and greater in at least 1 cell type: LN-LEC, LN-BEC, or D-LEC
Average values derived from 3 comparisons: LN-LECvD-LEC, LN-LECvLN-BEC, & D-LECvLN-BEC.
IMPORTANTLY, predicted sequence genes, RIKEN genes, EST cDNA sequence genes were excluded from this list. WHY - we are focusing on genes with known annotated functions in order to better understand the distinct functional charatceristics of LN-LEC, LN-BEC, and D-LEC.
1. A total of 15,331 genes were identified based on average RPKM (normalized count) of 1 and greater in at least 1 cell type.
2. Total number of genes with average RPKM of 1 and greater in LN-LEC-14,718; LN-BEC-14,893; and D-LEC-14,384.
3. Differential expression analyses for 15,331 genes were further analyzed in 3 comparisons: LN-LECvD-LEC, LN-LECvLN-BEC, and D-LECvLN-BEC
