# Supplementary material for: Comparative Transcriptomic Analysis Identifies a Range of Immunologically Related Functional Elaborations of Lymph Node Associated Lymphatic and Blood Endothelial Cells
Source: Front Immunol. 2019 Apr 16;10:816. doi: 10.3389/fimmu.2019.00816 (PMC6478037; doi:10.3389/fimmu.2019.00816)
Supplement: Supplementary file 2 [file Table_2.XLSX]

## Sheet: 5X-DEG LN-LEC only
5X-DEGs in LN-LEC only subset with average FPKM, p-adjusted, and log2 fold-change values in LN-LEC v D-LEC, LN-LEC v LN-BEC, and D-LEC v LN-BEC.
				LN-LEC v D-LEC		LN-LEC v LN-BEC
5X-DEG	Average FPKM LN-LEC	Average FPKM LN-BEC	Average FPKM D-LEC	P-adjusted	Log2 FC	P-adjusted	Log2 FC
A2m	448.058	19.1188	2.76537	5.51e-54	6.93	1.14e-78	4.55
Ache	491.629	34.6169	14.2203	5.44e-73	5.04	2.57e-58	3.82
Ackr4	8121.82	321.699	93.5729	1.77e-75	6.3	3.4e-18	4.41
Adam33	4173.3	99.6431	192.28	5.17e-115	4.43	1.02e-10	4.7
Adam9	9434.78	4101.79	1776.58	2.79e-13	2.38	0.000953	1.21
Adc	100.263	7.99434	36.744	1.81e-06	1.43	5.97e-18	3.56
Adm2	110.522	3.71572	1.25785	1.92e-20	6.06	1.11e-24	4.67
Adra2a	128.376	55.2368	14.584	1.68e-17	3.06	2.99e-06	1.24
Aif1	132.839	19.3995	15.0241	1.02e-20	3.13	2.52e-21	2.76
Ajap1	28.5206	4.32637	10.2912	0.021	1.38	8.12e-05	2.55
Alcam	19520.3	777.464	632.488	1.27e-291	4.95	1.24e-33	4.54
Aldh1a3	240.093	80.5948	24.0553	5.59e-35	3.27	2.15e-07	1.59
Alx4	24.9739	8.47353	4.35686	0.000606	2.32	0.132	1.35
Angpt1	515.499	47.8566	16.7483	8.13e-88	4.87	4.31e-24	3.4
Angptl4	2173.19	784.325	198.345	1.05e-86	3.46	0.000122	1.47
Apol11a	36.1854	0.948544	0	1.41e-09	5.82	5.92e-10	4.5
Apol11b	1568.99	47.3276	5.13607	3e-99	8.05	3.2e-24	4.83
Apol7b	61.5832	1.00574	0	6.67e-12	6.39	1.7e-12	5.1
Arhgap44	5435.57	379.542	1099.51	2.62e-82	2.32	3.06e-66	3.84
Astn1	5812.85	1027.89	26.8652	7.7e-276	7.65	6.54e-88	2.53
Atcay	338.743	59.7469	2.36179	3.48e-44	6.81	1.52e-39	2.52
Atp1a4	14.6322	0.355885	0.752925	7.45e-05	3.58	1.8e-05	3.96
Avpr1a	142.679	37.1166	7.92093	4.18e-23	4.04	5.67e-10	1.94
Batf2	241.093	180.619	36.7367	5.96e-31	2.69	0.0155	0.46
Bcan	109.976	7.11153	0	3.62e-16	7.19	5.63e-13	3.78
Bdkrb1	46.6946	18.839	3.31395	1.9e-10	3.5	0.0159	1.29
Birc2	11327.2	4694.26	1182.92	2.51e-152	3.27	8.18e-31	1.31
Birc3	1977	1417.94	279.932	9.78e-76	2.82	3.3e-05	0.518
Bmp2	9071.64	408.873	12.2393	1.12e-249	9.49	1.24e-167	4.49
Bmp3	207.87	27.4388	23.9989	1.61e-05	2.86	0.00038	2.61
Bmp8a	819.173	14.6966	0.419282	1.6e-41	9.37	1.65e-21	5.39
Bpifb3	9.69389	4.37883	0	0.00023	4.09	0.346	0.985
C2	6562.05	394.559	386.775	1.54e-128	4.08	7.68e-35	4
C3	32434.3	4059.57	4755.21	1.92e-39	2.76	4.47e-09	2.88
C5ar1	116.502	14.7986	13.6993	6.76e-11	3.01	5.5e-14	2.93
C8g	83.4556	66.4184	12.6483	7.01e-13	2.65	0.259	0.365
Cacna1a	220.661	35.5286	48.1654	1.12e-22	2.18	7.14e-31	2.64
Cacna1b	20.8927	1.47456	0	5.62e-07	5.09	1.97e-05	3.24
Cacna1f	108.471	2.07339	0	1.35e-16	7.22	9.81e-23	5.4
Cacng4	50.5532	10.9387	9.20973	2.86e-07	2.37	8.96e-08	2.18
Cadps	166.206	5.10005	0	6.27e-20	7.75	6.04e-29	4.91
Camk2a	1103.74	218.651	41.4591	6.81e-135	4.74	3.67e-62	2.36
Car9	68.7203	21.7763	13.16	2.79e-07	2.32	0.000265	1.65
Ccdc88b	131.99	14.1464	1.11285	9.97e-22	6.28	1.01e-19	3.18
Ccl12	8.1565	1.71751	0	0.000691	3.86	0.076	1.81
Ccl20	1231.46	25.6987	0.419282	2.92e-45	9.82	1.57e-23	5.26
Ccl24	44.1383	1.71751	5.03473	7.49e-08	2.92	3.65e-10	4.23
Ccl9	307.793	174.22	43.5598	5.26e-17	2.8	0.377	0.769
Ccr3	12.9739	2.84563	1.57579	0.00423	2.52	0.0489	1.82
Cd163l1	5.37257	0.71177	0	0.0104	3.14	0.123	1.87
Cd209d	8.73292	1.06766	0	0.000361	4	0.0168	2.39
Cd209e	3.40613	0	0	0.0312	2.73	0.0356	2.54
Cd226	303.335	11.4199	3.61963	6.85e-41	6.2	1.99e-41	4.67
Cd33	5.65364	0.355885	1.78014	0.168	1.41	0.0154	2.65
Cd55	54930.9	4196.23	4219.56	1.77e-272	3.71	5.84e-204	3.74
Cd59a	2473.58	824.306	348.467	1.76e-82	2.83	9.25e-23	1.62
Cd5l	8.30137	1.17823	0.838563	0.00836	2.71	0.0229	2.21
Cd6	95.0161	18.2416	7.61869	3.83e-17	3.6	3.91e-11	2.34
Cdh22	139.097	14.6096	2.28506	1.06e-25	5.71	4.29e-21	3.23
Cdh4	713.195	422.989	82.5297	2.19e-91	3.1	4.12e-13	0.792
Cdh6	65.6403	4.09195	0.607932	4.14e-14	5.66	1.61e-11	3.8
Cdhr5	128.316	11.5385	0.752925	2.59e-20	6.54	1.05e-20	3.4
Cebpa	1462.98	417.155	132.766	5.53e-87	3.46	9.55e-23	1.84
Cfc1	6.30544	0	0	0.00344	3.46	0.00371	3.26
Cfi	6.69192	3.13251	0.752925	0.0194	2.47	0.325	0.96
Cfp	1561.96	297.872	271.11	1.46e-55	2.54	4.12e-81	2.43
Chrna3	73.6059	5.14399	0	1.15e-13	6.71	8.34e-15	3.69
Cldn11	5675.93	445.09	557.285	7.48e-208	3.36	2.27e-112	3.69
Cldn2	13.637	4.73944	1.94251	0.00511	2.4	0.105	1.38
Clec13c	773.856	113.122	61.7	1.56e-54	3.61	1.51e-44	2.79
Clec1a	8889.12	4279.96	1067.02	1.72e-96	3.06	2.42e-24	1.09
Clec1b	1187.19	149.352	18.9575	2.56e-33	5.71	4.36e-30	2.99
Clec4a3	42.0202	4.91666	2.70602	4.21e-09	3.57	1.68e-07	2.94
Clec4d	10.7822	0.71177	2.17314	0.0402	1.96	0.00323	2.93
Clec4e	33.0584	1.71987	0.333644	1.63e-08	5.06	5.57e-07	3.75
Clec4g	3495.08	79.1957	6.53	1.42e-148	8.89	7.08e-15	4.95
Clec9a	2562.23	1128.36	261.9	2.7e-136	3.29	6.54e-35	1.22
Cnr1	98.531	14.8695	0.69357	3.13e-17	6.17	4.86e-07	2.6
Cnr2	1196.93	323.927	72.0762	2.86e-66	4.02	4.27e-16	1.9
Cntn1	806.683	25.9577	6.99506	2.63e-40	6.55	8.21e-13	4.51
Cntn4	4.84086	0.355885	0	0.00769	3.22	0.0337	2.42
Coch	3324.18	179.721	104.366	1.89e-24	4.79	2.44e-33	4.14
Col12a1	9123.92	288.609	38.6487	1.24e-302	7.87	2.13e-29	4.81
Col14a1	1511.98	272.515	275.052	9.46e-27	2.45	4.47e-10	2.43
Col16a1	706.612	141.079	218.966	8.64e-33	1.71	1.71e-33	2.35
Col22a1	487.692	8.00433	0.752925	8.91e-38	8.36	4.33e-09	4.85
Col24a1	76.0447	5.20118	4.14193	1.43e-16	4.05	1.76e-15	3.75
Col27a1	3032.65	261.885	38.9264	2.41e-207	6.29	8.99e-175	3.57
Colec11	299.788	41.8523	44.8293	1.13e-24	2.7	1.14e-24	2.84
Colq	3672.99	112.435	4.77614	1.41e-151	9.37	1.22e-29	4.86
Cpe	35126.9	1404.86	1793.66	1.24e-302	4.3	2.47e-121	4.64
Cryaa	6.08499	0.293967	0	0.00509	3.36	0.0227	2.59
Csf1	24107.7	1783.05	800.305	1.24e-302	4.92	4.83e-107	3.77
Csf2	21.181	3.61696	0.419282	1.28e-05	4.28	0.0184	2.15
Csf3r	7.38422	2.1816	0	0.000901	3.79	0.155	1.44
Cspg5	78.1859	11.7805	18.4356	5.27e-09	2.1	6.08e-12	2.71
Ctnna2	12.5803	2.1816	0.667287	0.000426	3.35	0.0134	2.16
Ctnnd2	216.078	4.23937	2.28506	3.42e-32	6.31	1.52e-11	4.9
Ctsk	299.456	59.8608	123.314	1.04e-10	1.29	1.53e-21	2.33
Ctsl	13725.9	7430.91	2686.65	1.24e-57	2.36	1.29e-10	0.923
Cux2	47.036	4.03004	9.48235	1.46e-06	2.28	1.62e-09	3.38
Cxcl10	5845.58	750.85	61.631	1.55e-233	6.51	2.56e-47	2.98
Cxcl16	4090.27	517.216	90.0666	4.5e-288	5.49	1.15e-71	3.01
Cyba	5158.24	1714.07	698.693	8.25e-144	2.89	1.18e-54	1.63
Cyp1b1	73497.2	1758.73	65.844	3.01e-56	9.36	8.94e-16	4.93
Cyp7b1	572.154	134.222	52.6053	1.36e-69	3.44	4.8e-49	2.12
Daf2	226.704	30.7248	17.4885	3.19e-32	3.63	2.46e-28	2.87
Dbil5	79.9977	21.5089	13.67	6.54e-11	2.53	6.42e-07	1.88
Dcc	3.86459	2.60413	0	0.0385	2.65	0.736	0.478
Dkk2	749.281	149.81	41.3454	2.62e-82	4.14	1.39e-39	2.35
Dlg2	218.042	39.6356	5.20601	2.83e-41	5.21	8.95e-26	2.46
Dnajc6	1776.25	71.4855	24.8473	3.65e-162	6.1	3.81e-109	4.64
Dnase1l3	423.388	68.9721	132.09	4.49e-15	1.69	3.75e-29	2.64
Dpysl4	39.5461	6.14827	15.1589	0.0176	1.32	6.65e-07	2.54
Dscaml1	58.7531	3.3159	1.94251	1.84e-11	4.44	8.39e-11	3.87
Dyx1c1	98.0288	36.0646	13.614	1.26e-12	2.75	2.5e-05	1.45
E2f8	194.135	32.9774	99.9492	3.04e-05	0.984	1.52e-20	2.57
Ebi3	17.0656	3.55504	0	2.86e-06	4.85	0.0047	2.06
Eda	181.287	30.9226	94.8169	1.75e-06	0.952	1.02e-09	2.52
Edaradd	1239.52	238.019	585.284	4.7e-17	1.09	1.6e-102	2.41
Edil3	174.945	20.2971	50.8179	3.11e-07	1.75	3.4e-22	3.09
Efna2	29.762	4.02386	14.9838	0.0589	0.953	7.13e-06	2.68
Emilin1	2008.48	264.064	1277.91	1.95e-07	0.668	5.27e-91	2.96
Eno2	107.498	40.8294	18.4495	8.56e-16	2.5	1.03e-06	1.42
Entpd2	1065.16	519.34	106.136	4e-93	3.32	1.12e-16	1.08
Epb4.1l4b	648.517	80.55	7.20787	3.42e-87	6.35	6.92e-09	2.89
Epdr1	132.495	26.2734	97.9098	0.195	0.451	3.31e-10	2.33
Ephb2	38.1085	10.495	7.25876	1.89e-05	2.33	0.0179	1.72
Epor	1061.61	157.551	243.113	2.1e-48	2.14	5.58e-34	2.77
Erc2	18.4994	6.3865	2.36179	0.00101	2.61	0.0467	1.42
Ern1	182.228	150.389	33.8369	2.86e-18	2.39	0.463	0.305
Errfi1	19090.3	3666.67	12506.4	3.12e-05	0.626	1.82e-10	2.35
Esrrb	84.0393	7.84779	2.31302	1.34e-15	4.69	2.68e-11	3.26
Eya1	531.924	103.146	190.395	6.27e-22	1.49	2.75e-36	2.38
F5	414.992	37.6459	23.9384	2.87e-55	4.12	1.07e-44	3.46
F8	57606.3	7111.19	845.872	1.24e-302	6.08	6.16e-115	3.05
Fam5c	4.49181	0.355885	0	0.0103	3.13	0.0439	2.33
Fam83h	11.6715	9.57384	1.38714	0.00396	2.62	0.731	0.327
Fancd2	93.5864	24.2348	11.5664	3.21e-13	2.89	1.95e-09	1.93
Fcgr2b	504.568	48.1207	10.8589	2.27e-76	5.55	2.52e-32	3.39
Fcho1	962.135	154.331	40.2712	4.25e-158	4.58	1.3e-58	2.67
Fermt3	226.838	48.6924	10.9305	2.09e-43	4.3	7.32e-19	2.23
Fgd4	262.04	45.0546	86.8395	2.81e-14	1.58	4.87e-35	2.55
Fgf14	219.114	11.6113	14.818	5.62e-23	3.73	2.23e-26	4.14
Fgf23	19.0676	1.59603	0.667287	2.36e-05	3.84	0.000138	3.04
Flrt2	10539.8	1031.89	3619.44	9.43e-13	1.55	5.65e-25	3.31
Flrt3	4389.34	398.016	1642.36	8.42e-36	1.43	1.99e-116	3.49
Fn1	8888.24	1632.9	5111.55	2.84e-13	0.814	7.78e-31	2.46
Frem1	40.5209	4.15151	5.95726	5.62e-06	2.67	1.3e-05	3
Fstl4	4.25878	0	0	0.0255	2.81	0.0347	2.56
Fyb	550.842	41.5114	4.58749	3.05e-63	6.76	5.42e-70	3.73
Fzd1	2688.84	259.157	371.913	5.73e-55	2.85	2.22e-43	3.37
Fzd7	2568.52	456.384	213.467	1.05e-74	3.58	5.06e-34	2.51
Galnt14	25.5823	0	0	5.56e-08	5.39	1.5e-08	5.25
Gata4	838.616	23.7228	24.598	7.03e-12	4.63	0.00182	3.34
Gata6	7449.66	422.493	350.342	3.69e-243	4.41	1.92e-27	4.05
Gbp8	277.785	167.672	49.8195	5.17e-13	2.43	0.00326	0.762
Gdf10	16643.9	713.036	274.928	8.26e-220	5.9	1.68e-19	4.34
Gdnf	38.5455	3.43593	0	1.05e-09	5.87	3.87e-07	3.21
Gfra1	5.51612	1.66031	0.274288	0.0152	2.76	0.2	1.4
Gfra2	959.937	144.163	32.7348	2.05e-82	4.85	2.81e-07	2.62
Gfra4	28.1865	1.71987	5.84534	0.000134	2.21	2.09e-07	3.64
Gjb6	19.073	0.355885	0.548577	2.59e-05	3.87	7.05e-06	4.15
Glipr2	11211.7	908.837	445.879	6.3e-158	4.65	3.17e-129	3.65
Glp1r	8.50487	1.53175	1.00093	0.0151	2.44	0.0394	1.98
Gp1ba	214.628	33.2661	15.2844	3.27e-32	3.73	2.84e-22	2.68
Gpam	197.635	35.727	20.0326	3.34e-30	3.28	7.06e-20	2.46
Gpr110	96.0084	10.7601	2.34441	8.57e-20	5.18	2.68e-17	3.09
Gpr119	10.9834	0	0.274288	0.000309	3.67	5.66e-05	4.13
Gprasp2	92.181	13.8416	28.2731	2.92e-07	1.68	4.87e-14	2.71
Gria3	5560.72	171.16	16.4164	2.81e-265	8.43	1.41e-30	4.85
Gria4	29.356	4.60707	1.36086	1.06e-07	3.92	2.71e-05	2.48
Grin2c	5.76766	0.592659	0	0.00321	3.47	0.0369	2.27
Has2	111.519	27.762	5.00677	1.82e-23	4.4	1.12e-05	1.95
Hc	1310.17	31.5862	3.9202	5.35e-87	8.17	1.92e-09	4.59
Hcn1	70.5223	3.14196	0	1.12e-13	6.7	2.37e-16	4.24
Hnf4a	4.53679	0	1.88315	0.425	0.968	0.0155	2.85
Hoxd9	12712.2	2478.98	8137.42	7.41e-05	0.658	2.73e-42	2.38
Hpgd	598.533	68.6913	59.8133	1.08e-51	3.34	2.01e-30	3.12
Hpse	4743.23	311.163	103.248	1.78e-245	5.51	5.13e-14	3.75
Htr2c	133.79	17.2421	0	5.86e-18	7.46	4.4e-15	2.9
Ifitm6	46.9322	8.526	10.6392	0.000159	2	2.05e-05	2.33
Igf1	14414.3	2345.64	1942.19	1.61e-87	2.9	1.3e-61	2.65
Igfals	7.34808	3.13724	0	0.002	3.61	0.347	1
Igsf21	96.3936	5.67854	2.08071	5.93e-18	5.17	7.91e-13	3.89
Il12rb1	34.706	13.8831	1.37144	6.35e-07	3.89	0.0447	1.26
Il13ra2	983.075	35.3505	3.00659	1.08e-79	7.91	3.83e-101	4.8
Il1rapl1	82.9732	2.25061	1.8238	1.98e-18	5.02	9.89e-20	4.88
Il1rl1	26.538	2.89337	4.93719	0.187	1.65	6.31e-05	2.88
Il1rn	11.6498	5.20118	1.63515	0.0042	2.45	0.224	1.08
Il21r	185.499	13.1094	1.02721	2.64e-26	6.77	2.51e-31	3.75
Il27ra	6246.09	2239.19	747.637	4.88e-249	3.08	1.38e-71	1.52
Il33	19528.8	737.508	2281.59	2.16e-19	3.05	2.83e-18	4.47
Insl6	66.016	36.133	10.95	2.94e-09	2.51	0.0269	0.878
Insm1	39.7624	1.71751	1.94251	2.65e-08	3.89	1.04e-08	4.05
Insrr	355.597	24.5267	0.941576	6.58e-36	7.66	2.58e-09	3.58
Iqsec2	2209.16	693.242	313.735	1.15e-64	2.82	5.47e-31	1.7
Irf8	4328.99	575.225	748.991	3.11e-70	2.54	2.43e-71	2.94
Irs2	107.874	24.6659	5.64778	2.84e-22	4.17	2.84e-13	2.13
Itga2b	9490.18	338.053	103.064	8.23e-87	6.41	1.27e-26	4.64
Jak1	42975.6	15602.3	7609.83	6.64e-242	2.51	3.64e-90	1.5
Jph3	56.021	8.99535	7.72849	5.25e-08	2.77	3.18e-07	2.55
Kcna2	708.237	27.3585	7.83362	8.82e-33	6.19	6.57e-62	4.66
Kcna6	86.2535	10.8352	0.838563	1.65e-16	6	3.61e-13	2.93
Kcnc1	64.4926	1.83281	1.76444	2.11e-13	4.63	4.68e-14	4.64
Kcnc3	6.63055	6.62472	0.419282	0.0225	2.68	0.975	0.0457
Kcnj1	18.6616	5.20209	1.63515	3.18e-05	3.11	0.00632	1.73
Kcnj2	11136.7	2206.12	479.19	3.69e-17	4.32	1.33e-28	2.35
Kcnu1	18.7623	1.95664	5.3824	0.0252	1.71	0.000245	2.86
Klrb1f	7205.73	281.677	898.704	4.31e-50	3	3.34e-36	4.57
Lamb3	352.551	18.6444	0.333644	1.56e-29	8.24	1.79e-38	4.21
Lamc2	1279.32	242.512	290.396	2.2e-26	2.14	2.16e-33	2.42
Lect1	22.1281	3.07059	8.39957	0.0406	1.31	0.000206	2.55
Lgmn	10577.4	2148.34	6733.3	6.99e-10	0.669	5.18e-146	2.34
Loxl4	343.637	86.0519	42.9018	4.89e-44	3.02	3.54e-28	2.02
Lpar1	2603.36	667.479	219.866	3.08e-24	3.5	0.000269	1.89
Lphn3	172.857	39.492	25.9232	5.25e-11	2.63	2.73e-12	2.13
Lrp2	394.065	35.9582	120.519	0.00149	1.65	4.61e-46	3.45
Lrrn1	888.851	87.4793	55.7696	2.75e-20	3.88	1.13e-40	3.34
Lrrn3	140.384	14.949	13.4991	4.47e-13	3.22	0.000916	2.75
Lrrtm4	11.0157	0	0	8.87e-05	4.28	6.31e-05	4.11
Lsamp	28.9405	0.888988	1.02721	2.33e-07	4.13	3.77e-07	4.08
Ltb	156.991	15.8209	0.333644	1.57e-20	7.16	1.76e-17	3.23
Ltbp1	6247.4	799.447	2715.58	6.83e-35	1.22	7.38e-56	2.98
Ltc4s	2032.52	141.014	198.48	9.68e-98	3.36	7.94e-75	3.86
Lypd1	30.6805	1.06766	1.21586	2.25e-08	4.04	1.21e-08	4.24
Map6d1	114.351	34.4543	15.7491	1.32e-13	2.86	2.99e-09	1.75
Marco	24815	756.111	6.71697	2.12e-90	11.1	3.67e-09	4.37
Meox2	3012.02	1059.73	385.467	1.88e-79	2.97	1.83e-15	1.54
Mfi2	37.0096	2.84708	16.6571	0.0366	1.11	3.65e-05	3.23
Mir511	4.05106	0	3.35593	0.859	0.217	0.0195	2.77
Mme	333.874	41.8097	3.81719	1.31e-42	6.33	1.84e-28	3
Mmp13	244.853	12.8505	2.57672	9.01e-33	6.17	1.39e-25	4.17
Mmp9	5319.09	92.3402	7.32491	1.91e-100	9.21	2.97e-13	5.14
Msr1	15988.7	372.872	10.2336	1.18e-67	9.89	7.28e-12	4.79
Mst1r	75.0585	12.367	48.0213	0.0612	0.661	2.74e-13	2.58
Muc4	44.2165	0.355885	0.548577	5.05e-10	5.05	1.2e-10	5.33
Mylk3	54.1646	5.98523	5.4803	1.07e-10	3.14	1.98e-08	3.01
Myo16	44.903	3.07768	0.838563	1.23e-10	5.06	2.28e-09	3.55
Myo1e	8176.97	3295.9	856.496	5.06e-183	3.27	2.13e-58	1.35
Myo3b	7.30124	0.296329	0	0.00114	3.74	0.0044	2.99
Myom2	37.633	0.296329	0.274288	2.07e-09	5.26	6.19e-10	5.17
Ndn	1057.32	151.784	679.085	6.89e-08	0.657	3.93e-35	2.81
Nfkb2	5044.5	3674.39	811.279	2.41e-172	2.65	6.18e-08	0.498
Ngfr	265.493	20.3118	14.4352	3.52e-52	4.14	1.11e-33	3.7
Nkx6-1	51.8054	2.72561	0	1.42e-11	6.28	1.56e-11	3.99
Nlgn2	1778.47	225.337	808.324	1.72e-19	1.15	5.35e-96	3.01
Nme4	138.501	21.3004	35.6345	3.95e-12	1.97	2.28e-19	2.7
Notch2	47201.8	6742.69	25419.6	4.88e-23	0.909	1.96e-97	2.84
Nrg2	33.0898	5.67709	2.45801	1.63e-07	3.37	1.13e-05	2.41
Nrtn	80.8329	12.6648	15.0046	2.26e-11	2.43	7.89e-12	2.66
Nrxn1	343.275	32.0932	7.06667	1.69e-41	5.36	1.91e-22	3.38
Ntn4	139.278	26.9699	26.9326	1.03e-12	2.32	5.96e-13	2.34
Obscn	99.566	13.1274	13.5094	6.11e-17	2.85	6.08e-18	2.89
Otud7a	85.103	5.45068	8.50258	7.38e-14	3.21	5.48e-11	3.68
P2rx2	396.333	134.668	54.9006	3.29e-24	2.84	1.86e-09	1.58
Pak1	253.99	19.5295	25.1979	1.55e-38	3.33	7.79e-45	3.7
Pak3	71.6948	11.0658	49.6389	0.172	0.537	5.34e-09	2.61
Parp14	5610.27	5599.95	1124.49	6.59e-87	2.33	0.831	0.0437
Pawr	948.583	424.979	108.75	4.61e-75	3.11	2.36e-28	1.2
Pcdh10	11.3135	1.5412	0.548577	0.000844	3.24	0.0096	2.35
Pcdh15	1559.27	113.364	23.9934	2.71e-46	5.84	1.21e-15	3.64
Pcdh8	6.27809	0	0.333644	0.0117	2.85	0.00274	3.34
Pcdhac1	3.04061	0	1.37144	0.585	0.746	0.0409	2.49
Pclo	71.9438	6.5127	10.412	6.97e-13	2.71	2.38e-15	3.39
Pcp4	19.9825	1.89236	0	1.04e-06	5.01	6.46e-05	2.97
Pdgfa	1125.58	120.903	345.183	5.03e-53	1.72	3.76e-120	3.25
Pdlim4	4118.01	588.027	2841.31	0.000113	0.553	1.34e-94	2.84
Pla2g5	79.304	7.04816	0	3.39e-14	6.81	6.21e-14	3.39
Plcd1	2694.11	567.045	418.464	1.33e-58	2.69	4.71e-97	2.28
Pldi	9.98221	0.587934	5.12037	0.319	0.862	0.00316	2.94
Pnkd	2667.05	1320.68	313.549	1.07e-162	3.1	4.68e-39	1.05
Podnl1	302.985	23.051	8.50937	1.54e-49	5.03	2.28e-45	3.69
Postn	8083.02	668.987	1313.73	9.53e-68	2.63	4.53e-56	3.59
Ppfia4	162.952	32.8928	13.3521	2.49e-26	3.61	1.14e-17	2.32
Ppy	21.5698	0.355885	5.42606	0.00222	1.92	2.36e-07	4.49
Prkar1b	304.224	47.166	159.721	3.14e-05	0.939	1.92e-18	2.69
Prrx2	432.902	10.9119	22.8314	1.61e-48	4.16	4.32e-06	4.14
Psg22	1152.57	20.2088	91.0824	1.19e-95	3.65	3.99e-12	5.06
Ptger4	16739.1	2554.33	161.993	1.24e-302	6.68	1.39e-15	2.69
Pthlh	424.411	65.8617	204.498	1.99e-08	1.06	1.93e-47	2.72
Ptk2b	364.415	132.558	56.6303	1.48e-26	2.69	1.79e-10	1.48
Ptpn22	107.204	40.8412	8.74891	4.21e-21	3.58	2.25e-07	1.41
Ptprd	435.121	62.0132	86.1141	1.06e-32	2.33	8.72e-18	2.79
Pycard	546.215	287.307	59.9098	2.86e-55	3.17	2e-10	0.963
Rab20	199.11	80.4457	14.9329	4.24e-31	3.63	9.16e-10	1.34
Rab3c	12.5855	1.42354	0	3.26e-05	4.46	0.00482	2.59
Rag1	5.89157	3.25162	0	0.0127	3.08	0.611	0.68
Ramp1	43.0598	12.9706	2.38807	2.73e-10	3.89	0.001	1.7
Reg3b	3.0096	1.06766	0	0.0431	2.59	0.476	0.98
Relb	2447.53	1412.61	375.268	7.47e-114	2.71	3.25e-11	0.831
Rgs4	2341.73	429.307	9.51957	1.17e-21	6.96	6.32e-26	2.46
Rims2	16.5846	2.48266	0.274288	1.26e-05	4.19	0.00103	2.42
Rnf180	12.5178	1.18059	7.30921	0.333	0.74	0.00145	2.76
Rps3	85345.7	28989.7	15439.9	2.65e-156	2.48	9.75e-62	1.6
Rtn4rl2	31.4914	2.83854	0	1.14e-08	5.59	8.06e-07	3.16
Sarm1	25.233	13.3831	3.61452	0.00036	2.49	0.247	0.861
Scg5	216.011	9.23358	9.07744	2.59e-33	4.44	4.63e-31	4.47
Scn11a	145.581	18.8584	41.891	4.33e-10	1.77	2.15e-20	2.94
Sct	10.2012	0.592659	0	0.000129	4.21	0.00142	3.05
Scube2	43.1587	6.78159	0.607932	7.55e-11	5.08	9.26e-06	2.51
Sdk1	1212.23	35.9655	14.8092	5.36e-146	6.37	5.79e-16	4.7
Sema4g	82.9013	41.5886	13.1982	3.39e-11	2.62	0.011	1.02
Serpina3g	16977.6	2382.53	35.2958	1.24e-302	8.9	3.54e-109	2.86
Serpina3n	7601.85	333.729	1109.52	1.4e-58	2.78	5.88e-14	4.21
Sfrp1	2809.92	487.043	139.191	1.18e-35	4.26	1.27e-33	2.55
Shisa6	79.1935	5.13309	0	4.99e-14	6.79	4.32e-14	3.73
Siglec1	6.9634	0	2.60979	0.349	1.11	0.00373	3.27
Siglech	23.7397	4.14061	0.752925	4.23e-07	4.24	0.000118	2.35
Sirpa	52527.8	8700.12	15763	9.26e-44	1.75	2.04e-96	2.63
Six2	3.44083	3.85282	0	0.0489	2.54	0.982	-0.0363
Skint10	82.6538	12.6359	0	1.84e-14	6.86	2.63e-11	2.64
Skint8	7.02889	1.82572	0.333644	0.015	2.81	0.242	1.39
Slc18a1	1886.09	44.8593	8.39066	4.27e-143	7.65	4.89e-12	4.78
Slc38a1	744.04	475.875	134.819	7.81e-26	2.46	0.00653	0.681
Slc46a1	82.8575	35.9074	16.0827	6.52e-09	2.37	0.0355	1.19
Slc6a1	12.2269	0	0	4.2e-05	4.42	2.63e-05	4.26
Slc6a15	7.31759	0.296329	0.548577	0.0172	2.6	0.00663	2.92
Slc8a2	236.805	15.1356	0.838563	2.73e-27	7.37	1.02e-32	3.93
Slit1	56.4365	3.54414	1.63515	1.16e-13	4.66	2.4e-12	3.71
Slit2	828.213	80.1413	19.893	4.51e-33	5.18	9.97e-29	3.34
Slitrk5	79.2703	0.649852	0	1.9e-14	6.84	1.64e-17	5.92
Smoc1	185.8	56.544	22.8606	3.29e-16	2.95	0.0988	1.49
Snap91	61.3156	3.73371	0.838563	1.59e-11	5.38	3.2e-08	3.68
Sntb1	68.064	37.6666	10.7681	1.96e-09	2.58	0.0597	0.849
Snx10	3608.83	1856.07	375.148	4.24e-164	3.27	3.16e-17	0.999
Soat2	24.3025	4.07397	8.97231	0.0182	1.35	0.00015	2.38
Socs1	541.425	199.563	49.0811	1.13e-63	3.45	7.62e-17	1.47
Sp5	28.8228	1.36398	1.92002	3.39e-06	3.35	6.06e-08	3.91
Spem1	20.5129	1.47456	5.82073	0.00934	1.67	1.4e-05	3.24
Spib	2465.64	143.274	3.47464	9.01e-103	9.16	5.19e-67	4.1
Spock1	139.798	11.8669	4.20508	3.32e-26	4.83	5.27e-22	3.47
Spock3	486.282	8.17537	10.8088	1.62e-55	5.35	2.17e-59	5.8
Src	247.281	34.1047	44.4288	3.04e-25	2.47	3.26e-19	2.85
Srgap3	4557.21	700.926	1398.17	9.3e-60	1.72	4.99e-126	2.74
Stab2	42968.5	1013.5	329.978	1.24e-302	7.02	2.67e-14	4.89
Stau2	1002.73	470.386	114.658	4.64e-97	3.13	8.94e-18	1.13
Stc2	934.782	51.4612	134.439	1.46e-71	2.81	9.06e-52	4.17
Steap1	8.58709	0.293967	3.00659	0.159	1.27	0.0014	3.24
Sult2b1	83.0177	11.2256	8.51661	2.1e-13	3.27	3.26e-15	2.85
Sv2b	21.6291	1.47928	0.274288	1.53e-06	4.51	4.95e-05	3.23
Syn1	58.1839	6.15064	3.28599	1.1e-12	3.99	5.36e-11	3.1
Sync	56.0076	1.36398	1.57579	9.85e-13	4.62	3.69e-13	4.82
Syp	297.063	32.7298	15.5358	9.79e-50	4.27	1.96e-36	3.2
Syt13	40.0542	27.0696	5.7597	5.37e-07	2.71	0.418	0.56
Syt4	255.607	44.479	2.37237	1.43e-35	6.25	5.69e-17	2.51
Syt8	32.0736	2.07339	0.419282	6.73e-09	5.07	2.41e-07	3.59
Tbc1d4	8802.99	1356.7	4337.16	1.83e-14	1.04	3.55e-195	2.73
Tectb	268.69	5.10005	0	2.65e-24	8.36	1.88e-14	5.12
Tekt3	4.48482	0.355885	0	0.0106	3.12	0.0454	2.31
Tgfa	5730.43	281.401	264.339	2.51e-38	4.35	4.56e-87	4.34
Tiam1	774.631	145.135	16.881	3.05e-92	5.49	2.76e-29	2.43
Timd4	69.7507	26.8855	5.53586	8.16e-09	3.44	0.0229	1.35
Tnc	20586.4	817.838	571.663	1.24e-302	5.18	3.81e-29	4.52
Tnf	96.2869	28.7183	8.56194	9.13e-19	3.39	6.7e-05	1.73
Tnfaip3	3767.65	1865.09	676.296	3.02e-100	2.49	1.82e-28	1.05
Tnfrsf17	18.8208	2.31253	0	1.13e-06	4.99	0.000308	2.7
Tnip1	2890.23	2250.14	535.974	1.74e-115	2.44	0.000359	0.401
Tnni3	1077.34	135.526	127.557	3.09e-89	3.07	1.3e-64	3.01
Traf1	1635.16	1285.47	296.245	1.52e-64	2.47	0.0144	0.386
Trf	5108.45	851.966	2557.46	1.05e-11	1.01	1.93e-58	2.61
Trpm2	11.8067	1.00574	0.333644	0.000869	3.54	0.00703	2.69
Unc13d	418.511	37.0396	12.2112	3.72e-64	4.94	3.31e-49	3.51
Unc5a	150.669	61.837	24.9838	1.01e-16	2.58	1.44e-05	1.31
Unc5c	1349.32	202.886	2.21001	1.76e-74	8.71	4.09e-58	2.76
Ush1g	71.6336	3.02194	3.32965	1.49e-16	4.2	9.62e-17	4.36
Ust	47.1046	27.2385	6.74873	1.72e-07	2.66	0.116	0.805
Vdr	484.08	42.599	0.548577	1.43e-37	8.35	7.85e-50	3.52
Vegfa	1938.98	555.392	259.289	2.12e-75	2.91	1.7e-60	1.84
Vil1	102.759	62.0599	19.9253	6.25e-11	2.32	0.00349	0.756
Vpreb2	19.6938	1.00574	5.0716	0.0135	1.75	5.85e-06	3.63
Vwc2	333.244	9.95571	8.98122	4.99e-54	5.12	8.23e-47	4.98
Wasf1	165.389	30.2575	94.8865	0.0155	0.815	2.3e-10	2.42
Wnt10a	9.80037	1.0081	2.74288	0.186	1.41	0.00786	2.57
Wnt11	336.075	15.639	9.16308	3.38e-50	5.08	4.81e-40	4.38
Wnt5b	137.788	7.86342	25.5056	3.94e-16	2.39	1.01e-27	4.04
Wnt6	140.127	12.377	16.2959	8.02e-22	3.03	2.35e-16	3.44
Xcr1	18.7146	3.94777	0.607932	2.12e-05	3.86	0.0198	1.94
Zbp1	1480.08	556.401	176.616	3.2e-69	3.06	5.91e-22	1.45
Zeb2	5066.69	1016.14	86.5835	2.93e-224	5.86	1.95e-38	2.34
Zg16	533.983	204.131	39.0747	2.85e-62	3.72	0.131	1.26
Igfbp4	54719.5	9643.11	30546.6	3.5e-06	0.854	3.12e-165	2.54
Arrdc4	29603.6	7768.36	1697.21	6.59e-194	4.13	4.58e-85	1.97
Gpr77	23667.5	1765.83	5550.32	1.79e-38	2.1	1.39e-143	3.77
Cmah	20981.7	7062.95	2270.17	2.85e-121	3.21	1.49e-41	1.61
Cyp4b1	17077.2	2620.17	12492.6	0.00263	0.467	1.72e-13	2.67
Nceh1	16701.4	4104.27	1679.72	3.47e-107	3.32	3.24e-88	2.06
Rcn1	15916.9	11368.1	2241.99	5.62e-91	2.83	1.43e-06	0.526
Ifi27l2a	14809	2230.29	8257.71	1.8e-07	0.856	4.21e-14	2.7
Fam107b	14532.6	2913.69	6234.91	1.87e-26	1.24	1.42e-145	2.36
Celf2	11159.7	1410.94	6832.17	1.28e-13	0.724	5.5e-51	3
Creg2	9085.04	193.998	75.0803	1.24e-302	6.91	1.26e-14	5
Lhfp	7999.55	525.028	1822.41	8.12e-77	2.15	9.77e-80	3.93
Meis2	7964.08	1008.79	2405.49	5.84e-67	1.74	3.28e-88	3.01
Armcx4	6043.78	1541.88	681.168	4.4e-161	3.16	1.15e-105	2.01
Phyhd1	5342.63	1771.89	395.866	2.23e-179	3.76	8.41e-46	1.63
Naaa	4871.76	774.386	615.645	4.03e-96	2.99	2.57e-94	2.69
Arhgap42	4426.45	642.873	634.481	2.76e-49	2.8	2.81e-96	2.81
Parm1	4373.13	596.128	185.743	2.42e-127	4.53	8.6e-79	2.9
Procr	4152.38	1432.14	534.273	1.83e-122	2.96	1.14e-56	1.57
Mt1	4093.19	490.581	547.095	3.24e-101	2.91	3.19e-05	2.79
Fibin	3890.32	119.428	435.944	5.97e-81	3.16	3.07e-37	4.9
Tmem86a	3847.96	2138.21	661.716	3.6e-40	2.54	9.98e-11	0.885
Rcn3	3768.05	505.625	2265.82	7.15e-09	0.75	1.33e-116	2.93
Slc4a4	3716.71	232.054	341.077	2.15e-63	3.43	2.45e-17	3.85
Nfkbie	3614.36	1099.59	320.875	3.23e-186	3.5	6.72e-41	1.75
Bcar3	3322.35	368.008	296.649	8.65e-115	3.49	9e-96	3.2
Gstt1	2514.27	663.216	366.741	7.1e-62	2.78	2.32e-06	1.9
Slc43a2	2095.08	551.013	257.684	1.29e-84	3.03	4.11e-46	1.96
Fhdc1	2017.78	80.5689	284.48	1.37e-142	2.84	3.83e-17	4.39
Zfp709	1903.35	973.316	296.891	4.43e-52	2.68	1.04e-14	1
Ikzf2	1781.94	652.855	246.658	5.33e-88	2.85	2.33e-26	1.49
Mt2	1657.78	160.619	201.532	1.52e-59	3.04	6.67e-07	3.11
C1qtnf7	1651.7	57.5383	48.1425	3.63e-182	5.1	3.92e-11	4.37
Shisa4	1647.77	120.184	93.0865	8.03e-138	4.16	3.83e-147	3.81
Casc4	1601.38	204.496	530.517	3.43e-37	1.6	5.85e-45	2.99
Jub	1580.5	312.086	934.516	3.1e-08	0.776	3.76e-62	2.37
Art2a-ps	1511.86	28.7386	0.838563	1.2e-56	9.86	4.82e-19	5.27
Tmem229a	1473.26	21.2641	7.20999	3.72e-34	7.13	6.6e-31	5.79
Mtap7	1436.13	212.574	932.943	2.37e-06	0.635	1.32e-38	2.77
Adra1b	1398.1	33.3169	3.04857	3.61e-88	8.52	5.57e-10	4.65
Gxylt2	1369.91	55.6287	80.2474	4.38e-19	3.95	4.02e-19	4.4
Rragd	1254.17	368.065	130.12	4.25e-60	3.25	5.16e-15	1.79
Decr1	1249.98	1107.39	238.136	1.49e-54	2.39	0.0943	0.214
Fzd10	1230.71	51.8813	47.0601	1.45e-148	4.67	1e-24	4.42
Hvcn1	1166.33	281.155	196.037	2.75e-75	2.59	1.27e-54	2.09
Rassf10	1146.94	170.392	776.511	0.00148	0.577	3.21e-43	2.77
Tmem106a	1102.69	355.1	189.619	8.1e-41	2.55	3.94e-22	1.67
Dse	1067.03	102.971	368.364	2.25e-19	1.55	3.56e-52	3.39
Hs3st3a1	1028.59	97.562	11.5037	3.58e-127	6.46	4.83e-145	3.42
Cyp27a1	1014.69	428.091	139.458	5.32e-114	2.88	5.85e-35	1.29
Abca13	994.685	30.343	2.32872	4.64e-59	8.23	2.68e-67	4.98
Car8	973.552	277.473	53.5569	9.82e-58	4.12	2.71e-22	1.84
Dpyd	966.432	53.8812	33.4948	4.04e-144	4.82	1.97e-06	3.62
H2-T10	949.076	634.977	165.723	1.28e-30	2.5	7.68e-05	0.621
Zmynd15	933.111	59.214	14.409	3.06e-123	5.94	2.92e-79	3.99
Mreg	895.528	74.972	25.0028	3.52e-79	5.09	7.23e-38	3.56
Npas3	882.959	113.399	244.09	1.66e-20	1.86	8.23e-47	2.98
C1ql2	725.767	19.015	0	5.29e-35	9.6	4.22e-12	4.69
Atp6v0e2	721.357	61.2317	302.219	6.78e-18	1.27	1.47e-32	3.54
Tmem51	711.79	115.151	306.727	3.94e-17	1.22	1.59e-48	2.66
Cpxm1	693.864	88.535	14.0897	6.65e-27	5.34	2.43e-08	2.84
Uxs1	686.93	115.057	101.079	4.09e-73	2.78	6.33e-83	2.61
Impa2	676.01	225.771	94.1268	7.54e-39	2.85	5.52e-15	1.61
Pcbd1	628.593	31.0677	138.552	1.16e-42	2.2	9.41e-62	4.34
Serpina3i	610.596	17.1736	53.8675	4.46e-89	3.53	1.19e-15	4.76
Fam109b	608.437	114.36	394.31	0.000568	0.633	5.97e-23	2.42
Rhbdl3	536.037	221.817	53.8297	8.34e-42	3.31	1.44e-07	1.3
Cdk14	533.678	468.36	92.773	2.73e-35	2.52	0.413	0.225
Prkg2	524.708	29.8025	1.50585	1.43e-44	7.94	6.25e-12	3.87
Ppp1r1a	512.789	184.423	53.6143	2.51e-39	3.22	6.91e-12	1.5
Sorcs2	487.097	27.988	13.3682	5.8e-62	5.09	4.6e-63	4.12
Hdac11	485.786	69.2336	105.306	8.87e-31	2.22	5.83e-08	2.7
Tspan11	468.523	22.2575	5.32304	3.99e-28	6.13	2.69e-42	4.35
Tspan33	451.983	20.1445	38.8506	3.58e-50	3.55	4.42e-08	3.95
Fam26f	425.017	30.0496	6.29937	1.14e-56	5.91	5.65e-49	3.82
Art4	416.567	117.246	50.7827	4.35e-48	3.01	2.24e-09	1.84
Nudt17	404.949	68.0517	62.409	3.88e-47	2.68	4.42e-33	2.59
Tmem132e	398.166	10.2573	2.38807	7.44e-48	7.04	2.14e-09	4.54
Hebp1	358.366	72.1673	177.745	3.54e-05	1.02	5.94e-19	2.32
Prr16	357.571	15.2188	2.01077	5.25e-38	7.17	1.36e-41	4.5
B3galt1	352.073	41.2289	3.12362	8.49e-47	6.71	1.19e-20	3.07
Tyr	345.83	19.4086	8.80104	1.63e-43	5.11	7.02e-28	4.09
Slc16a7	345.338	73.6223	60.4435	1.19e-34	2.49	4.18e-11	2.22
Ccdc122	333.46	135.817	43.1518	9.09e-47	2.93	1.59e-15	1.33
Tmem132c	323.575	19.5423	5.05043	1.4e-47	5.83	3.89e-35	3.99
Igdcc4	321.904	55.871	39.7875	1.35e-24	3.01	1.61e-20	2.53
Arhgef10l	310.613	90.3049	20.1567	4.36e-48	3.89	1.29e-07	1.79
Crygn	302.785	9.87817	4.55442	4.23e-47	5.92	9.7e-55	4.85
Carns1	286.879	140.318	52.5719	5.65e-27	2.46	1.92e-09	1.06
Olig2	283.77	4.73472	0.838563	1.52e-30	7.64	1.68e-49	5.81
Abtb2	273.264	51.0608	12.1553	1.9e-44	4.44	1.95e-21	2.44
Serp2	273.133	40.5605	37.6105	4.78e-40	2.85	3.1e-40	2.77
Clca2	270.33	53.3311	7.95568	9.09e-51	4.9	2.91e-36	2.37
Otos	265.742	47.2064	20.3993	5.43e-36	3.67	1.17e-12	2.46
Meis3	258.62	38.8927	5.18863	2.85e-44	5.53	1.45e-24	2.74
Slc2a12	256.631	107.289	22.2095	3.44e-38	3.51	3e-09	1.29
Ptges	254.91	74.8877	35.8062	1.03e-32	2.82	5.61e-09	1.77
Serpina12	252.829	11.1378	0.274288	2.93e-26	7.84	2.18e-40	4.47
Plbd1	245.543	111.004	44.1536	4.98e-17	2.44	7.17e-08	1.17
Xlr5b	243.626	7.35066	0	7.21e-23	8.19	1.37e-30	4.92
Fam171b	216.716	27.6472	14.6536	3.65e-32	3.88	3.31e-20	2.94
Sh2d4a	216.57	81.3582	19.4505	1.82e-35	3.42	0.000211	1.42
Xlr5a	215.979	6.46168	0	4.39e-22	8.07	2.67e-31	4.95
Dbx2	203.398	3.43738	0	1.23e-21	8.01	1.77e-34	5.71
Glis1	197.387	5.15488	25.1529	3.91e-28	2.96	1.44e-31	5.14
Skor1	196.176	38.799	4.5561	4.89e-37	5.15	7.26e-19	2.33
Tmem221	194.009	60.5527	25.0397	3.94e-26	2.9	6.23e-14	1.69
Larp6	178.705	24.2136	12.5784	7.34e-34	3.77	1.78e-21	2.87
Ptpn20	176.36	5.92857	4.0338	5.45e-34	5.18	8.76e-07	4.06
Folh1	175.502	6.33784	7.90524	6.26e-28	4.31	5.14e-28	4.68
Cpa2	174.111	67.7503	12.8421	4.78e-25	3.7	0.259	1.15
Xlr5c	163.998	4.21107	0	2.4e-19	7.69	6.35e-06	4.1
Tmem132b	156.693	1.95428	2.86159	2.38e-25	5.31	4.97e-26	5.87
Zfp92	147.21	6.22254	0	2.05e-18	7.55	1.78e-06	3.85
Ppp1r26	142.977	19.6988	2.14007	8.47e-26	5.75	1.81e-18	2.85
Armcx6	138.205	78.2916	23.2677	3.93e-20	2.56	0.000237	0.863
Mab21l3	137.962	2.83854	0.274288	4.99e-20	7.04	1.89e-28	5.32
Ppef2	130.762	21.9928	20.6299	3.25e-20	2.67	2.09e-20	2.56
Rab30	130.522	34.0747	15.2946	5.02e-22	3.11	2.03e-09	1.92
Adssl1	127.41	21.4493	10.1394	3.44e-23	3.5	1.38e-17	2.56
Hs3st5	120.983	4.61561	0	2.19e-17	7.36	2.56e-25	4.58
Prokr1	119.322	7.76321	7.28292	7.48e-18	3.91	1.09e-12	3.72
Klhl32	116.252	10.5186	5.06781	1.96e-21	4.29	1.69e-19	3.38
Slc43a1	115.862	67.1117	20.3416	1.67e-16	2.47	0.00157	0.809
Fam163a	108.512	15.0873	9.133	8.62e-17	3.47	2.03e-11	2.76
Hs6st2	101.456	14.2561	6.18957	1.16e-20	3.94	6.66e-14	2.8
Zfp618	101.417	11.3141	28.4474	1.69e-09	1.82	1.88e-12	3.1
Tram1l1	96.0057	11.3495	26.9865	1.61e-07	1.81	9.45e-18	3.04
Spns3	88.8215	18.0748	8.58822	1.9e-16	3.27	1.1e-10	2.25
Dcaf12l2	85.4275	14.5949	1.38714	7.75e-18	5.45	3.64e-13	2.51
Dnahc1	80.7706	15.8412	7.0612	8.56e-16	3.46	1.44e-10	2.33
Klhl35	78.8359	14.0084	22.929	7.28e-06	1.79	5.39e-12	2.47
Ccdc81	78.6253	8.64511	25.7486	2e-06	1.62	3.83e-12	3.07
Susd1	76.3692	66.9197	12.8823	9.39e-08	2.43	0.617	0.227
Cdkl4	75.6237	9.33325	5.91695	3.98e-14	3.47	2.66e-12	2.93
Rab38	70.2679	11.9648	37.0623	0.0308	0.899	2.46e-07	2.48
Elavl2	68.6672	5.32357	0.548577	7.5e-14	5.69	1.26e-12	3.51
Ccdc37	67.2996	18.3192	4.79352	9.8e-14	3.6	6.67e-07	1.86
Odz4	63.8215	5.98432	21.4002	1.16e-05	1.57	2.47e-11	3.31
Fsd2	59.3529	3.94777	16.3252	3.46e-06	1.81	1.49e-11	3.65
Olfr98	57.664	3.49693	0.667287	2.56e-12	5.42	2.38e-08	3.71
Spnb1	57.5721	9.16785	28.4508	0.0144	1.03	9.38e-09	2.59
Art2b	56.5833	1.71987	0	3.74e-12	6.4	8.5e-14	4.65
Hsd17b14	53.5298	3.79563	6.96877	1.19e-07	2.83	1.13e-07	3.51
Stfa3	53.3267	7.94714	3.02908	1.38e-10	3.86	0.000541	2.5
Gstm6	52.9614	7.76611	4.26443	8.61e-12	3.45	5.05e-06	2.64
Pknox2	51.579	37.6842	9.49293	6.32e-07	2.37	0.316	0.486
Wdr69	51.4338	1.7638	9.26062	2.34e-08	2.46	2.28e-12	4.35
Ido2	49.3908	4.53806	0	5.47e-11	6.17	1.12e-07	3.17
Tmem63c	48.9036	3.08149	1.49015	1.95e-12	4.48	3.71e-11	3.79
Gpr25	46.7428	1.36398	0.548577	2.31e-11	5.21	8.64e-12	4.59
Pygo1	46.4983	3.24926	6.45874	4.01e-07	2.67	3.84e-10	3.6
Zfp872	45.3824	13.8156	5.9136	2.58e-06	2.85	0.000511	1.67
Rps6ka6	44.9032	22.62	4.78673	1.11e-09	3.06	0.0475	0.99
Serpina3b	44.7984	1.06766	0	8.38e-11	6.1	1.19e-11	4.78
Enox1	44.4394	11.6018	7.55933	9.78e-06	2.47	5.04e-05	1.9
Aldh1b1	44.0359	3.65616	2.82473	5.53e-09	3.6	1.95e-08	3.3
Sgcz	42.1463	1.88764	0	1.96e-10	6.02	1.52e-10	4.06
Palm3	40.8947	12.0026	4.90544	2.43e-08	2.89	0.000161	1.71
Lin28b	40.4868	3.55268	0	1.51e-09	5.85	6.83e-07	3.21
Glyatl3	39.7801	14.4357	4.80243	2.44e-08	2.93	0.00132	1.45
Mmp27	39.241	6.80521	0.667287	2.81e-10	4.95	1.53e-06	2.41
Zfp385c	39.0506	6.39122	21.0051	0.0684	0.871	1.12e-06	2.51
Ccdc96	38.9465	6.79104	3.80828	1.02e-08	3.2	5.93e-07	2.41
Dcaf12l1	38.816	19.6174	6.76442	1.34e-05	2.41	0.0403	0.986
Rfx8	38.5892	6.10053	10.0415	4.09e-05	1.88	3.72e-05	2.47
Actr3b	38.5464	19.1315	4.23304	9.6e-06	2.84	0.0639	0.981
Mum1l1	37.9454	8.26705	6.65929	1.04e-06	2.41	9.61e-05	2.11
Defb25	35.9055	5.03577	18.1422	0.0299	0.969	4.51e-06	2.7
Adam32	35.2369	27.6495	5.60959	2.36e-06	2.48	0.464	0.366
Fhod3	33.3186	22.4456	4.33437	2.6e-05	2.69	0.386	0.582
Tmem151b	32.1151	3.42175	0.941576	6.91e-09	4.36	6.55e-07	2.99
Rab36	31.3104	3.08004	14.6832	0.0391	1.04	3.03e-06	3.03
Serpina11	30.8178	0	0	1.26e-08	5.58	3.08e-09	5.43
Phex	30.3701	12.6831	3.22663	1.61e-05	3.01	0.195	1.14
Fmo6	29.0643	7.70419	4.43739	5.39e-05	2.45	0.00492	1.82
Nup62cl	28.3213	0.649852	0	2.62e-08	5.49	2.49e-08	4.44
Myadml2	28.2974	3.42648	6.6279	0.00306	1.9	3.53e-06	2.82
Olig1	28.0111	1.42354	0	3.27e-08	5.46	1.1e-06	3.75
Nxph2	27.8265	3.55885	0.333644	3.97e-08	4.9	0.00264	2.55
Exd1	27.1673	14.594	4.67992	0.000927	2.34	0.165	0.868
Mir1942	26.6782	17.5473	3.08164	4.08e-06	2.9	0.351	0.585
Hs6st3	26.2584	0.8819	0	5.46e-08	5.39	2.47e-07	4.02
Ces2f	26.0014	3.96431	0	6.48e-08	5.38	0.000128	2.47
Agbl2	25.3917	3.35983	6.99126	0.0106	1.78	0.000424	2.6
Olfr1420	24.5092	20.3216	4.10886	0.000252	2.39	0.729	0.27
Tal2	23.3128	1.65795	1.4308	4.06e-06	3.43	2.09e-06	3.4
Aipl1	22.4024	17.8701	3.85027	0.00155	2.37	0.624	0.347
Snord15b	21.4944	9.19996	1.42021	5.48e-06	3.49	0.0908	1.16
Olfr518	21.0279	0	0	4.92e-07	5.11	1.84e-07	4.96
Gpr85	20.8434	1.06766	1.51644	3.17e-05	3.24	9.73e-06	3.63
Kcnh3	19.9945	4.26681	2.08071	5.69e-05	2.96	0.00248	2.07
Acsl6	19.683	3.13724	0.274288	5.17e-06	4.38	0.0018	2.37
Ppp1r14c	19.4396	0.943819	1.51644	0.000102	3.14	1.49e-05	3.59
Slc13a4	19.3704	0.592659	2.06501	0.000454	2.77	5.63e-06	3.9
Lyz1	18.7603	3.07532	1.63515	7e-05	3.09	0.000942	2.35
Nat1	18.3679	1.5984	1.88315	0.000172	2.86	3.78e-05	3.08
Gp2	18.2177	34.257	0	3.99e-05	4.51	0.773	-0.458
Mir3058	17.6958	2.77426	6.18066	0.0373	1.4	0.00108	2.38
Odf3l1	17.5989	3.19443	0.333644	6.17e-06	4.27	0.00126	2.24
Serpinb11	17.1938	20.9972	1.38714	0.00964	2.76	0.955	-0.0996
Dlec1	16.2822	8.75622	1.51644	0.000391	2.91	0.223	0.888
Padi3	15.817	0.355885	0	6.17e-06	4.74	1.2e-05	4.02
Best3	15.3806	4.97149	1.25785	0.000455	3.15	0.0614	1.49
Gbp1	15.0234	2.0162	0.333644	7.01e-05	3.95	0.00594	2.43
Ccdc63	14.8457	1.65795	4.60487	0.0512	1.51	0.00128	2.69
Pabpc5	14.344	2.6065	0.274288	3.41e-05	4.03	0.00408	2.2
Padi1	13.6725	1.53175	0	1.74e-05	4.57	0.00205	2.63
Zfp385b	12.5863	2.12205	1.36086	0.00125	2.75	0.00803	2.19
Olfr985	12.3805	0	0	5.92e-05	4.37	4.33e-05	4.19
Dnahc11	12.1269	5.6809	0.548577	0.000581	3.32	0.291	0.99
P2ry13	11.7058	5.32974	0.667287	0.000796	3.24	0.229	1.06
Eya4	11.2151	2.60413	0.419282	0.000526	3.57	0.0362	1.85
Acsm5	10.6257	1.71751	0	8.88e-05	4.27	0.0133	2.24
Tas1r1	10.5901	2.4912	0.274288	0.000828	3.52	0.155	1.6
Ccdc113	10.4041	1.18295	0	0.000264	4.08	0.0153	2.39
Fam83c	10.2671	5.31648	0.333644	0.000476	3.56	0.278	0.889
Rimkla	9.88009	2.35173	0.333644	0.000686	3.49	0.131	1.6
Fam154b	9.62474	0.943819	4.18558	0.227	1.05	0.00441	2.65
Lrrc8e	9.60124	2.54458	1.11285	0.00619	2.62	0.0501	1.69
Frmpd1	9.47453	5.87138	1.36086	0.0106	2.37	0.604	0.621
Mir218-1	9.14013	2.84708	0	0.000271	4.06	0.24	1.34
Kcnh4	8.99632	8.39035	0.88222	0.00933	2.57	0.939	0.0918
Akr1c12	8.5491	3.90239	0.333644	0.00199	3.28	0.316	0.97
Astn2	8.43969	1.71987	0	0.000504	3.93	0.0602	1.87
Zfp114	8.38768	2.84091	0.88222	0.0096	2.52	0.121	1.37
Mrgprx2	8.34587	0	0	0.000565	3.9	0.000466	3.73
Ms4a7	8.21201	4.53334	0	0.000673	3.87	0.558	0.709
Chst10	8.1537	2.12677	0.967858	0.0184	2.42	0.097	1.62
Opn1mw	7.96833	1.48165	0.274288	0.00885	3	0.192	1.6
Mir3067	7.71242	0.296329	0.752925	0.00842	2.68	0.00254	3.1
Usp51	7.39835	4.61888	0.333644	0.00783	2.97	0.629	0.56
Fgl1	7.29304	0.649852	1.70509	0.125	1.63	0.0169	2.52
Cfhr2	7.14907	0.652215	3.67388	0.43	0.804	0.0182	2.49
Mei4	6.90229	0.948544	0	0.00168	3.64	0.0377	2.15
Ppp1r17	6.84206	0	0	0.00866	3.21	0.0137	2.9
Elfn2	6.7286	1.65795	0.752925	0.026	2.41	0.124	1.61
Tmem169	6.72595	2.70762	0.333644	0.012	2.86	0.419	0.996
Odz2	6.62213	2.43164	0.274288	0.00666	2.99	0.292	1.18
Dydc1	6.56207	0.71177	0	0.00285	3.52	0.0451	2.24
Miox	6.52132	0.590296	2.80735	0.313	1.05	0.0283	2.38
Olfr519	6.38658	0	0	0.00563	3.33	0.0069	3.1
Tmem90a	6.30608	0.355885	0	0.00246	3.55	0.011	2.76
Cd300c	6.12106	1.89709	0	0.00502	3.36	0.288	1.25
Olfr960	6.08423	0	0	0.00406	3.42	0.0045	3.21
Lrriq1	5.80751	2.19105	0	0.006	3.31	0.342	1.09
Tgm5	5.78786	0	0.333644	0.0168	2.73	0.00402	3.24
Dusp15	5.69363	3.12542	0	0.00795	3.23	0.618	0.668
Slc17a4	5.49777	0	1.09715	0.174	1.61	0.0074	3.07
Trim30e-ps1	5.49464	0.884263	0	0.00513	3.34	0.0875	1.88
Qprt	5.43696	2.42074	0.419282	0.0213	2.63	0.367	0.971
Scarna13	5.43258	5.4937	0.333644	0.0234	2.62	0.987	-0.0193
Cyp4a31	5.05678	0	0.88222	0.154	1.72	0.021	2.75
Ccdc151	5.0342	0.293967	2.24308	0.392	0.942	0.0313	2.46
Dgkk	5.02801	0	0.667287	0.179	1.74	0.0438	2.47
Oxct2a	4.90922	0	0	0.0075	3.23	0.00788	3.05
Ascl2	4.86869	4.50358	0.333644	0.0348	2.5	0.898	0.174
Ccdc158	4.86066	0	0	0.022	2.88	0.0309	2.61
Spata22	4.80854	0.293967	3.28088	0.719	0.42	0.0334	2.43
Lrguk	4.74958	0	0.667287	0.156	1.8	0.0295	2.62
Rem2	4.70218	5.13781	0.274288	0.0317	2.52	0.935	-0.105
Ano3	4.68198	0.592659	0	0.00953	3.15	0.0948	1.95
Vmn2r19	4.67114	0	0	0.0106	3.12	0.0117	2.93
Kif6	4.59515	0	0.838563	0.116	1.85	0.0103	2.97
Nphs2	4.09079	0	1.37144	0.473	0.984	0.0445	2.46
Fam19a1	4.00857	3.97139	0	0.037	2.66	0.996	0.00821
Fut1	3.79888	0.71177	0	0.0202	2.89	0.191	1.61
Ccdc155	3.52332	0	4.0181	0.891	-0.184	0.0262	2.66
Olfr658	3.19897	0.355885	0	0.0345	2.68	0.13	1.87
Has2as	3.03426	0.355885	0	0.0399	2.62	0.148	1.82
Synb	2.92341	0	0.69357	0.253	1.45	0.0461	2.44

## Sheet: 5X-DEG LN-BEC only
5X-DEGs in LN-BEC only subset with average FPKM, p-adjusted, and log2 fold-change values in LN-LEC v D-LEC, LN-LEC v LN-BEC, and D-LEC v LN-BEC.
				LN-LEC v LN-BEC		D-LEC v LN-BEC
5X-DEG	Average FPKM LN-LEC	Average FPKM LN-BEC	Average FPKM D-LEC	P-adjusted	Log2 FC	P-adjusted	Log2 FC
2017-03-04	1.37522	115.71	0.274288	3.08e-24	-5.89	7.67e-15	-7.12
A1bg	0	6.39686	0	0.00683	-3.15	0.0148	-3.71
Abcb1a	53.8419	6259.84	68.2436	4.43e-299	-6.73	3.16e-291	-6.44
Abcb1b	80.1639	558.32	111.456	1.59e-38	-2.74	3.54e-17	-2.27
Abcc3	17.6811	104.623	9.34794	1.57e-07	-2.38	6.02e-13	-3.37
Abcc4	160.757	1253.17	400.403	5.01e-46	-2.88	9.27e-27	-1.61
Abcc8	0	4.85238	0	0.0124	-2.95	0.0248	-3.47
Abcg2	1940.49	13810.9	6499.7	3.32e-156	-2.78	5.06e-16	-1.06
Ablim1	12023.3	31427.7	2712.06	3.23e-48	-1.34	9.73e-144	-3.5
Abp1	2.79606	4.19635	0	0.772	-0.393	0.0447	-3.2
Acacb	689.599	1210.93	175.687	2.97e-07	-0.771	6.61e-51	-2.74
Acan	0	16.5931	0.419282	2.69e-06	-4.7	0.000219	-4.33
Ace	106.359	3043.44	459.88	2.15e-197	-4.75	7.86e-79	-2.69
Acnat1	7.81978	22.9878	3.05536	0.266	-1.18	0.0103	-2.56
Acot11	15.9903	93.7563	18.8693	7.62e-08	-2.36	1.01e-05	-2.23
Acta2	210.666	886.495	84.7588	4.19e-14	-2	3.14e-27	-3.32
Adam15	1631.24	6799.69	1154.31	6.08e-79	-2.01	1.61e-59	-2.52
Adam23	9.72936	27.6831	2.60979	0.00988	-1.38	0.000687	-3.04
Adam28	1.08632	12.7205	0	0.0174	-2.44	0.00034	-4.85
Adamdec1	0.558743	6.0188	0	0.152	-1.84	0.0339	-3.35
Adamts12	43.7263	123.915	14.7672	3.06e-05	-1.41	2.07e-13	-3
Adamts7	122.869	345.995	27.5185	6.38e-16	-1.43	3.1e-39	-3.59
Adcyap1r1	25.2044	41.5389	5.45234	0.313	-0.609	2.57e-05	-2.81
Adh7	9.62791	29.5623	1.79072	0.0403	-1.45	0.00038	-3.47
Adhfe1	21.3169	135.829	16.3217	6.6e-13	-2.51	2.11e-07	-2.88
Aff2	0.748113	7.44561	0.333644	0.0183	-2.43	0.0176	-3.22
Agtr1a	14.6682	144.659	36.6401	4.74e-17	-3.13	6.3e-05	-1.91
Aim1	74.0526	877.875	41.6825	3.51e-59	-3.47	1.39e-83	-4.34
Aim2	6.88896	275.301	1.33457	5.58e-44	-5.11	2.76e-27	-7.17
Akap5	87.8714	541.509	98.2424	3.64e-30	-2.56	2.81e-23	-2.42
Akap6	14.2772	52.8859	9.36743	0.00316	-1.72	1.9e-05	-2.39
Akna	114.823	277.889	42.2735	2.14e-11	-1.22	3.26e-20	-2.68
Akr1b7	2.80689	6.6672	0	0.384	-0.958	0.0091	-3.89
Akr1c14	28.2856	3128.85	14.1681	7.94e-61	-6.49	1.53e-23	-7.21
Akr1c19	2.29249	94.8894	3.68446	2.39e-22	-5.01	4.43e-13	-4.31
Aldh1a7	8.55603	21.3408	1.59149	0.409	-0.96	0.00898	-3.12
Alox12	24.3465	1627.97	14.9012	3.28e-203	-5.98	6.41e-134	-6.67
Alpl	5.44708	303.967	2.64666	1.36e-52	-5.5	7.52e-37	-6.43
Ankrd29	24.3198	503.11	18.8536	1.15e-81	-4.33	1.48e-63	-4.68
Ankrd33b	55.5078	1013.47	14.1555	3.59e-92	-4.07	1.64e-98	-6.13
Ankrd36	1.85476	36.1802	0	1.57e-08	-3.75	2.02e-07	-6.25
Ankrd55	16.5654	225.272	9.35852	8.1e-20	-3.55	5.44e-25	-4.43
Ano2	0	7.3265	0	0.00154	-3.54	0.00545	-4.06
Anxa3	464.58	5752.03	1102.12	2.45e-65	-3.55	1.76e-41	-2.34
Aoc3	54.2903	505.075	10.9657	3.23e-37	-3.14	5.44e-70	-5.47
Apbb1ip	16.6201	65.6484	8.94268	1.19e-06	-1.89	4.73e-06	-2.78
Apbb2	9370.52	27722.5	2995.37	2.84e-68	-1.52	1.86e-285	-3.18
Apcdd1	8.54974	169.369	6.20183	1.2e-33	-4.12	4.48e-22	-4.51
Apln	17.5088	1045.19	4.26443	1.04e-109	-5.68	1.16e-77	-7.71
Aqp11	35.8794	143.617	18.2923	3.27e-11	-1.94	1.43e-16	-2.91
Aqp9	0.468741	8.38616	3.50092	0.0344	-2.48	0.467	-1.02
Ar	472.549	2564.47	351.384	7.63e-71	-2.39	2.61e-73	-2.83
Arap2	129.522	923.203	64.5367	2.73e-43	-2.78	3.73e-64	-3.77
Arc	4.53985	92.2553	7.0455	4.76e-11	-3.88	3.42e-10	-3.54
Areg	6.28886	18.2427	1.27522	0.689	-0.611	0.0317	-2.89
Arhgap18	738.14	9090.92	1884.07	1.9e-198	-3.57	7.06e-78	-2.24
Arhgap20	25.7816	68.2398	6.86744	0.00139	-1.3	2.13e-09	-3.17
Arhgap24	14.821	33.51	5.45234	0.0948	-1.05	0.00106	-2.47
Arhgap30	50.6585	158.261	11.0267	4.86e-07	-1.57	1.24e-18	-3.71
Arhgap4	33.8249	127.555	19.5785	1.01e-09	-1.83	8.69e-10	-2.64
Arhgdig	3.56501	6.62708	0.274288	0.621	-0.607	0.0384	-3
Arl4d	92.7519	635.432	96.5541	1.79e-65	-2.72	1.43e-32	-2.67
Arrdc5	3.50734	8.65418	0	0.571	-0.789	0.00804	-3.96
Art5	3.20596	18.3153	1.85008	0.00133	-2.26	0.00159	-2.9
Asap3	41.7202	397.422	40.4047	1.55e-40	-3.18	5.92e-18	-3.22
Asb1	23.0717	202.285	48.4016	1.89e-20	-3.03	3.03e-14	-2.03
Asb4	14.0729	1132.17	11.4498	1.45e-126	-6.15	1.33e-102	-6.48
Ascl3	9.47397	18.1912	2.11378	0.44	-0.752	0.0116	-2.69
Ass1	3.24014	27.0176	16.9997	9.5e-06	-2.81	0.323	-0.637
Atoh8	12.9575	200.99	39.4347	2.95e-23	-3.83	8.87e-12	-2.3
Atp13a5	0.775946	6.39031	0	0.235	-1.56	0.0309	-3.4
Atp1b1	1316.63	6243.14	854.526	3.39e-05	-2.09	9.93e-08	-2.75
Atp1b2	34.1362	312.334	28.4669	7.96e-42	-3.09	6.51e-39	-3.39
Atp2b2	15.4784	111.193	13.8485	5.43e-09	-2.62	2.88e-10	-2.87
Atp6v0d2	6.40043	18.4899	1.83949	0.169	-1.28	0.0118	-2.83
Atp8b1	104.898	4070.21	72.4081	4.72e-147	-5.17	9.24e-292	-5.77
Atp8b4	2.32286	17.9161	0	0.00693	-2.44	9.19e-05	-5.19
Azgp1	20.2384	69.3794	3.9359	0.267	-1.29	0.0186	-3.16
B3gnt3	275.879	1563.73	85.3175	3.79e-68	-2.45	1.6e-93	-4.14
B3gnt6	18.8694	36.1131	4.85667	0.703	-0.569	0.0326	-2.43
B4galnt1	30.5856	174.829	20.8462	1.12e-05	-2.29	3.3e-11	-3
B4galnt2	27.7024	95.7728	5.83643	0.0226	-1.57	3.25e-07	-3.75
B4galt4	587.709	3441.38	822.482	1.31e-138	-2.5	6.38e-71	-2.03
Bambi-ps1	1.69576	38.5779	0.548577	1.6e-09	-4.07	6.72e-08	-5.1
Bank1	30.5451	245.851	8.30502	7.89e-21	-2.88	3.62e-33	-4.73
Barx2	36.121	92.3	6.46218	0.114	-1.17	2.32e-05	-3.53
Bcam	666.415	3596.49	368.636	3.65e-75	-2.38	3.09e-97	-3.24
Bcl11b	10.2021	125.752	3.48355	1.65e-16	-3.47	2.34e-16	-5.04
Beta-s	35.0316	547.058	10.1814	1.31e-05	-3.38	1.47e-55	-5.59
Blk	10.6276	55.0628	1.67713	2.36e-06	-2.27	2.6e-09	-4.79
Bmp15	0.910289	38.6175	1.25785	7.53e-09	-4.44	2.78e-06	-4.48
Btbd16	1.91625	25.1603	0.274288	0.000469	-3.09	9.29e-06	-4.96
Btbd19	134.373	808.528	327.32	6.39e-53	-2.52	4.52e-15	-1.27
Btk	2.49953	20.4383	0	0.00311	-2.44	1.94e-05	-5.48
Btla	23.5236	236.452	6.37822	2.06e-15	-3.19	3.56e-28	-5.06
C1qtnf1	164.672	3397.46	344.569	6.25e-110	-4.28	1.65e-47	-3.26
C1qtnf9	49.889	3465.44	18.1812	4.3e-136	-5.96	2.13e-40	-7.25
C1s	1012.27	5090.43	462.636	1.86e-62	-2.28	5.18e-37	-3.4
Cacna1c	50.4904	99.3362	17.653	0.00257	-0.922	4.17e-09	-2.4
Cacna1i	3.41946	25.5147	14.0703	0.000228	-2.62	0.389	-0.802
Cadm1	53.613	479.591	77.5352	6.16e-48	-3.06	7.25e-19	-2.57
Cadm3	21.2072	194.503	11.6767	3.55e-14	-3.03	6.04e-24	-3.95
Camkk1	9.32901	101.537	5.14498	1.32e-17	-3.32	6.74e-13	-4.18
Car12	33.9929	100.395	11.9615	0.267	-1.2	0.000177	-2.83
Car2	107.154	1321.07	224.529	4.58e-60	-3.52	1.53e-61	-2.51
Car3	40.2723	452.181	47.3362	2.99e-17	-3.3	6.57e-18	-3.18
Car7	30.2113	448.604	137.749	3.94e-61	-3.76	4.33e-14	-1.66
Cbln1	0	22.3416	0.419282	6.78e-08	-5.16	1.37e-05	-4.79
Cbr2	23.659	52.1551	6.53379	0.235	-0.961	0.000494	-2.75
Ccdc148	8.23365	81.0346	8.75059	8.97e-13	-3.04	1.19e-11	-3.08
Ccdc19	9.05659	85.3088	14.1067	9.71e-14	-3.07	1.3e-08	-2.53
Ccdc28b	355.76	2765.34	384.505	3.37e-114	-2.91	2.49e-64	-2.8
Ccdc33	69.065	186.497	18.5602	4.88e-08	-1.37	9.25e-11	-3.23
Ccdc60	1.66539	14.3113	0	0.00385	-2.52	0.000228	-4.96
Cck	1.92761	7.23155	0	0.255	-1.33	0.0106	-3.85
Ccl11	126.799	256.59	39.2605	0.0349	-0.938	0.00944	-2.42
Ccl3	2.65854	71.8467	1.08657	0.0622	-2.31	0.00771	-3.89
Ccr6	3.17495	10.9231	0.822865	0.0995	-1.53	0.0204	-2.87
Ccrl2	353.523	504.872	95.3272	0.00398	-0.471	5.26e-27	-2.35
Cd164l2	3.89254	16.2926	2.0875	0.0819	-1.63	0.0304	-2.49
Cd180	2.0163	11.0422	0	0.0226	-2.07	0.000797	-4.64
Cd19	17.4345	182.625	3.9202	7.17e-23	-3.22	5.17e-26	-5.4
Cd200r3	0	5.78675	0	0.0249	-2.71	0.0372	-3.31
Cd28	7.45386	44.9506	31.2555	0.000105	-2.32	0.451	-0.48
Cd300lg	15294.3	67529.6	11322.7	3.92e-67	-2.09	2.6e-67	-2.54
Cd34	887.142	56500.2	2342.87	8.08e-83	-5.83	4e-298	-4.56
Cd3d	5.30591	57.8842	1.11285	8.39e-11	-3.24	1.85e-10	-5.25
Cd3e	10.533	110.945	6.56351	9.06e-15	-3.15	0.0226	-3.09
Cd3g	5.40293	49.1063	1.25785	4.51e-05	-2.85	1.96e-08	-4.91
Cd48	10.1577	66.5034	4.33737	2.78e-08	-2.56	0.0724	-2.7
Cd52	56.379	349.798	15.4833	3.39e-45	-2.57	1.91e-48	-4.47
Cd69	4.23276	57.5086	2.09641	8.29e-12	-3.55	3.73e-09	-4.58
Cd7	0.434561	11.0726	0.607932	0.00293	-3.1	0.0118	-3.19
Cd79a	9.08371	84.0686	7.37236	3.65e-10	-3.01	8.43e-11	-3.38
Cd83	12.7413	86.7325	2.02814	2.18e-06	-2.55	2.63e-12	-5.03
Cd84	13.6297	108.384	16.1294	1.83e-07	-2.8	1.48e-05	-2.63
Cd8a	4.5545	31.5103	1.24215	0.000414	-2.42	1.38e-05	-4.06
Cd8b1	3.48465	29.6406	1.66143	0.00013	-2.75	2.03e-05	-3.73
Cd93	10597.2	80478.1	3233.74	3.63e-105	-2.87	1.85e-136	-4.59
Cd96	0.748113	35.3735	0.838563	1.05e-09	-4.63	3.16e-07	-4.88
Cdc42ep4	512.766	5066.1	523.646	9.47e-97	-3.25	1.04e-183	-3.24
Cdh23	45.685	96.1782	8.89558	0.00441	-1.02	2.9e-14	-3.32
Cdh8	1.40305	14.2532	0.822865	0.004	-2.59	0.00358	-3.28
Ceacam1	136.032	3272.86	580.195	1.89e-19	-4.3	8.39e-61	-2.46
Chek2	379.026	1271.88	236.746	4.02e-36	-1.7	2.06e-40	-2.39
Chga	0.558743	14.9617	0.838563	0.000152	-3.57	0.00153	-3.58
Chst3	4.6655	52.2326	2.09641	1.95e-06	-3.11	5.74e-07	-4.33
Chst4	35.6806	4138.2	82.8679	7.12e-220	-6.68	2.96e-20	-5.37
Cidec	5.45448	69.135	2.2257	1.07e-05	-3.11	9.75e-11	-4.69
Ciita	36.0264	92.424	12.6814	0.00108	-1.28	5.49e-09	-2.75
Cited2	527.632	1921.33	282.437	9.48e-14	-1.8	1.25e-41	-2.72
Ckmt1	40.1186	95.8763	10.4087	0.321	-1.01	0.000305	-2.96
Cldn3	27.0754	78.8086	9.89484	0.0673	-1.34	0.000146	-2.8
Clec12a	2.33049	17.6911	0.752925	0.00316	-2.42	0.000571	-3.83
Clec2i	2.23429	17.9471	0	0.00816	-2.44	9.9e-05	-5.18
Clrn1	0	5.55706	0	0.0121	-2.97	0.0228	-3.52
Clstn2	0.279371	6.37323	0.822865	0.0166	-2.73	0.14	-2.12
Cml1	47.7607	67.7588	12.2829	0.249	-0.459	7.32e-07	-2.4
Cmtm2b	0	10.6698	0	0.000362	-3.88	0.00171	-4.45
Cngb1	59.1277	277.315	52.8351	2.52e-21	-2.18	8.8e-20	-2.35
Cnksr1	4.75098	20.8826	2.603	0.00544	-1.88	0.000961	-2.72
Cnn1	13.5934	26.2956	2.18372	0.188	-0.849	0.000276	-3.18
Col13a1	39.2106	1487.31	79.2196	1.77e-187	-5.2	4.87e-125	-4.18
Col25a1	7.04283	18.4519	2.15744	0.0607	-1.27	0.00458	-2.7
Col4a1	8436.33	45190	15784.5	1.03e-124	-2.37	6.99e-22	-1.49
Col4a2	8690.64	49857.4	14694.3	8.6e-82	-2.47	2.1e-21	-1.73
Coro2b	82.8756	777.515	72.4488	4.2e-47	-3.14	3.17e-45	-3.37
Cpa3	2.55154	50.6133	3.18298	0.000168	-3.37	0.0722	-2.72
Cpm	36.0775	148.384	15.9406	4.54e-08	-1.92	5.67e-10	-3.07
Cpxm2	16.0303	161.903	74.1997	0.00086	-2.78	0.0116	-1.08
Crb3	7.17834	17.0592	1.57579	0.236	-1.03	0.0062	-2.91
Crispld1	5.38495	373.113	1.86578	3.38e-62	-5.8	2.74e-35	-7.38
Crp	2.5097	61.1447	0.607932	7.71e-10	-4	8.78e-10	-5.67
Csmd1	111.805	161.728	26.3561	0.106	-0.494	8.35e-13	-2.55
Cspg4	2.95442	51.7564	3.51151	1.07e-11	-3.74	1.79e-08	-3.63
Cst7	4.95674	18.7809	2.27615	0.0209	-1.69	0.0106	-2.63
Cstad	34.1912	73.5993	12.2095	0.00439	-1.06	1.45e-08	-2.48
Ctnna3	0	3.90856	0	0.0302	-2.63	0.049	-3.14
Ctsc	89.1299	338.348	24.0732	3.23e-16	-1.85	1.69e-42	-3.75
Ctse	1.98593	7.49427	0	0.179	-1.46	0.00664	-4.01
Cuzd1	7.17996	21.9022	1.70509	0.276	-1.21	0.00304	-3.08
Cx3cl1	107.968	805.355	44.9804	3.06e-54	-2.82	2.21e-75	-4.12
Cxcl11	2.78843	42.0185	1.37144	2.7e-09	-3.57	1.65e-07	-4.3
Cxcl12	1586.79	36056.6	1065.29	6.41e-161	-4.44	4e-298	-5.04
Cxcl5	4.57732	8.64183	1.11285	0.493	-0.737	0.0475	-2.46
Cxcr2	2.11011	7.23064	0	0.3	-1.25	0.013	-3.77
Cxcr4	81.5952	2145.08	19.3005	9.57e-142	-4.63	3.68e-152	-6.79
Cybb	20.1108	100.782	10.5337	4.69e-08	-2.16	2.71e-08	-3.12
Cyp11a1	0	18.0465	0	9.11e-07	-4.84	3.85e-05	-5.33
Cyp2b10	5.39881	18.2469	1.67713	0.122	-1.41	0.0136	-2.92
Cyp2d11	1.7509	14.0949	3.24401	0.0119	-2.42	0.0768	-1.84
Cyp2d22	360.165	2962.47	931.367	1.8e-108	-2.98	9.02e-28	-1.63
Cyp3a13	0	5.15252	2.45801	0.0427	-2.48	0.638	-0.766
Cyp4f18	2.79991	19.2247	5.7754	0.00156	-2.37	0.123	-1.57
Cytip	43.7439	574.938	19.0923	5.91e-49	-3.63	7.1e-46	-4.87
Cytl1	21.6139	1314.28	5.89958	1.08e-25	-5.5	6.81e-37	-7.41
Cyyr1	132.641	1158.7	139.264	6.72e-73	-3.07	1.02e-74	-3.01
Daam2	25.5358	112.21	15.5392	7.67e-11	-2.03	2.74e-12	-2.75
Dach2	4.18525	40.905	4.3132	7.1e-07	-2.96	1.36e-05	-3.08
Dcbld1	130.591	1652.56	100.955	3.82e-170	-3.6	6e-97	-4.01
Dclk1	523.327	12413.8	705.544	1.7e-133	-4.49	1.81e-115	-4.09
Ddi1	0	3.60842	0.274288	0.0444	-2.47	0.174	-2.2
Def6	74.8784	522.953	99.1529	1.67e-35	-2.71	6.18e-39	-2.36
Defb1	3.29962	32.9718	0	0.00165	-2.67	1.01e-06	-6.03
Dennd1c	6.08808	33.8782	1.17221	0.000133	-2.23	4.86e-07	-4.46
Deptor	89.3059	297.731	29.6394	2.18e-16	-1.7	2.89e-25	-3.23
Dgkb	3.16543	17.8796	0.822865	0.0102	-2.08	0.00114	-3.57
Dgkg	13.182	23.924	2.87729	0.431	-0.684	0.00178	-2.73
Dlg3	266.605	1602.96	417.61	2.49e-62	-2.54	2.82e-31	-1.9
Dlk1	1.73375	13.7159	0	0.0148	-2.34	0.000552	-4.77
Dlk2	2.57568	24.0723	2.98031	4.92e-05	-2.8	0.00138	-2.67
Dmbt1	12.0671	37.4122	4.00073	0.128	-1.34	0.00776	-2.77
Dmd	601.044	2742.57	249.305	4.33e-36	-2.13	1.88e-106	-3.42
Dmp1	0	8.88329	1.00093	0.00563	-3.22	0.155	-2.18
Dnahc2	1.8756	20.1151	12.1396	0.000811	-2.72	0.376	-0.658
Dnahc7a	0	5.62462	0.333644	0.00712	-3.13	0.0578	-2.78
Dner	0.748113	27.8117	1.00093	5.1e-08	-4.29	1.36e-05	-4.17
Dnm3	127.935	902.736	234.89	2.68e-36	-2.75	5.52e-17	-1.9
Dnm3os	154.831	990.339	392.458	1.36e-32	-2.61	6.68e-09	-1.3
Dock2	13.2069	103.201	2.34441	3.62e-17	-2.84	5.99e-17	-5.32
Dock8	74.9126	698.576	183.187	3.3e-77	-3.16	1.86e-20	-1.9
Dok7	0	5.0688	0	0.0168	-2.85	0.0296	-3.4
Dpep2	3.62979	7.79205	0.69357	0.497	-0.834	0.0369	-2.73
Dppa2	0	3.49076	0	0.0377	-2.54	0.0593	-3.04
Drd1a	1.25485	23.5667	5.17805	1.77e-05	-3.42	0.0181	-2.03
Dsp	26.0604	61.9667	9.43357	0.189	-1.05	0.00026	-2.54
Dusp23	151.488	667.378	48.0293	8.44e-43	-2.09	8.02e-69	-3.74
Dusp26	26.9217	273.082	8.51661	3.74e-13	-3.12	1.91e-33	-4.97
Dusp27	26.013	176.266	5.40524	4.33e-10	-2.65	7.38e-24	-4.76
Ear1	0	16.4008	0.419282	0.00035	-3.95	0.00572	-3.79
Ear6	0	5.78675	0	0.0249	-2.71	0.0372	-3.31
Ebf3	1438.01	8605.9	1260.7	9.74e-85	-2.53	4.65e-91	-2.73
Eci3	5.36792	11.4146	1.57579	0.264	-0.921	0.0227	-2.43
Ecm1	145.874	1134.45	326.498	3.87e-64	-2.9	3.92e-17	-1.76
Ednra	62.4585	309.167	28.9828	3.6e-14	-2.22	1.17e-17	-3.34
Eepd1	42.7734	1028.15	60.3409	2.83e-101	-4.44	6.76e-54	-4
Efhd1	38.9043	2266.8	11.9213	1.19e-45	-5.59	4.97e-39	-7.28
Efnb1	314.426	2815.36	147.452	3.08e-107	-3.11	1.29e-139	-4.22
Efr3b	53.9833	3030.15	12.1451	4.43e-299	-5.7	4.7e-186	-7.75
Ehbp1l1	201.706	1157.49	254.058	8.37e-68	-2.46	1.54e-37	-2.15
Ehd4	2838.56	12849	2257.87	2.72e-67	-2.13	1.85e-78	-2.47
Elane	1.3967	23.3074	0	0.242	-1.53	0.000454	-4.93
Eltd1	1700.38	12792.8	2232.33	5.06e-174	-2.86	2.36e-90	-2.48
Emb	16.3863	56.7989	4.87069	0.000927	-1.64	5.85e-06	-3.35
Emp2	336.638	2525.21	129.654	6.39e-61	-2.84	4.34e-88	-4.24
Emp3	115.943	1244.38	164.025	4.45e-74	-3.35	5.03e-30	-2.88
Endou	1.96878	501.457	2.09641	1.19e-62	-7.39	3.89e-08	-6.31
Eno4	8.93864	36.8135	5.89958	0.000308	-1.89	0.00011	-2.49
Enthd1	0	6.74238	0	0.0025	-3.42	0.00769	-3.94
Entpd1	81.1907	7064.3	22.859	4.43e-299	-6.36	4e-298	-8.18
Epas1	7798.48	49085	11264.5	7.69e-146	-2.61	3.31e-69	-2.09
Epha4	421.935	1274.81	205.661	1.19e-47	-1.55	2.09e-19	-2.57
Epha6	0.313552	10.8187	0	0.000557	-3.52	0.000865	-4.61
Ephx3	7.4982	56.8204	5.89067	1.06e-06	-2.66	6.44e-07	-3.05
Epn3	3.4238	8.74913	0.548577	0.398	-0.973	0.031	-2.89
Eppk1	97.3355	230.283	28.5915	0.34	-0.989	0.0147	-2.6
Eps8	66.4342	679.141	313.174	3.82e-43	-3.25	5.85e-10	-1.08
Eps8l2	35.9243	719.136	47.1984	1.09e-89	-4.23	4.77e-53	-3.89
Epx	0.744939	38.4542	0.752925	7.61e-06	-4.13	3.06e-05	-4.67
Esam	682	13665.8	882.369	1.69e-200	-4.26	1.48e-173	-3.91
Esm1	25.6448	3437.49	6.22264	9.8e-294	-6.87	2.2e-152	-8.99
Esrrg	62.0284	380.604	15.4226	7.13e-25	-2.55	6.1e-40	-4.52
Evpl	6.23005	43.5102	6.98615	1.72e-07	-2.57	8.95e-06	-2.51
F10	0.592923	29.3107	2.18372	3.16e-08	-4.58	3.16e-05	-3.37
F2rl2	4.14725	28.8935	9.50351	1.38e-05	-2.55	0.0153	-1.51
F2rl3	10.1328	130.523	6.01829	2.75e-23	-3.51	5.01e-21	-4.3
F7	2.9304	10.5876	0.333644	0.0722	-1.56	0.00324	-3.73
Fabp7	1.7166	8.65037	0	0.149	-1.64	0.00419	-4.17
Fabp9	3.99957	21.4357	0.274288	0.0226	-1.95	0.000114	-4.62
Fam101b	638.243	8768.66	372.518	3.11e-234	-3.72	4e-298	-4.53
Fam107a	46.2398	557.986	52.7401	1.02e-38	-3.52	1.59e-32	-3.33
Fam115c	596.268	951.325	168.894	1.09e-05	-0.633	1.11e-20	-2.43
Fam196b	2.61303	14.7149	0	0.00507	-2.18	0.000149	-5.04
Fam19a2	0.782293	178.058	0.274288	5.41e-28	-6.9	1.08e-17	-7.68
Fam24a	1.88894	3.95486	0	0.56	-0.755	0.0455	-3.18
Fam46a	230.325	591.003	68.4253	3.03e-06	-1.29	1.03e-17	-3.05
Fam69a	203.723	726.94	100.289	1.15e-28	-1.78	6.45e-28	-2.79
Fam70a	15.819	281.081	43.8946	4.62e-26	-4.03	1.9e-25	-2.64
Fam70b	9.1788	942.124	12.9349	1.21e-134	-6.4	1.38e-80	-5.99
Fam71d	5.93301	11.4648	1.36086	0.284	-0.848	0.0128	-2.65
Fam78b	297.232	786.208	153.497	5.89e-16	-1.35	6.5e-42	-2.32
Fam81a	1.69957	11.6472	0	0.0144	-2.23	0.000815	-4.64
Fam83g	1.08632	17.6967	1.8238	0.00246	-2.88	0.00361	-2.82
Fam89a	5.29574	76.3969	13.0481	1.37e-14	-3.6	1.4e-07	-2.44
Fbxo40	0	6.44696	0	0.00323	-3.35	0.00925	-3.87
Fcer1a	0.155189	32.6477	0	0.0356	-2.55	0.128	-2.55
Fcnb	0	5.01542	0	0.017	-2.85	0.0299	-3.4
Fcrl1	0.7551	20.091	0.419282	3.75e-06	-3.83	3.74e-05	-4.63
Fcrla	3.45548	48.4366	1.02721	4.38e-07	-3.27	2.77e-09	-5.01
Fez1	1.94793	28.7759	1.08657	3.36e-06	-3.42	1.13e-05	-4.19
Ffar2	1.21368	16.1485	0.752925	0.000679	-2.91	0.000681	-3.75
Fgd3	0.155189	5.61517	0.274288	0.0164	-2.75	0.0459	-2.88
Fgf9	11.9755	81.2296	65.5418	2.36e-05	-2.51	0.614	-0.273
Fgfr3	773.606	1132.33	211.521	7.02e-05	-0.507	2.05e-54	-2.39
Fgr	10.9639	126.506	3.24401	7.62e-17	-3.34	4.49e-18	-5
Fhl5	1.10982	15.1398	0.274288	0.000351	-3.11	0.000332	-4.28
Fjx1	15.5952	254.28	4.36577	4.5e-40	-3.95	5.93e-34	-5.77
Flt1	194.755	14896.9	60.8157	4.43e-299	-6.17	4e-298	-7.83
Fnbp1l	2518.95	11010.4	1862.22	6.5e-80	-2.08	2.92e-64	-2.53
Foxa1	13.1172	46.5892	0	0.536	-0.9	8.4e-07	-6.18
Foxd2	1.53422	13.0136	3.63022	0.00597	-2.44	0.0983	-1.63
Foxn4	0.155189	5.79711	2.00186	0.0175	-2.74	0.479	-1.13
Foxp3	1.78258	4.61416	0	0.376	-1.03	0.0287	-3.41
Frk	110.866	216.17	30.6278	2.88e-07	-0.917	9.36e-23	-2.79
Fut2	192.091	406.097	72.6001	8.41e-07	-1.04	1.7e-22	-2.43
Fut4	420.135	1189.7	166.086	3.12e-20	-1.46	2.12e-49	-2.8
Fut9	2.48303	12.5689	0	0.292	-1.38	0.00267	-4.36
Fzd4	118.561	820.074	354.624	4.46e-46	-2.73	5.12e-13	-1.17
Gabra2	2.20884	45.3722	0	2.2e-08	-3.95	1.95e-08	-6.57
Gabre	1.42337	10.1069	0.667287	0.0163	-2.29	0.0133	-3.08
Gal	2.01746	14.2841	0.333644	0.178	-1.69	0.00719	-3.72
Galnt5	2.65155	11.1855	0.274288	0.171	-1.48	0.00355	-3.77
Galntl1	11.755	38.5874	2.41435	0.00184	-1.59	7.28e-07	-3.72
Gapt	2.47182	14.0217	0	0.027	-2.05	0.000277	-4.91
Gbp10	25.0541	45.5267	5.75291	0.0625	-0.801	2.94e-05	-2.85
Gbp4	1835.09	8057.67	420.169	2.31e-47	-2.08	1.4e-79	-4.2
Gca	143.513	417.69	54.597	6.9e-14	-1.5	3.55e-25	-2.87
Gcgr	0.279371	12.5518	0.88222	0.000374	-3.64	0.00892	-3.05
Gcnt1	10810.5	37265.5	4105.25	5.81e-45	-1.74	1.96e-89	-3.14
Gcnt2	96.5367	1395.78	116.919	1.86e-119	-3.8	1.4e-79	-3.53
Gda	112.522	5208.05	69.4723	4.43e-299	-5.46	2.77e-289	-6.17
Gdpd2	0.62393	12.875	2.31302	0.000627	-3.21	0.0548	-2.07
Ggh	1642.36	2852.54	434.462	0.506	-0.653	0.000949	-2.51
Ggt5	78.8298	2216.07	39.0905	6.61e-114	-4.71	1.05e-112	-5.76
Gimap3	75.1361	614.929	92.0595	6.84e-35	-2.94	9.61e-25	-2.68
Gimap7	12.3854	25.9736	3.6879	0.172	-0.932	0.0124	-2.54
Gipr	0	14.627	0.333644	2.12e-05	-4.4	0.000878	-4.11
Gkn3	4.83014	159.412	1.64573	1.01e-20	-4.66	1.56e-07	-5.47
Glb1l2	0.279371	7.52933	3.03798	0.0218	-2.68	0.464	-1.06
Glb1l3	2.66806	17.9075	0	0.00628	-2.26	6e-05	-5.26
Gli3	63.9212	530.578	69.7033	6.78e-20	-2.95	1.12e-22	-2.88
Glul	32363.3	73864	10861.6	9.4e-22	-1.15	8.32e-97	-2.73
Golm1	227.261	1652.49	158.863	2.18e-50	-2.81	1.41e-91	-3.34
Gp49a	0.779119	12.8582	3.25292	0.0345	-2.46	0.268	-1.56
Gpc4	85.2358	613.121	192.366	6.45e-36	-2.76	1.24e-12	-1.64
Gpr1	2.73456	156.647	14.5786	5.9e-27	-5.18	1.07e-18	-3.37
Gpr17	0.155189	40.7557	0.274288	2.32e-11	-5.53	2.61e-08	-5.69
Gpr174	4.24107	26.3389	1.66143	0.00187	-2.28	0.000127	-3.54
Gpr18	29.3691	54.7068	9.35473	0.116	-0.84	0.000161	-2.41
Gpr20	2.70553	8.57046	0.274288	0.236	-1.31	0.00937	-3.46
Gpr37	1.11681	8.57755	0	0.036	-2.21	0.00257	-4.3
Gpr56	313.088	5345.6	267.86	1.92e-162	-4.02	8.16e-142	-4.28
Gpr65	0.465567	12.2918	3.63022	0.0012	-3.17	0.094	-1.58
Gpr68	25.1128	191.976	12.5258	6.62e-26	-2.82	3.33e-29	-3.85
Gprin3	11.3201	120.683	42.3286	1.57e-12	-3.22	2.42e-05	-1.47
Gpx8	65.1766	1089.99	86.8157	1.41e-93	-3.97	1.02e-31	-3.58
Grap2	0.310378	5.07589	0	0.0772	-2.15	0.027	-3.44
Grin2a	0	5.5627	2.78107	0.00699	-3.13	0.546	-0.832
Grin2d	6.7988	37.2744	2.45801	0.000156	-2.18	1.38e-06	-3.57
Grip2	3.0786	92.4051	0.548577	1.39e-19	-4.54	9.41e-14	-6.32
Grrp1	1514.44	4644.71	637.689	7.89e-28	-1.57	2.83e-78	-2.83
Gse1	159.237	972.515	120.913	7.61e-66	-2.56	4.92e-58	-2.98
Gstm2	241.891	1188.85	156.707	1.2e-35	-2.23	1.88e-24	-2.87
Gstm7	48.444	127.141	15.019	2.16e-05	-1.31	7.55e-12	-2.99
Gstt3	110.331	830.523	67.1838	1.32e-31	-2.82	1.51e-51	-3.56
Guca1a	5.5276	35.7205	5.22338	3.95e-05	-2.39	0.000159	-2.55
Gulo	4.11239	59.9865	0.274288	1.25e-10	-3.55	1.81e-10	-6.22
Gulp1	46.6245	759.538	100.231	1.62e-90	-3.97	1.56e-41	-2.87
Gzmb	0.775946	7.44561	0	0.0717	-2.05	0.00472	-4.11
Gzmc	0	9.11592	0	0.00213	-3.48	0.00564	-4.09
H2-Aa	380.216	1584.01	99.7593	5.55e-06	-1.94	4.72e-76	-3.95
H2-DMa	32.6387	82.6117	9.526	0.0019	-1.25	1.24e-10	-3.02
H2-Eb1	303.877	761.979	79.3714	0.0184	-1.22	2.2e-72	-3.23
H2-Eb2	1.84078	26.2501	0	2.54e-06	-3.3	2.12e-06	-5.86
H2-M2	18.6041	194.128	3.60226	5.13e-23	-3.31	8.02e-26	-5.71
H2-M9	0.279371	7.04671	0	0.0143	-2.79	0.00892	-3.9
H2-Ob	33.4136	494.011	8.24064	4.88e-38	-3.75	0.00134	-4.3
Haao	5.24045	24.6635	0.667287	0.00862	-1.89	1.26e-05	-4.42
Hamp	23.4294	969.652	6.95475	4.97e-12	-4.74	2.27e-62	-6.85
Hap1	890.623	2510.49	199.591	1.93e-29	-1.45	1.43e-109	-3.62
Hapln3	3.57517	39.4542	4.00073	3.85e-07	-3.04	9.83e-05	-3
Hapln4	9.44325	21.1574	1.88315	0.425	-0.877	0.00996	-2.9
Hbegf	111.775	838.279	81.2083	6.79e-49	-2.83	3.25e-69	-3.32
Hck	2.88923	13.9489	0.941576	0.0145	-1.93	0.00304	-3.23
Hcn4	0.155189	8.82995	0	0.00376	-3.19	0.00411	-4.18
Hcrtr1	0.468741	5.84722	0.274288	0.034	-2.38	0.0416	-2.93
Hdac9	36.3234	470.154	57.9784	2.92e-57	-3.6	1e-48	-2.97
Heg1	324.25	2100.08	346.178	4.16e-58	-2.64	3.37e-40	-2.56
Hemk1	16.6019	107.788	3.68957	2.22e-10	-2.55	2.88e-19	-4.68
Hepacam	6.88828	15.5364	1.72078	0.152	-1.04	0.00332	-2.83
Hepacam2	3.66465	15.6853	2.18372	0.0287	-1.82	0.00885	-2.48
Hephl1	0.32054	4.3131	0	0.0671	-2.22	0.0335	-3.33
Hey2	9.05398	112.495	21.6435	1.5e-19	-3.42	7.04e-08	-2.32
Hfm1	3.93704	19.0655	0.667287	0.0103	-2	0.000312	-3.97
Hgfac	4.33409	42.3181	0.333644	5.43e-06	-2.87	1.75e-08	-5.72
Higd1b	3.24447	46.748	1.38714	6.72e-08	-3.32	3.44e-09	-4.67
Hils1	0	4.71292	0	0.0454	-2.46	0.0621	-3.03
Hist4h4	14.1033	78.8786	30.3254	1.15e-08	-2.34	0.00137	-1.31
Hk3	3.84756	26.5862	6.84627	0.000473	-2.4	0.0205	-1.84
Hlx	233.849	1261.89	199.959	6.83e-55	-2.37	6.38e-45	-2.62
Hoxa1	5.2886	59.1821	14.7341	8.32e-08	-3.09	0.000391	-1.93
Hoxc10	2.22731	7.40168	0	0.19	-1.38	0.00575	-4.05
Hoxc8	18.4976	36.6818	3.23722	0.0601	-0.926	6.72e-06	-3.24
Hrasls5	1.15167	10.3399	0	0.0197	-2.4	0.00119	-4.53
Hrct1	44.9646	376.616	59.9301	7.99e-22	-2.95	4.43e-13	-2.58
Hrh1	0.627104	19.1926	3.18298	7.04e-05	-3.76	0.0347	-2.29
Hrh2	0	5.91622	0	0.00464	-3.25	0.0121	-3.77
Hsd11b2	3.89571	30.7154	1.4465	8.25e-05	-2.59	3.69e-06	-4.02
Hspb1	778.396	5355.43	1691.04	4.86e-44	-2.71	4.11e-24	-1.63
Htr2a	0.468741	6.98479	0.274288	0.0245	-2.52	0.0304	-3.09
Icam5	0.62393	13.4904	1.27522	0.000372	-3.28	0.00792	-2.86
Id3	592.113	5772.93	2195.1	8.58e-148	-3.23	7.76e-23	-1.36
Ifnk	2.35451	10.9576	0.838563	0.0877	-1.7	0.0193	-3
Igdcc3	1.73375	11.3433	0	0.014	-2.21	0.000661	-4.68
Ikzf1	75.613	313.659	15.2336	1.87e-16	-1.99	7.27e-25	-4.31
Ikzf3	4.02677	37.4985	0.333644	1.06e-05	-2.79	6.4e-08	-5.56
Il10ra	10.1366	40.8922	2.60979	0.000167	-1.85	8.69e-06	-3.6
Il15	476.041	4765.42	247.016	3.33e-182	-3.27	6.78e-209	-4.22
Il18bp	828.879	1688.99	296.086	1.14e-18	-0.981	3.2e-56	-2.47
Il18r1	8.55804	103.555	16.5961	1.51e-14	-3.35	2.4e-08	-2.58
Il18rap	0.62393	32.4158	0	3.11e-08	-4.47	7.9e-07	-6.06
Il1r1	3361.26	17776.7	926.48	9.36e-62	-2.35	9.08e-190	-4.22
Il1rl2	1.63438	10.4089	0.333644	0.0278	-2.14	0.00428	-3.68
Il22ra2	7.55077	11.9946	1.00093	0.56	-0.525	0.0156	-2.9
Il28ra	6.17487	21.2026	2.12437	0.0512	-1.5	0.00259	-2.88
Il2ra	4.419	53.7107	0.941576	3.53e-10	-3.4	2.59e-10	-5.19
Il2rb	0.900128	9.04401	0.941576	0.0214	-2.33	0.0284	-2.63
Il31ra	32.3051	81.2385	8.3381	0.00177	-1.26	3.79e-08	-3.11
Il5ra	0.940656	8.75713	0.419282	0.0373	-2.3	0.01	-3.39
Il7r	4.0883	80.3061	3.45727	8.12e-14	-4	1.03e-11	-4.4
Inpp5j	9.17801	17.9544	2.57672	0.44	-0.757	0.0248	-2.39
Insr	1693.23	8227.09	1575.86	1.2e-119	-2.23	1.89e-57	-2.35
Irf4	42.6981	150.125	24.7739	1.97e-07	-1.73	1.26e-10	-2.5
Itga6	750.106	4733.15	1844.52	2.49e-86	-2.6	1.9e-27	-1.33
Itga7	9.06033	68.2654	14.6854	1.68e-10	-2.73	7.59e-05	-2.12
Itgb5	32.6763	335.1	64.1738	5.27e-34	-3.24	2.06e-15	-2.33
Itih5	1755.59	10573.8	3175.24	6.1e-126	-2.54	2.13e-63	-1.71
Itk	3.46565	30.9441	1.93572	9.35e-05	-2.69	1.92e-05	-3.6
Jag2	137.602	721.54	83.5196	1.77e-66	-2.34	5.51e-58	-3.07
Jakmip1	0.620757	9.87962	0	0.0119	-2.62	0.00132	-4.5
Jam2	311.231	20175	149.227	1.36e-283	-5.93	4e-298	-7.01
Jph2	2.17212	21.8751	0	0.000131	-2.81	8.69e-06	-5.61
Kank4	7.93011	205.909	13.4343	7.18e-23	-4.32	1.95e-30	-3.84
Kazn	303.901	842.91	135.741	3.59e-17	-1.43	9.29e-36	-2.6
Kbtbd13	25.8063	38.4764	5.45401	0.474	-0.477	0.00019	-2.61
Kcna3	0	9.10357	0	0.000321	-3.88	0.00187	-4.39
Kcna5	13.2977	407.917	11.3659	3.95e-55	-4.78	2.74e-35	-4.95
Kcnb1	76.0469	895.436	19.8337	8.86e-70	-3.5	2.72e-70	-5.38
Kcnc2	5.38892	198.249	3.7858	3.6e-33	-4.98	1.68e-25	-5.43
Kcne3	53.6925	418.315	89.0598	3.61e-33	-2.9	2.66e-21	-2.2
Kcng4	10.5268	26.8578	2.93665	0.126	-1.16	0.000538	-2.9
Kcnip3	5.16823	22.1569	0.69357	0.0946	-1.63	0.000241	-4.11
Kcnj15	896.711	1462.83	224.658	5.72e-09	-0.665	2.18e-71	-2.66
Kcnk1	41.9423	117.82	8.2215	0.306	-1.13	0.00849	-3.14
Kcnq1	9.72341	759.668	10.5812	7.47e-87	-5.94	6.92e-86	-6.02
Kcnq4	0.94447	4.89867	0	0.156	-1.65	0.0245	-3.48
Kcns3	7.153	9.63667	1.15651	0.709	-0.356	0.0356	-2.46
Kcnt1	3.59232	10.7757	1.00093	0.183	-1.27	0.0289	-2.73
Kctd12b	496.598	4790.23	227.547	4.46e-176	-3.22	5.11e-101	-4.34
Kif5c	28.8589	179.502	14.9995	7.98e-13	-2.5	3.89e-26	-3.51
Kirrel2	0	11.3489	0	0.000279	-3.94	0.0014	-4.51
Kirrel3	33.7857	361.505	49.3761	1.07e-54	-3.36	1.7e-31	-2.81
Kit	620.081	4904.73	227.994	1.12e-174	-2.93	1.92e-170	-4.38
Klhl14	0.434561	5.72811	0	0.0419	-2.33	0.0157	-3.67
Klk10	1.18267	23.8091	3.35082	1.59e-05	-3.53	0.0224	-2.39
Klk11	0	14.809	0.838563	2.43e-05	-4.39	0.0043	-3.44
Klk1b27	0.634092	6.3402	0	0.0567	-2.22	0.0139	-3.73
Klk1b9	1.37204	13.9701	0	0.00209	-2.68	0.000225	-4.95
Klk8	2.65737	121.26	6.88314	1.72e-24	-5.29	2.62e-18	-4.03
Klra8	0	3.95013	0	0.0326	-2.6	0.0514	-3.12
Klrd1	3.56199	27.0507	1.66143	0.000194	-2.57	6.94e-05	-3.59
Klrg1	1.34104	6.93469	0	0.237	-1.51	0.0317	-3.4
Klrg2	6.01535	44.3013	1.83949	1.87e-07	-2.71	4.43e-08	-4.29
Klri2	1.67607	18.3357	0	0.00341	-2.61	3.22e-05	-5.36
Kremen2	2.29249	45.7971	4.39373	2.15e-11	-3.95	8.6e-07	-3.15
Krt222	50.6126	327.72	45.0906	3.7e-43	-2.62	2.11e-26	-2.83
Krt5	3.26352	9.98219	0.419282	0.305	-1.21	0.0154	-3.35
Krt79	2.14497	10.1674	0.69357	0.0897	-1.75	0.00872	-3.15
Kynu	5.95401	18.4245	1.33457	0.0897	-1.43	0.00434	-3.17
Lama3	59.9621	2670.79	11.6894	6.24e-39	-5.24	4.93e-20	-7.17
Lao1	0	17.1645	0.88222	5.54e-06	-4.62	0.00138	-3.5
Laptm5	23.1378	93.8774	6.16328	1.71e-08	-1.92	1.31e-14	-3.81
Lcn4	0	4.37975	0	0.0182	-2.82	0.0334	-3.33
Ldlrad2	43.5997	211.532	30.598	5.47e-14	-2.2	6.73e-15	-2.72
Lep	0.310378	12.4378	0	0.00219	-3.25	0.00111	-4.59
Lgi1	2.11011	9.98874	0	0.0676	-1.8	0.00159	-4.45
Lhx2	9.17563	258.831	3.71074	7.13e-36	-4.52	6.71e-07	-5.16
Lhx6	9.54542	817.729	1.37144	1.33e-116	-6.21	8.46e-50	-8.5
Lims2	68.6484	4339.02	70.4756	8.2e-47	-5.72	8.98e-110	-5.84
Lin7a	10.0233	116.981	4.61377	9.09e-14	-3.32	1.6e-19	-4.56
Lingo2	0.627104	6.86149	0	0.0503	-2.28	0.0087	-3.9
Lipe	164.602	1730.14	111.074	8.58e-146	-3.34	1.19e-89	-3.9
Lmo1	30.4539	312.264	43.0768	8.22e-30	-3.24	2.02e-19	-2.81
Lmo7	441.928	1277.27	210.832	3.16e-17	-1.48	7.99e-35	-2.55
Lonrf3	43.8697	318.474	52.3946	3.9e-21	-2.75	4.18e-16	-2.54
Lor	6.09507	24.7467	3.08843	0.00518	-1.8	0.00704	-2.65
Lpar4	82.9794	1533.56	184.819	3.66e-160	-4.16	3.49e-84	-3.02
Lpar6	871.629	7376.58	868.466	3.66e-176	-3.03	5.21e-92	-3.05
Lpcat4	225.954	1268.31	249.743	9.89e-52	-2.43	4.55e-38	-2.31
Lphn2	1590.76	7112.53	1036.62	6.74e-103	-2.11	1.95e-170	-2.75
Lrrc23	1.67555	9.86872	0.69357	0.0317	-2.07	0.01	-3.11
Lrrc55	23.9524	237.791	6.57198	2.63e-40	-3.24	1.55e-34	-5.13
Lrrc8c	305.814	2889.14	223.488	4.55e-195	-3.19	2.68e-143	-3.66
Lrtm2	0.641079	16.7122	0	7.24e-05	-3.68	7.03e-05	-5.21
Lta	1.99597	10.8381	0.822865	0.0907	-1.8	0.0411	-2.74
Ly6a	1442.73	81823.2	371.499	4.25e-77	-5.66	1.82e-191	-7.69
Ly6c2	6.50244	45.0846	3.08164	1.99e-05	-2.51	1.62e-06	-3.6
Ly9	0.434561	5.55325	2.61359	0.039	-2.34	0.589	-0.815
Lypd2	2.00677	230.976	3.36651	2.83e-39	-6.19	3.96e-31	-5.78
Lysmd2	301.215	2272.55	1251.25	5.16e-103	-2.86	2.48e-13	-0.831
Magix	14.8143	790.455	10.744	2.07e-99	-5.65	6.16e-89	-6.15
Mamdc2	7.31835	46.0736	5.351	6.8e-07	-2.49	3.97e-07	-2.96
Maml3	34.4876	402.239	140.024	5.11e-40	-3.42	6.88e-14	-1.49
Marcksl1-ps4	0.32054	14.8222	0.941576	3.76e-05	-3.98	0.00202	-3.32
Marveld3	8.62372	64.689	1.24215	9.13e-05	-2.53	4.67e-10	-5.09
Masp1	0	7.09209	0	0.00166	-3.52	0.00585	-4.03
Mcam	1299.29	21793	1996.29	5.61e-103	-3.99	2.67e-71	-3.4
Mfge8	3317.66	25955.4	2468.89	2.69e-156	-2.92	1.54e-144	-3.36
Mfhas1	319.975	1820.81	563.209	7.27e-123	-2.46	1.48e-37	-1.66
Mgll	1359.56	7670.18	5743.94	3.05e-38	-2.43	0.0488	-0.388
Mgp	956.476	6618.7	3400.61	1.33e-05	-2.55	0.161	-0.897
Mgst2	31.2621	304.037	30.1788	4.94e-27	-3.17	1.2e-30	-3.26
Micall2	31.0058	201.048	46.0758	9.49e-19	-2.64	2.81e-13	-2.09
Mir1190	0.62393	6.67429	0	0.0384	-2.29	0.00843	-3.91
Mir216b	1.19982	8.39271	0	0.0684	-2.04	0.00446	-4.15
Mir217	1.06548	4.49505	0	0.273	-1.36	0.0393	-3.26
Mir450b	1.6964	9.28551	1.00093	0.0529	-1.88	0.0469	-2.54
Mir691	0.313552	5.96724	0	0.0331	-2.51	0.0172	-3.64
Mkl2	2215.3	12149.6	2540.93	1.6e-135	-2.41	9.18e-83	-2.23
Mmp15	59.7878	2260.29	140.792	2.68e-190	-5.13	2.54e-48	-3.95
Mob3b	42.8468	312.385	23.9371	2.62e-24	-2.75	4.93e-35	-3.65
Mosc1	9.60835	63.4067	7.4228	2.81e-07	-2.54	1.04e-06	-2.92
Moxd1	0.934308	11.3495	1.57579	0.00613	-2.62	0.0215	-2.43
Mpp4	9.25098	55.8144	25.0427	6.09e-06	-2.34	0.0331	-1.09
Ms4a1	16.8741	124.288	5.76649	4.33e-13	-2.78	9.82e-12	-4.24
Ms4a4b	6.60562	87.6675	1.11285	9.77e-11	-3.4	3.3e-12	-5.76
Ms4a6c	15.8863	56.9335	5.27048	0.00053	-1.68	1.32e-05	-3.24
Ms4a6d	12.1681	186.602	2.27615	1.75e-32	-3.86	1.44e-25	-6.02
Msx1as	0.951457	6.09725	0	0.1	-1.87	0.0115	-3.79
Mtap1a	7.41205	101.377	27.2794	5.63e-20	-3.56	3.17e-05	-1.83
Mtap2	14.4507	535.533	3.33856	5.14e-14	-4.66	5.32e-49	-7.2
Mtmr11	317.2	2230.25	536.117	8.35e-77	-2.75	1.8e-59	-2.02
Muc13	1.09649	33.2396	3.81887	6e-08	-3.97	2.94e-05	-2.89
Mycn	1857.7	4647.11	640.126	5.05e-13	-1.27	4.89e-52	-2.82
Myl9	143.908	714.622	33.7878	1.47e-22	-2.23	5.24e-64	-4.34
Myo10	5404.74	25194.4	1400.32	4.99e-121	-2.18	2.01e-161	-4.13
Myo1g	17.3525	65.3832	10.2789	7.22e-05	-1.8	2.22e-06	-2.57
Myo7b	2.51922	9.44619	0.333644	0.132	-1.54	0.00703	-3.54
Myt1l	0.941296	20.5309	0	8.36e-05	-3.4	2.44e-05	-5.44
Napsa	5.88867	42.9496	0.88222	4.24e-07	-2.65	2.14e-08	-4.86
Nav2	116.577	812.75	109.246	3.9e-27	-2.72	3.63e-29	-2.85
Nckap1l	20.0873	57.329	4.0495	0.00186	-1.4	5.72e-10	-3.65
Ncoa7	521.381	7219.68	719.546	1.11e-230	-3.74	5.89e-142	-3.29
Ndst4	0	4.96296	0	0.0101	-3.02	0.0216	-3.53
Ndufa4l2	3.30347	39.0222	3.98124	3.5e-07	-3.1	3.44e-05	-3
Nebl	0.630918	35.2638	0	5.04e-09	-4.61	3.23e-07	-6.19
Necab2	1.52723	310.236	0	7.69e-46	-6.98	2.08e-19	-9.06
Nedd9	556.343	3215.92	1681.49	3.77e-07	-2.37	1.37e-08	-0.904
Nepn	2.43435	133.18	0.941576	1.02e-18	-5.1	2.46e-15	-6.37
Nes	50.2302	2533.18	35.3687	4.43e-299	-5.58	1.35e-226	-6.13
Neurl1b	48.9184	392.857	78.523	2.94e-43	-2.93	9.47e-23	-2.27
Neurl2	40.0129	174.04	16.5791	7.01e-10	-2.03	8.57e-16	-3.29
Ngp	17.9238	24.3064	3.3733	0.757	-0.324	0.0157	-2.45
Nipal2	79.644	234.098	34.723	0.187	-1.27	9.27e-07	-2.63
Nipsnap3a	0.465567	12.7058	1.8238	0.00157	-3.16	0.0331	-2.34
Nkd2	9.93825	51.6803	4.22757	5.59e-07	-2.23	1.57e-08	-3.47
Nkx2-3	7.82203	140.995	0.822865	2.46e-15	-3.92	3.47e-18	-6.55
Nlrp1c-ps	0.310378	85.1429	0	9.75e-18	-6.19	2.73e-11	-7.38
Nlrp6	0	4.78665	1.17221	0.018	-2.83	0.306	-1.56
Notch3	86.4482	508.235	17.7496	1.87e-31	-2.5	4.08e-46	-4.77
Notch4	92.3439	4188.28	197.856	7.64e-189	-5.39	4.26e-158	-4.36
Noxo1	119.321	1264.04	82.1345	2.07e-93	-3.35	1.14e-66	-3.88
Npr3	26.688	729.074	74.4192	8.98e-53	-4.58	6.29e-28	-3.21
Nptx1	6.9148	72.0496	9.13512	1.03e-10	-3.17	6.85e-07	-2.87
Npy1r	33.5733	76.3128	13.0082	0.021	-1.08	3.97e-06	-2.43
Nr1i2	1.71724	4.25591	0	0.579	-0.774	0.0371	-3.28
Nr4a1	335.332	1970.71	1150.66	3.16e-05	-2.34	0.000114	-0.744
Nr5a1	0.155189	8.51182	0	0.00234	-3.27	0.00311	-4.25
Nrarp	580.794	3506.67	1653.78	5.48e-141	-2.54	5.2e-09	-1.05
Nrip2	78.9571	125.597	17.9535	0.0112	-0.63	4.43e-15	-2.72
Nsun7	63.0967	235.23	17.508	1.04e-12	-1.84	5.24e-25	-3.64
Nt5e	23.9619	139.643	17.0976	2.26e-14	-2.46	2.2e-16	-2.95
Ntrk2	89.1298	250.809	38.5072	0.0528	-1.32	1.27e-10	-2.64
Nudt12	13.2312	25.079	2.67294	0.153	-0.847	0.000613	-2.86
Oasl1	482.627	826.342	103.572	0.000324	-0.729	2.75e-64	-2.95
Ocln	10.0052	21.7981	2.26936	0.339	-0.896	0.00208	-2.88
Odf4	0.32054	5.60808	2.80224	0.0302	-2.53	0.636	-0.731
Ogfrl1	1152.95	5689.37	394.887	8.07e-54	-2.25	7.48e-126	-3.8
Olfm2	0.475729	6.92341	1.49015	0.0242	-2.52	0.203	-1.71
Olfr1396	5.91666	140.448	10.7541	9.01e-22	-4.37	3.8e-12	-3.52
Olfr458	0.32054	7.34068	1.85008	0.0113	-2.85	0.211	-1.6
Olfr520	1.55137	24.8351	4.00752	2.36e-06	-3.47	0.00165	-2.38
Olfr78	4.05777	41.044	2.75858	3.37e-05	-2.84	1.98e-06	-3.54
Olfr832	0.155189	5.91386	0	0.0131	-2.82	0.0118	-3.78
Orm1	0.279371	8.05481	0.838563	0.00718	-2.98	0.0661	-2.55
Osgin1	8.5946	69.127	47.4183	5.42e-10	-2.77	0.359	-0.486
Ovol1	38.4049	66.271	9.03167	0.0583	-0.715	6.31e-08	-2.74
P2ry10	6.84382	45.9115	4.80075	5.38e-07	-2.5	0.000132	-3.07
P2ry2	12.5506	212.962	9.09993	2.98e-29	-3.85	1.63e-31	-4.45
P2ry6	7.6776	79.4399	2.68864	5.72e-12	-3.21	8.75e-13	-4.61
Pacsin1	2.07212	23.0595	1.51644	8.07e-05	-3.05	0.000178	-3.42
Palmd	99.5292	3520.77	102.162	4.2e-33	-4.9	1.64e-167	-5.04
Papln	10.7682	152.79	21.1856	1.35e-25	-3.63	6.04e-15	-2.75
Pappa2	1.49623	6.39358	0	0.145	-1.58	0.00964	-3.86
Paqr5	3.94017	133.002	12.6394	1.12e-22	-4.81	6.81e-17	-3.27
Parvg	20.8843	146.104	95.1663	1.07e-20	-2.69	0.0645	-0.594
Pax5	0	3.37401	0	0.0484	-2.43	0.0711	-2.94
Pcdh1	13.3253	647.395	33.6746	1.68e-99	-5.37	6.78e-81	-4.19
Pcdh17	1236.64	10375.1	605.898	1.14e-91	-3.01	5.77e-113	-4.05
Pcdh18	71.1864	180.991	25.3344	8.81e-06	-1.27	7.63e-15	-2.8
Pcdh19	39.8671	1130.99	11.1387	3.71e-94	-4.69	6.17e-116	-6.55
Pcolce	453.52	2376.15	316.256	6.25e-97	-2.34	5.65e-09	-2.8
Pcsk1	0.838114	9.59746	0	0.0326	-2.39	0.00239	-4.34
Pde1a	24.4894	96.7964	7.93831	0.00281	-1.8	3.34e-10	-3.42
Pde4a	90.4049	297.205	20.2352	1.63e-19	-1.67	5.23e-33	-3.85
Pde5a	62.3106	226.003	34.8413	2.63e-16	-1.8	6.21e-22	-2.65
Pde9a	21.0217	410.528	31.3115	9.34e-52	-4.19	2.09e-30	-3.61
Pdgfb	1460.36	4083.76	421.347	3.19e-27	-1.44	9.52e-116	-3.24
Pdgfd	50.4392	519.27	128.727	2.72e-41	-3.31	6.1e-20	-1.97
Pdgfrb	90.2664	344.997	34.6531	2.14e-13	-1.86	4.33e-32	-3.28
Pdia2	1.39988	8.35785	0	0.213	-1.57	0.0111	-3.85
Pdlim2	30.5002	200.452	35.8392	8.99e-17	-2.63	3.56e-14	-2.43
Peg10	1.69258	12.1883	8.84681	0.00585	-2.35	0.702	-0.386
Penk	63.4218	1151.76	39.7646	6.12e-51	-4.06	4.48e-18	-4.67
Pgbd1	16.1917	122.332	71.9609	9.31e-19	-2.8	0.00974	-0.735
Pglyrp1	841.779	7469.67	834.037	1.25e-46	-3.07	5.74e-108	-3.12
Phlda2	0	5.79856	0.419282	0.00543	-3.2	0.0542	-2.77
Phospho1	16.4312	50.3322	5.744	0.00135	-1.5	1.04e-06	-2.98
Phyhipl	0.32054	80.1728	3.09223	1.93e-16	-6.38	4.73e-12	-4.37
Pik3c2b	184.631	7370.63	47.6261	1.09e-55	-5.14	5.82e-276	-7.22
Pitpnm3	8.10248	244.874	10.1114	2.07e-45	-4.62	1.38e-39	-4.48
Piwil4	1.83761	29.4455	0	1.14e-06	-3.37	9.07e-07	-6
Pkd1l2	5.14059	15.8563	1.02721	0.146	-1.36	0.000938	-3.41
Plac1	0.879282	4.59998	0	0.215	-1.56	0.0337	-3.34
Plb1	0.155189	20.7337	1.60886	5.87e-07	-4.57	0.000754	-3.22
Plcb1	190.146	2766.53	127.684	1.09e-116	-3.79	5.83e-131	-4.39
Plekha6	23.6727	135.25	25.3052	5.25e-09	-2.37	7.4e-08	-2.36
Plekha7	5.08791	181.063	1.4465	2.62e-36	-4.96	3.98e-23	-6.6
Plekhg6	4.91685	25.2061	2.30243	0.007	-1.99	0.000364	-3.11
Plk3	14.8249	148.347	50.4411	3.53e-16	-3.15	0.000115	-1.49
Plscr2	42.7143	3747.44	24.4004	4.45e-269	-6.33	2.13e-189	-7.13
Pltp	40.5017	1718.58	35.5035	9.27e-133	-5.31	2.22e-153	-5.53
Plvap	16999.1	39160.4	3821.59	2.34e-28	-1.16	2.02e-121	-3.32
Plxnb2	2072.65	2557.76	456.262	0.0428	-0.261	8.88e-46	-2.45
Pmp2	0.155189	8.89568	2.88408	0.0164	-2.83	0.451	-1.19
Pnma2	1.54438	6.38032	0.274288	0.127	-1.6	0.0328	-3.03
Pole	523.099	599.499	107.024	0.546	-0.157	4.75e-28	-2.45
Pomc	14.5671	29.1105	4.99108	0.119	-0.889	0.000588	-2.38
Pou2af1	74.9187	877.934	128.078	7.3e-102	-3.49	1.86e-15	-2.7
Pou2f2	8.17731	34.7283	3.59715	0.000738	-1.91	0.000233	-2.99
Ppap2b	962.077	19323.7	4681.1	4.98e-272	-4.27	4.33e-124	-2.02
Ppp1r3c	27.8927	233.249	22.7225	0.000138	-2.68	9.32e-21	-3.32
Prdm1	15.34	1476.81	9.39159	2.08e-196	-6.43	3.32e-131	-7.15
Prg3	3.434	12.1647	0.822865	0.0694	-1.54	0.0111	-3.03
Prom1	149.562	451.681	38.6995	6.8e-15	-1.53	2.62e-30	-3.46
Prps1l1	3.35797	13.3666	0.333644	0.0249	-1.72	0.000779	-4.07
Prrx1	153.472	303.852	52.3943	0.00151	-0.927	3.79e-09	-2.47
Prss16	5.07903	19.661	0.838563	0.0957	-1.55	0.000793	-3.84
Prtn3	3.27801	34.7415	0	0.00874	-2.58	7.11e-06	-5.79
Psmb11	0.599911	6.37323	2.748	0.0377	-2.34	0.412	-1.04
Ptchd1	18.4647	1783.29	3.99014	1.49e-181	-6.47	4.53e-91	-8.57
Ptgdr	1.86227	7.34975	0	0.488	-0.991	0.029	-3.44
Ptgds	15.7504	1810.32	32.3942	6.11e-185	-6.77	5.41e-135	-5.7
Ptgs1	1281.82	2739.76	304.243	2.2e-13	-1.05	3.49e-48	-3.12
Ptk6	2.8169	23.5325	2.0875	0.00265	-2.47	0.00127	-3.1
Ptk7	69.7659	114.891	18.3779	0.0143	-0.681	1.88e-12	-2.59
Ptprc	39.7793	289.456	14.816	1.54e-27	-2.79	2.87e-32	-4.24
Ptprg	1156.03	6796.58	1417.58	1.13e-40	-2.49	9.28e-43	-2.23
Ptprj	112.204	411.727	34.726	4.19e-27	-1.82	2.48e-42	-3.54
Ptpru	12.4872	129.203	14.0295	8.35e-11	-3.11	3.2e-13	-3.09
Pydc3	3.80587	98.5989	0.274288	1.77e-22	-4.51	1.05e-13	-6.91
Rab15	93.4913	129.004	17.6844	0.782	-0.341	0.000136	-2.68
Rab19	14.7357	153.141	2.51737	2.35e-22	-3.25	8.98e-24	-5.59
Rab32	365.136	990.311	129.615	6.34e-09	-1.38	3.15e-48	-2.89
Rab37	0.744939	12.8741	1.08657	0.00185	-2.96	0.0079	-3.02
Rab3b	5.00685	36.0684	12.7878	0.00016	-2.47	0.0251	-1.43
Rad51l1	27.3077	65.4476	10.9186	0.00331	-1.21	9.97e-07	-2.44
Rad54b	64.1686	203.501	23.528	2.75e-09	-1.61	3.68e-17	-3.07
Rapgef3	297.913	1845.98	173.164	8.21e-132	-2.58	4.35e-142	-3.38
Rapgef4	17.8096	1600.02	33.2676	7.83e-173	-6.35	9.7e-135	-5.54
Rarres1	18.2006	135.833	27.6283	3.4e-17	-2.78	3.31e-11	-2.23
Rasal3	6.39724	31.5354	3.08164	0.0224	-1.89	2.95e-05	-3.13
Rasgef1a	18.4661	1866.57	4.02322	1.84e-174	-6.53	1.16e-91	-8.63
Rassf4	20.2616	160.158	76.5945	6.8e-13	-2.8	0.00952	-1.02
Rbm24	9.14909	71.7315	16.4286	1.15e-08	-2.79	5.71e-05	-2.05
Rbm44	2.58954	20.9667	2.60979	0.00129	-2.48	0.0105	-2.61
Rbpms2	54.3884	127.453	23.7188	0.000221	-1.15	3.68e-07	-2.37
Rcan2	9.39813	84.7044	28.0286	3.08e-14	-3.06	9.2e-05	-1.56
Rd3	22.239	178.651	4.02322	1.79e-20	-2.93	8.07e-26	-5.28
Rdh10	2684.07	9756.69	707.081	1.64e-54	-1.82	1.13e-193	-3.75
Rdh9	35.4412	538.582	15.1288	4.01e-74	-3.85	9.21e-72	-5.06
Reg3d	1.21685	6.74619	0	0.194	-1.6	0.0271	-3.47
Rergl	1.23083	6.50797	0	0.105	-1.76	0.00961	-3.86
Ret	28.2772	596.826	29.4258	5.69e-95	-4.34	4.07e-77	-4.27
Retn	8.4382	102.965	1.64573	9e-07	-3.17	0.000372	-4.5
Rgs12	539.757	1569.97	248.745	1.43e-58	-1.5	2.58e-72	-2.63
Rin1	61.0606	307.754	53.4264	1.33e-22	-2.24	1.53e-17	-2.46
Ripply3	453.951	2389.26	240.014	7.54e-88	-2.35	4.11e-147	-3.28
Rmst	1.54438	38.4334	0.419282	2.82e-09	-4.08	1.1e-07	-5.52
Rnase6	3.64818	13.7773	1.36086	0.0543	-1.63	0.00396	-2.92
Rnf144b	1809.42	11035.5	1534.43	2.58e-172	-2.56	1.87e-190	-2.82
Rnf165	8.28816	32.9495	1.38714	0.00067	-1.81	9.44e-07	-4.16
Rnf17	5.16771	11.3684	1.6945	0.35	-0.911	0.0329	-2.35
Rnf183	1.26501	28.779	0.667287	3.66e-06	-3.74	1.99e-05	-4.52
Rnf43	5.44062	12.2054	0.548577	0.41	-0.871	0.00818	-3.34
Rp1	0	3.60842	0	0.0444	-2.47	0.0656	-2.98
Rprm	2.76255	24.1882	0	0.00226	-2.54	6.85e-06	-5.68
Rragb	9.95861	32.5199	3.70016	0.00207	-1.62	5.35e-05	-2.87
Rsad2	2280.59	25168.3	867.369	1.15e-70	-3.39	5.51e-242	-4.81
Rtp3	146.18	797.005	408.732	7.13e-71	-2.39	1.71e-10	-0.934
Rtp4	2143.84	3168.05	478.107	3.32e-05	-0.52	2.5e-82	-2.69
Runx1t1	253.723	1110.26	156.207	5.21e-27	-2.07	4.44e-33	-2.78
Runx3	5.68782	22.7396	0.838563	0.00858	-1.8	0.00011	-4.15
S100a9	52.5269	84.7822	2.09641	0.762	-0.446	0.00351	-3.93
S1pr4	127.026	799.771	125.053	1.68e-66	-2.6	6.16e-56	-2.64
Sacs	1.54121	21.5735	2.70602	8.25e-05	-3.13	0.00457	-2.62
Samd12	4.21565	90.4708	1.15651	2.01e-14	-4.16	4.93e-15	-5.65
Sash3	7.18616	29.2753	1.11285	0.0137	-1.79	9.64e-06	-4.21
Scarb1	920.016	16660.6	191.314	4.43e-299	-4.13	4e-298	-6.4
Scg3	33.5022	308.553	39.8235	5.37e-42	-3.11	1.52e-29	-2.9
Scgb3a1	15.7226	765.449	39.0082	1.17e-81	-5.43	2.12e-57	-4.22
Scnn1b	1.21685	18.4851	0	0.000818	-3.06	0.00011	-5.16
Sctr	2.45784	9.63339	0.838563	0.0843	-1.63	0.0294	-2.84
Sdk2	0	22.2201	0	8.22e-08	-5.14	8.45e-06	-5.62
Sec31b	118.644	408.945	74.1237	1.23e-11	-1.73	4.34e-17	-2.4
Sele	32.4042	122.891	19.0295	1.16e-07	-1.8	7.05e-14	-2.63
Sell	9.42188	94.2666	3.79091	1.22e-11	-3.07	1.88e-13	-4.5
Selp	162.309	1211.22	46.0782	3.95e-65	-2.83	2.33e-85	-4.62
Selplg	8.88437	51.3069	7.05953	1.02e-06	-2.38	0.000287	-2.72
Sema3g	0.310378	56.0804	0.333644	5.95e-14	-5.63	4.9e-10	-6.11
Serpina1d	2.13413	86.1288	6.77633	3.97e-20	-4.88	2.43e-08	-3.53
Serpinb10-ps	12.0212	67.0649	4.49295	2.81e-09	-2.38	1.01e-07	-3.62
Serpinb1a	199.734	8010.49	104.041	4.58e-293	-5.25	4e-298	-6.23
Serpinb1c	1.49623	50.9046	4.58238	9.67e-11	-4.44	4.87e-06	-3.2
Serpinb9	5565.95	20976.1	2603.79	5.28e-64	-1.87	1.86e-136	-2.98
Sez6	0.32054	67.4118	0	9.62e-16	-6.21	2.68e-10	-7.1
Sez6l2	107.11	419.503	27.4537	3.61e-15	-1.89	3.49e-49	-3.9
Sfn	13.8632	162.115	33.0196	2.53e-27	-3.37	7.64e-13	-2.26
Sgpp2	14.6742	102.046	20.9953	8.26e-13	-2.67	3.63e-08	-2.21
Sh2d1a	1.54438	6.3756	0	0.131	-1.59	0.0101	-3.84
Sh3bp4	74.1858	448.437	140.722	2.55e-38	-2.53	6.28e-17	-1.63
Shox2	2.60669	6.39358	0.274288	0.4	-0.949	0.0323	-3.03
Shroom3	52.0606	524.449	17.6729	1.75e-50	-3.26	5.25e-06	-4.32
Shroom4	28.2984	222.577	22.1988	4.22e-22	-2.89	4.81e-13	-3.18
Siglecg	5.65919	41.6777	1.00093	4.5e-05	-2.61	4.79e-08	-4.78
Skap1	10.1563	76.0119	4.52646	2.88e-10	-2.74	1.04e-06	-3.84
Sla	22.9171	119.184	6.43378	6.78e-10	-2.27	1.71e-10	-4.02
Slamf1	3.67851	20.9257	2.25878	0.000912	-2.23	0.00163	-2.93
Slamf6	8.00751	81.6308	4.14193	4.22e-12	-3.19	1.42e-11	-4.11
Slamf8	13.5223	390.037	2.49108	1.12e-45	-4.59	5.03e-40	-6.91
Slc10a5	19.5947	30.6268	4.04059	0.583	-0.513	0.0162	-2.51
Slc12a2	2273.03	9413.02	1271.15	2.79e-05	-1.92	6.3e-35	-2.84
Slc12a5	58.4072	86.5153	16.0403	0.256	-0.515	2.18e-06	-2.33
Slc12a7	770.173	3110.58	501.17	6.68e-74	-1.96	1.48e-85	-2.6
Slc12a8	55.7628	199.605	16.7762	0.000886	-1.69	1.36e-13	-3.42
Slc1a1	19.2895	614.884	5.55703	9.42e-63	-4.84	8.96e-54	-6.52
Slc26a10	23.0704	2285.5	8.64079	6.18e-236	-6.49	1.66e-32	-7.59
Slc26a2	102.44	211.899	29.0854	2.71e-05	-1	7.77e-20	-2.8
Slc27a3	205.108	502.426	92.2508	6.59e-21	-1.25	8.12e-28	-2.4
Slc2a4	6.56185	48.7175	5.77028	7.48e-05	-2.62	1.14e-06	-2.93
Slc35f1	5.63279	57.069	4.37803	2.6e-10	-3.2	2.54e-07	-3.39
Slc37a2	58.8154	114.018	13.2177	0.186	-0.839	5.77e-07	-2.97
Slc38a3	9.08764	40.2429	5.93098	1.85e-05	-2.02	6.85e-05	-2.66
Slc38a8	0.465567	6.63744	0.333644	0.0706	-2.17	0.0491	-2.89
Slc5a5	13.4774	38.3402	5.82964	0.0149	-1.35	7.52e-05	-2.58
Slc6a6	869.479	10263	314.851	1.07e-132	-3.5	5.12e-29	-4.88
Slc9a3r2	2950.32	15317.1	14574.6	2.83e-40	-2.32	0.849	-0.0435
Slco1a4	0.903302	64.7665	1.75386	3.13e-15	-5.27	6.16e-11	-4.85
Slco1c1	1.9346	14.145	0	0.00737	-2.3	0.0002	-4.98
Slfn1	3.58787	25.1196	2.2257	0.000189	-2.55	0.000232	-3.23
Slfn4	15.633	93.9184	29.1748	2.99e-06	-2.36	0.00101	-1.61
Slit3	36.6651	120.863	19.0507	2.38e-06	-1.62	1.38e-09	-2.56
Slitrk2	0	60.5073	0	3.6e-14	-6.5	1.05e-09	-6.95
Slitrk4	0.630918	17.3824	5.43832	2.52e-05	-3.65	0.0954	-1.48
Slitrk6	4.00391	18.0101	0	0.193	-1.5	0.000108	-5.16
Smad6	14.781	312.741	8.15324	3.51e-54	-4.32	9.86e-44	-5.08
Smad7	230.72	3077.63	227.916	8.92e-81	-3.67	9.96e-102	-3.72
Smad9	27.3218	110.994	17.1379	2.39e-08	-1.96	4.39e-11	-2.65
Snai2	61.6858	1215.51	43.7878	2.7e-134	-4.23	2.96e-136	-4.76
Snph	8.15434	22.5214	2.79165	0.225	-1.16	0.0141	-2.57
Snx20	13.3712	252.853	8.51317	5.22e-36	-4.1	3.7e-33	-4.72
Sorbs2	574.584	6934.9	1644.68	2.85e-159	-3.54	5.83e-42	-2.04
Sorl1	19.5431	72.2517	5.9136	0.00302	-1.68	1.02e-05	-3.4
Sowaha	6.24021	29.6144	3.09734	0.00281	-1.99	0.00178	-2.96
Sox11	29.4084	1005.74	146.029	1.73e-85	-5.01	5.11e-19	-2.73
Sox17	38.6539	3820.07	18.1685	1.26e-260	-6.47	6.85e-252	-7.61
Sp100	338.954	2251.55	131.526	3.46e-38	-2.67	5.12e-63	-4.03
Sparcl1	478.215	33071.5	255.271	2.17e-63	-5.9	4.31e-209	-6.95
Spata13	683.903	6619.06	1041.19	8.37e-182	-3.23	6.06e-84	-2.63
Spon2	14.4662	76.5697	5.04364	1.3e-08	-2.26	2.34e-10	-3.74
Srms	9.02165	129.283	2.62929	7.26e-26	-3.69	9.65e-21	-5.34
Sspo	69.9632	675.721	101.697	3.11e-38	-3.19	1.68e-19	-2.69
St6gal1	15.2854	359.535	9.28858	2.07e-61	-4.47	1.63e-49	-5.16
St8sia1	0.62393	8.98827	6.08443	0.00864	-2.69	0.694	-0.475
St8sia2	3.69872	52.0896	14.2661	8.89e-10	-3.49	0.0051	-1.76
St8sia4	182.943	5225.98	767.955	4.43e-299	-4.77	6.16e-127	-2.73
Stac2	5.02971	13.9583	1.00093	0.0741	-1.32	0.00548	-3.15
Stap1	9.70851	43.6878	6.67667	3.62e-05	-2.04	0.000304	-2.51
Stk10	112.97	2149.37	164.167	1.48e-245	-4.19	6.12e-89	-3.68
Stk32a	31.9745	178.296	132.997	3.33e-14	-2.37	0.239	-0.392
Stom	173.486	3595.66	817.727	4.32e-168	-4.31	1.89e-54	-2.1
Styk1	1.11749	52.5664	4.9737	1.23e-11	-4.84	1.5e-07	-3.27
Sulf1	1669.43	4863.53	727.996	2.75e-17	-1.49	3.36e-42	-2.7
Susd5	0.58975	13.4081	0.274288	0.000479	-3.27	0.000865	-4.09
Sybu	14.6049	518.753	49.7464	7.68e-71	-4.91	4.86e-40	-3.36
Syk	23.4209	471.902	4.6905	4.41e-62	-4.19	6.73e-52	-6.48
Synpo2	34.4041	95.9427	7.34096	0.000173	-1.37	2.62e-11	-3.5
Syt12	13.0179	23.1615	3.73155	0.347	-0.747	0.00278	-2.48
Syt15	116.361	5086.17	42.3514	1.13e-229	-5.37	3.76e-241	-6.83
Syt7	65.1553	886.191	155.251	7.82e-68	-3.65	8.37e-35	-2.46
Tacr1	6.38143	16.924	0.941576	0.0769	-1.23	0.000727	-3.51
Tbc1d10c	40.4274	91.858	9.133	0.00356	-1.09	3.64e-13	-3.24
Tbc1d2	16.4986	97.0888	31.3561	7.45e-10	-2.48	1.11e-05	-1.59
Tbx2	15.0604	89.4344	27.307	5.74e-07	-2.36	8.33e-05	-1.67
Tbx3	20.0192	1211.27	7.14005	5.55e-16	-5.27	3.77e-33	-7.08
Tbx5	2.27916	18.037	11.3205	0.00101	-2.47	0.456	-0.599
Tceal5	0	6.80194	2.89299	0.00273	-3.4	0.396	-1.06
Tcf15	53.6046	1183.69	32.4481	1.24e-127	-4.39	7.97e-112	-5.11
Tdrd12	2.79923	19.9412	6.09881	0.00058	-2.45	0.073	-1.52
Tesc	19.725	48.8042	5.19542	0.108	-1.13	5.61e-05	-3.01
Tex11	0.279371	4.83912	0.274288	0.0498	-2.35	0.0814	-2.63
Themis	2.0271	4.83912	0	0.465	-0.914	0.0267	-3.44
Thrsp	71.0639	2505.18	102.29	1.03e-124	-5.01	7.19e-149	-4.56
Tktl1	4.67483	35.4439	7.46646	3.09e-05	-2.57	0.00185	-2.08
Tlr12	1.65141	10.3735	0	0.0518	-2	0.00222	-4.38
Tlr6	8.80339	99.7369	2.03873	4.03e-12	-3.29	1.63e-16	-5.15
Tlr7	3.92544	16.9844	1.50585	0.0485	-1.77	0.00293	-3.09
Tlx1	0.775946	40.6684	0	1.19e-08	-4.39	9.52e-08	-6.37
Tmc1	1.09585	5.97105	0	0.133	-1.74	0.0112	-3.8
Tmc5	9.31082	20.8903	0.822865	0.48	-0.838	0.000381	-3.78
Tmcc3	900.416	5277.06	906.709	1.81e-84	-2.5	5.16e-65	-2.51
Tmem125	10.8781	25.1255	2.91927	0.347	-0.942	0.0128	-2.69
Tmem154	14.3224	881.771	18.8133	2.69e-124	-5.73	5.78e-102	-5.44
Tmem180	136.941	302.613	45.8613	3.27e-11	-1.09	2.26e-32	-2.68
Tmem182	3.36179	133.777	0.274288	5.44e-22	-4.87	5.44e-15	-7.26
Tmem184a	7.12368	19.7725	1.02721	0.192	-1.17	0.00023	-3.7
Tmem30b	14.7791	33.2457	3.23722	0.387	-0.908	0.00774	-2.87
Tmem35	4.98589	83.2785	17.7212	6.4e-15	-3.69	5.17e-08	-2.17
Tmem37	29.1212	34.5455	6.08443	0.733	-0.186	0.00108	-2.34
Tmem47	118.564	3341.51	290.385	4.43e-299	-4.75	2.95e-122	-3.49
Tmem56	46.164	69.9446	8.21939	0.735	-0.433	0.000607	-2.81
Tmie	74.6078	226.003	36.3993	5.81e-12	-1.55	2.34e-16	-2.57
Tmigd1	6.85447	255.004	2.00186	7.25e-10	-4.46	8.05e-08	-5.78
Tnfrsf13c	9.028	77.9015	1.60886	4.19e-11	-2.96	1.27e-12	-5.14
Tnfrsf1b	692.281	1971.62	276.444	3.98e-40	-1.47	9.75e-109	-2.8
Tnfrsf9	48.4742	1323.83	13.6649	2.17e-103	-4.67	7.85e-130	-6.51
Tnfsf18	2.75489	30.6756	0.419282	1.58e-05	-2.98	1.69e-06	-5.18
Tnip3	1.41638	13.3737	0.667287	0.00368	-2.65	0.00307	-3.48
Tox3	8.67075	150.227	5.9136	8.41e-31	-3.93	1.23e-15	-4.57
Traf3ip3	1.02748	21.4611	5.14665	4.17e-06	-3.66	0.0135	-1.89
Treml2	3.09246	56.4456	3.02908	6.42e-10	-3.68	7.37e-08	-3.92
Trib2	944.689	10637	3368.71	9.89e-157	-3.44	9.03e-36	-1.63
Trpc6	2.81626	21.0471	10.5481	0.00211	-2.42	0.242	-0.898
Trpm3	6.916	63.1044	9.21864	3.3e-10	-2.91	4.42e-08	-2.69
Trpm5	0.468741	10.9779	0.548577	0.00127	-3.22	0.00869	-3.26
Tshr	3.4238	471.117	1.70509	6.91e-64	-6.57	6.52e-41	-7.53
Tspan13	4690.1	40493.1	23764.9	9.18e-104	-3.05	1.94e-12	-0.739
Ttc30a2	1.74391	8.10164	0.274288	0.106	-1.73	0.0144	-3.34
Ttc39c	11.1255	66.9191	11.2803	8.69e-08	-2.43	0.000165	-2.46
Ttr	55.3111	120.077	15.1356	0.45	-0.856	0.000265	-2.76
Tubb4a	1.59571	13.8714	1.21586	0.047	-2.22	0.0258	-2.77
Txlnb	11.0463	140.312	41.9571	1.12e-22	-3.51	1.78e-07	-1.68
Tyrobp	71.8134	114.197	14.1186	0.221	-0.599	1.15e-05	-2.86
Uaca	681.622	4098.1	787.243	2.2e-183	-2.54	2.03e-103	-2.35
Uchl1	83.5802	392.454	26.8474	4.36e-26	-2.15	7.17e-47	-3.81
Ugt1a7c	0	4.84621	1.38714	0.0133	-2.93	0.337	-1.41
Upp1	469.379	2537.26	157.296	9.03e-81	-2.39	7.01e-175	-3.97
Usp43	10.6052	166.909	17.3825	1.22e-23	-3.71	2.99e-19	-3.16
Vash1	1020.36	5339.58	365.168	5.47e-74	-2.34	9.91e-132	-3.84
Vcan	98.5286	363.002	68.2582	3.34e-19	-1.81	1.97e-19	-2.37
Vegfc	150.584	1074.26	84.4548	1.6e-48	-2.77	4e-43	-3.6
Vsig2	58.734	1824.02	105.114	3.2e-228	-4.87	8.34e-55	-4.07
Vsig8	0	9.35596	0.419282	0.000417	-3.84	0.00892	-3.44
Vwa1	297.969	6922.02	297.095	1.1e-179	-4.46	2.62e-171	-4.5
Vwa3a	12.839	614.202	7.74966	1.87e-110	-5.43	2.4e-75	-6.16
Vwf	125.218	6454.57	163.89	5.74e-172	-5.57	8.25e-166	-5.23
Wbscr17	4.91319	40.6371	6.50583	3.25e-07	-2.83	0.000197	-2.53
Wdfy4	15.4449	45.8628	5.89446	0.000506	-1.45	0.000122	-2.7
Wdr16	3.91226	93.4927	5.13775	2.12e-14	-4.32	3.12e-13	-3.93
Wdr64	0	4.6619	0	0.0171	-2.84	0.0311	-3.37
Wfdc1	12.3112	86.3251	56.2533	2.57e-11	-2.64	0.259	-0.578
Whrn	11.3217	115.162	5.62529	1.04e-18	-3.16	1.25e-19	-4.21
Wnt8b	2.15128	22.3463	6.3761	6.87e-05	-2.97	0.103	-1.59
Wwc1	20.0997	38.15	6.02887	0.447	-0.732	0.00512	-2.4
Xirp1	0.782293	9.58474	3.54458	0.0169	-2.55	0.301	-1.21
Ybx2	3.84137	28.1737	3.05536	0.000177	-2.53	0.000206	-2.95
Zc3h12d	1.45887	12.6076	0	0.0123	-2.36	0.000424	-4.8
Zdbf2	4.90938	86.4464	23.5097	4.29e-15	-3.93	0.00347	-1.77
Zfp366	1.18966	225.398	0	2.85e-34	-6.82	5.45e-17	-8.63
Zfp36l3	1.80978	20.8004	1.4308	5.56e-05	-3.05	0.000429	-3.3
Zfp456	246.714	277.323	49.4406	0.619	-0.133	1.1e-20	-2.43
Zfp599	90.2666	135.021	24.3109	0.0622	-0.529	2.45e-10	-2.38
Zfp600	0.475729	6.31985	0	0.0297	-2.44	0.0109	-3.82
Zfp711	20.8419	179.613	11.5647	6.37e-19	-3	5.88e-25	-3.85

## Sheet: 5X-DEG D-LEC only
5X-DEGs in D-LEC only subset with average FPKM, p-adjusted, and log2 fold-change values in LN-LEC v D-LEC, LN-LEC v LN-BEC, and D-LEC v LN-BEC.
				LN-LEC v D-LEC		D-LEC v LN-BEC
5X-DEG	Average FPKM LN-LEC	Average FPKM LN-BEC	Average FPKM D-LEC	P-adjusted	Log2 FC	P-adjusted	Log2 FC
Aatk	304.684	74.5597	517.621	1.05e-05	-0.741	8.35e-48	2.81
Abat	94.8138	106.601	520.87	4.45e-22	-2.4	2.62e-32	2.31
Abca5	101.241	228.425	924.776	3.63e-47	-3.15	2e-31	2.04
Abcb11	0	0.649852	4.01263	0.0407	-2.64	0.289	1.75
Abi3bp	613.891	292.754	12489.2	1.24e-302	-4.32	1.11e-209	5.42
Ace2	6.29524	2.53985	15.6477	0.128	-1.13	0.015	2.37
Ackr3	2046.45	1591.08	11907.7	1.63e-35	-2.5	2.78e-56	2.92
Acot12	1.86111	0.355885	16.6558	0.000884	-2.83	0.000125	4.47
Acta1	1.39988	4.60707	526.317	5.56e-60	-7.68	6.2e-63	6.7
Actn2	0	1.17823	11.0094	5.88e-05	-4.44	0.015	2.72
Actn3	3.86343	0.888988	8.57931	0.318	-1.02	0.0472	2.59
Adam19	248.869	592.045	1856.73	2.39e-90	-2.87	2.71e-18	1.67
Adamts1	977.073	3689.53	5625.5	2.74e-11	-2.44	0.00551	0.634
Adamts15	20.8476	55.7902	117.042	1.99e-11	-2.37	0.000755	1.09
Adamts5	1707.81	666.886	4063.56	9.04e-10	-1.22	2.37e-20	2.61
Adamtsl1	140.616	61.1087	4374.11	1.27e-246	-4.9	2.1e-38	6.03
Adamtsl4	107.992	106.966	1452.79	4.08e-96	-3.71	1.97e-76	3.78
Add2	0.940656	0.355885	27.3663	3.32e-07	-4.27	1.27e-06	5.2
Add3	4274.24	1860.06	13441.1	8.63e-95	-1.63	8.89e-150	2.88
Adra2b	1.59254	9.11065	24.5921	1.49e-05	-3.46	0.0504	1.38
Adrb2	414.117	677.439	2710.91	1.07e-144	-2.68	8.43e-51	2.02
Ahsg	62.7462	58.2473	394.293	1.35e-15	-2.57	4.05e-17	2.76
Alb	0	0.71177	42.6072	3.52e-10	-6.12	2e-07	5.16
Aldh1a1	21.545	55.2613	206.568	1.24e-11	-3.08	0.000891	1.87
Aldh1a2	5.15385	10.7913	218.733	1.3e-10	-4.78	0.00378	3.53
Alox15	0.775946	6.09634	10.5922	0.0256	-2.52	0.644	0.683
Alpk3	1.58305	8.93762	20.3683	0.000454	-3.05	0.333	1.07
Amelx	1.10982	2.19105	19.1906	2.22e-05	-3.57	0.0015	2.87
Angptl1	38.9708	32.9551	183.967	1.23e-14	-2.2	1.24e-13	2.47
Ank	2337.54	770.914	7884.08	1.55e-60	-1.73	3.32e-179	3.38
Ank1	2.81256	3.01957	38.5067	5.31e-09	-3.59	1.39e-06	3.51
Ank2	988.504	250.41	5920.23	1.24e-120	-2.56	3.76e-138	4.57
Ank3	593.35	244.235	2036.24	3.22e-27	-1.75	5.58e-30	3.06
Ankrd1	7.92842	20.0243	111.21	2.28e-17	-3.71	6.66e-09	2.45
Ano4	1.18966	1.30443	16.5074	0.000938	-3.09	0.00559	3.13
Ano5	0	0	11.0391	0.000225	-4.22	0.00126	4.55
Anxa1	722.746	3347.32	4502.27	5.49e-32	-2.59	0.00157	0.455
Anxa8	3.126	4.68316	157.202	3.57e-06	-4.46	9.75e-06	4.43
Aph1b	331.956	185.604	3692.76	1.57e-199	-3.45	2.6e-93	4.32
Aph1c	48.8577	25.2506	332.525	7.45e-20	-2.72	1.25e-39	3.72
Apoc3	0	0.71177	5.68085	0.0153	-3.06	0.226	1.98
Apod	58.8186	90.1056	738.427	1.02e-10	-3.44	3.45e-05	2.89
Apold1	12816.2	13914.7	183550	1.86e-18	-3.69	1.83e-58	3.72
Arhgap10	54.624	178.481	378.409	3.6e-47	-2.76	4.15e-10	1.11
Arhgap32	403.643	113.278	668.757	0.000444	-0.711	1.48e-27	2.58
Arhgap6	84.1329	96.8278	1625.91	1.62e-208	-4.26	6.33e-75	4.08
Armc4	0.465567	0	4.78673	0.0956	-2.04	0.0202	3.57
Arsj	44.7006	20.7329	526.493	6.38e-67	-3.5	3.43e-45	4.65
Art1	0.58975	1.59367	11.153	0.00383	-3.04	0.059	2.34
Artn	0.155189	1.5984	4.76935	0.0339	-2.63	0.371	1.28
Atf3	119.107	251.281	1886.17	6.2e-17	-3.8	4.1e-09	2.86
Atp6v0a4	1.58174	3.43593	35.0308	4.92e-08	-4.11	3.83e-05	3.15
Bcr	3274.54	1688.15	11330.9	3.87e-84	-1.77	1.56e-167	2.77
Bdnf	2.95072	8.00052	23.7399	0.000397	-2.75	0.0946	1.5
Bex1	0.32054	0	7.22225	0.013	-2.94	0.0087	3.93
Bicd1	177.216	70.3162	357.385	2.88e-06	-0.997	6.4e-15	2.36
Bmx	1781.26	427.99	2614.99	7.09e-05	-0.534	3.03e-44	2.63
Btg2	1408.02	5763.42	13114.1	3.65e-17	-3.12	4.69e-08	1.21
Btn1a1	0	0.355885	5.83511	0.00759	-3.3	0.0693	2.75
Cacna1e	6.50561	9.74016	252.827	8.67e-50	-5.12	2.95e-36	4.62
Cacna1s	0	0.592659	5.78766	0.00355	-3.51	0.0886	2.43
Cacna2d1	792.465	175.916	2111.03	1.73e-15	-1.39	1.68e-42	3.59
Camk2n1	3366.99	1117.66	10814	1.31e-78	-1.66	2.3e-110	3.29
Capn8	0.941296	0	9.05416	0.027	-2.37	0.00233	4.36
Ccdc103	1.5102	0	9.75663	0.0202	-2.22	0.00118	4.54
Cd300a	15.2854	9.29641	61.3813	7.69e-07	-1.96	6.61e-07	2.68
Cd40	162.646	75.7332	456.392	2.13e-15	-1.45	2.15e-29	2.6
Cd9	6436.95	7395.67	40690.4	6.89e-90	-2.63	4.48e-87	2.48
Cda	709.27	216.069	1196.95	3.79e-06	-0.734	3.03e-55	2.49
Cdh11	360.354	109.514	671.066	1.06e-06	-0.874	5.37e-13	2.61
Cdh15	0.468741	0.592659	9.91944	0.00468	-3.09	0.0245	3.03
Cdhr1	12.3105	7.74667	78.1647	1.4e-10	-2.55	8.64e-12	3.27
Cebpb	768.666	216.512	3954.72	5.78e-41	-2.33	4.01e-13	4.06
Cgref1	21.4532	36.8323	168.535	1.45e-12	-2.81	8.36e-05	2.16
Chn1	190.305	67.2639	542.949	1.28e-22	-1.48	6.71e-45	3.02
Chodl	0	0	50.3153	8.38e-11	-6.29	2.66e-08	6.63
Chrdl2	0	0	18.4848	6.94e-06	-4.87	9.34e-05	5.22
Chrna1	1.25421	1.83517	10.4646	0.0306	-2.38	0.0559	2.17
Chrnb1	3106.23	1046.29	6586.05	2.85e-16	-1.06	1.44e-52	2.67
Cilp2	0.634092	0.652215	10.3039	0.00264	-3.15	0.00926	3.22
Clca5	29.4385	142.151	1152.87	7.67e-157	-5.19	2.61e-73	3.03
Clgn	0.32054	0.355885	45.7951	4.18e-12	-5.86	2.05e-09	5.96
Clic3	1.52406	3.89766	23.0778	0.000124	-3.19	0.00979	2.33
Clic5	1916.38	8050.72	10200.8	3.62e-119	-2.39	0.00224	0.37
Clip3	91.7155	48.9656	652.899	9.63e-55	-2.8	8.2e-40	3.74
Cmklr1	15.9011	56.6745	338.74	3.78e-08	-3.96	7.3e-10	2.56
Cnih3	0	0	4.46367	0.0174	-3	0.0362	3.31
Col18a1	1189.41	1541.78	7647.19	6.47e-68	-2.65	1.7e-99	2.34
Col5a3	47.1856	117.962	335.993	2.37e-16	-2.76	2.91e-06	1.52
Col8a2	29.4126	8.17392	62.2275	0.00591	-1.03	9.77e-07	2.84
Comp	32.3795	23.3686	1449.55	3.19e-39	-5.31	6.89e-115	5.93
Cox4i2	7.32325	29.8529	75.1193	1.84e-10	-3.08	0.000314	1.34
Cox6a2	0.313552	3.79563	70.1179	6.95e-15	-6.4	3.56e-08	4.02
Creb5	37.5463	66.9879	841.215	5.22e-121	-4.42	3.33e-95	3.66
Crmp1	29.0906	11.1378	94.4986	5.88e-06	-1.65	4.79e-08	3.02
Cst9	0	0.293967	6.85006	0.00304	-3.57	0.0329	3.08
Cybrd1	28.2752	39.9481	189.312	5.48e-14	-2.68	2.15e-07	2.23
Dagla	124.087	37.9244	356.413	2.34e-12	-1.48	1.15e-16	3.21
Dapk1	1575.29	577.337	3010.67	3.85e-13	-0.914	2.59e-54	2.4
Dapk2	2223.99	681.2	4879.22	7.56e-22	-1.11	3.26e-84	2.86
Dbn1	769.066	189.609	1157.59	0.000218	-0.566	2.78e-49	2.63
Ddit4	278.916	1148.56	1840.62	9.78e-29	-2.67	0.0145	0.703
Ddr1	87.1381	73.2041	446.546	4.46e-45	-2.32	1.32e-10	2.59
Diap2	787.197	3592.2	4796.28	7.64e-146	-2.58	8.34e-05	0.445
Dlg1	2504.74	1949.53	21466.9	1.76e-287	-3.08	1.1e-290	3.49
Dmtn	2.40651	3.60987	153.269	9.08e-26	-5.59	1.23e-19	5.24
Drp2	14.596	10.4104	71.9648	2.23e-07	-2.18	2.59e-08	2.74
Duoxa1	17.8624	4.97713	239.449	3.31e-34	-3.66	1.15e-32	5.46
Dusp5	1.77242	1.89	26.5782	7.82e-06	-3.38	6.23e-05	3.49
Dync2li1	200.024	48.7457	546.233	4.89e-20	-1.42	4.86e-40	3.48
Ece1	6405.07	15494.8	43254.7	5.32e-147	-2.73	9.46e-64	1.51
Edn3	0.313552	0.592659	28.7992	1.57e-08	-5.15	2.09e-06	4.76
Efcab10	0	1.82572	19.587	3.43e-07	-5.24	0.00146	3.05
Efhb	12.4188	7.86342	43.608	0.000958	-1.73	2.38e-05	2.4
Efna5	33.7136	81.4746	828.643	1.21e-83	-4.54	2.54e-53	3.36
Egr1	10303.9	41311.4	91321.7	3.98e-08	-2.96	9.14e-11	1.17
Egr2	76.6337	249.432	618.281	1.87e-05	-2.76	8.69e-06	1.33
Emid1	2347.42	598.105	4500.41	1.48e-08	-0.916	6.49e-56	2.93
Enho	340.564	77.4364	610.493	8.81e-06	-0.823	3.86e-30	2.98
Enkur	32.1194	48.362	1157.64	4.81e-114	-5.14	2.02e-119	4.58
Ephb1	328.636	523.775	2008.81	5.87e-65	-2.59	1.08e-40	1.96
Etv4	1.84777	10.6339	53.6195	2.87e-13	-4.41	2.57e-05	2.26
F2rl1	161.424	160.235	7650.64	1.24e-302	-5.52	2.19e-249	5.59
Fabp3	10.7775	12.5504	71.8743	7.63e-09	-2.56	3.94e-07	2.49
Faim2	0	2.43164	5.50658	0.0056	-3.38	0.528	0.973
Fam110c	1.41004	3.97284	27.2442	8.45e-07	-3.62	0.00244	2.6
Fam115e	0	2.05777	3.45894	0.0311	-2.76	0.768	0.541
Fam154a	0.279371	0	8.50937	0.00181	-3.42	0.00197	4.39
Fam180a	69.4625	16.8918	234.877	3.93e-06	-1.68	0.000108	3.46
Fat3	4.89283	7.2873	229.276	3.33e-40	-5.22	4.73e-30	4.9
Fbln5	1430.7	3913.42	10217.8	2.01e-65	-2.8	1.54e-26	1.41
Fbln7	15.6007	17.1263	1434.21	3.5e-171	-6.5	6.3e-16	5.97
Fbxl2	58.6227	151.568	931.602	1.44e-125	-3.95	2.39e-54	2.64
Fcer1g	123.298	298.638	935.42	3.54e-79	-2.9	6.96e-21	1.67
Fcgbp	1.56523	5.68563	12.2532	0.0103	-2.36	0.324	1.05
Fcna	3.91222	0.592659	16.8284	0.00852	-1.92	0.000267	3.99
Fev	3.1368	0	16.0454	0.0216	-1.99	9.79e-05	5.17
Fgf13	8.51107	6.09108	43.3735	3.49e-06	-2.24	8.61e-06	2.72
Fgf16	22.2971	39.2249	138.205	7.18e-14	-2.52	9.85e-08	1.82
Fgf18	4.48165	7.87668	41.6116	3.62e-07	-2.94	0.000604	2.32
Fgfr1	1046.48	461.682	3330.75	3.92e-39	-1.65	1.27e-64	2.87
Fgfr4	2.22663	3.01957	22.1939	0.00208	-2.8	0.0139	2.56
Fgl2	2395.39	698.741	122104	1.24e-302	-5.64	1.97e-203	7.42
Fhl1	560.239	1873.2	13950.1	2.64e-212	-4.6	3.32e-38	2.91
Fhl2	12.094	24.6396	184.016	4.14e-27	-3.81	3.31e-08	2.85
Figf	65.1464	117.805	559.936	5.02e-39	-3.06	6.44e-16	2.26
Fmnl2	4804.91	1293.85	7233.48	1.55e-06	-0.57	5.71e-89	2.51
Fndc1	107.705	86.1714	8580.46	1.24e-302	-6.26	1.23e-30	6.41
Fras1	33.9746	9.8678	66.4351	0.124	-0.902	1.2e-05	2.67
Frem2	17.8412	4.49032	74.8844	3.15e-05	-1.98	3.76e-11	3.88
Frmd4b	225.183	785.37	1705.29	1.93e-95	-2.9	9.06e-21	1.14
Frzb	29.29	44.7119	165.364	3.31e-23	-2.46	0.000259	1.86
Fxyd1	256.561	161.197	1908.3	6.85e-14	-2.8	1.39e-61	3.58
Fxyd7	0.779119	1.5984	27.9671	5e-08	-4.24	3.1e-06	3.82
Fyn	863.943	3792.5	6808.73	6.27e-188	-2.96	2.21e-13	0.871
Gabrb1	1.09267	3.08241	20.9495	8.43e-06	-3.58	0.00813	2.51
Gap43	21.8346	10.0035	5192.43	1.24e-302	-7.83	3.97e-213	8.99
Gas2l3	245.921	177.041	1460.35	1.75e-53	-2.55	8.04e-67	3.06
Gata5	0.630918	1.48165	17.7898	5.63e-05	-3.75	0.00856	3.01
Gatm	163.874	49.0573	679.826	1.08e-34	-2.01	6.61e-65	3.8
Gc	0	0.355885	9.74984	0.000174	-4.24	0.00414	3.68
Gdf15	67.9076	19.2933	195.809	5.28e-09	-1.48	3.79e-11	3.29
Gjb5	1.21368	1.0081	19.8112	0.00018	-3.26	0.000535	3.72
Gmfg	671.398	209.791	1374.15	9.02e-09	-1.01	2.27e-59	2.73
Gnat1	4.24598	8.35114	25.273	0.00211	-2.32	0.0782	1.5
Gng11	4990.46	11634.4	33343	2.84e-139	-2.72	8.35e-38	1.54
Gng13	0.279371	1.60076	7.11377	0.00763	-3.07	0.183	1.77
Gng2	3240.35	1498.92	12169.3	7.13e-45	-1.89	4.32e-153	3.04
Gp9	0	0.884263	4.76723	0.0238	-2.88	0.292	1.7
Gpnmb	74.7421	15.5809	120.232	0.0931	-0.649	1.59e-07	2.89
Gpr124	646.481	160.805	1113.14	9.43e-09	-0.768	3.46e-73	2.81
Gpsm2	101.994	22.3596	333.036	3.02e-09	-1.64	1.53e-45	3.89
Gucy1a3	2229.61	1513.73	10547.7	3.6e-11	-2.18	2.06e-34	2.81
Gucy1b3	104.711	75.6132	2443.86	2.44e-153	-4.48	1.15e-158	5.02
H2afy2	80.6489	351.402	491.024	2.34e-53	-2.58	0.000819	0.51
Heyl	15.493	73.8895	198.771	1.16e-25	-3.55	2.93e-06	1.44
Hgf	49.42	25.5672	218.964	7.48e-13	-2.1	5.53e-15	3.08
Hif3a	1.11681	6.74093	23.6246	3.9e-06	-3.83	0.021	1.72
Hmcn1	1799.7	450.465	3568.54	7.75e-13	-0.968	1.96e-109	3.01
Hrasls	0	0	3.06594	0.0437	-2.6	0.0756	2.9
Hsd11b1	58.0098	26.3849	345.822	1.84e-25	-2.5	1.79e-45	3.72
Hspa1a	68.7424	208.921	421.858	2.05e-16	-2.54	0.000186	1.04
Htr1d	0	0	12.7895	1.8e-05	-4.65	0.000202	4.98
Htr2b	92.4994	126.184	7620.96	9.01e-248	-6.33	1.84e-272	5.92
Igf2	159.641	611.931	9691.38	1.24e-302	-5.88	4.01e-151	4
Igfbp5	2664.89	1462.95	164964	1.24e-302	-5.91	5.65e-190	6.8
Igfbp6	103.604	176.462	1411.11	1.38e-15	-3.6	8.14e-05	2.85
Il17ra	520.928	192.933	1446.3	1.25e-21	-1.45	2.46e-61	2.92
Il6ra	94.3788	141.925	789.605	6.06e-69	-3.04	4.64e-33	2.49
Inadl	78.2736	39.4916	221.162	7.3e-08	-1.44	3.45e-10	2.48
Iqgap2	462.987	286.728	1780.41	9.34e-49	-1.91	0.000104	2.53
Irx6	0	1.77798	3.68957	0.0223	-2.9	0.661	0.764
Islr2	40.065	21.679	252.082	6.71e-28	-2.61	4.92e-28	3.53
Itgb2	19.5271	35.3664	116.623	3.77e-13	-2.49	1.07e-05	1.71
Itgb8	3.21029	5.74373	31.5434	2.04e-05	-2.84	0.000397	2.38
Itsn1	862.129	477.942	2893.52	2.89e-55	-1.72	3.25e-82	2.62
Jph1	133.773	102.009	835.836	2.62e-42	-2.61	3.65e-52	3.04
Kcnab2	17.6753	60.4185	154.565	8.26e-18	-3.02	6.35e-05	1.36
Kcnd3	3.92227	7.0349	51.0324	4.25e-09	-3.45	1.44e-06	2.77
Kcng2	21.5863	75.3773	118.606	5.35e-13	-2.35	0.0324	0.679
Kcnj11	3.28829	3.60842	20.286	0.000841	-2.43	0.00889	2.29
Kcnj5	0	0.293967	60.7057	6.23e-13	-6.67	2.97e-10	6.28
Kcnj8	510.252	153.735	837.784	1.3e-05	-0.698	2.14e-37	2.47
Kcnk5	270.466	90.0158	1134.04	2.55e-39	-2.03	4.56e-114	3.68
Kcnmb2	0	0	29.8404	5.94e-09	-5.76	6.41e-07	6.09
Kcnn3	27.653	56.715	2870.96	1.2e-232	-6.66	2.17e-147	5.65
Kcnt2	27.104	14.8709	128.276	6.44e-08	-2.14	1.54e-08	3.04
Kcp	6.40425	8.04681	52.2187	1.63e-08	-2.91	1.79e-06	2.64
Kera	2.99495	0.888988	9.54038	0.139	-1.44	0.0337	2.72
Kif5a	10.4014	4.66899	86.4398	1.24e-10	-2.89	2.16e-16	4.1
Klf1	4.75785	1.76616	12.5814	0.14	-1.19	0.0328	2.41
Klhl31	0.279371	0	12.2426	0.000134	-3.94	0.000301	4.89
Klk14	0	1.5984	4.33949	0.0147	-3.06	0.416	1.17
Kng2	3.34094	3.19915	71.8514	1.21e-14	-4.19	4.94e-12	4.32
Krt14	2.84107	3.9062	28.6021	4.07e-05	-2.96	0.0013	2.69
Krt19	19.9423	46.2747	201.066	7.51e-06	-3.01	0.000276	2.08
Krt7	8.19196	39.1499	86.9395	8.85e-12	-3.23	0.0593	1.14
L1cam	95.4479	158.895	820.018	3.28e-50	-3.04	3.39e-37	2.39
Lax1	27.6257	79.463	602.733	2.76e-76	-4.35	2.53e-32	2.92
Ldb3	4.69949	29.1662	44.9162	2.82e-05	-2.84	0.198	0.649
Lect2	11.5633	20.3504	64.042	2.89e-09	-2.4	0.00377	1.62
Lefty1	220.577	54.4763	518.398	3.73e-10	-1.2	3.69e-47	3.27
Lgals3	37.5175	104.099	1493.92	1.17e-158	-5.26	9.26e-101	3.86
Liph	7.60908	6.91724	284.955	1.35e-53	-5.04	4.18e-43	5.3
Lmna	1854.31	3466.06	11515.2	9.74e-74	-2.61	2.13e-26	1.75
Lpcat2	8.59854	48.6446	113.177	1.64e-21	-3.54	0.00295	1.23
Lrrc30	0	0	5.28274	0.0075	-3.29	0.0187	3.61
Ltbp3	1215.93	252.992	2153.89	3.69e-08	-0.801	3.53e-56	3.1
Ltbp4	5795.82	7451.41	42599.9	1.11e-81	-2.85	3.16e-64	2.54
Ly6g5c	7.10091	0.8819	29.7472	0.00169	-1.9	1.53e-06	4.44
Mapk10	5.20137	3.54795	75.0073	2.04e-13	-3.72	3.97e-14	4.28
Mb	0.961619	0.946181	216.167	1.38e-28	-7.25	5.67e-23	7.24
Mctp2	83.0611	25.909	143.242	0.00583	-0.772	1.24e-11	2.47
Megf10	1.73692	1.36398	81.9185	5.61e-14	-5.11	2.76e-11	5.45
Megf6	254.397	99.4199	6431.76	2.81e-265	-4.62	2.4e-202	6.02
Metrnl	199.922	69.6937	358.937	9.18e-06	-0.819	5.65e-23	2.38
Mfsd4	1780.47	487.133	3704.13	1.67e-23	-1.04	6.77e-41	2.94
Mmp14	3676.16	968.048	6060.97	0.000104	-0.699	8.15e-41	2.66
Mpp7	1532.54	908.025	12120.9	2.43e-111	-2.95	1.28e-189	3.76
Msln	4.83649	5.39257	275.03	4.33e-15	-5.28	9.68e-10	5.18
Mterfd2	9624.99	3057.49	21381.7	9.55e-15	-1.13	4.79e-82	2.83
Mtus1	1774.26	5597.2	10027.8	4.26e-142	-2.48	6.37e-16	0.868
Mup3	0	1.42354	11.1595	0.000105	-4.35	0.0567	2.45
Musk	0.713932	0.355885	14.2712	0.000356	-3.4	0.000536	4.2
Mybpc1	3.67538	4.83912	27.6011	0.0014	-2.57	0.00819	2.32
Myf5	0	0	43.4563	2.71e-10	-6.14	6.45e-08	6.48
Myh1	1.38602	1.0081	74.1047	1.25e-17	-5.2	1.79e-13	5.76
Myh2	0.313552	0.355885	46.0346	9.24e-12	-5.83	3.77e-09	5.94
Myh4	0.961619	0	7.98708	0.0332	-2.37	0.00255	4.31
Myh7	0.310378	0	6.02508	0.0278	-2.6	0.0108	3.83
Myl2	0	0	28.3778	8.51e-09	-5.72	8.41e-07	6.04
Myl3	0	0	5.9831	0.0108	-3.19	0.0274	3.46
Myl7	0.465567	2.90046	19.6345	9.19e-06	-3.99	0.00242	2.58
Mylk2	0.872295	1.17587	42.5193	2.2e-11	-5	2.32e-08	4.65
Mylpf	31.9417	82.3915	262.197	1.18e-20	-3	2.62e-08	1.69
Myo5b	15.7287	14.6252	1099.41	3.44e-147	-5.96	1.76e-25	6.01
Myoc	11.6893	19.5906	75.7189	2.43e-06	-2.56	0.00204	1.91
Myod1	0	0	15.4328	7.21e-06	-4.82	0.000101	5.16
Myom3	0	1.89	5.04364	0.00997	-3.2	0.413	1.17
Myot	0	0	33.8052	6.38e-10	-5.98	1.4e-07	6.3
Myoz1	0.465567	0.652215	27.2701	8.51e-08	-4.47	1.61e-06	4.7
Myoz2	11.3838	1.77943	31.2797	0.00826	-1.37	4e-05	3.8
Napepld	294.138	105.738	855.183	1.53e-22	-1.51	4.21e-43	3.03
Nbl1	57.9758	102.814	872.274	1.11e-73	-3.84	2.92e-52	3.1
Ncam1	98.2037	75.257	987.339	3.18e-82	-3.29	3.2e-06	3.49
Ncf2	1061.24	286.639	2757.56	6.42e-26	-1.36	5.58e-156	3.29
Ncs1	16.6554	9.54172	67.197	2.49e-06	-1.89	4.21e-06	2.75
Ninj2	2.42101	0	6.93358	0.362	-1.07	0.00519	4.09
Nipal4	5.91983	7.15073	52.6943	1.58e-07	-3.01	3.47e-05	2.78
Nkain4	3.34464	5.27582	127.857	1.96e-18	-4.8	0.000605	3.87
Nkd1	70.6574	36.8879	520.799	4.14e-48	-2.84	1.04e-35	3.81
Nlgn1	2.79477	1.30443	28.023	0.000153	-3.01	4.29e-06	4.04
Nmb	238.322	139.35	2072.03	3.48e-71	-3.09	3.46e-89	3.91
Nme5	33.5987	13.2324	125.572	1.21e-07	-1.83	1.41e-12	3.2
Nox4	273.197	112.344	1055.11	3.67e-55	-1.93	1.25e-106	3.25
Noxa1	0.838114	0	8.19178	0.0923	-2.12	0.0124	3.82
Nphp4	18.7892	17.5979	128.266	8.26e-15	-2.72	6.33e-11	2.83
Nrxn3	19.2033	9.77849	126.308	4.65e-14	-2.68	2.13e-12	3.63
Nsg1	1506.71	716.305	6906.16	6.7e-46	-2.17	9.19e-67	3.28
Ntn1	987.989	264.642	20214	5.84e-207	-4.32	4.96e-158	6.24
Optc	3.85402	6.10053	41.1237	1.37e-08	-3.27	0.00032	2.61
Osr1	60.8049	43.4625	422.818	4.19e-23	-2.75	1.18e-21	3.27
Oxtr	3.91354	5.21299	33.6484	3.87e-06	-2.82	0.000381	2.57
P2rx6	0.627104	1.77943	8.23888	0.0122	-2.78	0.207	1.79
Pacrg	5.80947	1.65559	12.4507	0.208	-0.975	0.0171	2.58
Pacsin3	51.07	22.6455	357.886	3.08e-37	-2.77	1.08e-38	3.98
Pak7	2.82007	0	4.80922	0.674	-0.532	0.0251	3.48
Palm	1161.18	666.704	6236.26	3.21e-59	-2.39	1.05e-102	3.24
Pappa	35.2615	17.8843	302.451	6.26e-17	-3.01	8.37e-29	4.05
Parvb	399.287	1555.14	2098.47	1.86e-31	-2.36	0.0781	0.457
Pax7	0	0	2.96293	0.0497	-2.54	0.0837	2.84
Pcsk6	379.073	128.764	15716.4	1.66e-64	-5.25	6.37e-243	6.93
Pcsk9	3.40295	0.948544	11.736	0.0825	-1.51	0.00565	3.09
Pde3b	166.287	142.915	1486.49	2.45e-124	-3.14	5.62e-95	3.4
Pdgfrl	16.3667	59.9733	122.357	1.41e-17	-2.87	0.000471	1.05
Pdlim3	316.141	127.37	1382.75	2.49e-26	-2.09	2.27e-42	3.44
Pgc	3.02727	0.886626	120.438	2.91e-25	-4.92	7e-18	6.45
Pgf	31.0394	61.8227	1107.97	2.26e-89	-5.09	1.29e-51	4.15
Pgm5	3929.51	984.016	8270.62	3.16e-22	-1.05	9.49e-69	3.09
Piwil1	0	0	3.80828	0.0229	-2.89	0.0447	3.2
Pkhd1l1	1279.13	341.799	10543	3.7e-53	-3	2.86e-19	4.8
Plau	113.864	148.989	1873.52	5.12e-112	-4	1.71e-61	3.66
Plaur	766.477	654.416	3314.5	6.44e-37	-2.08	2.34e-37	2.36
Plcd3	183.608	76.2757	453.528	2.38e-13	-1.28	2.72e-33	2.59
Pls1	8.93992	11.8392	114.264	3.09e-18	-3.46	1.93e-06	3.15
Plxdc1	70.6809	16.5218	941.114	2.13e-118	-3.7	6.97e-101	5.82
Pm20d1	3.32247	2.37208	29.7175	1.22e-05	-2.95	4.98e-05	3.42
Pmaip1	14.4636	29.3959	284.228	9.4e-37	-4.2	5.03e-25	3.27
Podn	7.98027	15.2254	60.2282	1.77e-05	-2.68	0.0192	1.88
Popdc3	0	0	5.84534	0.00445	-3.45	0.0123	3.78
Ppl	336.839	73.7942	1223.94	9.17e-13	-1.81	1.32e-12	3.93
Prkcc	20.708	64.058	145.746	1.51e-10	-2.64	0.00101	1.19
Prrg3	269.941	790.56	2255.58	8.99e-105	-3.04	2.3e-28	1.54
Prrt1	0.434561	0.296329	9.2623	0.00201	-3.2	0.00459	3.67
Prss57	1.23083	5.26073	10.4925	0.01	-2.51	0.494	0.895
Pstpip1	28.9513	14.3057	204.615	3.11e-20	-2.75	2.1e-27	3.8
Ptgis	18.8271	97.2014	222.715	4.03e-05	-3.15	0.254	1.12
Pvalb	2.02381	0.652215	32.2048	6.54e-06	-3.36	3.61e-07	4.92
Pygm	34.2345	164.746	924.15	4.63e-94	-4.7	2.27e-32	2.5
Radil	294.154	154.135	1477.8	1.61e-28	-2.29	1.47e-46	3.27
Rarb	231.042	148.324	1120.84	2.43e-42	-2.26	1.05e-44	2.93
Retnla	0.630918	1.42354	18.8883	6.48e-06	-3.92	0.00153	3.32
Rfx2	306.533	114.443	803.194	1.93e-06	-1.35	3.81e-17	2.8
Rgma	35.5043	13.2451	156.519	1.03e-08	-2.08	1.58e-14	3.49
Rgs17	22.3385	17.9987	110.983	4.85e-08	-2.19	3.89e-10	2.6
Rgs7bp	214.224	71.829	2499.48	1.25e-187	-3.52	2.19e-173	5.14
Rhag	5.72649	0.590296	9.5298	0.432	-0.657	0.00803	3.21
Rhob	1563.09	5774.57	12114.4	1.81e-90	-2.92	8.8e-09	1.09
Rhobtb3	772.02	272.917	2032.28	1.68e-24	-1.38	1.03e-81	2.91
Rhoh	29.1688	52.0291	251.925	4.61e-32	-3.01	1.34e-23	2.29
Rimbp2	0	0	73.6057	9.74e-15	-6.99	6.16e-11	7.3
Rnf112	0.558743	0	15.0241	0.000149	-3.71	0.000111	5.13
Rnf207	1.21685	3.55504	132.037	4.88e-24	-6.15	1.93e-19	5.06
Rspo1	16.0735	19.6198	129.82	7.19e-09	-2.89	0.000135	2.61
Rspo3	191.3	57.1313	1150.17	3.91e-53	-2.56	2.88e-61	4.32
Ryr1	2.68589	5.49606	24.0472	5.14e-05	-2.85	0.00843	2.02
Ryr3	84.074	68.0214	569.287	1.02e-41	-2.71	2.52e-32	3.07
S100a6	1771.3	4109.92	29203.3	3.9e-206	-4.01	4.16e-66	2.85
S100a7a	4.36525	2.54694	40.4267	1.51e-07	-2.99	6.91e-08	3.79
Scel	2.51223	2.1816	17.4299	0.00697	-2.42	0.0113	2.65
Scn2a1	12.4378	26.9369	184.371	3.77e-32	-3.78	3.4e-14	2.77
Scn3b	255.862	68.2838	2105.32	4.33e-74	-3	1.44e-124	4.95
Sdc1	1424.55	319.374	8881.61	3.64e-56	-2.61	5.15e-184	4.81
Sema3f	854.101	1725.83	4548.46	4.67e-68	-2.38	1.15e-28	1.42
Sema4d	1687.58	532.833	6664.21	5.12e-81	-1.96	3.68e-104	3.66
Serpina3k	0.155189	0.293967	23.2326	1.61e-06	-4.75	4.1e-05	4.82
Serpina9	2.83341	0	6.42187	0.358	-0.968	0.00678	3.99
Serpine2	488.915	699.313	5872.33	4.6e-157	-3.55	2.74e-99	3.09
Serping1	1830.22	858.531	6152.29	6.94e-28	-1.72	9.9e-10	2.8
Sfrp2	244.689	280.404	1442.96	0.000124	-2.37	0.0171	2.18
Sgcd	45.5125	11.2875	203.352	6.85e-22	-2.12	2.85e-34	4.14
Sgce	90.2837	423.846	897.645	8.14e-53	-3.24	1.24e-13	1.11
Sgk3	8781.65	2668.47	13739.3	5.85e-12	-0.627	2.52e-116	2.39
Sh2d5	18.3949	27.1179	141.192	1.36e-20	-2.86	6.54e-13	2.37
Sh3pxd2b	204.31	138.197	1638.74	6.25e-52	-2.97	4.82e-62	3.57
Shc1	8685.42	4135.52	25897.7	4.39e-26	-1.55	7.26e-55	2.67
Shc2	95.0547	38.5476	410.928	1.6e-37	-2.07	1.96e-47	3.41
Shc3	0	2.66696	58.062	3.26e-13	-6.69	3.56e-07	4.08
Sim2	0.155189	1.77561	7.09974	0.00468	-3.24	0.226	1.63
Slc10a4	6.92366	10.1102	238.748	9.79e-42	-4.84	1.24e-33	4.49
Slc10a6	1071.48	444.875	2718.21	3.14e-24	-1.32	8.39e-48	2.63
Slc13a5	4.01359	1.48165	21.1208	0.00236	-2.12	0.000835	3.35
Slc16a14	1.67607	4.97713	26.1661	4.26e-05	-3.22	0.00594	2.25
Slc22a2	0.32054	0.886626	7.87348	0.00429	-3.21	0.0504	2.5
Slc22a23	120.431	174.35	730.136	9.1e-52	-2.58	1.38e-34	2.09
Slc22a3	58.1285	79.5118	349.017	1.37e-17	-2.5	7.08e-11	2.14
Slc24a1	94.6834	20.1042	134.946	0.0681	-0.499	7.37e-14	2.74
Slc24a4	0	0.948544	7.1748	0.00106	-3.83	0.0606	2.39
Slc39a8	110.109	569.258	596.55	1.75e-25	-2.4	0.792	0.0984
Slc40a1	64.8909	22.8785	936.106	3.31e-79	-3.79	2.42e-102	5.34
Slc45a4	125.344	161.594	2086.57	9.62e-164	-4	3.62e-89	3.71
Slc6a3	7.66728	1.77943	21.159	0.0358	-1.31	0.00223	3.18
Slc6a4	0.475729	5.20118	10.5082	0.00127	-3.32	0.418	0.941
Sln	0	0.592659	75.376	1.89e-14	-6.97	6.74e-12	6.1
Slpi	35.1569	58.521	762.617	4.35e-16	-4.18	2.56e-07	3.53
Slurp1	0	2.18397	10.1152	0.000241	-4.19	0.095	1.93
Smoc2	31.8322	49.9035	193.003	3.11e-08	-2.48	0.0858	1.77
Smpx	0	0	13.5742	1.66e-05	-4.68	0.000188	5.01
Smtnl1	2.35069	0.296329	10.3294	0.0845	-1.73	0.00494	3.71
Smyd1	2.62054	1.65795	36.5676	3.93e-07	-3.28	8.61e-08	4.19
Snca	16.1252	44.4059	285.864	7.43e-48	-3.98	1.12e-13	2.69
Sned1	532.951	137.522	825.414	0.00188	-0.612	1.61e-31	2.59
Spink2	0.313552	1.36162	12.9871	8.36e-05	-4.01	0.00918	2.85
Spock2	2.64023	14.1998	30.0427	3.63e-07	-3.27	0.229	1.03
Spp1	11.9599	15.3851	640.687	0.000127	-4.14	1.24e-36	5.29
Srpx2	13.3558	16.2231	78.6065	4.6e-11	-2.46	1.23e-06	2.26
Stard13	413.454	1204.76	2634.24	3.02e-75	-2.64	2.85e-14	1.15
Stc1	3706.69	18793.8	34314.5	1.65e-77	-3.17	2.68e-07	0.893
Stmn3	18.0599	7.10299	58.0165	0.00012	-1.65	2.58e-07	2.97
Stxbp6	1644.32	519.282	10922.3	2.59e-180	-2.71	3.18e-63	4.39
Syne1	1114.97	4926.87	13300.3	1.24e-302	-3.55	3.7e-42	1.46
Synpr	0	0.296329	92.9374	1.06e-16	-7.31	1.18e-13	6.94
Sytl4	37.178	177.137	274.528	1.64e-21	-2.77	0.00522	0.662
T2	0.940656	0.293967	6.80429	0.0701	-2.12	0.0213	3.2
Tagln3	33.9449	22.1313	451.26	3.09e-53	-3.71	1.98e-56	4.36
Tbc1d9	181.886	300.509	1274.15	3.75e-95	-2.77	3.99e-28	2.11
Tbx20	0.32054	0	4.13514	0.0639	-2.32	0.0347	3.32
Tbx4	0.58975	0	6.20526	0.0434	-2.3	0.00989	3.86
Tcap	3.00261	10.3399	82.6096	6.93e-15	-4.52	2.12e-07	2.91
Tfpi2	253.133	472.55	1618.25	5.64e-48	-2.64	1.35e-27	1.8
Thbs3	31.4469	21.005	242.07	1.66e-26	-2.86	5.43e-31	3.51
Thbs4	47.9767	14.1733	204.383	4.21e-09	-2.02	2.2e-15	3.75
Thrb	42.6203	62.6149	271.678	5.03e-23	-2.59	1e-06	2.11
Timp2	21848.1	8031.63	44891.7	9.92e-23	-1.02	1.77e-183	2.51
Tmc7	101.046	28.5325	523.947	2.77e-36	-2.32	9.3e-37	4.19
Tmem100	141.863	265.631	780.07	1.97e-27	-2.4	1.86e-10	1.57
Tmem108	3.1686	15.4948	52.0122	6.42e-12	-3.78	0.000334	1.74
Tmem231	473.097	200.186	1226.55	6.32e-26	-1.35	1.52e-53	2.64
Tnmd	0	0.296329	6.33288	0.00727	-3.32	0.0603	2.84
Tnnc2	0.155189	2.36355	127.136	4.78e-20	-7.22	2.06e-18	5.43
Tnni2	1.78258	1.60076	100.856	2.35e-18	-5.36	2.84e-14	5.59
Tnnt3	1.1795	2.36591	260.281	5.27e-39	-6.98	5.27e-34	6.48
Tns1	3341.34	7204.24	17515	2.64e-81	-2.36	1.58e-20	1.31
Tnxb	79.6976	60.005	3879.32	5.05e-273	-5.57	8.23e-22	5.77
Tpcn1	933.723	486.297	4139.61	2.7e-66	-2.12	4.77e-69	3.11
Tpmt	165.429	119.585	1751.51	1.06e-74	-3.36	9.12e-128	3.89
Tppp	822.55	806.028	10004.6	6.72e-62	-3.55	6.38e-18	3.58
Tppp3	127.086	313.649	11370.4	1.72e-215	-6.4	3.51e-31	5.08
Trdn	1.96814	0	41.4106	2.2e-09	-4.07	2.68e-08	6.55
Trim63	0	0.590296	4.10886	0.0155	-3.04	0.17	2.03
Trpc1	27.3763	14.9541	203.565	1.34e-25	-2.85	1.49e-24	3.72
Trpc3	540.067	147.092	5048.2	8.54e-20	-3.14	1.63e-104	5.09
Trpm1	4.668	1.59603	27.1268	0.000313	-2.36	2.74e-05	3.73
Trpm6	9.24263	30.5269	56.1003	9.73e-06	-2.39	0.0564	0.895
Trpv3	2.03027	0.293967	5.58842	0.287	-1.2	0.0467	2.89
Tshb	12.3632	38.6507	87.5572	2.15e-12	-2.71	0.00755	1.19
Tspan2	527.645	1412.96	3919.91	3.63e-89	-2.86	1.07e-17	1.5
Tsx	34.2195	7.86814	64.36	0.0183	-0.855	8.94e-10	2.98
Ttc9	253.224	53.3633	1616.38	1.99e-38	-2.62	1.11e-148	4.93
Ttll1	513.376	133.946	730.168	0.00144	-0.487	7.88e-45	2.47
Ttll11	6.73615	1.83044	19.3564	0.0221	-1.4	0.000379	3.1
Ttll6	0.313552	0.946181	51.1338	9.4e-13	-6	1.79e-10	5.24
Ttyh1	242.393	73.959	1495.27	1.65e-58	-2.59	1.76e-135	4.35
Tubb2a	362.84	1036.61	2543.78	4.25e-59	-2.77	1.35e-10	1.32
Tubb2b	10.5362	19.771	157.418	5.82e-18	-3.67	7.79e-13	2.97
Twsg1	6899.08	2649.8	14370.7	2.49e-31	-1.04	1.12e-165	2.47
Ucp2	1008.01	1794.48	11633.6	8.85e-89	-3.49	1.28e-33	2.71
Unc13b	1391.01	686.042	3938.26	1.4e-27	-1.48	8.41e-56	2.54
Upb1	2.75806	2.72561	16.8984	0.00137	-2.3	0.0118	2.42
Upk1b	4.58181	9.35451	295.233	2.04e-36	-5.72	2.28e-23	4.86
Upk3b	15.4211	24.4569	615.709	8.95e-14	-4.85	1.22e-07	4.3
Vsnl1	0.620757	1.89236	15.7528	0.000614	-3.37	0.00693	2.73
Vtcn1	1.7274	0.592659	15.499	0.00654	-2.51	0.00102	3.8
Wdr35	89.8426	22.9598	345.733	5.73e-23	-1.91	1.74e-38	3.92
Wdr54	93.8797	40.9278	254.408	5.07e-11	-1.42	7.9e-20	2.65
Wisp1	174.229	490.096	1572.33	5.53e-12	-3.03	1.45e-13	1.7
Wnt4	12.7027	24.8758	121.319	1.5e-12	-3.13	2.16e-06	2.27
Wnt9a	146.328	67.2995	777.072	4.98e-36	-2.37	3.33e-37	3.53
Wnt9b	32.7173	15.4409	87.7981	0.000146	-1.35	7.23e-08	2.47
Wt1	9.41052	19.0304	157.922	1.01e-14	-3.84	0.0778	2.4
Xirp2	2.15498	0	162.891	5.86e-30	-5.66	1.91e-15	8.34
Zap70	1.99597	9.68677	63.1479	4.74e-15	-4.52	1.02e-07	2.65
Zfhx3	3072.63	1669.62	12008.9	2.13e-68	-1.94	1.21e-106	2.87
Zfp385a	70.1394	14.6105	80.1545	0.697	-0.16	3.13e-07	2.42
Zic2	15.6939	4.32164	30.8728	0.108	-0.931	0.000452	2.7
5X-DEG	Average FPKM LN-LEC	Average FPKM LN-BEC	Average FPKM D-LEC	P-adjusted	Log2 FC	P-adjusted	Log2 FC
Dusp1	2615.46	8267.95	32307.9	2.21e-10	-3.41	7.2e-23	1.98
Fam102b	6625.49	3132.56	26107.8	2.33e-114	-1.96	8.96e-79	3.08
Tspan18	2349.51	2760.98	24734.8	8.77e-145	-3.37	1.93e-100	3.18
Akap12	1875.35	2676.18	21425.9	2.07e-12	-3.34	1.23e-73	3.02
Nqo1	3925.9	1094.15	15526.4	6.52e-105	-1.96	3.92e-120	3.84
Fosb	2331.12	8886.72	14042.1	0.000589	-2.35	0.0097	0.683
Ptgfrn	1685.73	1200.36	11160.1	9.27e-123	-2.7	1.27e-125	3.24
Rasgef1b	1161.88	872.609	10817.1	4.31e-72	-3.18	1.77e-97	3.65
Ccbp2	4054.79	1228.31	9737.91	1.16e-23	-1.24	1.7e-142	3.01
Nxn	5832.47	1690.06	8822.03	6.38e-09	-0.577	5.43e-85	2.41
Tanc2	2382.18	1199.5	8651.6	3.15e-71	-1.84	9.35e-146	2.87
Dennd4a	1078.02	392.602	8171.6	9.91e-167	-2.9	1.19e-194	4.4
Olfr1372-ps1	1676.1	528.906	6534.3	6.27e-65	-1.94	3.38e-151	3.65
Epb4.9	745.464	265.556	6383.66	1.18e-85	-3.06	1.8e-135	4.6
Otud1	903.061	636.741	6362.48	1.02e-75	-2.78	5.53e-111	3.34
Ccnd2	355.895	1280.42	6093.72	6.97e-114	-4.05	1.94e-25	2.27
2017-09-06	2130.24	519.849	4510.07	6.9e-25	-1.06	1.2e-125	3.14
Stox2	823.543	2085.7	4481.1	7.88e-92	-2.42	3.09e-12	1.13
Sord	1318.94	302.499	4294.18	2.27e-29	-1.68	3.16e-153	3.85
Galntl4	2188.12	682.118	3780.77	1.32e-09	-0.77	2.19e-56	2.49
Ralgps2	1019.11	466.926	3485.07	2.07e-38	-1.75	1.31e-58	2.92
Plce1	389.838	86.7727	3451.42	6.52e-99	-3.11	1.1e-264	5.34
Ssbp2	909.561	240.99	3294.35	3.21e-59	-1.83	1.09e-57	3.78
Rftn2	614.759	530.951	3031.81	4.5e-119	-2.28	3.37e-68	2.53
Mall	168.27	387.746	2832.8	2.76e-85	-4.01	1.41e-39	2.88
Bmp2k	1352.3	346.664	2748.58	1.42e-08	-1	7.19e-50	3
Ggct	241.792	233.915	2562.54	3.22e-161	-3.38	6.73e-140	3.47
Hspa4l	1508.7	457.479	2352.86	3.81e-10	-0.621	9.54e-72	2.39
Sgsm1	310.143	221.85	2296.6	8.46e-53	-2.85	2.49e-81	3.39
Sgms2	210.764	212.6	2081.91	1.29e-130	-3.27	1.52e-34	3.29
Tc2n	189.829	153.673	2054.38	2.1e-165	-3.4	9.44e-136	3.76
Fah	205.761	397.314	1921.35	2.53e-161	-3.19	9.79e-93	2.3
Ak4	430.605	127.152	1895.8	1.63e-70	-2.11	1.34e-13	3.8
Prrt4	78.5549	42.8442	1771.1	2.83e-31	-4.34	2.83e-127	5.36
Pkia	789.938	168.625	1542.19	1.97e-18	-0.944	4.12e-54	3.21
Antxr2	710.574	271.887	1347.46	8.46e-17	-0.905	3.57e-61	2.33
Sez6l	7.68507	5.3675	1211.19	6.05e-144	-7.04	6.5e-100	7.65
Itprip	292.246	122.691	1204.02	1.58e-23	-2	2.1e-59	3.31
Map4k2	472.683	148.708	1126.23	3.93e-21	-1.23	2.72e-76	2.94
Pmvk	386.15	200.927	1070.18	3.31e-23	-1.45	1.74e-37	2.43
Plekhg3	222.281	167.391	1069.49	1.54e-27	-2.23	1.91e-30	2.69
Fam124b	93.6787	178.562	940.277	3.12e-47	-3.28	3.02e-17	2.4
G0s2	241.661	165.308	938.818	1.25e-14	-1.91	0.000277	2.41
Nr3c2	233.411	120.285	851.762	1.87e-27	-1.84	8.82e-45	2.84
Khdrbs3	74.9738	43.3869	835.522	3.58e-52	-3.4	7.21e-49	4.26
Dusp8	112.211	204.642	833.548	1.01e-37	-2.83	1.14e-19	2.04
Plekhb1	149.795	83.6006	793.256	1.43e-39	-2.36	1.21e-38	3.26
Mfap3l	155.101	109.677	791.521	1.16e-44	-2.32	4.13e-38	2.87
Rgs16	258.061	134.036	746.619	1.53e-11	-1.49	5.75e-30	2.49
Svip	511.067	130.729	689.644	0.013	-0.411	4.57e-14	2.4
Egln3	67.9441	61.3666	673.666	1.35e-57	-3.23	2.3e-48	3.46
Scml4	25.4093	33.8762	672.002	6.69e-116	-4.65	3.61e-82	4.3
Agpat9	85.1405	138.836	624.961	4.43e-50	-2.84	1.05e-25	2.19
Lrrn2	7.17464	10.3045	606.696	1.7e-88	-6.27	6.22e-71	5.86
B3gnt8	65.0846	15.9102	582.73	8.7e-81	-3.12	1.06e-86	5.2
Ikbke	398.817	112.524	576.354	0.0206	-0.504	2.11e-26	2.37
Zdhhc14	171.36	68.3831	548.531	4.77e-27	-1.66	2.66e-52	3.02
Pir	59.2284	91.7579	536.294	9.04e-47	-3.13	9.96e-16	2.55
Akr1b8	83.7891	97.1664	534.621	4.28e-52	-2.66	7.74e-36	2.47
Tagap	71.1622	82.8521	499.677	1.14e-46	-2.78	3.29e-27	2.6
Fam176a	62.4099	312.437	479	8.8e-48	-2.88	0.00448	0.641
Nhedc2	37.2538	22.5126	469.995	3.12e-49	-3.63	3.99e-45	4.34
Inpp4b	88.2655	214.801	469.725	1.23e-30	-2.39	2.16e-07	1.15
Ankrd37	39.462	190.922	452.504	8.31e-44	-3.47	2.8e-06	1.26
Plin4	9.46702	34.3291	371.786	5.95e-59	-5.14	1.37e-27	3.43
Ppm1j	55.4293	182.222	367.367	1.17e-41	-2.67	1.24e-07	1.03
Has3	44.6649	153.403	355.776	4.95e-38	-2.95	1.47e-08	1.24
Rai2	27.8766	43.0479	351.144	2.63e-40	-3.53	5.25e-19	3.02
Ccdc92	198.638	60.8009	349.383	3.43e-07	-0.792	1.88e-30	2.54
5X-DEG	Average FPKM LN-LEC	Average FPKM LN-BEC	Average FPKM D-LEC	P-adjusted	Log2 FC	P-adjusted	Log2 FC
Lrrc3	193.531	41.4562	340.243	0.000375	-0.787	2.93e-26	3.04
Ccdc146	163.178	52.3361	339.34	5.34e-05	-1.04	4.1e-15	2.68
Spsb4	83.4682	27.5139	311.938	1.37e-21	-1.86	5.09e-33	3.49
Snx24	142.677	48.9553	297.735	4.77e-09	-1.04	1.92e-18	2.61
Klrb1c	0.630918	5.72811	287.448	6.88e-36	-7.74	1.01e-44	5.52
Tiam2	133.441	32.8814	259.787	5.76e-07	-0.945	2.54e-28	2.98
Sec16b	75.4157	47.4268	239.759	1.43e-12	-1.65	6.03e-11	2.34
Bean1	3.21664	14.0618	201.9	3.17e-41	-5.59	9.86e-32	3.82
Sel1l3	20.6994	26.8067	201.572	0.00352	-2.71	0.109	2.25
Arhgef16	16.6749	10.1226	195.261	1.61e-28	-3.42	3.21e-27	4.25
Dnajb3	82.9384	36.7696	191.768	2.22e-08	-1.18	1.11e-17	2.38
Bnc1	7.5762	3.73226	191.464	2.58e-08	-4.15	2.02e-21	5.46
Gsto2	69.3892	19.1826	187.675	9.89e-06	-1.38	1.08e-11	3.23
Atg9b	26.1078	76.4706	184.064	2.81e-16	-2.72	0.000504	1.28
Ptpn7	4.60202	21.62	181.683	8.22e-38	-5.1	1.85e-10	3.04
Magee2	23.2174	10.7672	178.998	4.42e-23	-2.88	3.25e-25	3.99
Serinc2	15.122	10.0777	177.192	1.03e-23	-3.42	0.00127	3.54
Iqca	1.67925	0	165.741	1.05e-31	-5.93	9.79e-16	8.38
Catsperb	17.1818	28.0408	162.472	1.46e-16	-3.13	4.85e-08	2.5
Fbxl21	70.5644	28.0853	154.251	3.1e-06	-1.1	1.6e-15	2.46
Apobec2	27.3232	22.2891	150.294	8.66e-15	-2.44	5.86e-16	2.74
Kbtbd10	11.4566	13.6567	149.33	4.07e-21	-3.51	1.71e-17	3.39
Ppil6	53.3099	15.6985	148.177	1.05e-07	-1.42	8.26e-12	3.2
Iqcd	31.5753	7.75757	145.127	7.01e-14	-2.14	2.08e-20	4.17
Lgr5	11.161	9.93445	142.109	1.1e-24	-3.54	9.41e-22	3.81
Fam69b	100.716	25.7241	139.618	0.0837	-0.446	4.55e-14	2.44
Fam71a	6.08234	23.3885	137.562	0.00019	-3.59	1.61e-07	2.53
Lrrc10b	49.6544	9.63103	105.107	0.000273	-1.07	3.17e-12	3.39
Scml2	50.8308	9.933	104.547	0.000219	-1.03	1.15e-16	3.35
Frmd7	14.8436	36.524	103.614	6.32e-08	-2.6	0.00164	1.5
Car10	0.279371	0	101.164	1.65e-18	-6.93	1.07e-12	7.73
Ccno	8.12397	13.9394	99.3746	3.01e-11	-3.3	1.08e-09	2.8
Pdcd1	4.78757	3.31118	94.6779	1.19e-18	-4.13	7.67e-16	4.71
N28178	16.8647	11.2124	85.3981	6.94e-09	-2.28	6.38e-08	2.84
Gldc	6.17805	8.1692	81.4138	7.35e-12	-3.46	1.5e-08	3.22
Fbxo27	14.0883	10.8343	77.5833	4.74e-07	-2.39	3.96e-07	2.79
Tpte	10.6498	7.1039	76.1062	5e-12	-2.77	1.53e-10	3.33
Rbfox3	11.0603	56.6654	70.9134	6.3e-08	-2.55	0.531	0.332
Ptgfr	16.1711	8.12054	63.1834	4.91e-05	-1.92	3.06e-05	2.85
Rbp2	0.313552	3.00395	59.6012	3.43e-14	-6.23	7.8e-10	4.07
Pkib	5.77846	10.1778	59.0489	7.7e-12	-3.18	0.000345	2.42
Thsd7b	3.47778	3.37401	56.8099	5.25e-08	-3.76	5.66e-10	3.89
Rdh16	6.99833	10.8102	54.7546	1.52e-06	-2.73	0.000133	2.28
Lrrn4	1.39988	1.06766	51.6675	4.06e-10	-4.37	5.54e-09	5.13
Micalcl	11.4701	6.0377	50.662	1.07e-06	-2.07	8.08e-08	2.99
Csrnp3	0.155189	0	50.272	1.25e-12	-6.01	3.09e-09	6.82
Nek5	33.03	7.74431	47.1076	0.336	-0.464	1.78e-05	2.52
Dusp14	20.7831	4.14915	46.8546	0.0194	-1.09	3.03e-05	3.31
Tmem151a	1.71041	5.56888	41.448	8.7e-07	-4	0.000738	2.72
Tmeff1	5.1741	7.52933	41.2793	3.38e-07	-2.86	0.0054	2.32
Bdh1	3.11595	4.20725	40.7897	1.63e-09	-3.5	2.82e-06	3.15
Zmat4	0.279371	0	39.2405	6.68e-11	-5.64	3.35e-08	6.51
Creb3l3	18.4788	5.50223	37.7953	0.0232	-1	1.53e-05	2.71
Mogat2	0	2.07431	35.0983	2.47e-09	-5.89	0.000276	3.58
Rgs8	0.92045	0	34.651	1.57e-09	-4.68	1.18e-07	6.33
C2cd4b	3.47898	1.36398	32.789	7.02e-07	-2.95	7.21e-07	4.24
Calcb	0	0	32.5461	1.46e-09	-5.9	2.42e-07	6.23
Zfp811	18.2576	5.90441	31.3946	0.102	-0.76	0.000407	2.32
Lrtm1	19.5508	3.73607	31.1135	0.307	-0.63	0.000581	2.88
Fam189a1	1.88894	3.49076	29.9134	1.2e-07	-3.57	2.02e-05	2.96
Apol7d	17.8689	3.4993	29.0544	0.299	-0.663	0.00627	2.76
Ckm	1.84142	5.02724	28.912	5.88e-06	-3.33	0.000488	2.42
Dhrs2	4.09147	0.592659	27.4969	0.000431	-2.52	2.18e-06	4.71
Mc4r	6.0263	0.355885	26.2467	0.0202	-1.91	2.23e-06	5.13
Srrm4	0.465567	3.84428	25.7978	3.1e-06	-4.26	0.00369	2.53
Zfp536	0.634092	0	24.2008	1.69e-07	-4.5	2.47e-06	5.85
Rnf208	12.3664	3.73371	24.0613	0.108	-0.912	0.00397	2.52
2017-09-05	16.6914	3.61315	23.8303	0.451	-0.454	0.00662	2.47
Hal	3.2858	9.04256	23.1248	0.0001	-2.58	0.0954	1.29
Igf2as	1.57475	2.5493	21	0.000135	-3.29	0.00284	2.78
Dio2	0.900128	7.97072	20.6719	1.93e-05	-3.58	0.173	1.28
Sobp	5.64268	2.5493	20.5481	0.0351	-1.63	0.00309	2.74
Rdh18-ps	0.558743	4.01677	20.2454	2.55e-06	-4.23	0.00459	2.2
Rpp25	1.5102	0.948544	19.3254	0.000223	-3.13	0.000475	3.72
Nacad	2.68139	4.48323	18.9579	0.00125	-2.53	0.0338	1.9
Pcnxl2	1.09267	2.60413	18.2261	5.02e-05	-3.37	0.0023	2.62
Speer4d	0.468741	0.652215	17.0434	9.65e-06	-4.06	0.000152	4.02
Acot6	4.69663	1.89236	15.7435	0.0658	-1.54	0.0024	2.79
Rpl3l	2.09296	1.60076	15.5812	0.00106	-2.52	0.00298	2.94
Ccdc160	0.279371	4.01677	15.3908	1.9e-05	-4.25	0.041	1.79
Ccdc154	2.78287	2.12441	15.2234	0.0144	-2.11	0.00984	2.53
Tmprss7	2.00677	2.70762	14.8249	0.00868	-2.33	0.0709	2.09
Golga7b	0.313552	0	14.6985	0.000266	-3.91	0.000419	4.87
Mef2b	2.28868	2.71471	14.6765	0.00377	-2.41	0.0189	2.21
Scrn1	3.59168	1.66031	14.0999	0.0243	-1.77	0.00922	2.74
Speer4a	2.0791	0	13.8256	0.0141	-2.32	0.000156	5.05
Gdpd4	5.1032	1.2997	13.8167	0.095	-1.26	0.00375	3.01
B4galnt4	0.279371	0.293967	13.015	6.91e-05	-4.04	0.000586	4.17
Il22ra1	0.465567	0	12.9993	0.000526	-3.41	0.000212	4.98
Wdr65	4.19541	1.76616	12.9188	0.0587	-1.46	0.0221	2.48
Ppm1n	1.03447	1.24251	12.7564	0.000856	-3.02	0.00434	2.94
Mogat1	3.05394	0.293967	12.6844	0.0485	-1.81	0.000983	4.08
Efhc2	0.7551	1.18532	12.3757	0.000726	-3.24	0.0217	2.78
Ptprq	0	1.18532	11.4918	6.86e-05	-4.43	0.0317	2.66
Pdzrn4	1.69957	0	10.9101	0.0218	-2.2	0.00117	4.57
Ppp1r36	6.71466	0.8819	10.0521	0.53	-0.557	0.0214	2.83
Accn1	3.90005	0.592659	9.88805	0.429	-0.95	0.0172	3.1
Ppp1r3a	0.934308	1.2997	9.83204	0.0137	-2.53	0.0374	2.49
Acsbg1	0.475729	3.60515	9.45307	0.00323	-3.13	0.351	1.21
Tm4sf5	2.79673	0	9.37801	0.188	-1.37	0.0022	4.38
Amdhd1	0.903302	2.30544	9.08935	0.00929	-2.58	0.157	1.71
Fam69c	1.09966	0.946181	9.05627	0.015	-2.38	0.0188	2.74
Zcchc5	0.630918	1.77798	8.73154	0.0144	-2.68	0.227	1.76
Fitm1	0.7551	0.590296	8.63867	0.00688	-2.75	0.0141	3.06
Coro6	0.592923	5.44595	8.61071	0.00477	-2.97	0.626	0.595
Ces1c	0	0	8.48309	0.000472	-4.03	0.00224	4.36
Uroc1	0	0	8.28597	0.000733	-3.93	0.0031	4.27
Ccdc135	0.155189	1.5412	7.80901	0.00229	-3.4	0.123	1.95
Ppp1r3g	0.558743	0	7.78273	0.0112	-2.79	0.00291	4.27
St8sia5	0.310378	0	7.5924	0.0104	-2.9	0.00446	4.15
Rimklb	0.155189	0	6.85685	0.00487	-3.21	0.00523	4.08
Arid3c	0.155189	1.23779	6.82889	0.00931	-3.07	0.171	1.92
Pah	0.155189	0.296329	6.72756	0.00608	-3.16	0.0226	3.17
Trap1a	1.26818	0.293967	6.59994	0.087	-1.91	0.0224	3.17
Asb11	0	1.83753	5.744	0.00355	-3.51	0.346	1.33
Lrrc66	0	1.18295	5.6215	0.0078	-3.29	0.254	1.69
Ttll2	0.279371	0	5.53798	0.0273	-2.68	0.0171	3.65
Hao1	0.313552	0.592659	5.42094	0.0229	-2.72	0.112	2.32
Neu4	0.869121	0	5.2128	0.124	-1.81	0.0173	3.64
Insl5	0	0	4.99655	0.0281	-2.81	0.0587	3.07
Sult4a1	0.155189	0	4.84441	0.0328	-2.64	0.0261	3.46
Hist1h4a	0.313552	2.70762	4.74986	0.0405	-2.51	0.692	0.641
Eddm3b	0	0	4.74307	0.00909	-3.22	0.0214	3.54
Clrn3	0.155189	0	4.55442	0.0346	-2.61	0.0271	3.44
Tmem211	0	1.30207	4.45308	0.0117	-3.14	0.299	1.47
Bhmt	1.4094	0	4.28013	0.381	-1.14	0.0331	3.35
Lemd1	0	0	4.17368	0.0433	-2.61	0.0828	2.86
Nkx6-2	0	0.587934	3.96386	0.0171	-3	0.219	1.92
Elovl3	0	0	3.77521	0.0213	-2.92	0.0418	3.23
Lcn13	0	0.296329	3.71586	0.0234	-2.88	0.136	2.35
Klhl30	0	3.3731	3.18465	0.0395	-2.65	0.992	-0.0187
Ly6g6f	0	0.592659	3.141	0.0397	-2.65	0.341	1.59

## Sheet: 5X-DEG LN-LEC+LN-BEC
5X-DEGs in LN-LEC+LN-BEC subset with average FPKM, p-adjusted, and log2 fold-change values in LN-LEC v D-LEC, LN-LEC v LN-BEC, and D-LEC v LN-BEC.
				LN-LEC v D-LEC		D-LEC v LN-BEC
5X-DEG	Average FPKM LN-LEC	Average FPKM LN-BEC	Average FPKM D-LEC	P-adjusted	Log2 FC	P-adjusted	Log2 FC
Aass	16.8552	76.623	1.50585	0.00229	2.91	5.18e-11	-5.26
Abcc12	11.3668	41.4689	0	6.43e-05	4.34	5.31e-08	-6.44
Abcg3	106.224	86.1506	10.0432	3.71e-16	3.26	3.04e-10	-2.95
Abpa	1627.03	6522.86	10.1658	2.14e-06	4.98	7.71e-06	-6.05
Abpb	2227.66	7490.02	14.9614	3.73e-06	4.89	4.44e-06	-6.09
Acot1	20.1308	62.3841	2.12437	0.0024	2.72	1.2e-06	-4.3
Acpl2	23.6207	34.1804	1.33457	3.03e-05	3.52	0.000117	-3.98
Acpp	15.2345	104.709	0.667287	0.000569	3.44	3.84e-14	-6.44
Acss1	200.107	1500.95	18.8344	2.66e-06	3.13	1.21e-94	-6.16
Actg2	6.22949	16.035	0	0.00453	3.39	8.49e-05	-5.17
Acvr1c	30.7544	17.5894	2.27615	5.61e-06	3.32	0.0199	-2.51
Adam5	116.038	109.989	0.419282	2.62e-18	6.8	4.81e-14	-7.01
Adamts18	9.87491	133.706	0.941576	0.00492	2.71	4.55e-18	-6.47
Adamts9	7947.28	11776.6	1526.94	4.45e-65	2.39	4.63e-108	-2.91
Adap2	136.669	214.134	9.60485	3.29e-26	3.78	1.19e-33	-4.41
Adarb2	12.0029	7.33268	0	5.89e-05	4.36	0.00525	-4.07
Adcy5	185.404	812.395	5.51337	2.55e-36	4.9	3.99e-75	-7.01
Adcy8	5.65035	15.7633	0	0.00516	3.35	0.000468	-4.84
Adh1	543.761	537.057	53.6338	6.72e-39	3.3	6.2e-21	-3.24
Adipoq	8.45523	59.9754	0.419282	0.0108	2.93	2.49e-08	-5.93
Adora1	5.71682	29.2675	0.274288	0.0215	2.7	2.64e-05	-4.96
Adra1a	7.45004	10.3693	0.548577	0.013	2.66	0.0395	-2.93
Adra2c	10.5082	14.5566	0.667287	0.00266	3.04	0.00186	-3.6
Adrb1	7.17882	17.7795	0.333644	0.0271	2.67	0.000924	-4.21
Agt	124.334	272.386	4.71679	7.03e-16	4.46	2.75e-09	-5.24
Aif1l	1305.62	1203.15	25.1513	5.35e-130	5.69	6.46e-124	-5.55
Akr1b10	211.111	322.668	39.9112	7.43e-26	2.4	1.29e-37	-2.97
Akr1c13	118.214	109.152	2.355	1.96e-22	5.32	2.15e-18	-5.26
Akr1cl	14.3938	6.3373	0	2.52e-05	4.53	0.0171	-3.65
Aldh1l1	131.521	68.0168	2.66236	3.18e-26	5.33	1.38e-12	-4.42
Aldh3b2	11.7415	27.0883	1.6945	0.0177	2.32	0.00155	-3.39
Als2cr12	3.85085	6.80194	0	0.0221	2.86	0.00804	-3.93
Amica1	6.20868	6.02589	0.333644	0.0227	2.67	0.046	-2.88
Amph	151.821	40.433	1.25785	3.19e-24	6.5	9.07e-07	-4.57
Amy1	70627.8	158658	362.613	2.3e-09	5.74	1.97e-09	-6.93
Amy2b	6.84175	9.54698	0	0.00867	3.21	0.0191	-3.65
Ap1m2	8.73826	29.2174	0	0.00187	3.65	9.84e-06	-5.69
Ap1s3	34.4716	21.8023	2.85101	1.73e-08	3.32	0.00138	-2.65
Aplnr	174.768	17184.1	14.6277	2.67e-18	3.47	4e-298	-10
Apoe	16171.3	27481.3	708.476	3.31e-144	4.5	4e-298	-5.23
Apol10a	91.6952	22.9415	0.667287	3.06e-17	6.12	0.000986	-3.99
Apol10b	1063.5	2227.08	144.616	2.55e-45	2.86	6.79e-87	-3.89
Apol7c	24.4524	297.464	0	1.54e-07	5.28	5.17e-19	-9
Apol9a	112.447	406.202	16.5265	1.49e-10	2.69	8.46e-56	-4.52
Apol9b	129.931	638.614	22.9938	6.57e-12	2.49	1.22e-73	-4.77
Aqp4	46.4071	18.4236	0.838563	4.32e-09	4.93	0.00106	-3.77
Aqp5	131.318	382.633	12.9154	0.00035	2.93	9.81e-05	-4.16
Aqp7	411.295	19635	44.0576	0.000124	2.88	5.25e-24	-8.02
Arhgap15	28.8272	145.821	1.08657	2.5e-07	4.13	3.18e-19	-6.58
Arhgef26	507.23	455.239	35.8998	1.49e-68	3.77	5.58e-37	-3.57
Arrdc2	2205.87	1089.74	152.115	8.86e-150	3.86	3.17e-58	-2.8
Art3	821.732	935.407	20.0783	4.35e-83	5.31	2.88e-59	-5.45
Aspg	40.1502	40.5988	2.11378	9.35e-10	3.95	7.37e-08	-3.99
Atp10b	29.3051	12.2107	0	1.25e-08	5.57	0.00326	-4.3
Atp2a3	369.088	1776.77	21.7411	7.52e-07	3.66	7.48e-23	-6.04
Auts2	194.023	198.687	25.9631	1.4e-28	2.88	5.33e-19	-2.87
B2m	477796	450780	69619.5	1.25e-104	2.79	4.89e-106	-2.66
B3galt5	17.1725	70.0572	0	4.73e-05	4.47	8.2e-05	-5.5
Bace2	1597.18	4917.53	194.789	1.49e-64	3.04	2.89e-113	-4.61
Bai3	22.546	4.3703	0	1.64e-07	5.24	0.0334	-3.33
Bche	98.9207	228.242	14.3568	3.82e-13	2.76	7.39e-27	-3.94
Bend4	2448.07	3780.69	252.224	1.31e-64	3.28	4.23e-96	-3.87
Bend5	576.857	652.365	64.1908	2e-78	3.15	5.07e-61	-3.28
Bglap	20.8471	51.1008	3.63022	0.00106	2.32	0.00018	-3.4
Bglap2	27.2584	54.532	0.822865	3.79e-06	4.02	1.38e-06	-4.96
Bglap-rs1	379.731	947.735	0.333644	1.36e-16	7.37	7.51e-13	-8.29
Bhlha15	125.215	428.748	15.2581	3.23e-08	2.9	1.53e-23	-4.64
Blnk	67.5158	63.482	4.09148	3.99e-14	3.94	9.66e-10	-3.83
Bpifa2	725459	1.64586e+06	2729.5	9.86e-07	5.22	7.58e-07	-6.42
Bpifa6	6.3091	6.16771	0	0.00295	3.5	0.0367	-3.32
Bpifb1	8.13281	18.4949	0	0.00133	3.72	3.18e-05	-5.37
Bpifb2	4.79652	8.48819	0	0.0104	3.13	0.00445	-4.15
Bpifb5	43.3842	1023.82	2.09641	3.11e-10	4.2	4.55e-10	-7.09
Bsn	5.55423	7.16727	0	0.0105	3.14	0.00738	-3.96
Bst1	2490.42	3564.51	41.353	5.64e-185	5.85	4.83e-212	-6.33
Btbd11	5059.13	1964.04	178.381	1.24e-302	4.82	1.98e-100	-3.42
C1ql3	658.886	188.983	17.3876	3.4e-99	5.2	1.16e-25	-3.38
C1rl	202.4	416.571	20.2933	8.71e-21	3.27	9.53e-36	-4.28
Cacna1h	9.12623	18.6798	0	0.000705	3.88	3.1e-05	-5.38
Cacna2d2	30.4051	60.8199	2.3393	1.84e-06	3.26	1.09e-07	-4.21
Cacna2d4	26.6864	18.2086	2.25366	4.42e-05	3.07	0.0129	-2.54
Calml3	55.1258	84.6786	0	1.85e-10	6.12	8.05e-06	-6
Calml4	205.082	171.821	15.5451	5.85e-06	3.33	0.00142	-3.06
Camk4	2347.12	6693.51	100.511	1.72e-119	4.51	4.22e-148	-5.98
Camp	4.83573	8.40178	0.333644	0.0422	2.43	0.048	-2.98
Camsap3	123.525	109.17	19.6675	1.69e-19	2.62	5.69e-10	-2.39
Cap2	286.402	82.5315	10.1394	5.25e-44	4.65	5.29e-08	-2.85
Car13	152.752	136.034	10.8037	1.85e-05	3.35	1.12e-08	-3.43
Car4	55.385	3539.86	4.03213	7.13e-10	3.62	6.07e-35	-9.06
Car6	12495.4	30280.8	41.5211	3.84e-07	5.37	4.49e-07	-6.55
Casp1	2866.64	693.597	39.8679	1.37e-238	6.12	1.11e-69	-4.05
Cblc	5.84799	13.4238	0.419282	0.0253	2.62	0.000771	-4.04
Cbr3	118.578	343.328	16.1683	1.92e-15	2.77	3.97e-40	-4.27
Ccdc129	6.90845	12.4894	0	0.00281	3.52	0.000453	-4.79
Ccdc67	312.669	392.454	30.214	3.62e-36	3.34	1.48e-37	-3.64
Ccdc85a	176.089	1323.17	9.21353	1.34e-35	4.14	2.3e-124	-7
Cckar	8.12522	6.98769	0	0.000844	3.82	0.00886	-3.9
Ccl19	19.4258	9.65084	0	1.39e-06	4.97	0.00194	-4.4
Ccl5	63.1638	106.897	5.07504	9.41e-09	3.49	1.75e-12	-4.29
Ccr7	6.49742	34.0398	0.419282	0.013	2.8	2e-07	-5.4
Ccrn4l	2298.87	2339.72	363.766	1.92e-88	2.67	4.31e-94	-2.65
Cd1d2	19.8343	25.311	2.90358	0.000484	2.5	0.000789	-2.82
Cd209b	151.105	58.2707	0.752925	6.04e-21	6.72	1.72e-09	-5.56
Cd22	28.2274	172.617	2.7637	1.63e-05	3.13	2.59e-24	-5.87
Cd247	897.461	847.666	3.41529	4.71e-73	7.76	2.36e-67	-7.75
Cd274	11611.8	9798.23	865.989	2.7e-110	3.74	8.33e-89	-3.46
Cd36	29438.4	43615.1	1196.55	6.51e-211	4.62	2.48e-108	-5.12
Cd44	2640.32	1887.96	127.826	1.17e-30	4.27	1.64e-40	-3.83
Cd53	1000.34	393.027	13.4288	9.62e-95	6.19	4.57e-55	-4.85
Cd74	1998.66	2516.5	64.0561	1.99e-154	4.97	1.13e-166	-5.27
Cd79b	362.35	370.259	9.75496	2.26e-52	5.23	3.5e-37	-5.21
Cdcp1	7.47221	7.35066	0	0.00172	3.65	0.0106	-3.85
Cdh1	57.2667	176.245	2.52795	2.35e-08	3.95	8.96e-05	-4.76
Cdh2	251.637	840.113	1.59149	4.33e-32	6.92	1.27e-46	-8.75
Cds1	96.163	85.2913	6.25739	5.11e-18	3.75	3.07e-06	-3.46
Ceacam10	13.4659	7.9996	0	1.67e-05	4.57	0.0213	-3.59
Ceacam16	43.2626	46.5826	0.822865	1.38e-10	4.77	4.13e-09	-5
Cecr2	721.723	829.981	52.2428	1.27e-64	3.75	2.63e-91	-3.92
Cel	79.4874	189.169	1.15651	7.39e-07	4.67	9.88e-05	-5.15
Cela1	200.614	348.537	16.3866	0.000201	3.12	0.00296	-3.57
Cela2a	243.416	417.849	7.89977	9.07e-06	4.04	9.49e-05	-4.61
Cela3b	75.066	140.603	0	5.23e-09	5.92	0.000175	-5.39
Celf6	8.36248	10.4614	0	0.00123	3.74	0.000977	-4.58
Ces1e	7.44751	17.2984	0	0.00397	3.44	0.000127	-5.12
Ces2b	49.3508	136.821	5.58163	4.17e-09	3.04	2.53e-21	-4.51
Ces2e	1786.11	1318.51	30.59	2.29e-42	5.69	1.01e-23	-5.23
Ces2g	7289.12	3666.8	77.0846	1.52e-80	6.43	1.07e-35	-5.42
Cfb	36643.8	12355.9	670.075	6.81e-293	5.76	2.02e-115	-4.16
Cfd	30.5509	454.558	4.65743	0.000178	2.52	2.68e-38	-6.37
Chdh	3.32379	7.81476	0	0.0307	2.73	0.00466	-4.12
Chia	19613.9	48701.1	116.588	4.8e-06	4.89	1.34e-06	-6.22
Chl1	73.2275	37.9183	3.27029	1.57e-16	4.24	0.000103	-3.21
Chrm2	34.031	10.571	1.21586	1.12e-08	4.15	0.0251	-2.56
Chrnb4	1221.47	280.828	1.17221	1.99e-57	9.31	2.24e-27	-7.51
Chst2	4018.03	7661.92	198.415	4.83e-144	4.34	3.01e-265	-5.23
Chst7	781.208	558.806	107.514	4.39e-64	2.87	2.8e-29	-2.34
Cited4	72.5232	182.931	3.5429	0.000198	3.53	9.14e-05	-4.6
Cldn1	89.2891	56.1155	5.30223	1.6e-17	3.86	0.000187	-3.08
Cldn13	113.834	178.336	0.333644	5.2e-18	6.77	1.98e-17	-7.66
Cldn22	159.7	389.268	16.8775	1.44e-05	2.96	5.26e-06	-4.05
Cldn8	9.06278	30.8073	0.274288	0.00187	3.34	7.58e-06	-5.11
Clec12b	476.132	389.946	22.031	3.84e-83	4.37	2.28e-50	-4.04
Clec14a	3333.74	12742.4	480.373	1.23e-37	2.78	7.08e-88	-4.66
Clic6	3.65819	13.5075	0	0.0216	2.87	0.000463	-4.8
Clps	176.64	364.139	0.419282	1e-09	6	1.79e-05	-5.88
Clu	108048	82110.5	839.515	1.24e-302	6.99	1.22e-273	-6.55
Col15a1	551.995	6414.08	91.975	3.47e-06	2.47	9.47e-25	-5.85
Col19a1	4.10291	5.03341	0	0.0139	3.03	0.0286	-3.41
Col28a1	7.42289	106.109	0.274288	0.00336	3.16	3.67e-14	-7
Col6a4	533.589	606.961	0.419282	2.65e-35	8.8	2.13e-29	-9.33
Coro1a	131.048	326.227	8.79601	0.000715	3.19	0.000354	-4.22
Cpa1	123.363	224.043	0.274288	8.9e-08	5.51	5.19e-05	-5.62
Cpb1	111.948	187.533	0	1.26e-06	5.29	0.000558	-5.07
Crisp1	2746.63	6518.45	11.9285	3.01e-07	5.33	4.9e-07	-6.45
Crisp3	21.7242	108.187	0	8.96e-07	5.06	5.6e-12	-7.6
Cryba4	10.4433	9.63286	0.274288	0.000426	3.6	0.00745	-3.57
Csf2rb	11398.9	21067.9	17.1341	1.24e-302	9.38	4e-298	-10.2
Csf2rb2	22075.8	17387.7	18.0274	1.87e-50	9.37	1.21e-33	-9.13
Csn2	17.7922	9.42733	0	7.1e-06	4.75	0.00905	-3.94
Csn3	17.1627	30.6664	0	1.63e-05	4.63	1.32e-06	-5.97
Cst10	6582.13	16279.4	22.0036	1.33e-09	5.97	4e-09	-7.14
Ctrb1	304.81	454.871	3.6722	3.18e-08	5.08	2.07e-05	-5.3
Ctrl	156.649	277.95	19.7815	0.000334	2.68	0.00108	-3.31
Ctsg	45.7275	147.474	2.36179	9.62e-10	3.94	1.62e-19	-5.64
Ctss	3669.6	1013.49	45.8114	2.42e-15	5.64	6.72e-06	-4.01
Cxcl1	1701.06	1700.07	136.996	2.11e-17	3.53	1.51e-56	-3.57
Cxcl13	1999.49	1434.35	230.836	6.43e-06	2.89	0.0009	-2.45
Cxcl9	3000.25	4412.84	20.1389	2.34e-30	6.7	5.79e-185	-7.63
Cxxc4	1214.2	1234.58	65.9633	1.71e-124	4.18	1.12e-114	-4.17
Cyp1a1	58.71	231.517	0	2.07e-12	6.45	5.52e-17	-8.65
Cyp26b1	306.363	3739.31	28.9087	1.16e-31	3.37	1.11e-42	-6.77
Cyp2f2	137.917	464.581	0.419282	1.94e-12	6.34	8.52e-11	-7.54
Cyp2j9	18.4579	433.998	1.66143	8.8e-05	3.05	7.16e-39	-7.61
Cysltr1	13.326	572.958	1.51644	0.00576	2.55	1.59e-43	-8
Cysltr2	9.28271	19.5564	0	0.000479	3.95	2.51e-05	-5.42
Dab1	491.407	1295.72	0.548577	1.18e-35	8.32	7.48e-43	-9.92
Dach1	17.1002	913.766	1.97937	0.000709	2.64	8.22e-58	-8.28
Darc	370.256	7321.44	4.75877	1.42e-54	6.21	6.85e-154	-10.5
Dcpp1	25328	68781.4	83.8682	5.59e-08	5.6	4.03e-08	-6.92
Dcpp2	31427	128710	128.277	0.0446	2.6	0.00775	-4.13
Dcpp3	29023.6	106796	139.486	0.0108	3.18	0.00143	-4.75
Dcst1	283.824	211.334	4.49506	1.77e-44	5.83	7.26e-31	-5.42
Ddr2	3350.49	2946.33	290.441	1.85e-57	3.51	1.95e-37	-3.29
Dennd2d	446.548	1022.58	26.2531	1.31e-72	4.07	4.73e-105	-5.23
Derl3	44.9595	102.798	5.55535	4.81e-06	2.85	3e-08	-3.94
Dmrta1	3.48268	6.28446	0	0.0437	2.59	0.027	-3.46
Dnahc8	649.552	350.342	3.39791	3.73e-60	7.41	1.23e-39	-6.59
Dnase1	21858.9	50619	136.36	1.91e-11	5.93	5.99e-09	-6.75
Dnase2b	16.1647	20.5527	0	5.5e-06	4.76	1.73e-05	-5.5
Dock10	3881.57	836.776	140.221	7.75e-277	4.8	6.38e-48	-2.55
Dpp10	46.8918	71.1389	0.274288	1.75e-11	5.64	4.1e-11	-6.42
Dram1	2976.29	7824	335.642	8.67e-93	3.15	4e-298	-4.51
Dsc2	92.0201	54.0916	1.24215	3.53e-18	5.55	8.87e-10	-4.88
Dsc3	1225.63	1248.64	13.0239	2.03e-44	6.3	4.45e-15	-6.05
Dsg1a	7.19155	4.90576	0	0.0012	3.73	0.023	-3.51
Dsg2	9806.75	12344.9	26.5176	1.24e-302	8.46	4e-298	-8.78
Edn1	2010.29	1745.49	230.141	1.27e-39	3.11	8.35e-38	-2.87
Egflam	498.501	356.696	33.8844	1.12e-66	3.82	3.23e-31	-3.31
Ehd3	4250.52	5331.29	196.157	8.28e-254	4.43	1.75e-193	-4.71
Ehf	323.702	386.534	0.607932	3.9e-12	6.52	3.15e-21	-8.07
Elf5	52.8512	122.876	6.70128	0.000126	2.74	7.2e-08	-3.92
Enah	84.3488	402.137	6.62111	1.42e-15	3.46	2.26e-46	-5.67
Enpep	905.781	505.133	23.1002	1.8e-108	5.23	2.06e-65	-4.37
Enpp2	11723.6	77888.1	449.464	1.24e-302	4.71	4e-298	-7.39
Epcam	134.599	402.986	4.91435	4.49e-08	4.21	3.54e-07	-5.37
Epha5	6.96468	13.6304	0	0.00241	3.57	0.000816	-4.68
Epha7	27.1834	39.6658	2.44743	6.21e-06	3.2	0.00137	-3.43
Ephx2	1011.61	395.639	68.5557	7.9e-85	3.84	8.58e-17	-2.46
Epsti1	219.817	95.7731	4.28692	1.85e-36	5.55	2.07e-15	-4.35
Esrp1	97.1302	223.011	0	1.67e-07	5.56	9.38e-07	-6.55
Expi	1534.95	6130.81	4.87237	6.31e-11	6.21	1.62e-10	-7.67
Extl1	1401.18	1174.01	6.51642	8.42e-107	7.61	2.87e-16	-6.78
Fabp4	24211.4	160839	3537.29	6.23e-48	2.77	1.63e-43	-5.38
Fabp5	705.505	2453.67	79.6253	9.74e-86	3.14	1.42e-141	-4.89
Faim3	14.6313	135.463	1.38714	0.000954	2.91	4.49e-19	-6.19
Fam155a	12.1466	7.39078	0	3.69e-05	4.44	0.00508	-4.09
Fam167b	36.6708	1736.5	1.85008	1.9e-08	3.82	1.8e-69	-9.35
Fam169b	91.3939	34.1702	1.66822	1.87e-17	5.28	1.6e-05	-3.88
Fam181b	554.111	314.515	1.49015	8.23e-47	7.81	1.16e-31	-7.15
Fam3b	11.536	7.5818	0	5.06e-05	4.38	0.0224	-3.56
Fam46c	154.74	872.216	11.2717	1.21e-19	3.65	3.38e-78	-6.1
Fam5b	10.5609	32.9338	0	0.000269	4.08	6.5e-07	-6.09
Fam78a	26.1175	97.6589	3.141	1.24e-05	2.87	3.69e-17	-4.78
Fbp2	8.10047	12.7461	0	0.00357	3.48	0.00166	-4.49
Fcamr	14.8517	5.63079	0	4.02e-05	4.46	0.0226	-3.53
Fcer2a	41.5388	97.8312	7.57671	2.72e-06	2.38	1.58e-12	-3.58
Fgf10	2839.56	640.581	7.31979	1.87e-160	8.44	1.4e-62	-6.31
Fgfbp1	8.26727	9.04637	0	0.00141	3.71	0.00192	-4.39
Fgfr2	419.354	4148.39	79.008	5.23e-16	2.39	5.8e-114	-5.64
Fkbp11	191.376	367.744	27.6911	1.56e-16	2.78	8.01e-21	-3.65
Fmnl1	199.6	210.347	11.1963	2.88e-38	4.14	1.13e-30	-4.18
Fndc7	330.779	87.7884	0.333644	6.05e-29	8.16	1.27e-12	-6.71
Foxf1a	25.1144	85.0078	1.27522	1.16e-06	3.71	1.68e-14	-5.54
Foxq1	88.7527	111.886	12.2829	4.17e-14	2.85	7.53e-13	-3.12
Frrs1	198.704	292.068	17.9502	1.28e-24	3.44	1.94e-34	-3.99
Fut7	56.2774	5146.24	5.15177	3.51e-11	3.38	6.43e-139	-9.86
Fxyd3	128.315	352.533	19.308	0.0099	2.33	0.00166	-3.52
Gabra4	9.58522	20.698	1.08657	0.0149	2.52	0.0143	-3.24
Galnt12	301.521	309.89	4.99108	3.42e-49	5.75	9.78e-44	-5.8
Galnt3	48.6456	105.236	0.667287	1.44e-08	4.96	1.86e-05	-5.37
Gata3	131.37	193.71	17.2324	1.31e-13	2.83	5.01e-14	-3.34
Gbp11	64.8039	59.7157	5.45401	6.64e-13	3.39	3.48e-09	-3.27
Gbx2	18.9217	21.2957	0.274288	1.34e-05	4.27	2.14e-05	-4.77
Gdf5	6.90584	8.82431	0	0.00166	3.65	0.00535	-4.1
Gdpd5	840.381	430.903	49.2507	3.11e-117	4.1	4.34e-41	-3.1
Gfra3	5.69107	16.4911	0	0.0105	3.14	7.55e-05	-5.2
Ggt6	172.225	319.114	6.70128	2.14e-31	4.61	1.89e-46	-5.51
Gh	20.4733	10.4274	0	5.16e-07	5.1	0.00209	-4.39
Gja5	13.9718	1033.61	0.607932	0.000559	3.42	1.63e-40	-9.63
Gjb1	12.0271	38.2322	0.667287	0.00348	3.08	2.15e-05	-4.73
Gjb2	231.928	80.4326	10.9814	1.38e-36	4.38	0.000956	-2.65
Glrb	8.72407	11.6227	0.419282	0.00326	3.18	0.0253	-3.26
Glycam1	71879.6	2.46982e+06	341.955	1.78e-42	7.28	5.98e-84	-12.1
Gna15	6.92817	4.43458	0	0.00227	3.57	0.0308	-3.37
Gnat3	3.42448	26.7299	0	0.0495	2.53	1.87e-06	-5.88
Gpa33	23.1111	24.9065	3.08164	3.17e-05	2.71	0.000258	-2.8
Gpc1	6279.59	2049.26	73.7397	1.24e-302	6.4	3.33e-185	-4.75
Gpd1	75.4923	139.33	11.3587	9.62e-11	2.7	4.26e-12	-3.49
Gpr126	404.498	843.272	53.7079	1.37e-32	2.89	1.1e-36	-3.89
Gpr176	32.6223	38.5694	5.57105	1.61e-05	2.49	0.00227	-2.58
Gpr35	877.05	356.349	21.2552	1.62e-123	5.35	9.15e-43	-4.01
Gpr88	35.0774	27.6661	3.50092	0.000104	3	0.00224	-2.71
Grem1	30.5904	35.9393	0	1.22e-08	5.58	3.05e-07	-6.2
Grhl2	17.155	39.3996	1.6945	0.00166	2.83	2.11e-05	-4
Grik2	17.8862	5.97197	0	3.03e-06	4.86	0.018	-3.63
Gucy2c	46.7593	11.7445	0	1.14e-10	6.09	0.000694	-4.68
Gyltl1b	12.4025	22.0113	0.967858	0.00686	2.8	0.000107	-3.86
Gzma	7.22702	90.1308	0.419282	0.00835	2.94	1.74e-12	-6.71
H2-Ab1	1063.45	2304.52	186.93	1.19e-25	2.5	3.56e-93	-3.59
H2-DMb1	103.041	85.3014	5.14665	3.11e-17	4.1	4.23e-14	-3.86
H2-DMb2	8.85642	50.502	0.667287	0.00414	2.87	9.22e-10	-5.47
H2-K1	221754	201711	28827.1	4.81e-174	2.96	3.1e-101	-2.77
H2-Oa	11.2325	35.6963	0.333644	0.000241	3.69	1.13e-07	-5.49
H2-Q4	443.197	446.929	62.1639	1.12e-44	2.82	4.97e-43	-2.8
H2-Q6	435.716	346.767	2.91037	5.87e-51	6.87	3.88e-39	-6.6
H2-Q8	193.892	206.016	3.61452	1.26e-35	5.41	4.91e-30	-5.52
H60b	77.4798	82.7849	0.548577	3.88e-15	5.87	1.64e-12	-6.15
Hcls1	91.379	712.288	7.34396	1.04e-14	3.47	5.78e-74	-6.42
Hcn3	28.4609	24.9679	2.12437	1.71e-06	3.32	0.000358	-3.14
Hcst	17.3435	32.1059	0.419282	6.7e-06	4.24	3.53e-07	-5.32
Hist1h2bj	17.1307	7.2684	0.548577	1.63e-05	3.84	0.0473	-2.69
Hmgcs2	106.038	401.677	16.563	4.38e-14	2.68	5.98e-44	-4.56
Hmha1	246.296	243.406	32.6127	9.54e-22	2.92	4.11e-14	-2.85
Hoxa10	41.5404	274.815	2.00186	1.25e-09	3.99	1.7e-07	-5.79
Hoxa9	8.84113	69.4236	0.607932	0.00491	2.86	1.06e-11	-5.91
Hoxb9	14.3034	292.437	0.967858	0.00019	3.24	9.9e-27	-7.55
Hoxc6	27.2931	15.4452	1.50585	1.72e-07	3.82	0.00784	-2.91
Hs3st3b1	10686.9	10257.9	220.231	6.06e-194	5.58	1.12e-274	-5.5
Hs3st6	143.112	120.339	0.752925	4.61e-22	6.72	1.65e-16	-6.68
Htatip2	298.285	350.862	46.406	1.44e-23	2.64	1.25e-19	-2.83
Hunk	479.926	176.862	5.82964	5.53e-64	6.24	1.18e-25	-4.8
Id4	51.0476	362.807	8.03074	7.52e-06	2.52	5.6e-49	-5.34
Ifi203	1021.59	9250.57	67.5226	1.97e-81	3.92	4e-298	-7.06
Ifi47	4690.17	4917.21	224.9	2.71e-156	4.37	2.44e-142	-4.4
Ifrd2	5385.6	2068.63	129.747	1.24e-302	5.37	1.91e-169	-3.95
Igfbp7	58385.3	140674	2552.95	1.92e-226	4.52	4e-298	-5.74
Igfbpl1	20.0551	12.5404	0	8.08e-07	5.04	0.000466	-4.78
Igsf5	12.2341	26.0088	1.00093	0.0159	2.65	0.00121	-3.79
Il12a	65.1402	16.2859	0.88222	1.15e-14	5.35	0.00184	-3.43
Il12rb1	34.706	13.8831	1.37144	6.35e-07	3.89	0.019	-2.69
Il1r2	18.2127	39.2036	1.59149	7.42e-05	3.19	1.25e-07	-4.35
Il2rg	18644.3	11456.4	2231.5	1.19e-173	3.07	3.89e-76	-2.33
Ildr1	42.4567	98.6441	1.24215	1.23e-06	4.19	5.74e-10	-5.53
Inmt	281.033	278.32	34.8874	4.28e-07	2.84	1.97e-12	-2.9
Ipcef1	3.7474	22.8246	0	0.0423	2.6	7.54e-06	-5.65
Irf7	1737.88	2280.76	312.477	9.82e-35	2.48	9.41e-58	-2.83
Irx1	12.5634	14.1673	0.419282	0.000483	3.63	0.0051	-3.75
Irx2	214.787	125.201	4.53872	2.29e-35	5.35	1.84e-08	-4.38
Irx3	712.486	195.345	30.8604	6.69e-75	4.47	1.12e-16	-2.59
Itga2	1014.67	1469.77	18.4271	5.31e-110	5.68	7.86e-109	-6.19
Itgae	17.7339	15.0859	1.49015	0.000234	3	0.0128	-2.76
Itgb7	30.7927	81.6385	5.72663	0.000108	2.32	1.31e-12	-3.74
Jam3	16135.1	6502.12	177.402	1.24e-302	6.5	4e-298	-5.15
Kcne4	41.9327	91.1091	3.97956	5.36e-07	3.2	2.23e-12	-4.34
Kcng3	68.1464	39.9262	0	2.41e-13	6.64	7.63e-08	-6.39
Kcnh1	67.9557	313.483	0.967858	2.52e-15	5.41	1.22e-28	-7.67
Kcnj16	5.21722	11.5517	0	0.00727	3.24	0.000939	-4.61
Kcnma1	121.65	201.456	13.3067	6.93e-15	3.09	1.36e-11	-3.73
Kcnmb1	3.93371	11.9648	0	0.0375	2.66	0.000718	-4.68
Kcnn4	208.221	545.669	3.44157	8.15e-12	5.18	4.57e-11	-6.34
Kcns1	31.431	91.2911	2.08071	3.24e-05	3.42	0.000607	-4.25
Kctd14	11.0269	44.3849	0.667287	0.00641	2.94	1.05e-05	-4.89
Kdm4d	26.9919	72.8388	3.01717	0.000617	2.69	0.0124	-3.39
Kifc3	281.965	616.222	31.914	1.2e-20	3.12	8.25e-42	-4.22
Kitl	2474.13	14892.6	249.053	1.96e-119	3.31	4e-298	-5.85
Klhdc7a	5.56596	52.7189	0	0.0242	2.85	3.67e-08	-6.57
Klhdc8a	23.4307	23.6427	1.75386	6.45e-05	3.25	0.000271	-3.36
Klhl29	2108.7	586.949	24.2062	1.89e-209	6.39	1.21e-66	-4.52
Klhl6	893.011	783.575	69.8894	4.75e-114	3.67	7.79e-77	-3.44
Klk1	607.656	4389.28	16.6368	1.39e-19	4.91	3.5e-14	-7.06
Klk1b11	4.59314	14.7632	0	0.0209	2.9	0.000849	-4.69
Kmo	6.92103	42.2671	0	0.00452	3.4	6.42e-08	-6.43
Kndc1	3.67269	7.76992	0	0.0485	2.54	0.0308	-3.42
Krt23	35.7021	64.5497	1.85008	2.98e-06	3.69	4.73e-06	-4.42
Krtdap	18.6244	9.33089	1.08657	5.25e-05	3.48	0.0336	-2.58
Lad1	7.26187	10.9487	0.419282	0.00813	2.95	0.0063	-3.59
Lama5	3308.97	8924.26	342.809	9.09e-178	3.28	9.2e-281	-4.66
Lancl3	3.56501	76.2913	0	0.0287	2.76	7.44e-11	-7.26
Laptm4b	9347.33	3572.87	607.954	7.55e-265	3.95	4.25e-74	-2.52
Lcn12	5.6411	30.9191	0	0.00601	3.3	5.48e-07	-6.08
Lcp1	549.794	12894.2	80.9409	6.89e-27	2.76	1.94e-224	-7.26
Lcp2	452.599	1299.51	3.42208	8.44e-17	6.16	2.79e-13	-7.29
Lgals12	9.13961	20.1099	0	0.000263	4.06	1.92e-05	-5.47
Lhx8	54.766	76.2805	2.00186	1.04e-10	4.32	0.0026	-3.94
Lifr	26987.5	17590.4	1729.48	5.55e-175	3.97	5.73e-119	-3.31
Lipg	25.2063	768.004	3.97065	0.00154	2.4	1.57e-66	-7.38
Lman1l	32.2638	76.8347	3.83457	0.00548	2.59	8.27e-05	-3.81
Lmod1	34.2582	105.022	3.06594	6.45e-08	3.18	1.68e-14	-4.74
Lpo	918.928	1804.47	1.67713	6.48e-11	6.41	4.3e-06	-6.23
Lrmp	50.8711	60.1425	3.89392	4.75e-11	3.57	2.06e-10	-3.8
Lrrc16a	2926.87	1316.6	224.174	1.62e-102	3.7	5.32e-35	-2.51
Lrrc26	35.2266	106.395	0.752925	3.69e-06	4.36	5.12e-06	-5.49
Lrrc33	4551.62	8017.92	236.624	1.24e-302	4.28	2.18e-283	-5.04
Lrrc3b	491.961	1116.5	0.967858	3.34e-41	8.11	3.28e-47	-9.42
Lrrc4c	11.1781	58.6607	0.548577	0.000827	3.25	3.66e-10	-5.67
Lrrc63	6.8925	44.365	0	0.00217	3.59	3.17e-08	-6.52
Lrrc8b	288.447	153.697	21.9416	5.39e-49	3.66	8.98e-09	-2.7
Ltbp2	22213.8	8279.99	107.915	1.24e-302	7.68	4e-298	-6.23
Ltf	4.61663	20.3085	0	0.0112	3.1	4.6e-05	-5.34
Ly6c1	351.168	30391.9	47.3669	1.28e-05	2.7	3.41e-46	-8.83
Ly6d	12.2845	112.362	1.33457	0.0092	2.57	3.48e-17	-5.93
Ly6i	268.49	2964.55	5.02415	6.02e-46	5.58	4.78e-128	-9.01
Ly6k	24.8342	23.7864	0.752925	2.15e-07	4.3	1.71e-05	-4.34
Ly75	126.313	107.007	3.87822	1.21e-24	4.78	6.57e-16	-4.54
Ly86	20.937	51.1982	3.51662	0.000701	2.45	1.51e-07	-3.72
Lzts2	286.378	636.262	52.9911	9.52e-32	2.42	4.74e-69	-3.53
Madcam1	3505.32	8524.96	3.09734	2.88e-112	9.9	1.08e-82	-11
Man1a	14847.4	12003.3	1849.34	1.41e-78	3.01	1.59e-48	-2.66
Mcc	2264.45	6962.7	308.585	7.21e-82	2.88	1.13e-271	-4.45
Mcf2l	479.698	14846.6	86.3269	2.12e-24	2.46	4e-298	-7.36
Mcoln2	11.0093	11.6552	1.42021	0.0117	2.46	0.0213	-2.59
Mcpt8	4.83966	242.229	0	0.00996	3.14	7.7e-06	-6.16
Mdga2	282.997	198.394	0	8.66e-25	8.42	3.03e-16	-8.48
Mecom	607.039	6564.32	6.21752	2.7e-65	6.36	1.11e-181	-9.78
Mfng	239.526	5807.57	21.098	1.25e-35	3.52	2.69e-250	-8.08
Mfsd2a	3.84057	19.5844	0	0.0214	2.88	2.45e-05	-5.43
Mir5109	43.6651	89.1788	3.08164	1.56e-09	3.61	9.55e-15	-4.63
Mlc1	14.6434	6.40212	0	0.000206	4.18	0.0169	-3.66
Mlph	436.94	266.726	3.27029	6.66e-50	6.75	8.63e-10	-5.6
Mmp3	34.1102	41.6084	2.85101	1.76e-06	3.24	0.00017	-3.42
Mmp8	30.9759	16.9821	0	1.61e-08	5.56	7.32e-05	-5.21
Mnda	187.495	472.561	12.8001	6.99e-35	3.81	3.43e-64	-5.11
Mndal	1891.28	11594.5	123.033	8.11e-82	3.92	4.61e-235	-6.49
Morn5	14.0179	19.2521	1.83949	0.0018	2.6	0.00173	-3.04
Mpo	19.8064	278.37	0	7.01e-06	4.78	7.44e-06	-6.18
Mpped2	36.1294	79.3011	3.74214	3.65e-07	3.08	4.39e-12	-4.2
Mrap	4.89922	13.6874	0.419282	0.0429	2.41	0.00509	-3.74
Mrgprg	7.66564	12.1468	0.274288	0.0304	2.66	0.00315	-3.84
Ms4a3	4.98208	45.926	0	0.0135	3.05	0.00186	-4.62
Ms4a4c	6.56826	80.7911	0.419282	0.00965	2.88	2.61e-12	-6.61
Ms4a4d	118.43	313.809	19.991	1.28e-08	2.52	2.92e-19	-3.88
Ms4a6b	130.436	2057.16	3.18298	1.23e-24	5.27	2.78e-82	-9.24
Msc	298.669	89.0652	6.48502	1.28e-14	5.02	7.08e-08	-3.52
Mup5	302.417	598.128	0.419282	3.39e-13	6.8	5.32e-10	-7.49
Mx1	1549.77	411.829	3.85194	2.18e-93	8.31	1.69e-47	-6.49
Mycl1	7.93593	207.404	0.333644	0.00381	3.14	7.2e-19	-7.88
Myh11	122.781	487.086	16.7063	9.66e-19	2.8	4.96e-44	-4.73
Myh15	56.8998	35.7255	0	4.54e-12	6.39	3.61e-07	-6.18
Myof	743.484	1241.78	68.276	1.07e-14	3.34	3.6e-46	-4.13
Myrip	271.877	1617.17	4.31867	1.49e-39	5.61	2.49e-24	-7.78
Naip5	195.84	178.063	31.9051	5.04e-24	2.63	7.44e-14	-2.45
Ncald	200.852	325.617	27.48	1.45e-16	2.85	2.2e-11	-3.44
Ncf4	24.7879	26.8466	0.607932	2.18e-07	4.33	2.99e-06	-4.58
Nckap5	1102.09	1173.21	29.8489	2.13e-151	5.16	5.01e-111	-5.21
Ndst3	11.8077	1195.39	0.333644	0.000157	3.76	2.68e-36	-10.2
Nefh	64.7574	841.051	5.50279	7.31e-11	3.39	3.39e-67	-7.11
Neto2	1197.17	319.427	18.7989	7.65e-115	5.92	3.9e-42	-4.01
Neurl3	1804.95	2410.61	37.014	4.94e-127	5.55	6.75e-167	-5.95
Nfam1	14.1993	24.4957	1.42021	0.00353	2.74	0.000143	-3.65
Nfasc	22.7563	15.5255	1.4465	1.62e-06	3.59	0.00922	-2.92
Nfatc4	523.982	1116.23	11.2277	3.9e-79	5.6	2.52e-27	-6.36
Nfkbid	96.7079	340.277	7.22357	4.52e-18	3.67	6.43e-49	-5.47
Nkg7	5.93607	74.6993	0.274288	0.0169	2.76	3.91e-11	-6.47
Nlrc5	5128.73	4933.45	733.929	1.2e-236	2.82	1.64e-135	-2.72
Nlrp10	162.359	95.7182	1.95142	4.19e-25	6.07	2.52e-15	-5.41
Nmnat2	172.984	111.019	12.7942	6.77e-20	3.64	1.63e-07	-2.96
Nos2	1264.65	972.414	38.0921	1.63e-158	5.04	1.14e-95	-4.62
Nostrin	1001.71	4143.94	86.1256	1.22e-51	3.51	2.88e-128	-5.51
Nphs1	15.612	33.7837	0	3.94e-05	4.47	3.22e-07	-6.17
Npnt	79.1975	59.7318	9.27121	4.05e-13	3.03	1.39e-07	-2.61
Nr5a2	832.471	954.52	39.0167	1.34e-114	4.37	3.58e-87	-4.53
Nrp1	665.636	46414	105.901	1.5e-20	2.63	4e-298	-8.69
Ntrk1	52.8371	15.4669	0	1.32e-11	6.29	0.000497	-4.82
Nuak2	487.746	482.458	83.9839	6.57e-57	2.55	2.05e-32	-2.49
Nup210	93.4487	288.265	15.9988	1.41e-13	2.54	4.71e-34	-4.12
Nxph1	84.7999	691.827	7.8353	1.37e-15	3.32	4.81e-74	-6.32
Oas1a	149.901	250.32	18.6959	4.53e-23	2.96	7.35e-33	-3.67
Oas1g	17.0598	38.3005	1.33457	0.000625	3.06	3.82e-07	-4.34
Oas2	107.715	435.093	8.07272	1.97e-20	3.66	4.31e-59	-5.65
Oas3	34.2955	33.8021	1.66822	5.05e-08	3.9	0.000288	-3.72
Oasl2	1561.2	4343.19	269.973	8.79e-30	2.53	6.07e-65	-3.95
Odam	21.2447	31.9203	0	5.35e-06	4.83	3.03e-06	-5.88
Oit1	79.1278	3409.05	0.274288	2.2e-13	6.17	4.89e-51	-11.6
Olfr558	10.7662	120.139	0.274288	0.000305	3.66	3.81e-15	-7.18
Olfr56	14.0704	36.756	0.941576	0.000451	3.15	1.45e-07	-4.63
Olr1	48.5921	26.226	2.63608	2.87e-09	3.85	0.00056	-2.98
Opcml	4.23646	8.76513	0	0.0246	2.83	0.00518	-4.11
Orm2	9.61088	20.6208	0.752925	0.0026	2.95	5.82e-05	-4.14
P2rx1	3.37564	21.1341	0	0.0325	2.71	3.66e-05	-5.39
P2rx3	24.804	105.539	3.86085	0.000198	2.49	1.65e-17	-4.62
Padi2	41.2467	114.438	3.88713	9.23e-05	3.05	7.56e-10	-4.55
Panx1	390.161	276.057	31.8784	2.76e-63	3.6	1.64e-31	-3.07
Papss2	1857.39	7079.34	49.9866	2.95e-33	5.04	3.88e-43	-6.88
Pax9	246.782	460.725	1.38714	4.4e-13	6.12	2.65e-10	-6.83
Pbld1	21.7935	130.771	3.60394	0.000319	2.4	5.02e-20	-4.94
Pcdh7	6475.25	2843.92	484.588	6.9e-116	3.73	4.64e-33	-2.51
Pcsk5	702.344	464.236	42.3064	3.47e-109	4.02	1.91e-38	-3.38
Pdcd1lg2	25.4094	42.5946	0.419282	4.75e-07	4.65	1.08e-07	-5.6
Pde1c	1772.68	4357.14	15.0364	3.64e-153	6.79	8.2e-219	-8.06
Pde3a	21.0256	27.0551	1.24215	1.05e-05	3.49	3.49e-05	-3.86
Pdgfc	1108.32	231.864	15.3021	2.24e-13	5.43	0.000117	-3.49
Pdk4	576.517	665.199	72.8799	9.36e-55	2.96	8.67e-47	-3.13
Pex11a	148.676	43.1729	2.3707	1.17e-26	5.8	1.37e-05	-3.85
Pf4	851.204	1554.29	74.2829	2.07e-54	3.51	1.52e-58	-4.33
Pgpep1l	39.9212	8.92962	0.822865	1.68e-10	4.69	0.043	-2.6
Phactr1	244.586	550.425	33.6377	7.94e-38	2.84	1.65e-73	-3.96
Pi15	76.7437	145.639	5.95893	7.27e-15	3.55	7.92e-16	-4.41
Pigr	94.3883	232.124	3.90283	0.00103	3.43	0.000571	-4.45
Pik3r3	1573.93	2424.69	307.28	5.01e-59	2.36	9.65e-89	-2.94
Pik3r5	30.49	133.434	0.333644	5.06e-08	4.93	1.73e-15	-7.28
Pip	36272.9	79074.6	73.7723	7.05e-08	5.68	2.61e-09	-7.34
Pip5k1b	70.2965	43.2731	5.44343	4.44e-15	3.58	9.2e-05	-2.79
Pitx1	10.3315	22.744	0.419282	0.00283	3.28	0.000192	-4.52
Pklr	8.54287	9.03456	0	0.000384	3.98	0.00226	-4.34
Pkp1	4.42606	5.80656	0	0.0355	2.68	0.0233	-3.52
Pla2g16	3709.24	3275.38	529.966	4.48e-113	2.81	1.69e-90	-2.59
Pla2g1b	39.2843	52.2128	0.548577	6.59e-08	4.76	5.33e-06	-5.13
Pla2g7	128.507	48.9304	4.18558	2.4e-24	4.7	7.8e-05	-3.22
Plac8	350.62	318.95	17.5347	1.47e-33	4.26	1.13e-16	-4.05
Plcb2	4.61282	26.9775	0.333644	0.0349	2.48	2.52e-06	-5.08
Plekha2	290.917	892.078	25.242	3.3e-38	3.54	3.27e-86	-5.13
Plscr1	630.459	1355.04	39.2435	3.66e-79	3.98	5.86e-112	-5.04
Pm20d2	261.615	296.781	39.7069	3.4e-34	2.71	2.75e-28	-2.85
Pnlip	171.219	405.597	1.95142	2.81e-05	4.44	0.000709	-4.82
Pnliprp1	70.9262	178.116	1.11285	0.00205	3.59	0.00285	-4.38
Pnmal2	705.367	282.008	2.97863	3.46e-63	7.68	1.83e-34	-6.43
Pon3	258.785	291.892	13.2893	6.77e-51	4.21	3.95e-32	-4.33
Ppfia2	139.09	41.3999	0.548577	3.09e-21	6.68	1.87e-08	-5.21
Ppp1r1b	83.1674	182.359	0	1.34e-08	5.84	9.45e-08	-6.87
Ppp1r3b	30.6138	63.063	3.79259	1.59e-05	2.77	2.86e-09	-3.78
Prb1	146.632	345.764	0	3.78e-13	6.89	6.36e-09	-7.38
Prex1	4932.68	3819.12	723.282	4.28e-56	2.77	2.09e-32	-2.36
Prg2	21.3812	438.512	1.54951	1.23e-05	3.29	4.53e-09	-6.53
Prkcb	171.449	449.138	29.1597	1.43e-17	2.54	9.83e-38	-3.88
Prnd	252.071	3516.48	3.96386	6.58e-40	5.77	5.74e-125	-9.54
Prnp	7318.6	8592.01	599.973	1.68e-157	3.61	4e-298	-3.81
Prodh	159.973	238.235	11.5265	3.19e-28	3.66	1.88e-25	-4.2
Prol1	178.07	373.355	0	0.00309	3.62	0.000668	-5.03
Prom2	69.7028	143.533	0	3.77e-08	5.69	5.7e-06	-6.16
Prpmp5	288.786	697.849	1.17221	4.35e-12	6.22	1.59e-10	-7.25
Prss12	371.725	468.576	63.9334	1.78e-25	2.51	1.8e-26	-2.8
Prss2	120.864	220.87	0.419282	1.53e-09	5.83	0.0014	-4.72
Prss34	13.6698	458.024	0	2.02e-05	4.55	0.00786	-4.13
Prss8	10.4732	34.3629	0.88222	0.0268	2.51	3.73e-05	-4.35
Prtg	1821.41	753.945	63.6316	1.45e-145	4.81	4.14e-55	-3.51
Psd4	24.9572	34.909	1.72078	1.94e-06	3.47	7.76e-07	-3.98
Psmb8	4678.77	4348.39	563.626	6.95e-114	3.06	1.62e-101	-2.91
Psmb9	4288.49	4158.63	562.981	1.95e-95	2.93	7.6e-92	-2.85
Ptgir	296.898	86.6578	15.122	7.47e-52	4.24	2.02e-06	-2.41
Ptpn6	113.723	76.6822	9.9474	4.64e-19	3.48	1.5e-07	-2.86
Ptprr	11.411	417.829	1.59149	0.00655	2.5	2.35e-35	-7.78
Pxmp2	1035.02	1141.88	125.418	1.05e-49	3.04	9.52e-86	-3.15
Pydc4	25.1725	1308.42	1.67713	3.3e-06	3.61	1.21e-53	-9.35
Pyhin1	8.171	146.744	1.08657	0.0138	2.41	7.45e-20	-6.61
Rab17	6.69996	27.5571	0.752925	0.032	2.39	0.000121	-4.3
Rab42-ps	63.0325	63.2626	9.93338	9.45e-08	2.54	1.06e-06	-2.54
Rac2	84.4184	286.949	8.96005	8.71e-12	3.17	1.14e-40	-4.96
Raet1a	11.6375	5.13781	0	0.000143	4.21	0.0218	-3.53
Raet1c	11.7223	5.49133	0	5.66e-05	4.36	0.0164	-3.65
Raet1d	11.7408	10.3461	0.274288	0.000491	3.64	0.0032	-3.75
Raet1e	294.569	161.58	7.24985	2.14e-53	5.28	4.6e-26	-4.39
Rap1gap	670.584	391.811	11.343	5.15e-93	5.81	9.72e-47	-5.01
Rapgefl1	12.8763	7.68384	0.752925	0.000437	3.34	0.0411	-2.67
Rapsn	129.269	40.7822	4.67313	6.56e-24	4.67	3.33e-06	-3
Rasa4	2290.07	2765.2	266.817	7.38e-140	3.11	1.7e-126	-3.34
Rasal1	2585.46	1351.92	23.8849	2.58e-210	6.66	1.8e-120	-5.7
Rasgrp1	22.9247	201.016	1.92513	6.26e-05	3.21	5.79e-26	-6.5
Rasl12	19.1008	101.767	0.838563	2.22e-05	3.82	1.16e-14	-6.42
Rasl2-9-ps	18.226	14.747	1.86578	0.000125	2.98	0.0149	-2.62
Rassf2	1071.51	1001.64	110.04	2.82e-74	3.29	4.79e-79	-3.16
Rassf6	1578.42	1313.42	1.59149	1.16e-68	9.45	6.07e-53	-9.35
Rbm47	492.535	9057.27	37.4655	3.05e-12	3.55	4e-298	-7.84
Rbp1	3520.12	5413.37	205.306	7.66e-132	4.09	7.04e-213	-4.67
Rdh1	31.7158	467.717	1.83949	4.05e-08	3.8	1.62e-39	-7.7
Reg1	134.482	258.784	3.17786	5.61e-05	4.06	0.00437	-4.12
Reg2	19.6767	32.5153	0	2.54e-06	4.91	6.99e-06	-5.78
Reg3g	258.877	336.762	0	1.82e-23	8.27	8.15e-20	-9.15
Relt	828.568	648.736	17.77	4.03e-125	5.54	1.04e-83	-5.14
Rgl3	853.54	620.185	89.6541	1.57e-114	3.25	2.94e-55	-2.74
Rgs13	4.8852	4.1477	0	0.00669	3.26	0.0476	-3.16
Rgs5	3810.44	4467.97	66.2247	1.02e-50	5.69	5.48e-140	-5.98
Rhbdl2	22.0486	229.996	0.274288	8.4e-07	4.57	4.44e-20	-8.04
Ripk4	17.8353	34.6271	0.967858	0.000161	3.43	0.000193	-4.2
Rnase1	179.411	374.899	25.6261	5.04e-05	2.62	0.000121	-3.47
Robo1	3626.5	1200.67	25.7278	2.41e-207	7.09	2.05e-137	-5.49
Robo2	117.814	1262.89	1.95142	3.36e-20	5.6	2.09e-56	-9.07
Rrad	151.68	223.914	12.87	1e-27	3.48	8.53e-28	-4
Ryr2	3.63036	12.8226	0	0.0212	2.88	0.000358	-4.84
S100a8	46.7585	109.909	1.66822	0.00312	3.29	0.000248	-4.6
S1pr3	440.777	258.949	23.486	9.24e-35	4.18	1.48e-21	-3.41
Samd5	37.4857	120.083	2.06501	9.21e-09	3.72	1.29e-18	-5.41
Scara3	695.547	224.641	26.4091	8.38e-94	4.73	4.94e-14	-3.02
Scd1	8023.85	5916.57	779.703	1.79e-66	3.36	1.04e-30	-2.87
Scube3	9.85274	35.7167	0.822865	0.00462	2.74	2.22e-07	-4.62
Sema5a	5209.8	3821.82	194.476	1.58e-98	4.71	6.52e-60	-4.23
Sema7a	2332.49	9253.2	274.296	6.4e-89	3.1	4.42e-202	-5.04
Serpina10	40.7918	46.2645	0.419282	8.97e-10	5.33	1.13e-07	-5.65
Serpina1b	317.03	4380.2	17.0747	1.43e-38	4.2	4.28e-224	-7.99
Serpina1e	100.347	10337.8	4.12455	4.32e-21	4.54	1.2e-155	-11.1
Serpina3f	4766.88	1068.31	5.36838	5.83e-178	9.51	1.79e-77	-7.39
Serpinb8	19.0032	327.816	1.15651	1.62e-05	3.39	9.13e-31	-7.45
Sh2b2	1425.64	1673.78	7.54875	2.47e-118	7.57	1.37e-31	-7.41
Shh	18.1507	11.0016	0.548577	1.24e-05	3.89	0.00867	-3.26
Shisa3	77.9019	87.6729	6.76231	2.05e-13	3.37	1.93e-08	-3.48
Shroom1	73.5064	78.7836	13.9672	7.96e-09	2.32	6.73e-07	-2.38
Sidt1	27.5731	112.706	4.61545	0.00176	2.32	8.65e-11	-4.28
Sis	10.404	14.5902	0	0.000185	4.14	0.000153	-5.04
Slc13a2	10.6052	3.95249	0	0.000174	4.16	0.0476	-3.16
Slc14a1	40.7064	4546.27	1.59149	9.88e-10	4.35	8.75e-82	-11.1
Slc15a3	228.777	313.425	37.0271	1.64e-26	2.63	9.7e-36	-3.04
Slc16a1	14517.1	7703.61	1158.22	5.29e-60	3.63	2.37e-31	-2.69
Slc1a2	35.4027	23.077	1.76444	4.66e-06	3.66	0.000348	-3.22
Slc1a3	77.1673	62.6343	6.77501	0.00425	2.82	6.23e-05	-2.97
Slc1a5	1724.71	3775.68	289.003	1.85e-54	2.59	4.11e-89	-3.67
Slc25a21	288.699	695.818	4.26443	6.42e-16	5.48	2.98e-12	-6.45
Slc28a2	36.4844	1796.56	5.75459	1.07e-05	2.5	1.42e-101	-8.06
Slc28a3	19.4334	40.0603	0.419282	2.48e-05	4.18	2.44e-06	-5.32
Slc2a5	18.2204	46.2247	1.17221	0.00141	3.17	9.58e-06	-4.58
Slc2a6	23.4388	10.4888	0.274288	4.7e-07	4.64	0.0074	-3.61
Slc30a2	86.8666	95.4068	2.48429	2.76e-19	4.77	6.62e-15	-4.9
Slc36a2	36.3695	28.1803	3.07653	9.62e-06	3.12	0.00425	-2.75
Slc37a1	404.105	348.912	4.19449	3.87e-56	6.44	4.63e-42	-6.24
Slc44a4	4.16926	16.4203	0	0.0438	2.59	0.000415	-4.87
Slc5a8	48.8368	108.238	0	1.86e-09	5.9	2.52e-06	-6.25
Slc5a9	65.453	84.8166	0.274288	9.82e-14	6.07	2.15e-12	-6.68
Slc7a11	443.702	175.342	15.3085	3.15e-67	4.76	2.42e-21	-3.4
Slc9a7	16.4637	20.2455	0.822865	9.17e-05	3.42	0.000451	-3.75
Slco5a1	207.555	561.812	25.0007	2.16e-28	3	2.97e-46	-4.38
Slfn8	513.494	419.519	65.4241	2.26e-47	2.97	3.5e-36	-2.64
Smr3a	114339	281357	375.92	5.01e-08	5.62	1.32e-07	-6.74
Snord123	12.3353	22.3392	0.274288	0.000105	3.84	1.27e-05	-4.85
Sostdc1	65.461	33.0436	0.419282	9.31e-14	6.05	1.05e-06	-5.26
Sowahb	14.3126	33.1529	1.25785	0.0122	2.7	1.62e-05	-4.25
Sox10	60.2721	151.47	3.5429	0.000968	3.26	0.00039	-4.31
Sparc	45844.1	95834.1	4102.79	1.66e-59	3.47	8.99e-75	-4.48
Spc25	308.102	336.721	56.1405	3.42e-19	2.44	1.1e-19	-2.52
Spdef	17.4367	34.9773	0.333644	5.68e-05	4.07	3.05e-05	-5.02
Speg	691.656	584.335	6.85685	8.09e-86	6.56	1.45e-64	-6.31
Spic	255.792	186.726	1.33457	4.32e-32	6.95	1.28e-23	-6.65
Spink3	12.7981	15.9397	0.838563	0.00567	2.97	0.0173	-3.22
Spint1	17.9577	37.8598	1.02721	0.000112	3.44	1.77e-05	-4.43
Spn	12.8345	63.4503	0.548577	0.000283	3.43	4.37e-11	-5.8
Srgn	18165.7	7806.78	100.586	1.24e-302	7.46	4e-298	-6.22
Srpx	74.1887	85.1502	5.84534	9.57e-12	3.56	2.43e-09	-3.71
Sstr1	23.8811	81.38	2.64666	0.000108	2.77	2.31e-13	-4.55
St6galnac2	220.329	3223.84	17.6741	3.9e-31	3.55	2.25e-229	-7.37
Stat4	83.0111	53.3166	3.9359	1.39e-17	4.35	3.99e-06	-3.56
Stra6	214.861	675.758	24.779	1.07e-25	3.06	2.52e-63	-4.67
Stxbp2	278.828	356.734	23.4216	1.12e-43	3.56	2.02e-50	-3.89
Sval2	8.69959	9.66083	0	0.00182	3.66	0.00322	-4.26
Sycn	82.1694	158.308	0	7.36e-06	4.98	0.0118	-3.95
Syt1	17.2184	344.295	0.419282	8.13e-05	3.98	1.63e-23	-8.56
Tank	1314.34	2070.28	261.42	1e-74	2.34	3.54e-103	-2.95
Tap1	3796.09	3489.48	564.777	7.07e-91	2.75	3.95e-68	-2.59
Tcerg1l	114.369	242.809	5.23397	2.46e-22	4.16	4.5e-30	-5.23
Tcf21	6.57827	8.46934	0.419282	0.0301	2.6	0.0154	-3.28
Tcf7	111.809	172.146	16.0322	7.18e-15	2.72	1.46e-16	-3.3
Tfap2a	36.2222	59.2587	0	1.61e-08	5.62	4.61e-08	-6.6
Tfap2b	28.6223	51.6556	0	5.08e-07	5.19	1.34e-07	-6.43
Tfap2c	4.72419	24.4727	0	0.0216	2.89	1.69e-05	-5.55
Tff2	17.1972	13.2627	0	1.56e-05	4.64	0.00152	-4.52
Tgtp2	860.828	1097.36	40.091	1.06e-114	4.41	7.26e-133	-4.72
Timp4	2772.26	2140.33	243.772	7.84e-60	3.49	2.3e-06	-2.96
Tjp3	89.9602	20.7617	3.23722	1.53e-19	4.54	0.00784	-2.4
Tle6	102.769	179.927	18.6874	6.35e-13	2.44	1.8e-22	-3.23
Tlr1	11.1361	58.4244	1.33457	0.012	2.47	6.44e-10	-4.95
Tlr4	672.763	394.02	22.0518	4.55e-86	4.89	6.55e-57	-4.1
Tmem150c	66.4521	95.2196	4.66422	4.9e-14	3.67	1.6e-13	-4.15
Tmem176a	25916.9	18415.6	631.356	1.24e-302	5.36	5.61e-209	-4.82
Tmem176b	24694.4	16045	571.298	1.24e-302	5.44	4e-298	-4.77
Tmem178	6.25351	70.8501	0.274288	0.0145	2.81	1.6e-11	-6.46
Tmem20	129.097	369.453	9.87403	6.77e-20	3.58	1.94e-36	-5.06
Tmem8	96.4527	65.4826	3.15158	1.29e-20	4.64	1.53e-11	-4.1
Tmprss13	72.5659	114.264	0.607932	1.13e-11	5.58	1.09e-06	-5.75
Tmprss2	47.6201	102.61	3.28088	1.27e-07	3.48	1.38e-09	-4.52
Tnfrsf19	23.6063	48.5907	3.10792	0.000366	2.65	1.71e-07	-3.73
Tnfrsf23	871.778	526.347	90.8042	1.4e-95	3.26	2.82e-38	-2.49
Tnfrsf26	546.24	2742.22	34.3749	4.72e-57	3.94	4.18e-212	-6.23
Tnfsf10	40471.9	46936	5423.44	1.88e-103	2.91	6.51e-157	-3.08
Tnfsf11	21.6844	26.0871	0	2.65e-07	5.19	2.41e-06	-5.84
Tnfsf15	22.8789	289.34	3.5183	0.000174	2.46	4.07e-33	-6.08
Tns3	4720.52	2132.9	386.764	2.84e-110	3.61	3.81e-31	-2.42
Tox2	3.47834	87.6832	0	0.0271	2.78	1.67e-11	-7.43
Tpd52l1	67.1821	153.533	8.73489	9.21e-06	2.74	6.97e-16	-3.94
Trat1	3.71321	6.44605	0	0.0279	2.77	0.00955	-3.86
Trim30a	9013.57	9370.66	972.33	7.3e-100	3.21	6.51e-77	-3.23
Trim30b	16.6435	20.4616	2.49999	0.00125	2.49	0.00325	-2.75
Trim30d	4155.71	3252.01	52.5591	1.24e-302	6.27	1.4e-235	-5.88
Trim34b	14.5847	13.9984	2.02814	0.00229	2.49	0.0179	-2.44
Trim6	1132.32	1860.81	55.1264	2.13e-79	4.31	3.38e-74	-4.98
Trim66	5.44141	6.14827	0.333644	0.0387	2.5	0.0385	-2.94
Trp63	88.9055	96.145	8.10411	5.54e-15	3.42	1.65e-11	-3.5
Try4	102.183	168.575	0	7.02e-11	6.39	0.000186	-5.38
Try5	34.2528	66.4639	0	2.52e-08	5.55	0.000477	-5.06
Tsku	1846.02	1100.03	208.542	1.02e-70	3.16	2.57e-25	-2.36
Tspan15	3896.84	4595.78	634.145	5.66e-97	2.63	4.89e-106	-2.83
Tspan7	57416.5	20432.4	2062.77	7.05e-165	4.79	9.17e-76	-3.27
Ttll7	95.1639	726.342	2.77428	1.88e-20	4.86	9.13e-57	-7.8
Tusc5	13.2354	118.985	1.66143	0.00229	2.6	5.17e-18	-5.76
Tyro3	165.989	45.1194	4.4268	2.24e-32	4.99	4.91e-06	-3.1
Ubd	1621.17	47172.5	5.40868	2.53e-111	8.21	2.31e-45	-11.8
Vamp5	4733.11	5327.36	608.737	5.16e-203	2.97	4.21e-142	-3.1
Vav1	15.4088	34.1026	1.27522	0.000308	3.03	6.12e-07	-4.22
Vcam1	11277.5	2605.83	80.0839	1.24e-302	7.09	1.55e-103	-4.95
Vgf	6.34075	8.74532	0.752925	0.0387	2.32	0.0197	-2.89
Vipr1	17.0259	14.4504	0	3.89e-06	4.82	0.000421	-4.84
Vpreb3	8.82228	39.5695	0.419282	0.00242	3.23	3.68e-08	-5.61
Was	4.0364	13.2928	0	0.0171	2.95	0.000257	-4.91
Wbscr28	18.3692	8.43954	0	1.48e-06	4.95	0.00404	-4.18
Wdr86	27.6065	38.6989	2.64499	5.73e-06	3.18	7.17e-06	-3.63
Wfdc12	4424.69	12146.3	15.8487	2.88e-11	6.22	9.06e-11	-7.49
Wfdc2	56.3689	58.3087	2.3393	7.65e-12	4.14	1.84e-05	-4.02
Xkr6	78.1668	89.3521	0.333644	2.58e-15	6.31	4.84e-13	-6.76
Xylt1	93.7627	73.2618	10.7368	7.1e-16	3.01	1.47e-07	-2.63
Zfp612	379.499	745.303	18.7051	1.94e-58	4.24	3.23e-64	-5.18

## Sheet: 5X-DEG LN-LEC+D-LEC
5X-DEGs in LN-LEC+D-LEC subset with average FPKM, p-adjusted, and log2 fold-change values in LN-LEC v D-LEC, LN-LEC v LN-BEC, and D-LEC v LN-BEC.
				LN-LEC v LN-BEC		D-LEC v LN-BEC
5X-DEG	Average FPKM LN-LEC	Average FPKM LN-BEC	Average FPKM D-LEC	P-adjusted	Log2 FC	P-adjusted	Log2 FC
Abcd2	143.253	24.4547	202.003	3.97e-10	2.52	2.82e-15	3.04
Ablim2	1065.1	74.6569	2864.37	8.42e-45	3.82	5.81e-27	5.14
Ang	391.011	52.0727	1840.21	3.22e-37	2.93	9.27e-105	5.15
Angptl3	143.248	5.90441	32.9251	4.55e-31	4.47	0.000205	2.38
Ankrd6	357.067	46.5666	1470.54	2.26e-39	2.96	5.86e-129	5
Anpep	335.849	64.502	713.714	9.23e-30	2.4	6.44e-44	3.47
Apba2	61.4078	6.2603	1756.61	6.98e-12	3.16	1.66e-119	8.03
Astl	9.13246	1.24015	21.3493	0.012	2.34	7.25e-05	3.67
Atp8a2	312.259	51.5423	625.728	4.87e-28	2.61	6.72e-49	3.61
B3gnt7	64.283	8.11673	57.1855	1.89e-08	2.85	6.56e-05	2.7
Bmp7	40.4492	1.0081	17.1654	5.36e-11	4.66	0.000768	3.57
Cacna2d3	53.7279	6.21492	55.7188	2.01e-09	2.97	8.73e-08	3.06
Cass4	47.8905	2.7719	41.4061	2.3e-10	3.77	3.05e-07	3.67
Ccdc136	112.076	13.5986	423.42	3.44e-17	2.99	3.15e-62	4.92
Ccdc141	650.375	78.1071	1153.68	9.04e-55	3.07	1.8e-65	3.89
Ccdc24	29.0692	4.67135	42.3044	7.57e-06	2.5	4.2e-07	3.06
Ccdc48	549.244	21.2541	1792.64	1.36e-69	4.68	1.66e-133	6.4
Cd5	312.438	23.4154	213.953	9.98e-51	3.74	5.45e-26	3.19
Cdkn2b	136.217	19.3471	191.901	2.04e-16	2.77	1.93e-24	3.29
Cfh	7200.57	923.332	5730.92	2.35e-08	2.83	0.000124	2.53
Clca1	41469.9	2017.82	18849.4	2.94e-34	4.28	1.51e-12	3.17
Col23a1	358.082	68.6789	8608.94	2.3e-17	2.38	4.64e-172	6.95
Col4a5	2610.41	202.722	1664.42	2.32e-106	3.71	2.09e-33	3.04
Col4a6	433.427	47.8767	542.601	1.19e-57	3.2	3.83e-47	3.51
Cp	15212	1032.18	41353.4	6.05e-24	3.8	3.2e-31	5.22
Cpne2	11390.3	1272.8	12344.5	3.54e-90	3.19	4.83e-58	3.29
Crybb1	18.4859	0.587934	14.2064	1.08e-05	3.82	0.00293	3.61
Ctdspl	3157.84	639.051	5525.98	1.74e-114	2.34	1.82e-174	3.14
Ctnnal1	5195.18	855.124	15580	4.97e-66	2.63	3.19e-149	4.2
Cxcr3	53.5784	1.24487	30.205	1.78e-13	4.81	1.28e-06	4.17
Cyfip2	1113.57	176.667	1363.3	4.66e-53	2.68	3.05e-82	2.97
Cyp8b1	122.286	24.5293	298.087	1.23e-12	2.32	1.43e-35	3.59
Dbc1	403.277	5.81182	248.331	2.42e-11	5.16	1.17e-05	4.65
Dennd2a	816.748	73.6925	3872.14	5.92e-62	3.48	1.45e-170	5.72
Dkk3	384.309	71.2788	775.414	1.48e-21	2.44	8.6e-57	3.46
Dleu7	19.1466	0	195.962	1.42e-06	4.72	1.23e-16	8.57
Dnaic1	600.103	33.2355	344.021	9.6e-16	3.98	6.31e-17	3.34
Dock7	1402.57	143.54	1215.51	1.88e-59	3.3	1.78e-38	3.09
Dtx1	1869.93	182.212	5502.77	1.34e-143	3.39	5.65e-287	4.93
Duox2	10.1728	1.24487	110.349	0.00821	2.43	2.62e-18	6.05
Duoxa2	67.1464	9.64993	516.896	6.03e-10	2.74	3.97e-59	5.71
Dusp2	1333.79	153.085	2473.66	7.13e-51	3.14	3.17e-68	4.02
Emid2	23.6646	1.95428	19.9753	2.43e-05	3.16	0.00255	3
Fam174b	5604.51	736.95	6783.53	2.52e-15	2.88	5.68e-13	3.16
Fam19a5	24.4946	2.96238	221.788	8.62e-05	2.78	7.53e-33	6.1
Fam65c	265.982	6.97443	95.0582	7.92e-43	5.13	1.68e-14	3.7
Fgf12	332.307	9.64757	723.448	6.09e-55	5.05	1.84e-92	6.22
Flnc	499.289	46.0642	1764.57	1.73e-40	3.44	2.99e-89	5.25
Flt4	16018.8	2366.06	81401	2.27e-123	2.79	3.1e-254	5.12
Fndc4	492.017	82.7064	513.142	3.07e-33	2.6	3.36e-32	2.65
Fndc8	192.287	32.7557	190.343	4.6e-23	2.56	7.09e-20	2.55
Foxc2	8446.28	695.487	14483.5	5.98e-19	3.51	1.62e-19	4.29
Foxl1	19.8401	1.89709	28.8421	7.15e-05	2.97	2.35e-05	3.61
Foxp2	6710.75	376.671	3782.84	4.19e-16	3.97	1.67e-07	3.21
Foxred2	778.25	75.7412	487.637	3.74e-08	3.15	0.000758	2.54
Fxyd6	20445	984.448	30948.5	3.96e-18	4.18	9.58e-17	4.8
Gjc2	286.29	27.0845	2147.26	6.93e-05	3	2.57e-11	5.73
Glis3	55.7121	2.31017	62.027	1.91e-14	4.32	2.33e-10	4.52
Gnaz	28.566	2.90282	34.7039	1.08e-06	3.05	4.28e-06	3.39
Gp1bb	8.47189	0.355885	23.9041	0.00442	3.02	4.93e-05	4.78
Gpm6a	15289.5	969.56	34449.1	2.81e-33	3.92	2.89e-38	5.08
Gpr162	29.2235	3.00867	42.9284	2.23e-05	2.91	7.91e-08	3.62
Gpr173	23.857	2.66133	39.5953	8.97e-05	2.84	1.67e-06	3.69
Gpr62	5.02589	0.355885	6.14758	0.0346	2.41	0.0313	3.02
Gpr97	3180.8	281.591	37568.3	5.57e-79	3.51	1.92e-276	7.06
Gprc5c	607.01	84.8449	1349.8	1.16e-46	2.86	1.57e-69	4
H19	154.872	24.7019	15637.8	8.12e-12	2.61	3.98e-58	8.96
H2-T3	21.055	1.65795	11.3829	5.95e-06	3.28	0.0279	2.44
H6pd	2585.12	331.177	1643.14	3.52e-75	2.99	4.01e-36	2.33
Heatr8	122.435	4.56314	194.884	9.32e-23	4.57	1.12e-26	5.31
Hfe2	31.6383	0.296329	18.5796	1.15e-09	5.04	0.000215	4.51
Hivep3	387.445	26.4798	309.933	1.17e-60	3.85	6.93e-40	3.54
Hoxd10	1317.11	84.0709	447.283	1.44e-86	3.99	1e-18	2.43
Hspa12a	1444.83	127.211	3702.39	1.26e-69	3.52	3.1e-124	4.87
Hyi	394.36	72.9845	588.155	6.34e-39	2.46	6.46e-42	3.03
Igsf10	900.095	138.429	708.649	3.03e-38	2.72	3.91e-18	2.37
Igsf3	2915.4	266.444	6252.7	1.81e-116	3.48	3.14e-192	4.57
Il18	35.8636	5.61753	49.6359	1.01e-06	2.55	3.92e-06	3.01
Il7	1161.49	168.917	4720.46	7.8e-41	2.8	1.72e-107	4.81
Itga9	7021.18	630.514	5012.18	2.77e-127	3.5	7.02e-82	3.01
Itih2	262.827	31.8759	363.509	1.09e-12	2.98	3.73e-06	3.33
Kbtbd11	3368.49	274.761	13690.4	5.72e-134	3.64	2.8e-228	5.65
Kif26b	68.329	5.63316	233.277	3.51e-08	3.36	1.9e-08	4.89
Kirrel	661.501	90.4496	474.005	2.49e-35	2.88	7.46e-18	2.4
Klhl4	6132.57	1245.53	14840.3	2.97e-46	2.33	1.63e-138	3.59
L3mbtl4	58.8552	0.948544	78.2377	5.51e-15	5.22	7.17e-14	5.85
Lbp	3777.48	355.869	11271.8	1.23e-46	3.41	7.01e-84	4.97
Lcn2	505.432	90.2537	14310.7	1.49e-21	2.5	2.51e-262	7.31
Leprel2	1607.46	208.119	2543.3	2.21e-58	2.97	1.27e-69	3.62
Lif	38.0162	3.73226	54.2506	1.59e-06	3.07	1.2e-08	3.69
Lingo1	329.929	6.57461	248.527	1.35e-53	5.56	1.56e-33	5.19
Loxl2	905.617	85.9276	1914.53	1.71e-114	3.43	7.44e-98	4.48
Loxl3	383.998	51.0542	425.918	3.52e-31	2.93	8.67e-24	3.07
Lrp12	2271.75	431.191	2936.94	5.51e-83	2.43	5.12e-85	2.79
Lrrn4cl	366.975	27.7053	1796.1	2.3e-38	3.7	1.67e-104	5.99
Lyl1	646.01	122.363	1041.76	6.32e-42	2.43	4.31e-48	3.1
Lypd6	161.562	25.1754	453.922	1.67e-12	2.64	2.91e-25	4.13
Lyve1	60105.4	1730.27	165926	3.95e-13	4.64	1.85e-15	6.11
Maf	34227.5	1173.16	38877	7.89e-30	4.71	2.84e-22	4.92
Med12l	103.651	20.4285	114.549	7.85e-09	2.32	2.04e-07	2.47
Mical2	1358.71	279.075	3928.94	6.08e-79	2.32	3.06e-114	3.83
Mmrn1	33294.3	1164.3	205712	8.24e-15	4.49	1.84e-24	7.03
Mrc1	6470.02	126.889	8701.85	2.06e-18	5.22	2.69e-16	5.75
Myo18b	13.3786	0	183.887	1e-05	4.4	2e-16	8.51
Myo7a	4533.63	403.722	7126.61	3.91e-73	3.5	4.66e-79	4.15
Nat8l	170.51	30.0018	680.172	1.34e-21	2.52	4.49e-85	4.52
Necab1	25.2385	3.83956	48.1416	0.000148	2.5	1.88e-07	3.5
Neto1	14.7466	0.8819	10.1009	0.000473	3.16	0.0211	2.83
Nfatc2	961.164	103.596	659.137	3.2e-44	3.22	5.37e-21	2.68
Nol3	66.6444	5.5736	35.0931	4.29e-11	3.42	0.0015	2.51
Npl	1076.02	25.1217	309.992	2.3e-17	5	5e-14	3.57
Nppc	16.8492	0.71177	217.467	3.61e-05	3.65	8.38e-20	7.51
Npy	5.30194	0.293967	114.697	0.0287	2.5	3.35e-15	7.23
Nr2f2	20656	4187.02	28605.1	6.82e-112	2.34	6.59e-125	2.8
Nrap	107.909	17.787	172.615	6.64e-18	2.59	1.9e-23	3.26
Nrcam	581.647	18.2484	1797.04	1.62e-12	4.54	3.39e-16	6.17
Nrxn2	574.932	14.9891	447.617	3.86e-67	5.22	4.78e-43	4.88
Nts	2671.24	284.704	18613.2	7.64e-12	3.12	5.97e-26	5.83
Odz3	910.539	77.991	741.981	2.04e-15	3.43	6.05e-22	3.24
Olfm1	1875.83	299.169	5151.4	3.56e-95	2.68	1.36e-187	4.12
Onecut2	7.10182	0	5.35268	0.0014	3.5	0.0343	3.35
Oxgr1	10.3798	0.71177	10.992	0.00142	3.02	0.00715	3.27
Pard3	2522.15	205.894	2384.9	2.04e-13	3.47	2.48e-09	3.42
Pard6g	3115.4	176.679	19273.9	1.04e-24	4.04	1.16e-45	6.61
Pdpn	18630.6	632.439	63206.8	8.57e-17	4.57	1.64e-21	6.3
Phldb3	75.8165	10.122	108.96	9.39e-10	2.8	2.7e-10	3.33
Pld5	3043.87	152.662	1990.26	4.19e-27	4.21	2.94e-55	3.71
Plekha4	775.606	39.415	1016.45	2.28e-97	4.31	5.87e-77	4.69
Popdc2	1044.43	43.5992	276.091	8.93e-18	4.35	2.64e-09	2.64
Ppfia3	3.28262	0	5.8419	0.0374	2.52	0.0278	3.45
Prdm8	26.6843	2.90519	192.841	0.000325	2.79	3.63e-29	5.9
Prelp	4739.63	729.627	28978.5	1.99e-54	2.72	2.1e-172	5.32
Prkcq	655.632	67.9867	3432.22	6.13e-47	3.29	1.58e-149	5.67
Prkcz	702.249	82.3443	2287.31	6.12e-36	3.1	8.1e-88	4.8
Prox1	8004.53	227.778	7925.39	3.61e-44	5.02	6.78e-29	5.02
Psd2	52.8688	2.37208	31.1602	3.08e-12	4.18	3.42e-05	3.48
Psg17	91.548	9.05491	131.463	1.28e-17	3.3	1.75e-20	3.83
Psg19	5.93365	0	4.98429	0.00315	3.3	0.0446	3.22
Ptn	788.402	61.664	389.13	1.31e-58	3.68	4.99e-21	2.67
Ptprf	1990.93	235.274	2344.21	4.5e-37	3.09	2.01e-33	3.32
Ptprv	31.2811	5.39166	1161.79	0.000359	2.37	9.42e-26	7.31
Ptx3	1382.74	28.3326	3902.65	4.53e-14	5.02	8.57e-15	6.48
Rbms3	3235.71	501.528	3621.63	2.43e-53	2.71	3.31e-45	2.87
Reep1	2629.48	151.863	2681.2	1.55e-66	4.11	1.67e-48	4.13
Reln	2994.44	77.9597	85959.9	2.42e-16	4.86	6.07e-38	9.41
Rhou	2173.81	324.683	2013.96	3.7e-37	2.76	4.23e-26	2.64
Rhpn1	50.1687	4.79283	104.648	1.2e-10	3.25	1.17e-17	4.35
Rnase10	52.3827	8.29448	51.2598	2.27e-07	2.59	0.000121	2.54
Rnase4	3001.97	435.289	11839.3	6.12e-13	2.74	4.15e-25	4.67
Rnf182	95.6504	5.08534	240.735	5.01e-15	3.97	2.5e-34	5.4
Rnf39	141.663	26.6302	488.345	2.04e-16	2.43	5.48e-52	4.2
Rtkn	1017.95	112.173	4639.37	1.02e-33	3.18	9.37e-30	5.26
Scin	1130.83	14.6777	110.232	1.88e-24	5.81	1.06e-05	2.82
Scn1a	33.2247	5.63316	50.8438	0.000943	2.34	3.82e-05	3.03
Scn3a	746.272	67.4341	16842.8	1.5e-35	3.45	9.08e-229	7.94
Scn5a	561.08	24.7676	1381.07	3.03e-14	4.22	4.26e-17	5.52
Sema3a	7444.38	204.4	3947.38	8.21e-20	4.87	9.67e-10	4.07
Sema3d	21414.5	599.876	12957	4.82e-17	4.79	4.48e-09	4.18
Serpina3h	320.898	18.7724	222.756	1.56e-34	4.05	4.44e-22	3.55
Sfmbt2	339.411	29.4862	268.033	1.88e-39	3.51	2.18e-16	3.16
Slc16a12	3206.75	94.9839	3349.82	2.73e-15	4.69	5.9e-11	4.82
Slc19a3	74.4283	7.27312	205.19	1.1e-16	3.28	6.55e-36	4.77
Slc22a4	367.097	39.6285	285.196	2.71e-42	3.21	5.02e-20	2.85
Slc38a4	11112.4	290.136	6682.23	2.45e-18	4.9	2.09e-09	4.27
Slc39a12	20.4107	2.0162	33.4304	8.34e-05	2.96	4.55e-06	3.79
Slc39a4	2247.11	182.882	913.695	2.12e-58	3.63	3.59e-16	2.33
Slc45a3	4161.23	175.443	23002.9	3.57e-12	4.21	1.23e-19	6.58
Slc6a9	1305.37	222.872	3089.51	1.33e-10	2.51	3.41e-46	3.79
Slc8a1	799.53	162.25	2465.31	1.46e-44	2.33	6.2e-111	3.94
Slc9a9	4977.32	137.055	1658.66	8.02e-22	4.9	2.6e-08	3.46
Smarca1	132.579	20.029	191.546	2.19e-21	2.71	1.97e-25	3.23
Smtnl2	825.223	164.691	1514.68	2.54e-28	2.35	2.58e-48	3.21
Sorcs1	440.37	29.3113	203.415	1.12e-52	3.9	1.4e-13	2.78
Speer4e	7.04664	0.296329	114.664	0.00477	2.97	2.92e-15	7.22
Spef2	94.7981	4.32019	35.0532	3.22e-20	4.24	0.000171	2.85
Spsb1	1655.59	264.598	5846.89	3.02e-94	2.68	1.53e-168	4.48
Stab1	12700.3	2612.12	33636.9	1.5e-117	2.32	2.85e-225	3.71
Ston2	3854.46	194.026	15820.7	6.3e-10	3.93	9.18e-15	5.9
Sulf2	1596.64	153.9	1810.09	1.72e-10	3.22	3.33e-08	3.42
Susd4	44.0568	8.15738	555.84	5.22e-06	2.33	9.16e-78	6.04
Tbx1	2997.69	84.5414	2926.54	3.79e-15	4.73	1.46e-11	4.82
Tgfb3	1184	121.679	2572.15	1.91e-15	3.21	6.99e-17	4.29
Thsd4	3547.27	129.803	1181.66	3.68e-39	4.67	1.69e-24	3.18
Thy1	5588.7	269.374	38038.9	8.22e-20	4.2	6.42e-40	6.92
Ticam2	13.5091	1.53412	21.8945	0.00206	2.63	0.000125	3.45
Tmem117	311.381	19.6888	138.598	5.93e-33	3.92	6.2e-10	2.78
Tmem200c	27.8073	0.71177	203.634	5.5e-08	4.39	3.3e-22	7.54
Tmem74	11.7362	1.65795	19.4835	0.00394	2.44	0.000611	3.24
Tnfaip8l3	252.637	7.21738	1476.33	3.65e-47	5.07	1.13e-108	7.64
Ttyh2	4102.46	673.206	5987.73	7.96e-55	2.63	3.32e-48	3.16
Tub	3244.05	206.602	1818.9	2.4e-105	3.99	4.42e-48	3.15
Ube2ql1	306.127	16.3952	697.143	1.26e-09	3.86	6.16e-10	5
Wdr17	19.8128	0	32.0255	2.57e-07	4.91	2.34e-07	6.22
Wdr95	13.5858	0.948544	13.0023	0.000245	3.13	0.00501	3.19
Wipf3	2363.03	209.429	11788.3	1.11e-55	3.5	1.77e-137	5.81
Wnt2	182.565	13.5661	324.155	4.66e-06	3.33	1.32e-07	4.25

## Sheet: 5X-DEG D-LEC+LN-BEC
5X-DEGs in D-LEC+LN-BEC subset with average FPKM, p-adjusted, and log2 fold-change values in LN-LEC v D-LEC, LN-LEC v LN-BEC, and D-LEC v LN-BEC.
				LN-LEC v D-LEC		LN-LEC v LN-BEC
5X-DEG	Average FPKM LN-LEC	Average FPKM LN-BEC	Average FPKM D-LEC	P-adjusted	Log2 FC	P-adjusted	Log2 FC
Abca8b	11.5771	94.5566	108.811	1.17e-13	-3.08	7.67e-11	-2.84
Adora2a	73.3076	488.148	898.206	3.06e-60	-3.53	1.96e-23	-2.63
Afap1l2	95.2042	737.821	772.158	1.4e-47	-2.99	3.29e-65	-2.91
Aqp1	642.043	15123.1	6154.84	5.13e-105	-3.22	4.32e-168	-4.48
B3gnt5	12.669	155.548	216.441	4.02e-36	-3.97	2.54e-25	-3.47
Cabp1	1.52406	23.4631	13.0096	0.00676	-2.44	4.31e-05	-3.17
Capg	238.996	2220.83	1419.01	1.34e-55	-2.54	2.58e-82	-3.15
Ccdc109b	44.2889	310.977	365.124	1.43e-40	-2.97	2.44e-33	-2.71
Ccl4	0	11.2049	4.4582	0.0169	-3.01	0.00212	-3.5
Cd109	12.0812	771.928	2370.17	8.66e-231	-7.37	4.52e-94	-5.73
Cd2	12.707	123.837	1802.29	1.98e-169	-6.96	3.5e-18	-3.1
Cd200	3399.36	56675.1	25954.1	5.83e-96	-2.9	4.22e-183	-4
Cdh3	1.58555	25.2179	15.6112	0.00115	-2.84	1.1e-05	-3.42
Ch25h	73.9509	1659.02	966.236	4.57e-47	-3.62	1.27e-72	-4.36
Ckb	54.0899	518.52	991.448	1.39e-68	-4.11	1.51e-39	-3.15
Cldn15	34.9639	588.287	197.418	7.22e-11	-2.4	7.15e-37	-3.92
Cmya5	1.93079	134.638	31.783	1.06e-07	-3.63	3.72e-26	-5.62
Cobl	11.9672	364.534	210.425	4.33e-31	-3.94	2.65e-52	-4.69
Col8a1	32.1424	1210.22	350.42	8.59e-41	-3.37	1.13e-127	-5.12
Csrp3	0	5.9725	10.4332	0.00019	-4.24	0.0237	-2.73
Ctla2a	810.083	28242.4	12669.6	6.98e-269	-3.94	4.43e-299	-5.06
Cttnbp2	78.6624	1031.98	487.864	4.16e-33	-2.6	1.2e-74	-3.65
Dnajb13	2.31715	22.4485	63.9153	4.4e-13	-4.23	0.00405	-2.56
Dysf	336.535	3898.78	5184.78	4.23e-88	-3.89	2.73e-80	-3.46
Ebf1	77.8478	1259.35	507.459	3.05e-42	-2.66	2.66e-108	-3.94
Emcn	640.365	17482	6329.5	2.43e-64	-3.26	2.65e-161	-4.69
Emp1	571.786	4413.73	21424.1	1.97e-56	-5.1	9.06e-38	-2.87
Enpp3	30.3113	488.065	2504.89	3.82e-47	-6.09	7.37e-32	-3.82
Enpp6	2.0473	114.374	18.9989	0.00189	-2.74	2.62e-19	-5.29
Fam13c	3.49601	503.752	25.8796	4.46e-05	-2.57	3.83e-63	-6.72
Fam198b	611.11	22659.7	4873.05	3.58e-45	-2.95	9.55e-222	-5.14
Fam19a3	7.67243	59.3579	42.17	1.4e-05	-2.37	2.57e-08	-2.81
Fam20a	43.8954	254.751	769.008	9.08e-71	-4.02	1.1e-16	-2.41
Fam38b	848.679	7120.06	24128.4	1.84e-299	-4.8	1.63e-101	-3.02
Fam55d	105.637	2223.86	673.823	1.25e-50	-2.62	2.02e-179	-4.31
Fam65b	108.336	1429.66	1122.71	2.3e-69	-3.32	5.29e-118	-3.64
Fam84a	50.0183	290.358	419.403	1.54e-06	-2.85	1.23e-08	-2.4
Fbln2	752.294	4515.77	8076.27	1.48e-125	-3.39	2.37e-65	-2.53
Filip1	125.038	1152.3	723.895	1.59e-46	-2.51	1.23e-60	-3.14
Fmo2	86.1675	1503.5	1027.87	5.98e-14	-3.42	5.21e-66	-4.02
Gipc2	1.64824	83.719	47.2395	5.26e-12	-4.27	1.76e-19	-5
Gpihbp1	461.5	8812.52	10941.1	1.49e-151	-4.52	6.69e-31	-4.09
Gpr30	1.06865	68.1047	139.764	1.65e-25	-6.47	8.25e-17	-5.35
Gprc5a	4.5545	28.8699	53.5008	3.16e-10	-3.25	0.000162	-2.33
Grb14	2.92658	48.8521	62.2164	1.96e-13	-4.18	2.14e-11	-3.79
Hecw2	41.2597	2293.48	616.355	5.93e-93	-3.84	9.61e-271	-5.7
Hey1	280.696	5108.47	6525.05	6.77e-266	-4.5	7.43e-257	-4.12
Hrc	0.558743	7.51607	21.7762	1.43e-06	-4.32	0.0276	-2.48
Hspb8	76.7336	585.954	2549.35	2.53e-32	-4.86	2.82e-21	-2.81
Id1	218.195	14358.6	5396.83	7.88e-139	-4.57	1.95e-225	-5.94
Igfbp1	0	13.4848	10.4277	9.62e-05	-4.35	1.93e-05	-4.39
Igfbp3	278.848	13024.2	5221.01	7.8e-105	-4.17	2.66e-170	-5.45
Il6	2.00296	80.3971	32.0602	3.42e-08	-3.56	3.42e-18	-4.79
Inhbb	28.9418	1240.08	451.12	3.79e-52	-3.85	5.42e-84	-5.25
Kcnc4	0	3.19443	5.80336	0.00352	-3.52	0.0498	-2.42
Klf12	22.8448	197.108	722.13	3.51e-117	-4.91	4.19e-27	-3
Klf8	7.01235	114.282	65.6246	8.86e-13	-3.05	1.05e-22	-3.81
Lrrc36	3.09575	77.0704	37.9899	2.34e-08	-3.38	1.22e-14	-4.29
Mlf1	14.5956	108.819	84.1412	1.12e-10	-2.47	1.73e-16	-2.83
Mtap6	24.7189	337.163	480.659	2.32e-14	-4.03	6.01e-29	-3.63
Myl1	0.993303	10.6934	126.976	3.78e-23	-6.32	0.01	-2.57
Nov	117.843	1654.82	3659.38	1.66e-230	-4.9	1.14e-124	-3.73
Nsg2	3.44083	71.3844	230.723	5.05e-10	-5.1	8.71e-09	-3.77
Pcdh20	0.748113	65.8812	66.3571	6.9e-16	-5.69	3.99e-15	-5.5
Pcp4l1	372.324	2300.51	6752.21	5.83e-116	-4.13	2.57e-50	-2.56
Plcl1	13.3749	148.558	205.811	4.86e-34	-3.89	7.37e-23	-3.38
Pou2f3	0	5.31503	5.57105	0.00632	-3.35	0.0294	-2.64
Ppbp	2.32799	21.1539	55.4416	6.12e-09	-4.01	0.00118	-2.61
Prex2	1020.38	6968.6	8298.28	7.96e-114	-3	2.33e-105	-2.72
Ramp3	38.5309	1059.2	354.291	8.87e-23	-3.11	6.21e-104	-4.66
Rbp7	70.2714	4532.46	946.265	5.69e-40	-3.64	5.58e-40	-5.7
Rundc3b	5.11891	150.309	30.1528	0.000147	-2.37	7.39e-32	-4.65
Sema6d	248.059	3551.54	2452.39	2.42e-91	-3.27	8.73e-114	-3.77
Sgca	0.32054	18.6008	5.37896	0.031	-2.63	4.61e-06	-4.29
Slc4a11	25.9123	193.899	673.898	1.54e-55	-4.64	1.41e-24	-2.85
Sox6	4.80589	101.473	56.5081	9.53e-08	-3.18	5.38e-15	-3.96
Spry4	82.5535	1517.83	773.474	1.53e-56	-3.18	3.8e-159	-4.12
Stmn2	95.7481	1025.09	7213.69	1.24e-302	-6.17	4.96e-60	-3.34
Tacc2	43.2537	434.356	987.806	1.49e-17	-4.26	7.09e-19	-3.16
Tat	0	9.52846	10.2759	0.000207	-4.22	0.000272	-3.92
Tcf23	0.32054	31.2596	11.8339	0.000259	-3.83	9.61e-08	-4.85
Tmsb4x	18049.9	134391	125668	1.75e-150	-2.78	2.1e-191	-2.85
Tnfrsf11b	4.81616	92.0044	71.1236	3.94e-12	-3.61	8.6e-18	-3.96
Tspan8	11.0975	468.905	65.6576	4.71e-05	-2.37	1.65e-16	-4.89
Zfp831	2.88224	33.6527	41.3221	3.4e-09	-3.54	6.53e-07	-3.17
