# Supplementary material for: Comparative Transcriptomic Analysis Identifies a Range of Immunologically Related Functional Elaborations of Lymph Node Associated Lymphatic and Blood Endothelial Cells
Source: Front Immunol. 2019 Apr 16;10:816. doi: 10.3389/fimmu.2019.00816 (PMC6478037; doi:10.3389/fimmu.2019.00816)
Supplement: Supplementary file 3 [file Table_3.xlsx]

## Sheet: LN-LEC only
	Table S3: Enriched GO terms in LN-LEC 5X-DEG
	Biological Process
	GO Term	Description	P-adj value	Enrichment Score	B (number of GO members)	b (number of 5X-DEG overlap with GO members)	5X-DEG
ECM Components & Cell-Adhesion Molecules (Figure 2)	GO:0007157	heterophilic cell-cell adhesion via plasma membrane cell adhesion molecules	9.48e-06	6.35	47	9	[Tenm4 - teneurin transmembrane protein 4, Tenm2 - teneurin transmembrane protein 2, Ptprd - protein tyrosine phosphatase, receptor type, d, Nrxn1 - neurexin i, Igsf21 - immunoglobulin superfamily, member 21, Alcam - activated leukocyte cell adhesion molecule, Cdh4 - cadherin 4, Il1rapl1 - interleukin 1 receptor accessory protein-like 1, Cd6 - cd6 antigen]
	GO:0098742	cell-cell adhesion via plasma-membrane adhesion molecules	2.66e-08	4.42	150	20	[Pcdh15 - protocadherin 15, Ptprd - protein tyrosine phosphatase, receptor type, d, Pcdh8 - protocadherin 8, Igsf21 - immunoglobulin superfamily, member 21, Cldn2 - claudin 2, Lphn3 - latrophilin 3, Cdhr5 - cadherin-related family member 5, Tenm4 - teneurin transmembrane protein 4, Flrt3 - fibronectin leucine rich transmembrane protein 3, Tenm2 - teneurin transmembrane protein 2, Nrxn1 - neurexin…
	GO:0007160	cell-matrix adhesion	6.67e-05	4.15	88	11	[Fn1 - fibronectin 1, Muc4 - mucin 4, Sirpa - signal-regulatory protein alpha, Itga2b - integrin alpha 2b, Tiam1 - t cell lymphoma invasion and metastasis 1, Hpse - heparanase, Adam9 - a disintegrin and metallopeptidase domain 9 (meltrin gamma), Epdr1 - ependymin related protein 1 (zebrafish), Emilin1 - elastin microfibril interfacer 1, Frem1 - fras1 related extracellular matrix protein 1, Eda - …
	GO:0031589	cell-substrate adhesion	3.52e-06	3.9	136	16	[Fn1 - fibronectin 1, Sfrp1 - secreted frizzled-related protein 1, Itga2b - integrin alpha 2b, Sirpa - signal-regulatory protein alpha, Tiam1 - t cell lymphoma invasion and metastasis 1, Fzd7 - frizzled homolog 7 (drosophila), Hpse - heparanase, Adam9 - a disintegrin and metallopeptidase domain 9 (meltrin gamma), Frem1 - fras1 related extracellular matrix protein 1, Epdr1 - ependymin related prot…
	GO:0030198	extracellular matrix organization	1.65e-06	3.32	210	21	[Col14a1 - collagen, type xiv, alpha 1, Fn1 - fibronectin 1, Cyp1b1 - cytochrome p450, family 1, subfamily b, polypeptide 1, Colq - collagen-like tail subunit (single strand of homotrimer) of asymmetric acetylcholinesterase, Lamc2 - laminin, gamma 2, Myo1e - myosin ie, Mmp9 - matrix metallopeptidase 9, Col27a1 - collagen, type xxvii, alpha 1, Marco - macrophage receptor with collagenous structure…
	GO:0022610	biological adhesion	1.71e-18	3.21	744	72	[Cldn11 - claudin 11, Fn1 - fibronectin 1, Nlgn2 - neuroligin 2, Bcan - brevican, Ptk2b - ptk2 protein tyrosine kinase 2 beta, Cldn2 - claudin 2, Postn - periostin, osteoblast specific factor, Ache - acetylcholinesterase, Nrxn1 - neurexin i, Ajuba - ajuba lim protein, Sdk1 - sidekick homolog 1 (chicken), Alcam - activated leukocyte cell adhesion molecule, Gp1ba - glycoprotein 1b, alpha polypeptid…
	GO:0007155	cell adhesion	3.1e-18	3.21	734	71	[Cldn11 - claudin 11, Fn1 - fibronectin 1, Nlgn2 - neuroligin 2, Bcan - brevican, Ptk2b - ptk2 protein tyrosine kinase 2 beta, Cldn2 - claudin 2, Postn - periostin, osteoblast specific factor, Ache - acetylcholinesterase, Nrxn1 - neurexin i, Ajuba - ajuba lim protein, Sdk1 - sidekick homolog 1 (chicken), Alcam - activated leukocyte cell adhesion molecule, Gp1ba - glycoprotein 1b, alpha polypeptid…
	GO:0043062	extracellular structure organization	1.39e-06	3.14	243	23	[Col14a1 - collagen, type xiv, alpha 1, Soat2 - sterol o-acyltransferase 2, Fn1 - fibronectin 1, Cyp1b1 - cytochrome p450, family 1, subfamily b, polypeptide 1, Colq - collagen-like tail subunit (single strand of homotrimer) of asymmetric acetylcholinesterase, Lamc2 - laminin, gamma 2, Pla2g5 - phospholipase a2, group v, Myo1e - myosin ie, Mmp9 - matrix metallopeptidase 9, Col27a1 - collagen, typ…
	GO:0098609	cell-cell adhesion	3.54e-08	3.07	335	31	[Pcdh8 - protocadherin 8, Itga2b - integrin alpha 2b, Nlgn2 - neuroligin 2, Cldn2 - claudin 2, Fermt3 - fermitin family homolog 3 (drosophila), Flrt3 - fibronectin leucine rich transmembrane protein 3, Nrxn1 - neurexin i, Ajuba - ajuba lim protein, Astn1 - astrotactin 1, Alcam - activated leukocyte cell adhesion molecule, Gp1ba - glycoprotein 1b, alpha polypeptide, Il1rapl1 - interleukin 1 recept…
	GO:0010811	positive regulation of cell-substrate adhesion	0.00095	3.07	119	11	[Unc13d - unc-13 homolog d (c. elegans), Edil3 - egf-like repeats and discoidin i-like domains 3, Fn1 - fibronectin 1, Has2 - hyaluronan synthase 2, Vwc2 - von willebrand factor c domain containing 2, Vegfa - vascular endothelial growth factor a, Ptk2b - ptk2 protein tyrosine kinase 2 beta, Smoc1 - sparc related modular calcium binding 1, Csf1 - colony stimulating factor 1 (macrophage), Emilin1 -…
	GO:0010810	regulation of cell-substrate adhesion	2.88e-05	3.05	196	18	[Edil3 - egf-like repeats and discoidin i-like domains 3, Fn1 - fibronectin 1, Mfi2 - antigen p97 (melanoma associated) identified by monoclonal antibodies 133.2 and 96.5, Vwc2 - von willebrand factor c domain containing 2, Vegfa - vascular endothelial growth factor a, Fzd7 - frizzled homolog 7 (drosophila), Ptk2b - ptk2 protein tyrosine kinase 2 beta, Postn - periostin, osteoblast specific facto…
	GO:0030155	regulation of cell adhesion	1.53e-07	2.33	642	45	[Gpam - glycerol-3-phosphate acyltransferase, mitochondrial, Ptger4 - prostaglandin e receptor 4 (subtype ep4), Fn1 - fibronectin 1, Edil3 - egf-like repeats and discoidin i-like domains 3, Aif1 - allograft inflammatory factor 1, Vwc2 - von willebrand factor c domain containing 2, Vegfa - vascular endothelial growth factor a, Pawr - prkc, apoptosis, wt1, regulator, Ptk2b - ptk2 protein tyrosine k…
Cytokine & Cytokine Receptors (Figure 4 & 5)	GO:0071623	negative regulation of granulocyte chemotaxis	0.000907	33.18	2	2	[Slit2 - slit homolog 2 (drosophila), C5ar2 - complement component 5a receptor 2]
	GO:0090024	negative regulation of neutrophil chemotaxis	0.000907	33.18	2	2	[Slit2 - slit homolog 2 (drosophila), C5ar2 - complement component 5a receptor 2]
	GO:0090197	positive regulation of chemokine secretion	1.63e-05	13.83	12	5	[Pycard - pyd and card domain containing, Il33 - interleukin 33, Hc - hemolytic complement, Il1rl1 - interleukin 1 receptor-like 1, Postn - periostin, osteoblast specific factor]
	GO:0006957	complement activation, alternative pathway	0.000148	13.27	10	4	[C3 - complement component 3, Hc - hemolytic complement, C8g - complement component 8, gamma polypeptide, Cfp - complement factor properdin]
	GO:0090196	regulation of chemokine secretion	2.58e-05	12.76	13	5	[Pycard - pyd and card domain containing, Il33 - interleukin 33, Hc - hemolytic complement, Il1rl1 - interleukin 1 receptor-like 1, Postn - periostin, osteoblast specific factor]
	GO:0030449	regulation of complement activation	0.00047	10.21	13	4	[C3 - complement component 3, Cd59a - cd59a antigen, A2m - alpha-2-macroglobulin, Cd55 - cd55 antigen]
	GO:0030225	macrophage differentiation	0.000643	9.48	14	4	[Cebpa - ccaat/enhancer binding protein (c/ebp), alpha, Spib - spi-b transcription factor (spi-1/pu.1 related), Vegfa - vascular endothelial growth factor a, Csf1 - colony stimulating factor 1 (macrophage)]
	GO:2000257	regulation of protein activation cascade	0.000643	9.48	14	4	[C3 - complement component 3, Cd59a - cd59a antigen, A2m - alpha-2-macroglobulin, Cd55 - cd55 antigen]
	GO:0002689	negative regulation of leukocyte chemotaxis	0.000856	8.85	15	4	[Hc - hemolytic complement, Slit2 - slit homolog 2 (drosophila), Ccl12 - chemokine (c-c motif) ligand 12, C5ar2 - complement component 5a receptor 2]
	GO:0010575	positive regulation of vascular endothelial growth factor production	6.19e-05	8.3	24	6	[C3 - complement component 3, Cyp1b1 - cytochrome p450, family 1, subfamily b, polypeptide 1, C5ar1 - complement component 5a receptor 1, Hc - hemolytic complement, Gata4 - gata binding protein 4, Hpse - heparanase]
	GO:0006958	complement activation, classical pathway	1.91e-05	8.01	29	7	[C3 - complement component 3, Daf2 - decay accelerating factor 2, Cfi - complement component factor i, Cd55 - cd55 antigen, Hc - hemolytic complement, C2 - complement component 2 (within h-2s), C8g - complement component 8, gamma polypeptide]
	GO:0006956	complement activation	3.55e-06	7.11	42	9	[C3 - complement component 3, Daf2 - decay accelerating factor 2, Cfi - complement component factor i, Cd55 - cd55 antigen, Hc - hemolytic complement, C2 - complement component 2 (within h-2s), C8g - complement component 8, gamma polypeptide, Cfp - complement factor properdin, Colec11 - collectin sub-family member 11]
	GO:0002686	negative regulation of leukocyte migration	4.71e-05	7.04	33	7	[Ptger4 - prostaglandin e receptor 4 (subtype ep4), Il33 - interleukin 33, Slit2 - slit homolog 2 (drosophila), Hc - hemolytic complement, Ccl12 - chemokine (c-c motif) ligand 12, C5ar2 - complement component 5a receptor 2, Emilin1 - elastin microfibril interfacer 1]
	GO:0010574	regulation of vascular endothelial growth factor production	0.000283	6.42	31	6	[C3 - complement component 3, C5ar1 - complement component 5a receptor 1, Cyp1b1 - cytochrome p450, family 1, subfamily b, polypeptide 1, Hc - hemolytic complement, Gata4 - gata binding protein 4, Hpse - heparanase]
	GO:0001773	myeloid dendritic cell activation	0.000951	6.38	26	5	[Notch2 - notch 2, Pycard - pyd and card domain containing, Csf2 - colony stimulating factor 2 (granulocyte-macrophage), Relb - avian reticuloendotheliosis viral (v-rel) oncogene related b, Batf2 - basic leucine zipper transcription factor, atf-like 2]
	GO:0048247	lymphocyte chemotaxis	0.000102	6.28	37	7	[Ccl9 - chemokine (c-c motif) ligand 9, Ccl20 - chemokine (c-c motif) ligand 20, Cxcl10 - chemokine (c-x-c motif) ligand 10, Ccl24 - chemokine (c-c motif) ligand 24, Ccl12 - chemokine (c-c motif) ligand 12, Cxcl16 - chemokine (c-x-c motif) ligand 16, Cyp7b1 - cytochrome p450, family 7, subfamily b, polypeptide 1]
	GO:0002920	regulation of humoral immune response	0.000405	6.03	33	6	[C3 - complement component 3, Cd59a - cd59a antigen, A2m - alpha-2-macroglobulin, Fcgr2b - fc receptor, igg, low affinity iib, Cd55 - cd55 antigen, Tnf - tumor necrosis factor]
	GO:0072376	protein activation cascade	5.87e-06	5.93	56	10	[C3 - complement component 3, Cfi - complement component factor i, Daf2 - decay accelerating factor 2, Cd55 - cd55 antigen, C2 - complement component 2 (within h-2s), Hc - hemolytic complement, C8g - complement component 8, gamma polypeptide, Cfp - complement factor properdin, Colec11 - collectin sub-family member 11, F8 - coagulation factor viii]
	GO:0072676	lymphocyte migration	0.000625	4.74	49	7	[Ccl9 - chemokine (c-c motif) ligand 9, Ccl20 - chemokine (c-c motif) ligand 20, Cxcl10 - chemokine (c-x-c motif) ligand 10, Ccl24 - chemokine (c-c motif) ligand 24, Ccl12 - chemokine (c-c motif) ligand 12, Cxcl16 - chemokine (c-x-c motif) ligand 16, Cyp7b1 - cytochrome p450, family 7, subfamily b, polypeptide 1]
	GO:0002673	regulation of acute inflammatory response	0.000292	4.66	57	8	[C3 - complement component 3, Cd59a - cd59a antigen, A2m - alpha-2-macroglobulin, Cnr1 - cannabinoid receptor 1 (brain), Fcgr2b - fc receptor, igg, low affinity iib, Dnase1l3 - deoxyribonuclease 1-like 3, Cd55 - cd55 antigen, Tnf - tumor necrosis factor]
	GO:0050922	negative regulation of chemotaxis	0.0009	4.47	52	7	[Slit1 - slit homolog 1 (drosophila), Aif1 - allograft inflammatory factor 1, Slit2 - slit homolog 2 (drosophila), Hc - hemolytic complement, C5ar2 - complement component 5a receptor 2, Ccl12 - chemokine (c-c motif) ligand 12, Sema4g - sema domain, immunoglobulin domain (ig), transmembrane domain (tm) and short cytoplasmic domain, (semaphorin) 4g]
	GO:0002573	myeloid leukocyte differentiation	2.53e-05	4.24	94	12	[Notch2 - notch 2, Csf2 - colony stimulating factor 2 (granulocyte-macrophage), Cebpa - ccaat/enhancer binding protein (c/ebp), alpha, Relb - avian reticuloendotheliosis viral (v-rel) oncogene related b, Spib - spi-b transcription factor (spi-1/pu.1 related), Snx10 - sorting nexin 10, Trf - transferrin, Vegfa - vascular endothelial growth factor a, Tnf - tumor necrosis factor, Batf2 - basic leuci…
	GO:0002685	regulation of leukocyte migration	1.8e-08	4.15	176	22	[Ptger4 - prostaglandin e receptor 4 (subtype ep4), Pycard - pyd and card domain containing, Ccl20 - chemokine (c-c motif) ligand 20, C5ar1 - complement component 5a receptor 1, Aif1 - allograft inflammatory factor 1, Slit2 - slit homolog 2 (drosophila), Ccl24 - chemokine (c-c motif) ligand 24, Hc - hemolytic complement, Itga2b - integrin alpha 2b, C5ar2 - complement component 5a receptor 2, Ccl1…
	GO:0002687	positive regulation of leukocyte migration	1.74e-06	4.12	129	16	[Ptger4 - prostaglandin e receptor 4 (subtype ep4), Pycard - pyd and card domain containing, Ccl20 - chemokine (c-c motif) ligand 20, C5ar1 - complement component 5a receptor 1, Aif1 - allograft inflammatory factor 1, Ccl24 - chemokine (c-c motif) ligand 24, Itga2b - integrin alpha 2b, Ccl12 - chemokine (c-c motif) ligand 12, Vegfa - vascular endothelial growth factor a, Pawr - prkc, apoptosis, w…
	GO:0071621	granulocyte chemotaxis	0.000175	4.05	82	10	[Ccl9 - chemokine (c-c motif) ligand 9, Il1rn - interleukin 1 receptor antagonist, Ccl20 - chemokine (c-c motif) ligand 20, Cxcl10 - chemokine (c-x-c motif) ligand 10, C5ar1 - complement component 5a receptor 1, Csf3r - colony stimulating factor 3 receptor (granulocyte), Ccl24 - chemokine (c-c motif) ligand 24, Ccl12 - chemokine (c-c motif) ligand 12, Vegfa - vascular endothelial growth factor a,…
	GO:0070555	response to interleukin-1	0.000374	4.04	74	9	[Ccl9 - chemokine (c-c motif) ligand 9, Pycard - pyd and card domain containing, Il1rn - interleukin 1 receptor antagonist, Ccl20 - chemokine (c-c motif) ligand 20, Fn1 - fibronectin 1, Ccl24 - chemokine (c-c motif) ligand 24, Ccl12 - chemokine (c-c motif) ligand 12, Mylk3 - myosin light chain kinase 3, Src - rous sarcoma oncogene]
	GO:0030595	leukocyte chemotaxis	2.49e-05	3.72	125	14	[Ccl20 - chemokine (c-c motif) ligand 20, C5ar1 - complement component 5a receptor 1, Ccl24 - chemokine (c-c motif) ligand 24, Ccl12 - chemokine (c-c motif) ligand 12, Vegfa - vascular endothelial growth factor a, Ccl9 - chemokine (c-c motif) ligand 9, Il1rn - interleukin 1 receptor antagonist, Cnr2 - cannabinoid receptor 2 (macrophage), Cxcl10 - chemokine (c-x-c motif) ligand 10, Csf3r - colony …
	GO:0097530	granulocyte migration	0.00045	3.61	92	10	[Ccl9 - chemokine (c-c motif) ligand 9, Il1rn - interleukin 1 receptor antagonist, Ccl20 - chemokine (c-c motif) ligand 20, Cxcl10 - chemokine (c-x-c motif) ligand 10, C5ar1 - complement component 5a receptor 1, Csf3r - colony stimulating factor 3 receptor (granulocyte), Ccl24 - chemokine (c-c motif) ligand 24, Ccl12 - chemokine (c-c motif) ligand 12, Vegfa - vascular endothelial growth factor a,…
	GO:0002688	regulation of leukocyte chemotaxis	0.000254	3.58	102	11	[Lgmn - legumain, Aif1 - allograft inflammatory factor 1, Cxcl10 - chemokine (c-x-c motif) ligand 10, C5ar1 - complement component 5a receptor 1, Slit2 - slit homolog 2 (drosophila), Hc - hemolytic complement, C5ar2 - complement component 5a receptor 2, Ccl12 - chemokine (c-c motif) ligand 12, Vegfa - vascular endothelial growth factor a, Ptk2b - ptk2 protein tyrosine kinase 2 beta, Csf1 - colony…
	GO:0002274	myeloid leukocyte activation	0.000873	3.32	100	10	[Notch2 - notch 2, Mrgprx2 - mas-related gpr, member x2, Pycard - pyd and card domain containing, Csf2 - colony stimulating factor 2 (granulocyte-macrophage), Il33 - interleukin 33, Relb - avian reticuloendotheliosis viral (v-rel) oncogene related b, Aif1 - allograft inflammatory factor 1, Dnase1l3 - deoxyribonuclease 1-like 3, Batf2 - basic leucine zipper transcription factor, atf-like 2, Adam9 …
	GO:0034612	response to tumor necrosis factor	0.000297	3.29	121	12	[Ccl9 - chemokine (c-c motif) ligand 9, Pycard - pyd and card domain containing, Ccl20 - chemokine (c-c motif) ligand 20, Sfrp1 - secreted frizzled-related protein 1, Cebpa - ccaat/enhancer binding protein (c/ebp), alpha, Ccl24 - chemokine (c-c motif) ligand 24, Ccl12 - chemokine (c-c motif) ligand 12, Cxcl16 - chemokine (c-x-c motif) ligand 16, Birc2 - baculoviral iap repeat-containing 2, Rps3 -…
	GO:0071356	cellular response to tumor necrosis factor	0.000943	3.29	101	10	[Ccl9 - chemokine (c-c motif) ligand 9, Pycard - pyd and card domain containing, Ccl20 - chemokine (c-c motif) ligand 20, Sfrp1 - secreted frizzled-related protein 1, Cebpa - ccaat/enhancer binding protein (c/ebp), alpha, Ccl24 - chemokine (c-c motif) ligand 24, Ccl12 - chemokine (c-c motif) ligand 12, Birc2 - baculoviral iap repeat-containing 2, Rps3 - ribosomal protein s3, Birc3 - baculoviral i…
	GO:0050715	positive regulation of cytokine secretion	0.000195	3.24	133	13	[Ptger4 - prostaglandin e receptor 4 (subtype ep4), Pycard - pyd and card domain containing, Clec4e - c-type lectin domain family 4, member e, Hc - hemolytic complement, Psg22 - pregnancy-specific glycoprotein 22, Clec9a - c-type lectin domain family 9, member a, Il1rl1 - interleukin 1 receptor-like 1, Postn - periostin, osteoblast specific factor, Il33 - interleukin 33, Ptpn22 - protein tyrosine…
	GO:0050707	regulation of cytokine secretion	1.42e-05	3.21	186	18	[Gpam - glycerol-3-phosphate acyltransferase, mitochondrial, Ptger4 - prostaglandin e receptor 4 (subtype ep4), Pycard - pyd and card domain containing, Fn1 - fibronectin 1, Clec4e - c-type lectin domain family 4, member e, Hc - hemolytic complement, C5ar2 - complement component 5a receptor 2, Psg22 - pregnancy-specific glycoprotein 22, Clec9a - c-type lectin domain family 9, member a, Il1rl1 - i…
	GO:0034341	response to interferon-gamma	0.000768	3.15	116	11	[Ccl9 - chemokine (c-c motif) ligand 9, Ccl20 - chemokine (c-c motif) ligand 20, Irf8 - interferon regulatory factor 8, Gbp8 - guanylate-binding protein 8, Ccl24 - chemokine (c-c motif) ligand 24, Ccl12 - chemokine (c-c motif) ligand 12, Rab20 - rab20, member ras oncogene family, Ifitm6 - interferon induced transmembrane protein 6, Cxcl16 - chemokine (c-x-c motif) ligand 16, Mir511 - microrna 511…
	GO:0050729	positive regulation of inflammatory response	0.000768	3.15	116	11	[C3 - complement component 3, Ptger4 - prostaglandin e receptor 4 (subtype ep4), Ccl9 - chemokine (c-c motif) ligand 9, Cnr1 - cannabinoid receptor 1 (brain), Il33 - interleukin 33, Ccl24 - chemokine (c-c motif) ligand 24, Cd163l1 - cd163 molecule-like 1, Tnip1 - tnfaip3 interacting protein 1, Tnf - tumor necrosis factor, Cd6 - cd6 antigen, Il1rl1 - interleukin 1 receptor-like 1]
	GO:0050900	leukocyte migration	5.79e-05	3	188	17	[Ccl20 - chemokine (c-c motif) ligand 20, C5ar1 - complement component 5a receptor 1, Ccl24 - chemokine (c-c motif) ligand 24, Ccl12 - chemokine (c-c motif) ligand 12, C5ar2 - complement component 5a receptor 2, Vegfa - vascular endothelial growth factor a, Mmp9 - matrix metallopeptidase 9, Ccl9 - chemokine (c-c motif) ligand 9, Il1rn - interleukin 1 receptor antagonist, Cnr2 - cannabinoid recept…
	GO:0060326	cell chemotaxis	8.03e-05	2.92	193	17	[Ccl20 - chemokine (c-c motif) ligand 20, C5ar1 - complement component 5a receptor 1, Ccl24 - chemokine (c-c motif) ligand 24, Ccl12 - chemokine (c-c motif) ligand 12, Lpar1 - lysophosphatidic acid receptor 1, Vegfa - vascular endothelial growth factor a, Ccl9 - chemokine (c-c motif) ligand 9, Il1rn - interleukin 1 receptor antagonist, Cnr2 - cannabinoid receptor 2 (macrophage), Cxcl10 - chemokin…
	GO:0030335	positive regulation of cell migration	5.28e-10	2.89	494	43	[Ptger4 - prostaglandin e receptor 4 (subtype ep4), Vil1 - villin 1, Fn1 - fibronectin 1, Aif1 - allograft inflammatory factor 1, Ccl24 - chemokine (c-c motif) ligand 24, Itga2b - integrin alpha 2b, Lpar1 - lysophosphatidic acid receptor 1, Vegfa - vascular endothelial growth factor a, Pawr - prkc, apoptosis, wt1, regulator, Lamc2 - laminin, gamma 2, Ptk2b - ptk2 protein tyrosine kinase 2 beta, W…
	GO:2000147	positive regulation of cell motility	4.95e-10	2.85	512	44	[Ptger4 - prostaglandin e receptor 4 (subtype ep4), Vil1 - villin 1, Fn1 - fibronectin 1, Aif1 - allograft inflammatory factor 1, Ccl24 - chemokine (c-c motif) ligand 24, Itga2b - integrin alpha 2b, Trf - transferrin, Lpar1 - lysophosphatidic acid receptor 1, Vegfa - vascular endothelial growth factor a, Pawr - prkc, apoptosis, wt1, regulator, Lamc2 - laminin, gamma 2, Ptk2b - ptk2 protein tyrosi…
	GO:0042330	taxis	6.39e-06	2.79	285	24	[Ccl20 - chemokine (c-c motif) ligand 20, Slit1 - slit homolog 1 (drosophila), C5ar1 - complement component 5a receptor 1, Slit2 - slit homolog 2 (drosophila), Ccl24 - chemokine (c-c motif) ligand 24, C5ar2 - complement component 5a receptor 2, Ccl12 - chemokine (c-c motif) ligand 12, Lpar1 - lysophosphatidic acid receptor 1, Vegfa - vascular endothelial growth factor a, Nlgn2 - neuroligin 2, Pdg…
	GO:0006954	inflammatory response	4.95e-07	2.73	377	31	[Ptger4 - prostaglandin e receptor 4 (subtype ep4), Fn1 - fibronectin 1, Ccl24 - chemokine (c-c motif) ligand 24, C5ar2 - complement component 5a receptor 2, Ccl9 - chemokine (c-c motif) ligand 9, Serpina3n - serine (or cysteine) peptidase inhibitor, clade a, member 3n, Cnr2 - cannabinoid receptor 2 (macrophage), Cxcl10 - chemokine (c-x-c motif) ligand 10, Bmp2 - bone morphogenetic protein 2, Cd1…
	GO:0006935	chemotaxis	1.76e-05	2.7	283	23	[Ccl20 - chemokine (c-c motif) ligand 20, Slit1 - slit homolog 1 (drosophila), C5ar1 - complement component 5a receptor 1, Slit2 - slit homolog 2 (drosophila), Ccl24 - chemokine (c-c motif) ligand 24, C5ar2 - complement component 5a receptor 2, Ccl12 - chemokine (c-c motif) ligand 12, Lpar1 - lysophosphatidic acid receptor 1, Vegfa - vascular endothelial growth factor a, Pdgfa - platelet derived …
	GO:0001819	positive regulation of cytokine production	5.63e-07	2.66	399	32	[Ptger4 - prostaglandin e receptor 4 (subtype ep4), Irf8 - interferon regulatory factor 8, Psg22 - pregnancy-specific glycoprotein 22, Wnt11 - wingless-related mmtv integration site 11, Il1rl1 - interleukin 1 receptor-like 1, Postn - periostin, osteoblast specific factor, Csf2 - colony stimulating factor 2 (granulocyte-macrophage), Ltb - lymphotoxin b, Il33 - interleukin 33, Cd163l1 - cd163 molec…
	GO:0050920	regulation of chemotaxis	0.000387	2.65	200	16	[Fn1 - fibronectin 1, Slit1 - slit homolog 1 (drosophila), C5ar1 - complement component 5a receptor 1, Aif1 - allograft inflammatory factor 1, Slit2 - slit homolog 2 (drosophila), Hc - hemolytic complement, Ccl12 - chemokine (c-c motif) ligand 12, C5ar2 - complement component 5a receptor 2, Tiam1 - t cell lymphoma invasion and metastasis 1, Lpar1 - lysophosphatidic acid receptor 1, Vegfa - vascul…
	GO:0050727	regulation of inflammatory response	4.18e-05	2.55	299	23	[C3 - complement component 3, Cd59a - cd59a antigen, Ptger4 - prostaglandin e receptor 4 (subtype ep4), A2m - alpha-2-macroglobulin, Pycard - pyd and card domain containing, Fancd2 - fanconi anemia, complementation group d2, Dnase1l3 - deoxyribonuclease 1-like 3, Fcgr2b - fc receptor, igg, low affinity iib, Slit2 - slit homolog 2 (drosophila), Ccl24 - chemokine (c-c motif) ligand 24, Otud7a - otu…
	GO:0002253	activation of immune response	0.000483	2.44	245	18	[C3 - complement component 3, Pycard - pyd and card domain containing, Skint10 - selection and upkeep of intraepithelial t cells 10, C5ar1 - complement component 5a receptor 1, Fcgr2b - fc receptor, igg, low affinity iib, C2 - complement component 2 (within h-2s), Skint8 - selection and upkeep of intraepithelial t cells 8, Hc - hemolytic complement, C5ar2 - complement component 5a receptor 2, C8g…
	GO:0001817	regulation of cytokine production	3.48e-08	2.42	631	46	[Cd59a - cd59a antigen, Gpam - glycerol-3-phosphate acyltransferase, mitochondrial, Ptger4 - prostaglandin e receptor 4 (subtype ep4), Skint10 - selection and upkeep of intraepithelial t cells 10, Errfi1 - erbb receptor feedback inhibitor 1, Fn1 - fibronectin 1, Irf8 - interferon regulatory factor 8, C5ar2 - complement component 5a receptor 2, Psg22 - pregnancy-specific glycoprotein 22, Wnt11 - w…
	GO:0030334	regulation of cell migration	6.36e-10	2.38	821	59	[Ptger4 - prostaglandin e receptor 4 (subtype ep4), Unc5c - unc-5 homolog c (c. elegans), Fn1 - fibronectin 1, Aif1 - allograft inflammatory factor 1, Lpar1 - lysophosphatidic acid receptor 1, Ptk2b - ptk2 protein tyrosine kinase 2 beta, Wnt11 - wingless-related mmtv integration site 11, Postn - periostin, osteoblast specific factor, Wnt5b - wingless-related mmtv integration site 5b, Ajuba - ajub…
	GO:0006955	immune response	5.79e-08	2.22	794	53	[Il13ra2 - interleukin 13 receptor, alpha 2, Otud7a - otu domain containing 7a, Cfp - complement factor properdin, Mst1r - macrophage stimulating 1 receptor (c-met-related tyrosine kinase), Ptk2b - ptk2 protein tyrosine kinase 2 beta, H2-T10 - histocompatibility 2, t region locus 10, Marco - macrophage receptor with collagenous structure, Daf2 - decay accelerating factor 2, Serpina3g - serine (or…
	GO:0002252	immune effector process	0.000158	2.16	414	27	[Ptger4 - prostaglandin e receptor 4 (subtype ep4), Gpam - glycerol-3-phosphate acyltransferase, mitochondrial, Il13ra2 - interleukin 13 receptor, alpha 2, Dnase1l3 - deoxyribonuclease 1-like 3, C8g - complement component 8, gamma polypeptide, Cfp - complement factor properdin, Ptk2b - ptk2 protein tyrosine kinase 2 beta, Il33 - interleukin 33, Daf2 - decay accelerating factor 2, Cfi - complement…
	GO:0006952	defense response	7.81e-09	2.13	1013	65	[Gpam - glycerol-3-phosphate acyltransferase, mitochondrial, Ptger4 - prostaglandin e receptor 4 (subtype ep4), Fn1 - fibronectin 1, Cfp - complement factor properdin, Mst1r - macrophage stimulating 1 receptor (c-met-related tyrosine kinase), Ptk2b - ptk2 protein tyrosine kinase 2 beta, Marco - macrophage receptor with collagenous structure, Serpina3n - serine (or cysteine) peptidase inhibitor, c…
	GO:0048870	cell motility	7.38e-08	2.13	890	57	[Fn1 - fibronectin 1, Gdnf - glial cell line derived neurotrophic factor, Lpar1 - lysophosphatidic acid receptor 1, Ptk2b - ptk2 protein tyrosine kinase 2 beta, Ajuba - ajuba lim protein, Nrtn - neurturin, Cxcl16 - chemokine (c-x-c motif) ligand 16, Ackr4 - atypical chemokine receptor 4, Ndn - necdin, Cyp7b1 - cytochrome p450, family 7, subfamily b, polypeptide 1, Ccl20 - chemokine (c-c motif) li…
	GO:0016477	cell migration	5.91e-07	2.11	786	50	[Fn1 - fibronectin 1, Gdnf - glial cell line derived neurotrophic factor, Lpar1 - lysophosphatidic acid receptor 1, Ptk2b - ptk2 protein tyrosine kinase 2 beta, Ajuba - ajuba lim protein, Nrtn - neurturin, Ackr4 - atypical chemokine receptor 4, Cxcl16 - chemokine (c-x-c motif) ligand 16, Ndn - necdin, Cyp7b1 - cytochrome p450, family 7, subfamily b, polypeptide 1, Ccl20 - chemokine (c-c motif) li…
	GO:0050776	regulation of immune response	1.02e-05	2.03	704	43	[Cd59a - cd59a antigen, Skint10 - selection and upkeep of intraepithelial t cells 10, Il13ra2 - interleukin 13 receptor, alpha 2, C5ar2 - complement component 5a receptor 2, C8g - complement component 8, gamma polypeptide, Cfp - complement factor properdin, Pawr - prkc, apoptosis, wt1, regulator, H2-T10 - histocompatibility 2, t region locus 10, Il1rl1 - interleukin 1 receptor-like 1, Cnr1 - cann…
	GO:0002376	immune system process	3.72e-09	1.95	1414	83	[Gpam - glycerol-3-phosphate acyltransferase, mitochondrial, Ptger4 - prostaglandin e receptor 4 (subtype ep4), Il13ra2 - interleukin 13 receptor, alpha 2, Aif1 - allograft inflammatory factor 1, Otud7a - otu domain containing 7a, Cfp - complement factor properdin, Mst1r - macrophage stimulating 1 receptor (c-met-related tyrosine kinase), Ptk2b - ptk2 protein tyrosine kinase 2 beta, H2-T10 - hist…
	GO:0031347	regulation of defense response	0.000683	1.87	550	31	[Cd59a - cd59a antigen, Ptger4 - prostaglandin e receptor 4 (subtype ep4), Dnase1l3 - deoxyribonuclease 1-like 3, Ccl24 - chemokine (c-c motif) ligand 24, Otud7a - otu domain containing 7a, Il1rl1 - interleukin 1 receptor-like 1, Ccl9 - chemokine (c-c motif) ligand 9, Cnr1 - cannabinoid receptor 1 (brain), Cnr2 - cannabinoid receptor 2 (macrophage), Il33 - interleukin 33, Socs1 - suppressor of cy…
Exogenous Material Acquisition (Figure 7)	GO:0038094	Fc-gamma receptor signaling pathway	0.000509	16.59	6	3	[Clec4e - c-type lectin domain family 4, member e, Fcgr2b - fc receptor, igg, low affinity iib, Clec4d - c-type lectin domain family 4, member d]
	GO:0006898	receptor-mediated endocytosis	0.000123	3.4	127	23	[Fcgr2b - fc receptor, igg, low affinity iib, Msr1 - macrophage scavenger receptor 1, Pla2r1 - phospholipase a2 receptor 1, Ramp1 - receptor (calcitonin) activity modifying protein 1, Dnajc6 - dnaj (hsp40) homolog, subfamily c, member 6, Ache - acetylcholinesterase, Fcho1 - fch domain only 1, Cacng4 - calcium channel, voltage-dependent, gamma subunit 4, Cxcl16 - chemokine (c-x-c motif) ligand 16,…
	GO:0006897	endocytosis	6.65e-05	2.37	350	25	[Siglec1 - sialic acid binding ig-like lectin 1, sialoadhesin, Irf8 - interferon regulatory factor 8, Syt8 - synaptotagmin viii, Ramp1 - receptor (calcitonin) activity modifying protein 1, Myo1e - myosin ie, Marco - macrophage receptor with collagenous structure, Ache - acetylcholinesterase, Fcho1 - fch domain only 1, Snx10 - sorting nexin 10, Cacng4 - calcium channel, voltage-dependent, gamma su…
	GO:0098657	import into cell	4.54e-06	2.46	419	31	[Siglec1 - sialic acid binding ig-like lectin 1, sialoadhesin, Slc8a2 - solute carrier family 8 (sodium/calcium exchanger), member 2, Irf8 - interferon regulatory factor 8, Slc46a1 - solute carrier family 46, member 1, Pawr - prkc, apoptosis, wt1, regulator, Syt8 - synaptotagmin viii, Steap1 - six transmembrane epithelial antigen of the prostate 1, Ramp1 - receptor (calcitonin) activity modifying…
Other GO Terms	GO:0097116	gephyrin clustering involved in postsynaptic density assembly	0.000907	33.18	2	2	[Nrxn1 - neurexin i, Nlgn2 - neuroligin 2]
	GO:0033563	dorsal/ventral axon guidance	0.000107	24.89	4	3	[Dcc - deleted in colorectal carcinoma, Slit1 - slit homolog 1 (drosophila), Slit2 - slit homolog 2 (drosophila)]
	GO:0071671	regulation of smooth muscle cell chemotaxis	0.00026	19.91	5	3	[Aif1 - allograft inflammatory factor 1, Slit2 - slit homolog 2 (drosophila), Lpar1 - lysophosphatidic acid receptor 1]
	GO:0015015	heparan sulfate proteoglycan biosynthetic process, enzymatic modification	0.00026	19.91	5	3	[Hs6st3 - heparan sulfate 6-o-sulfotransferase 3, Hs6st2 - heparan sulfate 6-o-sulfotransferase 2, Hs3st5 - heparan sulfate (glucosamine) 3-o-sulfotransferase 5]
	GO:0033564	anterior/posterior axon guidance	0.00026	19.91	5	3	[Unc5c - unc-5 homolog c (c. elegans), Dcc - deleted in colorectal carcinoma, Unc5a - unc-5 homolog a (c. elegans)]
	GO:0018120	peptidyl-arginine ADP-ribosylation	0.000509	16.59	6	3	[Art2b - adp-ribosyltransferase 2b, Art4 - adp-ribosyltransferase 4, Art2a-ps - adp-ribosyltransferase 2a, pseudogene]
	GO:0014056	regulation of acetylcholine secretion, neurotransmission	0.000509	16.59	6	3	[Chrna3 - cholinergic receptor, nicotinic, alpha polypeptide 3, Htr2c - 5-hydroxytryptamine (serotonin) receptor 2c, Cacna1a - calcium channel, voltage-dependent, p/q type, alpha 1a subunit]
	GO:0097105	presynaptic membrane assembly	9.12e-05	14.75	9	4	[Ptprd - protein tyrosine phosphatase, receptor type, d, Nrxn1 - neurexin i, Nlgn2 - neuroligin 2, Il1rapl1 - interleukin 1 receptor accessory protein-like 1]
	GO:0051549	positive regulation of keratinocyte migration	9.12e-05	14.75	9	4	[Epb4.1l4b - erythrocyte protein band 4.1-like 4b, Has2 - hyaluronan synthase 2, Adam9 - a disintegrin and metallopeptidase domain 9 (meltrin gamma), Mmp9 - matrix metallopeptidase 9]
	GO:0097090	presynaptic membrane organization	0.000148	13.27	10	4	[Ptprd - protein tyrosine phosphatase, receptor type, d, Nrxn1 - neurexin i, Nlgn2 - neuroligin 2, Il1rapl1 - interleukin 1 receptor accessory protein-like 1]
	GO:0097242	amyloid-beta clearance	0.000148	13.27	10	4	[C3 - complement component 3, Mme - membrane metallo endopeptidase, Msr1 - macrophage scavenger receptor 1, Marco - macrophage receptor with collagenous structure]
	GO:0051547	regulation of keratinocyte migration	0.000228	12.07	11	4	[Epb4.1l4b - erythrocyte protein band 4.1-like 4b, Has2 - hyaluronan synthase 2, Adam9 - a disintegrin and metallopeptidase domain 9 (meltrin gamma), Mmp9 - matrix metallopeptidase 9]
	GO:0042482	positive regulation of odontogenesis	0.00047	10.21	13	4	[Ngfr - nerve growth factor receptor (tnfr superfamily, member 16), Wnt6 - wingless-related mmtv integration site 6, Bmp2 - bone morphogenetic protein 2, Csf1 - colony stimulating factor 1 (macrophage)]
	GO:0048172	regulation of short-term neuronal synaptic plasticity	0.000151	9.22	18	5	[Syp - synaptophysin, Slc8a2 - solute carrier family 8 (sodium/calcium exchanger), member 2, Shisa6 - shisa homolog 6 (xenopus laevis), Syt4 - synaptotagmin iv, Syn1 - synapsin i]
	GO:0032222	regulation of synaptic transmission, cholinergic	0.000856	8.85	15	4	[Ngfr - nerve growth factor receptor (tnfr superfamily, member 16), Chrna3 - cholinergic receptor, nicotinic, alpha polypeptide 3, Htr2c - 5-hydroxytryptamine (serotonin) receptor 2c, Cacna1a - calcium channel, voltage-dependent, p/q type, alpha 1a subunit]
	GO:2000463	positive regulation of excitatory postsynaptic potential	5.78e-05	6.83	34	7	[Rims2 - regulating synaptic membrane exocytosis 2, Ngfr - nerve growth factor receptor (tnfr superfamily, member 16), Cux2 - cut-like homeobox 2, Nrxn1 - neurexin i, Nlgn2 - neuroligin 2, Ptk2b - ptk2 protein tyrosine kinase 2 beta, Rgs4 - regulator of g-protein signaling 4]
	GO:0035418	protein localization to synapse	5.78e-05	6.83	34	7	[Arhgap44 - rho gtpase activating protein 44, Nrxn1 - neurexin i, Grin2c - glutamate receptor, ionotropic, nmda2c (epsilon 3), Stau2 - staufen (rna binding protein) homolog 2 (drosophila), Nlgn2 - neuroligin 2, Pclo - piccolo (presynaptic cytomatrix protein), Dlg2 - discs, large homolog 2 (drosophila)]
	GO:0007269	neurotransmitter secretion	7.04e-05	6.64	35	7	[Rims2 - regulating synaptic membrane exocytosis 2, Nrxn1 - neurexin i, Syt4 - synaptotagmin iv, Snap91 - synaptosomal-associated protein 91, Syn1 - synapsin i, Cacna1b - calcium channel, voltage-dependent, n type, alpha 1b subunit, Pak1 - p21 protein (cdc42/rac)-activated kinase 1]
	GO:1904646	cellular response to amyloid-beta	0.000788	6.64	25	5	[Ngfr - nerve growth factor receptor (tnfr superfamily, member 16), Lgmn - legumain, Fcgr2b - fc receptor, igg, low affinity iib, Igf1 - insulin-like growth factor 1, Cacna1a - calcium channel, voltage-dependent, p/q type, alpha 1a subunit]
	GO:0051968	positive regulation of synaptic transmission, glutamatergic	8.52e-05	6.45	36	7	[Ngfr - nerve growth factor receptor (tnfr superfamily, member 16), Gria4 - glutamate receptor, ionotropic, ampa4 (alpha 4), Nrxn1 - neurexin i, Cacng4 - calcium channel, voltage-dependent, gamma subunit 4, Nlgn2 - neuroligin 2, Ptk2b - ptk2 protein tyrosine kinase 2 beta, Iqsec2 - iq motif and sec7 domain 2]
	GO:1904707	positive regulation of vascular smooth muscle cell proliferation	0.00034	6.22	32	6	[Ern1 - endoplasmic reticulum (er) to nucleus signalling 1, Igf1 - insulin-like growth factor 1, Hpgd - hydroxyprostaglandin dehydrogenase 15 (nad), Tnf - tumor necrosis factor, Pak1 - p21 protein (cdc42/rac)-activated kinase 1, Mmp9 - matrix metallopeptidase 9]
	GO:0051965	positive regulation of synapse assembly	5.43e-08	6.11	76	14	[Ephb2 - eph receptor b2, Ptprd - protein tyrosine phosphatase, receptor type, d, Lrrn3 - leucine rich repeat protein 3, neuronal, Lrrn1 - leucine rich repeat protein 1, neuronal, Slitrk5 - slit and ntrk-like family, member 5, Nlgn2 - neuroligin 2, Flrt2 - fibronectin leucine rich transmembrane protein 2, Lphn3 - latrophilin 3, Cux2 - cut-like homeobox 2, Lrrtm4 - leucine rich repeat transmembran…
	GO:0019233	sensory perception of pain	2.33e-06	5.31	75	12	[Ngfr - nerve growth factor receptor (tnfr superfamily, member 16), Bdkrb1 - bradykinin receptor, beta 1, Kcna2 - potassium voltage-gated channel, shaker-related subfamily, member 2, Il1rn - interleukin 1 receptor antagonist, Cnr1 - cannabinoid receptor 1 (brain), Cnr2 - cannabinoid receptor 2 (macrophage), Mme - membrane metallo endopeptidase, Nlgn2 - neuroligin 2, Dlg2 - discs, large homolog 2 …
	GO:0007416	synapse assembly	0.000114	5.31	50	8	[Lphn3 - latrophilin 3, Flrt3 - fibronectin leucine rich transmembrane protein 3, Ache - acetylcholinesterase, Nrxn1 - neurexin i, Nlgn2 - neuroligin 2, Pclo - piccolo (presynaptic cytomatrix protein), Gpr110 - g protein-coupled receptor 110, Cacna1a - calcium channel, voltage-dependent, p/q type, alpha 1a subunit]
	GO:0051963	regulation of synapse assembly	1.34e-07	5.3	94	15	[Ephb2 - eph receptor b2, Ptprd - protein tyrosine phosphatase, receptor type, d, Lrrn3 - leucine rich repeat protein 3, neuronal, Lrrn1 - leucine rich repeat protein 1, neuronal, Slitrk5 - slit and ntrk-like family, member 5, Colq - collagen-like tail subunit (single strand of homotrimer) of asymmetric acetylcholinesterase, Nlgn2 - neuroligin 2, Lphn3 - latrophilin 3, Flrt2 - fibronectin leucine…
	GO:0046885	regulation of hormone biosynthetic process	0.000888	5.24	38	6	[Stc2 - stanniocalcin 2, Igf1 - insulin-like growth factor 1, Bmp2 - bone morphogenetic protein 2, Vdr - vitamin d receptor, Tnf - tumor necrosis factor, Cacna1a - calcium channel, voltage-dependent, p/q type, alpha 1a subunit]
	GO:0099643	signal release from synapse	8.47e-06	5.14	71	11	[Rims2 - regulating synaptic membrane exocytosis 2, Syt13 - synaptotagmin xiii, Nrxn1 - neurexin i, Syt4 - synaptotagmin iv, Snap91 - synaptosomal-associated protein 91, Cadps - ca2+-dependent secretion activator, Syt8 - synaptotagmin viii, Syn1 - synapsin i, Cacna1a - calcium channel, voltage-dependent, p/q type, alpha 1a subunit, Cacna1b - calcium channel, voltage-dependent, n type, alpha 1b su…
	GO:0014911	positive regulation of smooth muscle cell migration	6.34e-05	5.06	59	9	[Ptger4 - prostaglandin e receptor 4 (subtype ep4), Cyp1b1 - cytochrome p450, family 1, subfamily b, polypeptide 1, Aif1 - allograft inflammatory factor 1, Has2 - hyaluronan synthase 2, Igf1 - insulin-like growth factor 1, Lpar1 - lysophosphatidic acid receptor 1, Src - rous sarcoma oncogene, Pak1 - p21 protein (cdc42/rac)-activated kinase 1, Postn - periostin, osteoblast specific factor]
	GO:0046928	regulation of neurotransmitter secretion	3.47e-05	4.88	68	10	[Kcnc3 - potassium voltage gated channel, shaw-related subfamily, member 3, Rims2 - regulating synaptic membrane exocytosis 2, Camk2a - calcium/calmodulin-dependent protein kinase ii alpha, Ptger4 - prostaglandin e receptor 4 (subtype ep4), Chrna3 - cholinergic receptor, nicotinic, alpha polypeptide 3, Syt4 - synaptotagmin iv, Htr2c - 5-hydroxytryptamine (serotonin) receptor 2c, Pnkd - paroxysmal…
	GO:2001023	regulation of response to drug	5.91e-07	4.74	105	15	[Ptger4 - prostaglandin e receptor 4 (subtype ep4), Syt4 - synaptotagmin iv, Gdnf - glial cell line derived neurotrophic factor, Htr2c - 5-hydroxytryptamine (serotonin) receptor 2c, Pawr - prkc, apoptosis, wt1, regulator, Reg3b - regenerating islet-derived 3 beta, Cacna1a - calcium channel, voltage-dependent, p/q type, alpha 1a subunit, Epor - erythropoietin receptor, Pcp4 - purkinje cell protein…
	GO:1905207	regulation of cardiocyte differentiation	0.000258	4.74	56	8	[Col14a1 - collagen, type xiv, alpha 1, Igf1 - insulin-like growth factor 1, Bmp2 - bone morphogenetic protein 2, Gata6 - gata binding protein 6, Fzd7 - frizzled homolog 7 (drosophila), Gata4 - gata binding protein 4, Pak1 - p21 protein (cdc42/rac)-activated kinase 1, Rgs4 - regulator of g-protein signaling 4]
	GO:0051955	regulation of amino acid transport	0.000625	4.74	49	7	[Avpr1a - arginine vasopressin receptor 1a, Il1rn - interleukin 1 receptor antagonist, Syt4 - synaptotagmin iv, Htr2c - 5-hydroxytryptamine (serotonin) receptor 2c, Slc6a1 - solute carrier family 6 (neurotransmitter transporter, gaba), member 1, Tnf - tumor necrosis factor, Rgs4 - regulator of g-protein signaling 4]
	GO:0098815	modulation of excitatory postsynaptic potential	0.000625	4.74	49	7	[Rims2 - regulating synaptic membrane exocytosis 2, Ngfr - nerve growth factor receptor (tnfr superfamily, member 16), Cux2 - cut-like homeobox 2, Nrxn1 - neurexin i, Nlgn2 - neuroligin 2, Ptk2b - ptk2 protein tyrosine kinase 2 beta, Rgs4 - regulator of g-protein signaling 4]
	GO:0051952	regulation of amine transport	6.7e-07	4.7	106	15	[Syt4 - synaptotagmin iv, Gdnf - glial cell line derived neurotrophic factor, Htr2c - 5-hydroxytryptamine (serotonin) receptor 2c, Cacna1a - calcium channel, voltage-dependent, p/q type, alpha 1a subunit, Pcp4 - purkinje cell protein 4, Avpr1a - arginine vasopressin receptor 1a, Kcna2 - potassium voltage-gated channel, shaker-related subfamily, member 2, Il1rn - interleukin 1 receptor antagonist,…
	GO:0043507	positive regulation of JUN kinase activity	2.4e-05	4.62	79	11	[Ern1 - endoplasmic reticulum (er) to nucleus signalling 1, Fzd10 - frizzled homolog 10 (drosophila), Il1rn - interleukin 1 receptor antagonist, Trf - transferrin, Tiam1 - t cell lymphoma invasion and metastasis 1, Fgd4 - fyve, rhogef and ph domain containing 4, Tnf - tumor necrosis factor, Ptk2b - ptk2 protein tyrosine kinase 2 beta, Rps3 - ribosomal protein s3, Pak1 - p21 protein (cdc42/rac)-ac…
	GO:0031646	positive regulation of neurological system process	5.74e-05	4.61	72	10	[Rims2 - regulating synaptic membrane exocytosis 2, Ngfr - nerve growth factor receptor (tnfr superfamily, member 16), Tenm4 - teneurin transmembrane protein 4, Cux2 - cut-like homeobox 2, Nrxn1 - neurexin i, Trf - transferrin, Nlgn2 - neuroligin 2, Pawr - prkc, apoptosis, wt1, regulator, Ptk2b - ptk2 protein tyrosine kinase 2 beta, Rgs4 - regulator of g-protein signaling 4]
	GO:0043506	regulation of JUN kinase activity	4.8e-06	4.59	94	13	[Ern1 - endoplasmic reticulum (er) to nucleus signalling 1, Fzd10 - frizzled homolog 10 (drosophila), Sfrp1 - secreted frizzled-related protein 1, Trf - transferrin, Tiam1 - t cell lymphoma invasion and metastasis 1, Fgd4 - fyve, rhogef and ph domain containing 4, Ptk2b - ptk2 protein tyrosine kinase 2 beta, Pak1 - p21 protein (cdc42/rac)-activated kinase 1, Zeb2 - zinc finger e-box binding homeo…
	GO:0048168	regulation of neuronal synaptic plasticity	0.000137	4.59	65	9	[Ephb2 - eph receptor b2, Syp - synaptophysin, Camk2a - calcium/calmodulin-dependent protein kinase ii alpha, Slc8a2 - solute carrier family 8 (sodium/calcium exchanger), member 2, Shisa6 - shisa homolog 6 (xenopus laevis), Fcgr2b - fc receptor, igg, low affinity iib, Syt4 - synaptotagmin iv, Jph3 - junctophilin 3, Syn1 - synapsin i]
	GO:0051954	positive regulation of amine transport	0.000799	4.55	51	7	[Avpr1a - arginine vasopressin receptor 1a, Syt4 - synaptotagmin iv, Htr2c - 5-hydroxytryptamine (serotonin) receptor 2c, Slc18a1 - solute carrier family 18 (vesicular monoamine), member 1, Slc6a1 - solute carrier family 6 (neurotransmitter transporter, gaba), member 1, Plcd1 - phospholipase c, delta 1, Pcp4 - purkinje cell protein 4]
	GO:0050775	positive regulation of dendrite morphogenesis	0.0009	4.47	52	7	[Cux2 - cut-like homeobox 2, Ptprd - protein tyrosine phosphatase, receptor type, d, Ache - acetylcholinesterase, Tiam1 - t cell lymphoma invasion and metastasis 1, Stau2 - staufen (rna binding protein) homolog 2 (drosophila), Il1rapl1 - interleukin 1 receptor accessory protein-like 1, Pak3 - p21 protein (cdc42/rac)-activated kinase 3]
	GO:0032890	regulation of organic acid transport	8.18e-05	4.42	75	10	[Avpr1a - arginine vasopressin receptor 1a, Acsl6 - acyl-coa synthetase long-chain family member 6, Il1rn - interleukin 1 receptor antagonist, Syt4 - synaptotagmin iv, Htr2c - 5-hydroxytryptamine (serotonin) receptor 2c, Irs2 - insulin receptor substrate 2, Slc6a1 - solute carrier family 6 (neurotransmitter transporter, gaba), member 1, Tnf - tumor necrosis factor, Pla2r1 - phospholipase a2 recep…
	GO:0051588	regulation of neurotransmitter transport	1.54e-06	4.4	113	15	[Kcnc3 - potassium voltage gated channel, shaw-related subfamily, member 3, Ptger4 - prostaglandin e receptor 4 (subtype ep4), Camk2a - calcium/calmodulin-dependent protein kinase ii alpha, Syt4 - synaptotagmin iv, Gdnf - glial cell line derived neurotrophic factor, Htr2c - 5-hydroxytryptamine (serotonin) receptor 2c, Cacna1a - calcium channel, voltage-dependent, p/q type, alpha 1a subunit, Cacna…
	GO:0014910	regulation of smooth muscle cell migration	3.85e-05	4.4	83	11	[Ptger4 - prostaglandin e receptor 4 (subtype ep4), Cyp1b1 - cytochrome p450, family 1, subfamily b, polypeptide 1, Aif1 - allograft inflammatory factor 1, Slit2 - slit homolog 2 (drosophila), Has2 - hyaluronan synthase 2, Igf1 - insulin-like growth factor 1, Lpar1 - lysophosphatidic acid receptor 1, Pdgfa - platelet derived growth factor, alpha, Src - rous sarcoma oncogene, Pak1 - p21 protein (c…
	GO:0060688	regulation of morphogenesis of a branching structure	0.000802	4.02	66	8	[Ntn4 - netrin 4, Sfrp1 - secreted frizzled-related protein 1, Gdnf - glial cell line derived neurotrophic factor, Vegfa - vascular endothelial growth factor a, Pdgfa - platelet derived growth factor, alpha, Tnf - tumor necrosis factor, Cpe - carboxypeptidase e, Six2 - sine oculis-related homeobox 2]
	GO:0070374	positive regulation of ERK1 and ERK2 cascade	2.71e-10	3.98	242	29	[Ccl24 - chemokine (c-c motif) ligand 24, C5ar2 - complement component 5a receptor 2, Vegfa - vascular endothelial growth factor a, Mst1r - macrophage stimulating 1 receptor (c-met-related tyrosine kinase), Ptk2b - ptk2 protein tyrosine kinase 2 beta, Marco - macrophage receptor with collagenous structure, Ccl9 - chemokine (c-c motif) ligand 9, Insrr - insulin receptor-related receptor, Nrxn1 - n…
	GO:0045913	positive regulation of carbohydrate metabolic process	0.000457	3.93	76	9	[Ptger4 - prostaglandin e receptor 4 (subtype ep4), Adra1b - adrenergic receptor, alpha 1b, Has2 - hyaluronan synthase 2, Irs2 - insulin receptor substrate 2, Igf1 - insulin-like growth factor 1, Hnf4a - hepatic nuclear factor 4, alpha, Esrrb - estrogen related receptor, beta, Src - rous sarcoma oncogene, Plcd1 - phospholipase c, delta 1]
	GO:0050807	regulation of synapse organization	5.99e-08	3.88	188	22	[Ephb2 - eph receptor b2, Shisa6 - shisa homolog 6 (xenopus laevis), Ptprd - protein tyrosine phosphatase, receptor type, d, Fcgr2b - fc receptor, igg, low affinity iib, Snap91 - synaptosomal-associated protein 91, Lrrn3 - leucine rich repeat protein 3, neuronal, Lrrn1 - leucine rich repeat protein 1, neuronal, Slitrk5 - slit and ntrk-like family, member 5, Tiam1 - t cell lymphoma invasion and me…
	GO:0014015	positive regulation of gliogenesis	0.000504	3.88	77	9	[Tenm4 - teneurin transmembrane protein 4, Nkx6-1 - nk6 homeobox 1, Trf - transferrin, Igf1 - insulin-like growth factor 1, Tiam1 - t cell lymphoma invasion and metastasis 1, Bmp2 - bone morphogenetic protein 2, Lrp2 - low density lipoprotein receptor-related protein 2, Olig2 - oligodendrocyte transcription factor 2, Csf1 - colony stimulating factor 1 (macrophage)]
	GO:0051897	positive regulation of protein kinase B signaling	0.000135	3.84	95	11	[Ngfr - nerve growth factor receptor (tnfr superfamily, member 16), Nrxn1 - neurexin i, Meis3 - meis homeobox 3, Igf1 - insulin-like growth factor 1, Vegfa - vascular endothelial growth factor a, Pdgfa - platelet derived growth factor, alpha, Mst1r - macrophage stimulating 1 receptor (c-met-related tyrosine kinase), Tnf - tumor necrosis factor, Angpt1 - angiopoietin 1, Hpse - heparanase, Src - ro…
	GO:0044070	regulation of anion transport	4.37e-05	3.75	115	13	[Acsl6 - acyl-coa synthetase long-chain family member 6, Syt4 - synaptotagmin iv, Htr2c - 5-hydroxytryptamine (serotonin) receptor 2c, Pla2r1 - phospholipase a2 receptor 1, Avpr1a - arginine vasopressin receptor 1a, Prkg2 - protein kinase, cgmp-dependent, type ii, Il1rn - interleukin 1 receptor antagonist, Stc2 - stanniocalcin 2, Irs2 - insulin receptor substrate 2, Fgf23 - fibroblast growth fact…
	GO:0060998	regulation of dendritic spine development	0.000344	3.73	89	10	[Arhgap44 - rho gtpase activating protein 44, Ngfr - nerve growth factor receptor (tnfr superfamily, member 16), Cux2 - cut-like homeobox 2, Sdk1 - sidekick homolog 1 (chicken), Tiam1 - t cell lymphoma invasion and metastasis 1, Stau2 - staufen (rna binding protein) homolog 2 (drosophila), Lpar1 - lysophosphatidic acid receptor 1, Nlgn2 - neuroligin 2, Fstl4 - follistatin-like 4, Pak3 - p21 prote…
	GO:0070372	regulation of ERK1 and ERK2 cascade	1.42e-11	3.71	322	36	[Errfi1 - erbb receptor feedback inhibitor 1, Fn1 - fibronectin 1, Ccl24 - chemokine (c-c motif) ligand 24, C5ar2 - complement component 5a receptor 2, Vegfa - vascular endothelial growth factor a, Mst1r - macrophage stimulating 1 receptor (c-met-related tyrosine kinase), Ptk2b - ptk2 protein tyrosine kinase 2 beta, Marco - macrophage receptor with collagenous structure, Ccl9 - chemokine (c-c mot…
	GO:0060411	cardiac septum morphogenesis	0.000875	3.6	83	9	[Dnah11 - dynein, axonemal, heavy chain 11, Notch2 - notch 2, Slit2 - slit homolog 2 (drosophila), Cfc1 - cripto, frl-1, cryptic family 1, Gata6 - gata binding protein 6, Gata4 - gata binding protein 4, Lrp2 - low density lipoprotein receptor-related protein 2, Wnt11 - wingless-related mmtv integration site 11, Fzd1 - frizzled homolog 1 (drosophila)]
	GO:0050808	synapse organization	2.83e-05	3.48	143	15	[Ctnnd2 - catenin (cadherin associated protein), delta 2, Igsf21 - immunoglobulin superfamily, member 21, Nlgn2 - neuroligin 2, Pclo - piccolo (presynaptic cytomatrix protein), Cacna1a - calcium channel, voltage-dependent, p/q type, alpha 1a subunit, Pak1 - p21 protein (cdc42/rac)-activated kinase 1, Lphn3 - latrophilin 3, Arhgap44 - rho gtpase activating protein 44, Lrrtm4 - leucine rich repeat …
	GO:0023061	signal release	1.61e-05	3.47	153	16	[Glp1r - glucagon-like peptide 1 receptor, Gpr119 - g-protein coupled receptor 119, Syt4 - synaptotagmin iv, Snap91 - synaptosomal-associated protein 91, Cadps - ca2+-dependent secretion activator, Syt8 - synaptotagmin viii, Pclo - piccolo (presynaptic cytomatrix protein), Cacna1a - calcium channel, voltage-dependent, p/q type, alpha 1a subunit, Cacna1b - calcium channel, voltage-dependent, n typ…
	GO:0046330	positive regulation of JNK cascade	6.39e-05	3.42	136	14	[Ern1 - endoplasmic reticulum (er) to nucleus signalling 1, Fzd10 - frizzled homolog 10 (drosophila), Pycard - pyd and card domain containing, Fcgr2b - fc receptor, igg, low affinity iib, Dusp15 - dual specificity phosphatase-like 15, Trf - transferrin, Tiam1 - t cell lymphoma invasion and metastasis 1, Fgd4 - fyve, rhogef and ph domain containing 4, Ptk2b - ptk2 protein tyrosine kinase 2 beta, P…
	GO:0042102	positive regulation of T cell proliferation	0.000745	3.39	98	10	[Ccdc88b - coiled-coil domain containing 88b, Gpam - glycerol-3-phosphate acyltransferase, mitochondrial, Pycard - pyd and card domain containing, Aif1 - allograft inflammatory factor 1, Igf1 - insulin-like growth factor 1, Ptpn22 - protein tyrosine phosphatase, non-receptor type 22 (lymphoid), Cd163l1 - cd163 molecule-like 1, Rps3 - ribosomal protein s3, Cd209e - cd209e antigen, Cd6 - cd6 antige…
	GO:0048588	developmental cell growth	0.000745	3.39	98	10	[Adra1b - adrenergic receptor, alpha 1b, Flrt3 - fibronectin leucine rich transmembrane protein 3, Slit1 - slit homolog 1 (drosophila), Slit2 - slit homolog 2 (drosophila), Tiam1 - t cell lymphoma invasion and metastasis 1, Wasf1 - was protein family, member 1, Gata4 - gata binding protein 4, Ndn - necdin, Zeb2 - zinc finger e-box binding homeobox 2, Postn - periostin, osteoblast specific factor]
	GO:0006836	neurotransmitter transport	0.000133	3.37	128	13	[Snap91 - synaptosomal-associated protein 91, Syt4 - synaptotagmin iv, Slc6a15 - solute carrier family 6 (neurotransmitter transporter), member 15, Cacna1a - calcium channel, voltage-dependent, p/q type, alpha 1a subunit, Cacna1b - calcium channel, voltage-dependent, n type, alpha 1b subunit, Sv2b - synaptic vesicle glycoprotein 2 b, Pak1 - p21 protein (cdc42/rac)-activated kinase 1, Rims2 - regu…
	GO:1905330	regulation of morphogenesis of an epithelium	0.000453	3.35	109	11	[Ntn4 - netrin 4, Sfrp1 - secreted frizzled-related protein 1, Cxcl10 - chemokine (c-x-c motif) ligand 10, Gdnf - glial cell line derived neurotrophic factor, Ajap1 - adherens junction associated protein 1, Vegfa - vascular endothelial growth factor a, Pdgfa - platelet derived growth factor, alpha, Tnf - tumor necrosis factor, Wnt11 - wingless-related mmtv integration site 11, Six2 - sine oculis-…
	GO:0032874	positive regulation of stress-activated MAPK cascade	2.6e-05	3.34	159	16	[Ern1 - endoplasmic reticulum (er) to nucleus signalling 1, Fzd10 - frizzled homolog 10 (drosophila), Pycard - pyd and card domain containing, Fcgr2b - fc receptor, igg, low affinity iib, Dusp15 - dual specificity phosphatase-like 15, Trf - transferrin, Tiam1 - t cell lymphoma invasion and metastasis 1, Vegfa - vascular endothelial growth factor a, Fgd4 - fyve, rhogef and ph domain containing 4, …
	GO:0043406	positive regulation of MAP kinase activity	8.68e-07	3.33	219	22	[Ern1 - endoplasmic reticulum (er) to nucleus signalling 1, Adra2a - adrenergic receptor, alpha 2a, Fzd10 - frizzled homolog 10 (drosophila), Trf - transferrin, Lpar1 - lysophosphatidic acid receptor 1, Tiam1 - t cell lymphoma invasion and metastasis 1, Vegfa - vascular endothelial growth factor a, Fgd4 - fyve, rhogef and ph domain containing 4, Mst1r - macrophage stimulating 1 receptor (c-met-re…
	GO:0070304	positive regulation of stress-activated protein kinase signaling cascade	2.81e-05	3.32	160	16	[Ern1 - endoplasmic reticulum (er) to nucleus signalling 1, Fzd10 - frizzled homolog 10 (drosophila), Pycard - pyd and card domain containing, Fcgr2b - fc receptor, igg, low affinity iib, Dusp15 - dual specificity phosphatase-like 15, Trf - transferrin, Tiam1 - t cell lymphoma invasion and metastasis 1, Vegfa - vascular endothelial growth factor a, Fgd4 - fyve, rhogef and ph domain containing 4, …
	GO:0016049	cell growth	0.000943	3.29	101	10	[Adra1b - adrenergic receptor, alpha 1b, Flrt3 - fibronectin leucine rich transmembrane protein 3, Slit1 - slit homolog 1 (drosophila), Slit2 - slit homolog 2 (drosophila), Tiam1 - t cell lymphoma invasion and metastasis 1, Wasf1 - was protein family, member 1, Gata4 - gata binding protein 4, Ndn - necdin, Zeb2 - zinc finger e-box binding homeobox 2, Postn - periostin, osteoblast specific factor]
	GO:0001505	regulation of neurotransmitter levels	1.32e-07	3.27	264	26	[Camk2a - calcium/calmodulin-dependent protein kinase ii alpha, Ptger4 - prostaglandin e receptor 4 (subtype ep4), Aif1 - allograft inflammatory factor 1, Snap91 - synaptosomal-associated protein 91, Gdnf - glial cell line derived neurotrophic factor, Colq - collagen-like tail subunit (single strand of homotrimer) of asymmetric acetylcholinesterase, Ptk2b - ptk2 protein tyrosine kinase 2 beta, Rn…
	GO:0010951	negative regulation of endopeptidase activity	2.16e-05	3.24	174	17	[Serpina11 - serine (or cysteine) peptidase inhibitor, clade a (alpha-1 antiproteinase, antitrypsin), member 11, Vegfa - vascular endothelial growth factor a, Cryaa - crystallin, alpha a, Mmp9 - matrix metallopeptidase 9, Spock1 - sparc/osteonectin, cwcv and kazal-like domains proteoglycan 1, Spock3 - sparc/osteonectin, cwcv and kazal-like domains proteoglycan 3, Serpina3n - serine (or cysteine) …
	GO:0031644	regulation of neurological system process	0.000138	3.18	146	14	[Ngfr - nerve growth factor receptor (tnfr superfamily, member 16), Htr2c - 5-hydroxytryptamine (serotonin) receptor 2c, Trf - transferrin, Nlgn2 - neuroligin 2, Pawr - prkc, apoptosis, wt1, regulator, Ptk2b - ptk2 protein tyrosine kinase 2 beta, Rims2 - regulating synaptic membrane exocytosis 2, Tenm4 - teneurin transmembrane protein 4, Avpr1a - arginine vasopressin receptor 1a, Cux2 - cut-like …
	GO:0043410	positive regulation of MAPK cascade	1.45e-12	3.15	517	49	[Ern1 - endoplasmic reticulum (er) to nucleus signalling 1, Fzd10 - frizzled homolog 10 (drosophila), Trf - transferrin, Lpar1 - lysophosphatidic acid receptor 1, Mst1r - macrophage stimulating 1 receptor (c-met-related tyrosine kinase), Fgd4 - fyve, rhogef and ph domain containing 4, Ptk2b - ptk2 protein tyrosine kinase 2 beta, Marco - macrophage receptor with collagenous structure, Insrr - insu…
	GO:0097485	neuron projection guidance	3.58e-05	3.12	181	17	[Ephb2 - eph receptor b2, Ngfr - nerve growth factor receptor (tnfr superfamily, member 16), Unc5c - unc-5 homolog c (c. elegans), Dcc - deleted in colorectal carcinoma, Unc5a - unc-5 homolog a (c. elegans), Slit1 - slit homolog 1 (drosophila), Cntn4 - contactin 4, Slit2 - slit homolog 2 (drosophila), Gdnf - glial cell line derived neurotrophic factor, Vegfa - vascular endothelial growth factor a…
	GO:2001257	regulation of cation channel activity	0.000104	3.11	160	15	[Ephb2 - eph receptor b2, Shisa6 - shisa homolog 6 (xenopus laevis), Kcnc1 - potassium voltage gated channel, shaw-related subfamily, member 1, Nlgn2 - neuroligin 2, Hcn1 - hyperpolarization-activated, cyclic nucleotide-gated k+ 1, Ptk2b - ptk2 protein tyrosine kinase 2 beta, Cacna1a - calcium channel, voltage-dependent, p/q type, alpha 1a subunit, Kcnj1 - potassium inwardly-rectifying channel, s…
	GO:0071248	cellular response to metal ion	0.000499	3.11	128	12	[Fn1 - fibronectin 1, Lgmn - legumain, Nrxn1 - neurexin i, Cebpa - ccaat/enhancer binding protein (c/ebp), alpha, Mt2 - metallothionein 2, Trf - transferrin, Mt1 - metallothionein 1, Trpm2 - transient receptor potential cation channel, subfamily m, member 2, Dlg2 - discs, large homolog 2 (drosophila), Hvcn1 - hydrogen voltage-gated channel 1, Kcnj1 - potassium inwardly-rectifying channel, subfami…
	GO:0007411	axon guidance	0.000102	2.98	178	16	[Ephb2 - eph receptor b2, Ngfr - nerve growth factor receptor (tnfr superfamily, member 16), Unc5c - unc-5 homolog c (c. elegans), Dcc - deleted in colorectal carcinoma, Unc5a - unc-5 homolog a (c. elegans), Cntn4 - contactin 4, Slit1 - slit homolog 1 (drosophila), Slit2 - slit homolog 2 (drosophila), Gdnf - glial cell line derived neurotrophic factor, Vegfa - vascular endothelial growth factor a…
	GO:0043524	negative regulation of neuron apoptotic process	0.000167	2.98	167	15	[Glp1r - glucagon-like peptide 1 receptor, Ngfr - nerve growth factor receptor (tnfr superfamily, member 16), C5ar1 - complement component 5a receptor 1, Gdnf - glial cell line derived neurotrophic factor, Ccl12 - chemokine (c-c motif) ligand 12, Sct - secretin, Vegfa - vascular endothelial growth factor a, Reg3b - regenerating islet-derived 3 beta, Ptk2b - ptk2 protein tyrosine kinase 2 beta, Ca…
	GO:0050777	negative regulation of immune response	0.000455	2.98	145	13	[Cd59a - cd59a antigen, A2m - alpha-2-macroglobulin, Il13ra2 - interleukin 13 receptor, alpha 2, Fcgr2b - fc receptor, igg, low affinity iib, Clec4g - c-type lectin domain family 4, member g, Il1rl1 - interleukin 1 receptor-like 1, Il33 - interleukin 33, Muc4 - mucin 4, Tnf - tumor necrosis factor, Angpt1 - angiopoietin 1, Il27ra - interleukin 27 receptor, alpha, Tnfaip3 - tumor necrosis factor, …
	GO:0019932	second-messenger-mediated signaling	3.62e-06	2.97	257	23	[Glp1r - glucagon-like peptide 1 receptor, Ptger4 - prostaglandin e receptor 4 (subtype ep4), Adra2a - adrenergic receptor, alpha 2a, Adra1b - adrenergic receptor, alpha 1b, Ccl20 - chemokine (c-c motif) ligand 20, Mt2 - metallothionein 2, Htr2c - 5-hydroxytryptamine (serotonin) receptor 2c, Pthlh - parathyroid hormone-like peptide, Pclo - piccolo (presynaptic cytomatrix protein), Ramp1 - recepto…
	GO:0046328	regulation of JNK cascade	0.000109	2.97	179	16	[Ern1 - endoplasmic reticulum (er) to nucleus signalling 1, Fzd10 - frizzled homolog 10 (drosophila), Pycard - pyd and card domain containing, Sfrp1 - secreted frizzled-related protein 1, Fcgr2b - fc receptor, igg, low affinity iib, Dusp15 - dual specificity phosphatase-like 15, Trf - transferrin, Tiam1 - t cell lymphoma invasion and metastasis 1, Fgd4 - fyve, rhogef and ph domain containing 4, P…
	GO:0010634	positive regulation of epithelial cell migration	0.000804	2.95	135	12	[Glipr2 - gli pathogenesis-related 2, Epb4.1l4b - erythrocyte protein band 4.1-like 4b, Vil1 - villin 1, Lgmn - legumain, Has2 - hyaluronan synthase 2, Igf1 - insulin-like growth factor 1, Vegfa - vascular endothelial growth factor a, Ptk2b - ptk2 protein tyrosine kinase 2 beta, Angpt1 - angiopoietin 1, Src - rous sarcoma oncogene, Adam9 - a disintegrin and metallopeptidase domain 9 (meltrin gamm…
	GO:2000027	regulation of organ morphogenesis	4.89e-05	2.93	204	18	[Ngfr - nerve growth factor receptor (tnfr superfamily, member 16), Ntn4 - netrin 4, Sfrp1 - secreted frizzled-related protein 1, Gdnf - glial cell line derived neurotrophic factor, Vegfa - vascular endothelial growth factor a, Vdr - vitamin d receptor, Wnt10a - wingless related mmtv integration site 10a, Pdgfa - platelet derived growth factor, alpha, Wnt11 - wingless-related mmtv integration sit…
	GO:0007613	memory	0.000915	2.91	137	12	[Glp1r - glucagon-like peptide 1 receptor, Cux2 - cut-like homeobox 2, Slc8a2 - solute carrier family 8 (sodium/calcium exchanger), member 2, Il1rn - interleukin 1 receptor antagonist, Cnr1 - cannabinoid receptor 1 (brain), Chst10 - carbohydrate sulfotransferase 10, Lgmn - legumain, Syt4 - synaptotagmin iv, Igf1 - insulin-like growth factor 1, Gpr110 - g protein-coupled receptor 110, Jph3 - junct…
	GO:0007611	learning or memory	3.46e-06	2.9	275	24	[Glp1r - glucagon-like peptide 1 receptor, Ephb2 - eph receptor b2, Dnah11 - dynein, axonemal, heavy chain 11, Slc8a2 - solute carrier family 8 (sodium/calcium exchanger), member 2, Adra1b - adrenergic receptor, alpha 1b, Dyx1c1 - dyslexia susceptibility 1 candidate 1 homolog (human), Ctnnd2 - catenin (cadherin associated protein), delta 2, Syt4 - synaptotagmin iv, Meis2 - meis homeobox 2, Sct - …
	GO:0007612	learning	0.000381	2.89	161	14	[Ephb2 - eph receptor b2, Glp1r - glucagon-like peptide 1 receptor, Slc8a2 - solute carrier family 8 (sodium/calcium exchanger), member 2, Adra1b - adrenergic receptor, alpha 1b, Ctnnd2 - catenin (cadherin associated protein), delta 2, Meis2 - meis homeobox 2, Sct - secretin, Pak1 - p21 protein (cdc42/rac)-activated kinase 1, Chst10 - carbohydrate sulfotransferase 10, Lgmn - legumain, Nrxn1 - neu…
	GO:0032946	positive regulation of mononuclear cell proliferation	0.000975	2.89	138	12	[Ccdc88b - coiled-coil domain containing 88b, Gpam - glycerol-3-phosphate acyltransferase, mitochondrial, Pycard - pyd and card domain containing, Aif1 - allograft inflammatory factor 1, Irs2 - insulin receptor substrate 2, Igf1 - insulin-like growth factor 1, Ptpn22 - protein tyrosine phosphatase, non-receptor type 22 (lymphoid), Cd163l1 - cd163 molecule-like 1, Rps3 - ribosomal protein s3, Cd20…
	GO:0010770	positive regulation of cell morphogenesis involved in differentiation	0.000263	2.86	174	15	[Ptprd - protein tyrosine phosphatase, receptor type, d, Fn1 - fibronectin 1, Snap91 - synaptosomal-associated protein 91, Tiam1 - t cell lymphoma invasion and metastasis 1, Vegfa - vascular endothelial growth factor a, Pak3 - p21 protein (cdc42/rac)-activated kinase 3, Zeb2 - zinc finger e-box binding homeobox 2, Pak1 - p21 protein (cdc42/rac)-activated kinase 1, Unc13d - unc-13 homolog d (c. el…
	GO:0043405	regulation of MAP kinase activity	3.07e-06	2.84	292	25	[Ern1 - endoplasmic reticulum (er) to nucleus signalling 1, Fzd10 - frizzled homolog 10 (drosophila), Trf - transferrin, Lpar1 - lysophosphatidic acid receptor 1, Vegfa - vascular endothelial growth factor a, Mst1r - macrophage stimulating 1 receptor (c-met-related tyrosine kinase), Fgd4 - fyve, rhogef and ph domain containing 4, Ptk2b - ptk2 protein tyrosine kinase 2 beta, Adam9 - a disintegrin …
	GO:0050770	regulation of axonogenesis	0.000124	2.82	200	17	[Ephb2 - eph receptor b2, Fn1 - fibronectin 1, Slit1 - slit homolog 1 (drosophila), Snap91 - synaptosomal-associated protein 91, Slit2 - slit homolog 2 (drosophila), Tiam1 - t cell lymphoma invasion and metastasis 1, Vegfa - vascular endothelial growth factor a, Cacna1a - calcium channel, voltage-dependent, p/q type, alpha 1a subunit, Sema4g - sema domain, immunoglobulin domain (ig), transmembran…
	GO:0010769	regulation of cell morphogenesis involved in differentiation	1.01e-06	2.81	331	28	[Fn1 - fibronectin 1, Snap91 - synaptosomal-associated protein 91, Vegfa - vascular endothelial growth factor a, Sema4g - sema domain, immunoglobulin domain (ig), transmembrane domain (tm) and short cytoplasmic domain, (semaphorin) 4g, Postn - periostin, osteoblast specific factor, Ust - uronyl-2-sulfotransferase, Nkx6-1 - nk6 homeobox 1, Cux2 - cut-like homeobox 2, Ache - acetylcholinesterase, S…
	GO:0031175	neuron projection development	4.15e-06	2.79	297	25	[Gdnf - glial cell line derived neurotrophic factor, Ush1g - usher syndrome 1g, Ptk2b - ptk2 protein tyrosine kinase 2 beta, Atcay - ataxia, cerebellar, cayman type homolog (human), Cnr1 - cannabinoid receptor 1 (brain), Flrt3 - fibronectin leucine rich transmembrane protein 3, Nrxn1 - neurexin i, Nrtn - neurturin, Cntn1 - contactin 1, Rtn4rl2 - reticulon 4 receptor-like 2, Ndn - necdin, Ephb2 - …
	GO:0032103	positive regulation of response to external stimulus	1.11e-05	2.78	275	23	[C3 - complement component 3, Ptger4 - prostaglandin e receptor 4 (subtype ep4), Fn1 - fibronectin 1, C5ar1 - complement component 5a receptor 1, Aif1 - allograft inflammatory factor 1, Slit2 - slit homolog 2 (drosophila), Ccl24 - chemokine (c-c motif) ligand 24, Lpar1 - lysophosphatidic acid receptor 1, Tiam1 - t cell lymphoma invasion and metastasis 1, Cyba - cytochrome b-245, alpha polypeptide…
	GO:0043271	negative regulation of ion transport	0.000552	2.78	167	14	[Ephb2 - eph receptor b2, Pawr - prkc, apoptosis, wt1, regulator, Ptk2b - ptk2 protein tyrosine kinase 2 beta, Mmp9 - matrix metallopeptidase 9, Prkg2 - protein kinase, cgmp-dependent, type ii, Il1rn - interleukin 1 receptor antagonist, Cnr1 - cannabinoid receptor 1 (brain), Best3 - bestrophin 3, Irs2 - insulin receptor substrate 2, Slc18a1 - solute carrier family 18 (vesicular monoamine), member…
	GO:0051272	positive regulation of cellular component movement	1.29e-09	2.77	528	44	[Ptger4 - prostaglandin e receptor 4 (subtype ep4), Vil1 - villin 1, Fn1 - fibronectin 1, Aif1 - allograft inflammatory factor 1, Ccl24 - chemokine (c-c motif) ligand 24, Itga2b - integrin alpha 2b, Trf - transferrin, Lpar1 - lysophosphatidic acid receptor 1, Vegfa - vascular endothelial growth factor a, Pawr - prkc, apoptosis, wt1, regulator, Lamc2 - laminin, gamma 2, Ptk2b - ptk2 protein tyrosi…
	GO:0043408	regulation of MAPK cascade	1.38e-12	2.75	724	60	[Ern1 - endoplasmic reticulum (er) to nucleus signalling 1, Errfi1 - erbb receptor feedback inhibitor 1, Fzd10 - frizzled homolog 10 (drosophila), Fn1 - fibronectin 1, Ppef2 - protein phosphatase, ef hand calcium-binding domain 2, Trf - transferrin, Lpar1 - lysophosphatidic acid receptor 1, Fgd4 - fyve, rhogef and ph domain containing 4, Mst1r - macrophage stimulating 1 receptor (c-met-related ty…
	GO:0032872	regulation of stress-activated MAPK cascade	0.000109	2.75	217	18	[Ern1 - endoplasmic reticulum (er) to nucleus signalling 1, Pycard - pyd and card domain containing, Fzd10 - frizzled homolog 10 (drosophila), Sfrp1 - secreted frizzled-related protein 1, Fcgr2b - fc receptor, igg, low affinity iib, Trf - transferrin, Dusp15 - dual specificity phosphatase-like 15, Tiam1 - t cell lymphoma invasion and metastasis 1, Vegfa - vascular endothelial growth factor a, Fgd…
	GO:1903039	positive regulation of leukocyte cell-cell adhesion	0.000259	2.75	193	16	[Gpam - glycerol-3-phosphate acyltransferase, mitochondrial, Pycard - pyd and card domain containing, Aif1 - allograft inflammatory factor 1, Sirpa - signal-regulatory protein alpha, Pawr - prkc, apoptosis, wt1, regulator, Ccdc88b - coiled-coil domain containing 88b, Socs1 - suppressor of cytokine signaling 1, Has2 - hyaluronan synthase 2, Igf1 - insulin-like growth factor 1, Cd163l1 - cd163 mole…
	GO:0040017	positive regulation of locomotion	1.05e-09	2.74	544	45	[Ptger4 - prostaglandin e receptor 4 (subtype ep4), Vil1 - villin 1, Fn1 - fibronectin 1, Aif1 - allograft inflammatory factor 1, Ccl24 - chemokine (c-c motif) ligand 24, Itga2b - integrin alpha 2b, Trf - transferrin, Lpar1 - lysophosphatidic acid receptor 1, Vegfa - vascular endothelial growth factor a, Pawr - prkc, apoptosis, wt1, regulator, Lamc2 - laminin, gamma 2, Ptk2b - ptk2 protein tyrosi…
	GO:0070302	regulation of stress-activated protein kinase signaling cascade	0.000115	2.74	218	18	[Ern1 - endoplasmic reticulum (er) to nucleus signalling 1, Pycard - pyd and card domain containing, Fzd10 - frizzled homolog 10 (drosophila), Sfrp1 - secreted frizzled-related protein 1, Fcgr2b - fc receptor, igg, low affinity iib, Trf - transferrin, Dusp15 - dual specificity phosphatase-like 15, Tiam1 - t cell lymphoma invasion and metastasis 1, Vegfa - vascular endothelial growth factor a, Fgd…
	GO:0050773	regulation of dendrite development	0.000477	2.71	184	15	[Ngfr - nerve growth factor receptor (tnfr superfamily, member 16), Ptprd - protein tyrosine phosphatase, receptor type, d, Tiam1 - t cell lymphoma invasion and metastasis 1, Lpar1 - lysophosphatidic acid receptor 1, Nlgn2 - neuroligin 2, Sarm1 - sterile alpha and heat/armadillo motif containing 1, Pak3 - p21 protein (cdc42/rac)-activated kinase 3, Arhgap44 - rho gtpase activating protein 44, Cux…
	GO:0043269	regulation of ion transport	2.71e-11	2.7	677	55	[Camk2a - calcium/calmodulin-dependent protein kinase ii alpha, Shisa6 - shisa homolog 6 (xenopus laevis), Trf - transferrin, Gdnf - glial cell line derived neurotrophic factor, Nlgn2 - neuroligin 2, Ptk2b - ptk2 protein tyrosine kinase 2 beta, Kcnj1 - potassium inwardly-rectifying channel, subfamily j, member 1, Kcna2 - potassium voltage-gated channel, shaker-related subfamily, member 2, Nrxn1 -…
	GO:0007267	cell-cell signaling	1.45e-07	2.68	434	35	[Shisa6 - shisa homolog 6 (xenopus laevis), Pcdh8 - protocadherin 8, Snap91 - synaptosomal-associated protein 91, Wnt10a - wingless related mmtv integration site 10a, Dlg2 - discs, large homolog 2 (drosophila), Wnt11 - wingless-related mmtv integration site 11, Cnr1 - cannabinoid receptor 1 (brain), Nrxn1 - neurexin i, P2rx2 - purinergic receptor p2x, ligand-gated ion channel, 2, Pdlim4 - pdz and…
	GO:0007169	transmembrane receptor protein tyrosine kinase signaling pathway	3.7e-06	2.68	334	27	[Vil1 - villin 1, Gdnf - glial cell line derived neurotrophic factor, Vegfa - vascular endothelial growth factor a, Mst1r - macrophage stimulating 1 receptor (c-met-related tyrosine kinase), Ptk2b - ptk2 protein tyrosine kinase 2 beta, Efna2 - ephrin a2, Myo1e - myosin ie, Tgfa - transforming growth factor alpha, Insrr - insulin receptor-related receptor, Flrt3 - fibronectin leucine rich transmem…
	GO:0045785	positive regulation of cell adhesion	9.17e-07	2.65	388	31	[Gpam - glycerol-3-phosphate acyltransferase, mitochondrial, Ptger4 - prostaglandin e receptor 4 (subtype ep4), Edil3 - egf-like repeats and discoidin i-like domains 3, Fn1 - fibronectin 1, Aif1 - allograft inflammatory factor 1, Vwc2 - von willebrand factor c domain containing 2, Vegfa - vascular endothelial growth factor a, Pawr - prkc, apoptosis, wt1, regulator, Ptk2b - ptk2 protein tyrosine k…
	GO:0071902	positive regulation of protein serine/threonine kinase activity	2.46e-05	2.64	289	23	[Ern1 - endoplasmic reticulum (er) to nucleus signalling 1, Adra2a - adrenergic receptor, alpha 2a, Fzd10 - frizzled homolog 10 (drosophila), Trf - transferrin, Lpar1 - lysophosphatidic acid receptor 1, Tiam1 - t cell lymphoma invasion and metastasis 1, Vegfa - vascular endothelial growth factor a, Fgd4 - fyve, rhogef and ph domain containing 4, Mst1r - macrophage stimulating 1 receptor (c-met-re…
	GO:1903531	negative regulation of secretion by cell	0.000279	2.64	214	17	[Ptger4 - prostaglandin e receptor 4 (subtype ep4), Adra2a - adrenergic receptor, alpha 2a, Il13ra2 - interleukin 13 receptor, alpha 2, Fn1 - fibronectin 1, Sfrp1 - secreted frizzled-related protein 1, Syt4 - synaptotagmin iv, C5ar2 - complement component 5a receptor 2, Bmp8a - bone morphogenetic protein 8a, Il1rn - interleukin 1 receptor antagonist, Cnr1 - cannabinoid receptor 1 (brain), Il33 - …
	GO:0045766	positive regulation of angiogenesis	0.000978	2.62	177	14	[C3 - complement component 3, C5ar1 - complement component 5a receptor 1, Cyp1b1 - cytochrome p450, family 1, subfamily b, polypeptide 1, Hc - hemolytic complement, Ccl24 - chemokine (c-c motif) ligand 24, Jak1 - janus kinase 1, Gata6 - gata binding protein 6, Psg22 - pregnancy-specific glycoprotein 22, Vegfa - vascular endothelial growth factor a, Gata4 - gata binding protein 4, Ptk2b - ptk2 pro…
	GO:1903530	regulation of secretion by cell	1.92e-11	2.61	751	59	[Gpam - glycerol-3-phosphate acyltransferase, mitochondrial, Ptger4 - prostaglandin e receptor 4 (subtype ep4), Camk2a - calcium/calmodulin-dependent protein kinase ii alpha, Il13ra2 - interleukin 13 receptor, alpha 2, Fn1 - fibronectin 1, Nlgn2 - neuroligin 2, Postn - periostin, osteoblast specific factor, Kcna2 - potassium voltage-gated channel, shaker-related subfamily, member 2, Nrxn1 - neure…
	GO:0050890	cognition	2.09e-05	2.6	306	24	[Glp1r - glucagon-like peptide 1 receptor, Ephb2 - eph receptor b2, Dnah11 - dynein, axonemal, heavy chain 11, Slc8a2 - solute carrier family 8 (sodium/calcium exchanger), member 2, Adra1b - adrenergic receptor, alpha 1b, Dyx1c1 - dyslexia susceptibility 1 candidate 1 homolog (human), Ctnnd2 - catenin (cadherin associated protein), delta 2, Syt4 - synaptotagmin iv, Meis2 - meis homeobox 2, Sct - …
	GO:0050679	positive regulation of epithelial cell proliferation	0.000785	2.58	193	15	[C5ar1 - complement component 5a receptor 1, Sfrp1 - secreted frizzled-related protein 1, Ccl24 - chemokine (c-c motif) ligand 24, C5ar2 - complement component 5a receptor 2, Cyba - cytochrome b-245, alpha polypeptide, Vegfa - vascular endothelial growth factor a, Fzd7 - frizzled homolog 7 (drosophila), Eya1 - eyes absent 1 homolog (drosophila), Tgfa - transforming growth factor alpha, Has2 - hya…
	GO:0023052	signaling	1.68e-07	2.54	497	38	[Shisa6 - shisa homolog 6 (xenopus laevis), Pcdh8 - protocadherin 8, Snap91 - synaptosomal-associated protein 91, Wnt10a - wingless related mmtv integration site 10a, Dlg2 - discs, large homolog 2 (drosophila), Wnt11 - wingless-related mmtv integration site 11, Cnr1 - cannabinoid receptor 1 (brain), P2rx2 - purinergic receptor p2x, ligand-gated ion channel, 2, Nrxn1 - neurexin i, Pdlim4 - pdz and…
	GO:0050714	positive regulation of protein secretion	9.88e-05	2.53	275	21	[Glp1r - glucagon-like peptide 1 receptor, Ptger4 - prostaglandin e receptor 4 (subtype ep4), Pycard - pyd and card domain containing, Clec4e - c-type lectin domain family 4, member e, Hc - hemolytic complement, Psg22 - pregnancy-specific glycoprotein 22, Nlgn2 - neuroligin 2, Clec9a - c-type lectin domain family 9, member a, Adam9 - a disintegrin and metallopeptidase domain 9 (meltrin gamma), Il…
	GO:0050730	regulation of peptidyl-tyrosine phosphorylation	0.000211	2.53	249	19	[Ptger4 - prostaglandin e receptor 4 (subtype ep4), Adra2a - adrenergic receptor, alpha 2a, Errfi1 - erbb receptor feedback inhibitor 1, Sfrp1 - secreted frizzled-related protein 1, Gdnf - glial cell line derived neurotrophic factor, Vegfa - vascular endothelial growth factor a, Pdgfa - platelet derived growth factor, alpha, Ptk2b - ptk2 protein tyrosine kinase 2 beta, Tgfa - transforming growth …
	GO:0050708	regulation of protein secretion	8.46e-07	2.52	447	34	[Glp1r - glucagon-like peptide 1 receptor, Gpam - glycerol-3-phosphate acyltransferase, mitochondrial, Ptger4 - prostaglandin e receptor 4 (subtype ep4), Fn1 - fibronectin 1, C5ar2 - complement component 5a receptor 2, Psg22 - pregnancy-specific glycoprotein 22, Nlgn2 - neuroligin 2, Adam9 - a disintegrin and metallopeptidase domain 9 (meltrin gamma), Il1rl1 - interleukin 1 receptor-like 1, Postn…
	GO:0010466	negative regulation of peptidase activity	0.000341	2.51	238	18	[A2m - alpha-2-macroglobulin, Serpina11 - serine (or cysteine) peptidase inhibitor, clade a (alpha-1 antiproteinase, antitrypsin), member 11, Vegfa - vascular endothelial growth factor a, Cryaa - crystallin, alpha a, Mmp9 - matrix metallopeptidase 9, Spock1 - sparc/osteonectin, cwcv and kazal-like domains proteoglycan 1, Serpinb11 - serine (or cysteine) peptidase inhibitor, clade b (ovalbumin), m…
	GO:0022603	regulation of anatomical structure morphogenesis	4.58e-14	2.5	1047	79	[Cd59a - cd59a antigen, Ptger4 - prostaglandin e receptor 4 (subtype ep4), Fn1 - fibronectin 1, Gdnf - glial cell line derived neurotrophic factor, Jak1 - janus kinase 1, Lpar1 - lysophosphatidic acid receptor 1, Fgd4 - fyve, rhogef and ph domain containing 4, Wnt10a - wingless related mmtv integration site 10a, Ptk2b - ptk2 protein tyrosine kinase 2 beta, Wnt11 - wingless-related mmtv integratio…
	GO:0044089	positive regulation of cellular component biogenesis	2.39e-07	2.5	504	38	[Vil1 - villin 1, Irf8 - interferon regulatory factor 8, Cebpa - ccaat/enhancer binding protein (c/ebp), alpha, Snap91 - synaptosomal-associated protein 91, Ccl24 - chemokine (c-c motif) ligand 24, Lpar1 - lysophosphatidic acid receptor 1, Nlgn2 - neuroligin 2, Vegfa - vascular endothelial growth factor a, Ptk2b - ptk2 protein tyrosine kinase 2 beta, Wnt11 - wingless-related mmtv integration site…
	GO:1901215	negative regulation of neuron death	0.000525	2.5	226	17	[Glp1r - glucagon-like peptide 1 receptor, Ngfr - nerve growth factor receptor (tnfr superfamily, member 16), C5ar1 - complement component 5a receptor 1, Gdnf - glial cell line derived neurotrophic factor, Ccl12 - chemokine (c-c motif) ligand 12, Sct - secretin, Vegfa - vascular endothelial growth factor a, Reg3b - regenerating islet-derived 3 beta, Ptk2b - ptk2 protein tyrosine kinase 2 beta, Ca…
	GO:0051046	regulation of secretion	4.47e-11	2.48	829	62	[Gpam - glycerol-3-phosphate acyltransferase, mitochondrial, Camk2a - calcium/calmodulin-dependent protein kinase ii alpha, Ptger4 - prostaglandin e receptor 4 (subtype ep4), Il13ra2 - interleukin 13 receptor, alpha 2, Fn1 - fibronectin 1, Nlgn2 - neuroligin 2, Postn - periostin, osteoblast specific factor, Kcna2 - potassium voltage-gated channel, shaker-related subfamily, member 2, Nrxn1 - neure…
	GO:0022604	regulation of cell morphogenesis	3.06e-07	2.48	509	38	[Vil1 - villin 1, Fn1 - fibronectin 1, Snap91 - synaptosomal-associated protein 91, Ccl24 - chemokine (c-c motif) ligand 24, Lpar1 - lysophosphatidic acid receptor 1, Vegfa - vascular endothelial growth factor a, Fgd4 - fyve, rhogef and ph domain containing 4, Ptk2b - ptk2 protein tyrosine kinase 2 beta, Sema4g - sema domain, immunoglobulin domain (ig), transmembrane domain (tm) and short cytopla…
	GO:0051048	negative regulation of secretion	0.000397	2.48	241	18	[Ptger4 - prostaglandin e receptor 4 (subtype ep4), Adra2a - adrenergic receptor, alpha 2a, Il13ra2 - interleukin 13 receptor, alpha 2, Fn1 - fibronectin 1, Sfrp1 - secreted frizzled-related protein 1, Syt4 - synaptotagmin iv, C5ar2 - complement component 5a receptor 2, Sct - secretin, Bmp8a - bone morphogenetic protein 8a, Cnr1 - cannabinoid receptor 1 (brain), Il1rn - interleukin 1 receptor ant…
	GO:0010976	positive regulation of neuron projection development	2.35e-05	2.47	349	26	[Fn1 - fibronectin 1, Snap91 - synaptosomal-associated protein 91, Lpar1 - lysophosphatidic acid receptor 1, Nlgn2 - neuroligin 2, Vegfa - vascular endothelial growth factor a, Ptk2b - ptk2 protein tyrosine kinase 2 beta, Pcp4 - purkinje cell protein 4, Cux2 - cut-like homeobox 2, Cnr1 - cannabinoid receptor 1 (brain), Ache - acetylcholinesterase, Cntn1 - contactin 1, Stau2 - staufen (rna binding…
	GO:0002791	regulation of peptide secretion	7.21e-07	2.46	485	36	[Glp1r - glucagon-like peptide 1 receptor, Gpam - glycerol-3-phosphate acyltransferase, mitochondrial, Ptger4 - prostaglandin e receptor 4 (subtype ep4), Fn1 - fibronectin 1, C5ar2 - complement component 5a receptor 2, Psg22 - pregnancy-specific glycoprotein 22, Nlgn2 - neuroligin 2, Adam9 - a disintegrin and metallopeptidase domain 9 (meltrin gamma), Il1rl1 - interleukin 1 receptor-like 1, Postn…
	GO:0048729	tissue morphogenesis	2.97e-06	2.46	431	32	[Col12a1 - collagen, type xii, alpha 1, Myom2 - myomesin 2, Col14a1 - collagen, type xiv, alpha 1, Pcdh8 - protocadherin 8, Gdnf - glial cell line derived neurotrophic factor, Vegfa - vascular endothelial growth factor a, Vdr - vitamin d receptor, Wnt10a - wingless related mmtv integration site 10a, Wnt11 - wingless-related mmtv integration site 11, Car9 - carbonic anhydrase 9, Wnt6 - wingless-re…
	GO:0000902	cell morphogenesis	0.0003	2.46	256	19	[Ephb2 - eph receptor b2, Col12a1 - collagen, type xii, alpha 1, Col14a1 - collagen, type xiv, alpha 1, Fn1 - fibronectin 1, Sfrp1 - secreted frizzled-related protein 1, Lect1 - leukocyte cell derived chemotaxin 1, Esrrb - estrogen related receptor, beta, Fzd7 - frizzled homolog 7 (drosophila), Vpreb2 - pre-b lymphocyte gene 2, Vdr - vitamin d receptor, Map7 - microtubule-associated protein 7, Cr…
	GO:0035239	tube morphogenesis	7.64e-05	2.45	311	23	[Ptger4 - prostaglandin e receptor 4 (subtype ep4), Cyp1b1 - cytochrome p450, family 1, subfamily b, polypeptide 1, Sfrp1 - secreted frizzled-related protein 1, Slit2 - slit homolog 2 (drosophila), Gdnf - glial cell line derived neurotrophic factor, Gata6 - gata binding protein 6, Hpgd - hydroxyprostaglandin dehydrogenase 15 (nad), Vegfa - vascular endothelial growth factor a, Vdr - vitamin d rec…
	GO:0007204	positive regulation of cytosolic calcium ion concentration	0.000163	2.45	285	21	[Glp1r - glucagon-like peptide 1 receptor, Ptger4 - prostaglandin e receptor 4 (subtype ep4), Adra1b - adrenergic receptor, alpha 1b, Slc8a2 - solute carrier family 8 (sodium/calcium exchanger), member 2, C5ar1 - complement component 5a receptor 1, Htr2c - 5-hydroxytryptamine (serotonin) receptor 2c, C5ar2 - complement component 5a receptor 2, Lpar1 - lysophosphatidic acid receptor 1, Pawr - prkc…
	GO:0052548	regulation of endopeptidase activity	5.77e-05	2.44	326	24	[Ngfr - nerve growth factor receptor (tnfr superfamily, member 16), Pycard - pyd and card domain containing, Serpina11 - serine (or cysteine) peptidase inhibitor, clade a (alpha-1 antiproteinase, antitrypsin), member 11, Vegfa - vascular endothelial growth factor a, Pawr - prkc, apoptosis, wt1, regulator, Cryaa - crystallin, alpha a, Mmp9 - matrix metallopeptidase 9, Spock1 - sparc/osteonectin, c…
	GO:0051924	regulation of calcium ion transport	0.00033	2.44	258	19	[Glp1r - glucagon-like peptide 1 receptor, Camk2a - calcium/calmodulin-dependent protein kinase ii alpha, Ccl12 - chemokine (c-c motif) ligand 12, Cyba - cytochrome b-245, alpha polypeptide, Pawr - prkc, apoptosis, wt1, regulator, Vdr - vitamin d receptor, Ptk2b - ptk2 protein tyrosine kinase 2 beta, Cacna1a - calcium channel, voltage-dependent, p/q type, alpha 1a subunit, Cacna1b - calcium chann…
	GO:0051962	positive regulation of nervous system development	4.64e-08	2.42	616	45	[Fn1 - fibronectin 1, Snap91 - synaptosomal-associated protein 91, Trf - transferrin, Lpar1 - lysophosphatidic acid receptor 1, Vwc2 - von willebrand factor c domain containing 2, Nlgn2 - neuroligin 2, Vegfa - vascular endothelial growth factor a, Ptk2b - ptk2 protein tyrosine kinase 2 beta, Pcp4 - purkinje cell protein 4, Cux2 - cut-like homeobox 2, Nkx6-1 - nk6 homeobox 1, Cnr1 - cannabinoid re…
	GO:0050804	modulation of chemical synaptic transmission	2.82e-07	2.42	549	40	[Ptger4 - prostaglandin e receptor 4 (subtype ep4), Camk2a - calcium/calmodulin-dependent protein kinase ii alpha, Shisa6 - shisa homolog 6 (xenopus laevis), Slc8a2 - solute carrier family 8 (sodium/calcium exchanger), member 2, Gdnf - glial cell line derived neurotrophic factor, Nlgn2 - neuroligin 2, Ptk2b - ptk2 protein tyrosine kinase 2 beta, Cux2 - cut-like homeobox 2, Cnr1 - cannabinoid rece…
	GO:0009887	animal organ morphogenesis	3.93e-07	2.42	535	39	[Col12a1 - collagen, type xii, alpha 1, Col14a1 - collagen, type xiv, alpha 1, Errfi1 - erbb receptor feedback inhibitor 1, Edaradd - edar (ectodysplasin-a receptor)-associated death domain, Vegfa - vascular endothelial growth factor a, Sp5 - trans-acting transcription factor 5, Vdr - vitamin d receptor, Wnt10a - wingless related mmtv integration site 10a, Wnt11 - wingless-related mmtv integratio…
	GO:0099177	regulation of trans-synaptic signaling	2.95e-07	2.41	550	40	[Ptger4 - prostaglandin e receptor 4 (subtype ep4), Camk2a - calcium/calmodulin-dependent protein kinase ii alpha, Shisa6 - shisa homolog 6 (xenopus laevis), Slc8a2 - solute carrier family 8 (sodium/calcium exchanger), member 2, Gdnf - glial cell line derived neurotrophic factor, Nlgn2 - neuroligin 2, Ptk2b - ptk2 protein tyrosine kinase 2 beta, Cux2 - cut-like homeobox 2, Cnr1 - cannabinoid rece…
	GO:0002009	morphogenesis of an epithelium	6.99e-05	2.41	330	24	[Pcdh15 - protocadherin 15, Aldh1a3 - aldehyde dehydrogenase family 1, subfamily a3, Pcdh8 - protocadherin 8, Sfrp1 - secreted frizzled-related protein 1, Slit2 - slit homolog 2 (drosophila), Gdnf - glial cell line derived neurotrophic factor, Vegfa - vascular endothelial growth factor a, Vdr - vitamin d receptor, Gata4 - gata binding protein 4, Wnt10a - wingless related mmtv integration site 10a…
	GO:0002793	positive regulation of peptide secretion	0.000142	2.41	303	22	[Glp1r - glucagon-like peptide 1 receptor, Ptger4 - prostaglandin e receptor 4 (subtype ep4), Pycard - pyd and card domain containing, Clec4e - c-type lectin domain family 4, member e, Hc - hemolytic complement, Psg22 - pregnancy-specific glycoprotein 22, Sct - secretin, Nlgn2 - neuroligin 2, Clec9a - c-type lectin domain family 9, member a, Adam9 - a disintegrin and metallopeptidase domain 9 (me…
	GO:0120039	plasma membrane bounded cell projection morphogenesis	0.0004	2.41	262	19	[Ephb2 - eph receptor b2, Camk2a - calcium/calmodulin-dependent protein kinase ii alpha, Myo16 - myosin xvi, Dcc - deleted in colorectal carcinoma, Ctnnd2 - catenin (cadherin associated protein), delta 2, Slit1 - slit homolog 1 (drosophila), Snap91 - synaptosomal-associated protein 91, Slit2 - slit homolog 2 (drosophila), Slitrk5 - slit and ntrk-like family, member 5, Cacna1a - calcium channel, v…
	GO:0001934	positive regulation of protein phosphorylation	1.27e-11	2.39	972	70	[Ptger4 - prostaglandin e receptor 4 (subtype ep4), Ern1 - endoplasmic reticulum (er) to nucleus signalling 1, Fzd10 - frizzled homolog 10 (drosophila), Aif1 - allograft inflammatory factor 1, Gdnf - glial cell line derived neurotrophic factor, Trf - transferrin, Lpar1 - lysophosphatidic acid receptor 1, Mst1r - macrophage stimulating 1 receptor (c-met-related tyrosine kinase), Fgd4 - fyve, rhoge…
	GO:0099536	synaptic signaling	0.00044	2.39	264	19	[Ephb2 - eph receptor b2, Syp - synaptophysin, Shisa6 - shisa homolog 6 (xenopus laevis), Snap91 - synaptosomal-associated protein 91, Pcdh8 - protocadherin 8, Htr2c - 5-hydroxytryptamine (serotonin) receptor 2c, Slitrk5 - slit and ntrk-like family, member 5, Dlg2 - discs, large homolog 2 (drosophila), Cacna1a - calcium channel, voltage-dependent, p/q type, alpha 1a subunit, Sv2b - synaptic vesic…
	GO:0099537	trans-synaptic signaling	0.00044	2.39	264	19	[Ephb2 - eph receptor b2, Syp - synaptophysin, Shisa6 - shisa homolog 6 (xenopus laevis), Snap91 - synaptosomal-associated protein 91, Pcdh8 - protocadherin 8, Htr2c - 5-hydroxytryptamine (serotonin) receptor 2c, Slitrk5 - slit and ntrk-like family, member 5, Dlg2 - discs, large homolog 2 (drosophila), Cacna1a - calcium channel, voltage-dependent, p/q type, alpha 1a subunit, Sv2b - synaptic vesic…
	GO:0043523	regulation of neuron apoptotic process	0.000613	2.39	250	18	[Glp1r - glucagon-like peptide 1 receptor, Ngfr - nerve growth factor receptor (tnfr superfamily, member 16), C5ar1 - complement component 5a receptor 1, Gdnf - glial cell line derived neurotrophic factor, Ccl12 - chemokine (c-c motif) ligand 12, Sct - secretin, Vegfa - vascular endothelial growth factor a, Reg3b - regenerating islet-derived 3 beta, Pawr - prkc, apoptosis, wt1, regulator, Ptk2b -…
	GO:0007167	enzyme linked receptor protein signaling pathway	1.54e-06	2.38	501	36	[Vil1 - villin 1, Gdnf - glial cell line derived neurotrophic factor, Jak1 - janus kinase 1, Vegfa - vascular endothelial growth factor a, Mst1r - macrophage stimulating 1 receptor (c-met-related tyrosine kinase), Ptk2b - ptk2 protein tyrosine kinase 2 beta, Efna2 - ephrin a2, Adam9 - a disintegrin and metallopeptidase domain 9 (meltrin gamma), Myo1e - myosin ie, Tgfa - transforming growth factor…
	GO:0001525	angiogenesis	0.000483	2.37	266	19	[Ephb2 - eph receptor b2, Meox2 - mesenchyme homeobox 2, Fn1 - fibronectin 1, Cyp1b1 - cytochrome p450, family 1, subfamily b, polypeptide 1, Ccl12 - chemokine (c-c motif) ligand 12, Psg22 - pregnancy-specific glycoprotein 22, Vegfa - vascular endothelial growth factor a, Pdgfa - platelet derived growth factor, alpha, Ptk2b - ptk2 protein tyrosine kinase 2 beta, Hpse - heparanase, Ramp1 - recepto…
	GO:0048858	cell projection morphogenesis	0.000483	2.37	266	19	[Ephb2 - eph receptor b2, Camk2a - calcium/calmodulin-dependent protein kinase ii alpha, Myo16 - myosin xvi, Ctnnd2 - catenin (cadherin associated protein), delta 2, Dcc - deleted in colorectal carcinoma, Slit1 - slit homolog 1 (drosophila), Snap91 - synaptosomal-associated protein 91, Slit2 - slit homolog 2 (drosophila), Slitrk5 - slit and ntrk-like family, member 5, Cacna1a - calcium channel, v…
	GO:0032147	activation of protein kinase activity	0.000938	2.37	238	17	[Adra2a - adrenergic receptor, alpha 2a, Ern1 - endoplasmic reticulum (er) to nucleus signalling 1, Trf - transferrin, Lpar1 - lysophosphatidic acid receptor 1, Vegfa - vascular endothelial growth factor a, Fgd4 - fyve, rhogef and ph domain containing 4, Ptk2b - ptk2 protein tyrosine kinase 2 beta, Adam9 - a disintegrin and metallopeptidase domain 9 (meltrin gamma), Tgfa - transforming growth fac…
	GO:0034765	regulation of ion transmembrane transport	7.25e-06	2.36	450	32	[Shisa6 - shisa homolog 6 (xenopus laevis), Nlgn2 - neuroligin 2, Hcn1 - hyperpolarization-activated, cyclic nucleotide-gated k+ 1, Ptk2b - ptk2 protein tyrosine kinase 2 beta, Kcnj1 - potassium inwardly-rectifying channel, subfamily j, member 1, Kcna2 - potassium voltage-gated channel, shaker-related subfamily, member 2, Nrxn1 - neurexin i, Cxcl10 - chemokine (c-x-c motif) ligand 10, Cacng4 - ca…
	GO:0010975	regulation of neuron projection development	4.43e-07	2.35	580	41	[Fn1 - fibronectin 1, Snap91 - synaptosomal-associated protein 91, Lpar1 - lysophosphatidic acid receptor 1, Nlgn2 - neuroligin 2, Vegfa - vascular endothelial growth factor a, Ptk2b - ptk2 protein tyrosine kinase 2 beta, Sema4g - sema domain, immunoglobulin domain (ig), transmembrane domain (tm) and short cytoplasmic domain, (semaphorin) 4g, Pcp4 - purkinje cell protein 4, Ust - uronyl-2-sulfotr…
	GO:0032956	regulation of actin cytoskeleton organization	0.000106	2.35	339	24	[Vil1 - villin 1, Ptger4 - prostaglandin e receptor 4 (subtype ep4), Pycard - pyd and card domain containing, Fzd10 - frizzled homolog 10 (drosophila), Slit2 - slit homolog 2 (drosophila), Ccl24 - chemokine (c-c motif) ligand 24, Lpar1 - lysophosphatidic acid receptor 1, Ptk2b - ptk2 protein tyrosine kinase 2 beta, Wnt11 - wingless-related mmtv integration site 11, Pak3 - p21 protein (cdc42/rac)-…
	GO:0042327	positive regulation of phosphorylation	1.67e-11	2.34	1021	72	[Ptger4 - prostaglandin e receptor 4 (subtype ep4), Ern1 - endoplasmic reticulum (er) to nucleus signalling 1, Fzd10 - frizzled homolog 10 (drosophila), Aif1 - allograft inflammatory factor 1, Gdnf - glial cell line derived neurotrophic factor, Trf - transferrin, Lpar1 - lysophosphatidic acid receptor 1, Esrrb - estrogen related receptor, beta, Mst1r - macrophage stimulating 1 receptor (c-met-rel…
	GO:1903532	positive regulation of secretion by cell	1.16e-05	2.34	439	31	[Glp1r - glucagon-like peptide 1 receptor, Ptger4 - prostaglandin e receptor 4 (subtype ep4), Cadps - ca2+-dependent secretion activator, Psg22 - pregnancy-specific glycoprotein 22, Nlgn2 - neuroligin 2, Adam9 - a disintegrin and metallopeptidase domain 9 (meltrin gamma), Pcp4 - purkinje cell protein 4, Il1rl1 - interleukin 1 receptor-like 1, Postn - periostin, osteoblast specific factor, Avpr1a …
	GO:0098662	inorganic cation transmembrane transport	3.1e-05	2.34	397	28	[Glp1r - glucagon-like peptide 1 receptor, Slc8a2 - solute carrier family 8 (sodium/calcium exchanger), member 2, Slc46a1 - solute carrier family 46, member 1, Pawr - prkc, apoptosis, wt1, regulator, Hcn1 - hyperpolarization-activated, cyclic nucleotide-gated k+ 1, Steap1 - six transmembrane epithelial antigen of the prostate 1, Kcnj1 - potassium inwardly-rectifying channel, subfamily j, member 1…
	GO:0007162	negative regulation of cell adhesion	0.000554	2.34	269	19	[Mfi2 - antigen p97 (melanoma associated) identified by monoclonal antibodies 133.2 and 96.5, Cyp1b1 - cytochrome p450, family 1, subfamily b, polypeptide 1, Vegfa - vascular endothelial growth factor a, Clec4g - c-type lectin domain family 4, member g, Fzd7 - frizzled homolog 7 (drosophila), Pawr - prkc, apoptosis, wt1, regulator, Postn - periostin, osteoblast specific factor, Spock1 - sparc/ost…
	GO:0032989	cellular component morphogenesis	1.82e-06	2.33	526	37	[Col12a1 - collagen, type xii, alpha 1, Camk2a - calcium/calmodulin-dependent protein kinase ii alpha, Col14a1 - collagen, type xiv, alpha 1, Myo16 - myosin xvi, Fn1 - fibronectin 1, Snap91 - synaptosomal-associated protein 91, Esrrb - estrogen related receptor, beta, Vdr - vitamin d receptor, Fermt3 - fermitin family homolog 3 (drosophila), Gp1ba - glycoprotein 1b, alpha polypeptide, Lrp2 - low …
	GO:0048812	neuron projection morphogenesis	0.000807	2.33	256	18	[Ephb2 - eph receptor b2, Camk2a - calcium/calmodulin-dependent protein kinase ii alpha, Myo16 - myosin xvi, Dcc - deleted in colorectal carcinoma, Ctnnd2 - catenin (cadherin associated protein), delta 2, Slit1 - slit homolog 1 (drosophila), Snap91 - synaptosomal-associated protein 91, Slit2 - slit homolog 2 (drosophila), Slitrk5 - slit and ntrk-like family, member 5, Cacna1a - calcium channel, v…
	GO:1901214	regulation of neuron death	0.000139	2.31	345	24	[Glp1r - glucagon-like peptide 1 receptor, Ngfr - nerve growth factor receptor (tnfr superfamily, member 16), Dcc - deleted in colorectal carcinoma, C5ar1 - complement component 5a receptor 1, Fcgr2b - fc receptor, igg, low affinity iib, Gdnf - glial cell line derived neurotrophic factor, Ccl12 - chemokine (c-c motif) ligand 12, Sct - secretin, Vegfa - vascular endothelial growth factor a, Reg3b …
	GO:2000145	regulation of cell motility	1.75e-09	2.3	865	60	[Ptger4 - prostaglandin e receptor 4 (subtype ep4), Fn1 - fibronectin 1, Unc5c - unc-5 homolog c (c. elegans), Aif1 - allograft inflammatory factor 1, Trf - transferrin, Lpar1 - lysophosphatidic acid receptor 1, Ptk2b - ptk2 protein tyrosine kinase 2 beta, Wnt11 - wingless-related mmtv integration site 11, Postn - periostin, osteoblast specific factor, Wnt5b - wingless-related mmtv integration si…
	GO:0051346	negative regulation of hydrolase activity	5.88e-05	2.3	390	27	[Fzd10 - frizzled homolog 10 (drosophila), Snap91 - synaptosomal-associated protein 91, Vegfa - vascular endothelial growth factor a, Dlg2 - discs, large homolog 2 (drosophila), Spock3 - sparc/osteonectin, cwcv and kazal-like domains proteoglycan 3, Serpinb11 - serine (or cysteine) peptidase inhibitor, clade b (ovalbumin), member 11, Serpina3n - serine (or cysteine) peptidase inhibitor, clade a, …
	GO:0010562	positive regulation of phosphorus metabolic process	1.87e-11	2.29	1089	75	[Ptger4 - prostaglandin e receptor 4 (subtype ep4), Ern1 - endoplasmic reticulum (er) to nucleus signalling 1, Fzd10 - frizzled homolog 10 (drosophila), Aif1 - allograft inflammatory factor 1, Gdnf - glial cell line derived neurotrophic factor, Trf - transferrin, Lpar1 - lysophosphatidic acid receptor 1, Esrrb - estrogen related receptor, beta, Mst1r - macrophage stimulating 1 receptor (c-met-rel…
	GO:0045937	positive regulation of phosphate metabolic process	1.87e-11	2.29	1089	75	[Ptger4 - prostaglandin e receptor 4 (subtype ep4), Ern1 - endoplasmic reticulum (er) to nucleus signalling 1, Fzd10 - frizzled homolog 10 (drosophila), Aif1 - allograft inflammatory factor 1, Gdnf - glial cell line derived neurotrophic factor, Trf - transferrin, Lpar1 - lysophosphatidic acid receptor 1, Esrrb - estrogen related receptor, beta, Mst1r - macrophage stimulating 1 receptor (c-met-rel…
	GO:0051047	positive regulation of secretion	7.28e-06	2.29	493	34	[Glp1r - glucagon-like peptide 1 receptor, Ptger4 - prostaglandin e receptor 4 (subtype ep4), Cadps - ca2+-dependent secretion activator, Psg22 - pregnancy-specific glycoprotein 22, Nlgn2 - neuroligin 2, Adam9 - a disintegrin and metallopeptidase domain 9 (meltrin gamma), Pcp4 - purkinje cell protein 4, Il1rl1 - interleukin 1 receptor-like 1, Postn - periostin, osteoblast specific factor, Avpr1a …
	GO:0098655	cation transmembrane transport	3.62e-05	2.28	422	29	[Glp1r - glucagon-like peptide 1 receptor, Slc8a2 - solute carrier family 8 (sodium/calcium exchanger), member 2, Slc46a1 - solute carrier family 46, member 1, Hcn1 - hyperpolarization-activated, cyclic nucleotide-gated k+ 1, Pawr - prkc, apoptosis, wt1, regulator, Steap1 - six transmembrane epithelial antigen of the prostate 1, Kcnj1 - potassium inwardly-rectifying channel, subfamily j, member 1…
	GO:0007610	behavior	4.27e-07	2.27	644	44	[Glp1r - glucagon-like peptide 1 receptor, Npas3 - neuronal pas domain protein 3, Dnah11 - dynein, axonemal, heavy chain 11, Slc8a2 - solute carrier family 8 (sodium/calcium exchanger), member 2, Meis2 - meis homeobox 2, Nlgn2 - neuroligin 2, Lsamp - limbic system-associated membrane protein, Avpr1a - arginine vasopressin receptor 1a, Cux2 - cut-like homeobox 2, Cnr1 - cannabinoid receptor 1 (bra…
	GO:0032970	regulation of actin filament-based process	9.71e-05	2.27	380	26	[Ptger4 - prostaglandin e receptor 4 (subtype ep4), Vil1 - villin 1, Fzd10 - frizzled homolog 10 (drosophila), Ccl24 - chemokine (c-c motif) ligand 24, Lpar1 - lysophosphatidic acid receptor 1, Ptk2b - ptk2 protein tyrosine kinase 2 beta, Wnt11 - wingless-related mmtv integration site 11, Pdlim4 - pdz and lim domain 4, Arhgef10l - rho guanine nucleotide exchange factor (gef) 10-like, Stau2 - stau…
	GO:0046883	regulation of hormone secretion	0.000617	2.27	293	20	[Glp1r - glucagon-like peptide 1 receptor, Scg5 - secretogranin v, Ptger4 - prostaglandin e receptor 4 (subtype ep4), Adra2a - adrenergic receptor, alpha 2a, Sfrp1 - secreted frizzled-related protein 1, Htr2c - 5-hydroxytryptamine (serotonin) receptor 2c, Sct - secretin, Tiam1 - t cell lymphoma invasion and metastasis 1, Nlgn2 - neuroligin 2, Cacna1a - calcium channel, voltage-dependent, p/q type…
	GO:0071900	regulation of protein serine/threonine kinase activity	4.29e-05	2.26	426	29	[Ern1 - endoplasmic reticulum (er) to nucleus signalling 1, Fzd10 - frizzled homolog 10 (drosophila), Trf - transferrin, Lpar1 - lysophosphatidic acid receptor 1, Vegfa - vascular endothelial growth factor a, Fgd4 - fyve, rhogef and ph domain containing 4, Mst1r - macrophage stimulating 1 receptor (c-met-related tyrosine kinase), Ptk2b - ptk2 protein tyrosine kinase 2 beta, Adam9 - a disintegrin …
	GO:0051270	regulation of cellular component movement	1.26e-09	2.25	945	64	[Ptger4 - prostaglandin e receptor 4 (subtype ep4), Fn1 - fibronectin 1, Unc5c - unc-5 homolog c (c. elegans), Aif1 - allograft inflammatory factor 1, Trf - transferrin, Lpar1 - lysophosphatidic acid receptor 1, Ptk2b - ptk2 protein tyrosine kinase 2 beta, Wnt11 - wingless-related mmtv integration site 11, Postn - periostin, osteoblast specific factor, Wnt5b - wingless-related mmtv integration si…
	GO:0120035	regulation of plasma membrane bounded cell projection organization	8.84e-08	2.25	738	50	[Fn1 - fibronectin 1, Lpar1 - lysophosphatidic acid receptor 1, Nlgn2 - neuroligin 2, Ptk2b - ptk2 protein tyrosine kinase 2 beta, Ache - acetylcholinesterase, Nrxn1 - neurexin i, Sdk1 - sidekick homolog 1 (chicken), Rtn4rl2 - reticulon 4 receptor-like 2, Stau2 - staufen (rna binding protein) homolog 2 (drosophila), Il1rapl1 - interleukin 1 receptor accessory protein-like 1, Ephb2 - eph receptor …
	GO:0034762	regulation of transmembrane transport	4.32e-06	2.25	546	37	[Shisa6 - shisa homolog 6 (xenopus laevis), Adc - arginine decarboxylase, Nlgn2 - neuroligin 2, Hcn1 - hyperpolarization-activated, cyclic nucleotide-gated k+ 1, Ptk2b - ptk2 protein tyrosine kinase 2 beta, Kcnj1 - potassium inwardly-rectifying channel, subfamily j, member 1, Kcna2 - potassium voltage-gated channel, shaker-related subfamily, member 2, Nrxn1 - neurexin i, Cxcl10 - chemokine (c-x-c…
	GO:0015672	monovalent inorganic cation transport	0.000378	2.25	325	22	[Kcnc3 - potassium voltage gated channel, shaw-related subfamily, member 3, Slc17a4 - solute carrier family 17 (sodium phosphate), member 4, Slc8a2 - solute carrier family 8 (sodium/calcium exchanger), member 2, Kcnc1 - potassium voltage gated channel, shaw-related subfamily, member 1, Slc38a1 - solute carrier family 38, member 1, Slc46a1 - solute carrier family 46, member 1, Kcnh3 - potassium vo…
	GO:0002684	positive regulation of immune system process	1.73e-08	2.24	831	56	[Gpam - glycerol-3-phosphate acyltransferase, mitochondrial, Ptger4 - prostaglandin e receptor 4 (subtype ep4), Il13ra2 - interleukin 13 receptor, alpha 2, Aif1 - allograft inflammatory factor 1, Cfp - complement factor properdin, Ptk2b - ptk2 protein tyrosine kinase 2 beta, H2-T10 - histocompatibility 2, t region locus 10, Daf2 - decay accelerating factor 2, Socs1 - suppressor of cytokine signal…
	GO:0032101	regulation of response to external stimulus	2.5e-07	2.24	697	47	[Cd59a - cd59a antigen, Aipl1 - aryl hydrocarbon receptor-interacting protein-like 1, Ptger4 - prostaglandin e receptor 4 (subtype ep4), Fn1 - fibronectin 1, Aif1 - allograft inflammatory factor 1, Dnase1l3 - deoxyribonuclease 1-like 3, Ccl24 - chemokine (c-c motif) ligand 24, C5ar2 - complement component 5a receptor 2, Otud7a - otu domain containing 7a, Lpar1 - lysophosphatidic acid receptor 1, …
	GO:0045666	positive regulation of neuron differentiation	3.81e-05	2.24	445	30	[Fn1 - fibronectin 1, Snap91 - synaptosomal-associated protein 91, Lpar1 - lysophosphatidic acid receptor 1, Vwc2 - von willebrand factor c domain containing 2, Vegfa - vascular endothelial growth factor a, Nlgn2 - neuroligin 2, Ptk2b - ptk2 protein tyrosine kinase 2 beta, Pcp4 - purkinje cell protein 4, Nkx6-1 - nk6 homeobox 1, Cux2 - cut-like homeobox 2, Cnr1 - cannabinoid receptor 1 (brain), A…
	GO:0002521	leukocyte differentiation	0.000525	2.24	311	21	[Ptger4 - prostaglandin e receptor 4 (subtype ep4), Clec4e - c-type lectin domain family 4, member e, Cebpa - ccaat/enhancer binding protein (c/ebp), alpha, Trf - transferrin, Spib - spi-b transcription factor (spi-1/pu.1 related), Vegfa - vascular endothelial growth factor a, Fzd7 - frizzled homolog 7 (drosophila), Ptk2b - ptk2 protein tyrosine kinase 2 beta, Batf2 - basic leucine zipper transcr…
	GO:0045765	regulation of angiogenesis	0.000701	2.24	296	20	[C3 - complement component 3, Cd59a - cd59a antigen, Ngfr - nerve growth factor receptor (tnfr superfamily, member 16), Meox2 - mesenchyme homeobox 2, C5ar1 - complement component 5a receptor 1, Cyp1b1 - cytochrome p450, family 1, subfamily b, polypeptide 1, Hc - hemolytic complement, Ccl24 - chemokine (c-c motif) ligand 24, Jak1 - janus kinase 1, Gata6 - gata binding protein 6, Psg22 - pregnancy…
	GO:0050769	positive regulation of neurogenesis	5.32e-06	2.23	551	37	[Fn1 - fibronectin 1, Snap91 - synaptosomal-associated protein 91, Trf - transferrin, Lpar1 - lysophosphatidic acid receptor 1, Vwc2 - von willebrand factor c domain containing 2, Vegfa - vascular endothelial growth factor a, Nlgn2 - neuroligin 2, Ptk2b - ptk2 protein tyrosine kinase 2 beta, Pcp4 - purkinje cell protein 4, Cux2 - cut-like homeobox 2, Nkx6-1 - nk6 homeobox 1, Cnr1 - cannabinoid re…
	GO:0045927	positive regulation of growth	0.000762	2.23	298	20	[C3 - complement component 3, Gpam - glycerol-3-phosphate acyltransferase, mitochondrial, Ptger4 - prostaglandin e receptor 4 (subtype ep4), Vil1 - villin 1, Fn1 - fibronectin 1, Sfrp1 - secreted frizzled-related protein 1, Syt4 - synaptotagmin iv, Cyba - cytochrome b-245, alpha polypeptide, Gata6 - gata binding protein 6, Vegfa - vascular endothelial growth factor a, Gata4 - gata binding protein…
	GO:1902533	positive regulation of intracellular signal transduction	2.07e-09	2.22	957	64	[Ptger4 - prostaglandin e receptor 4 (subtype ep4), Ern1 - endoplasmic reticulum (er) to nucleus signalling 1, Fzd10 - frizzled homolog 10 (drosophila), Trf - transferrin, Jak1 - janus kinase 1, Lpar1 - lysophosphatidic acid receptor 1, Mst1r - macrophage stimulating 1 receptor (c-met-related tyrosine kinase), Fgd4 - fyve, rhogef and ph domain containing 4, Ptk2b - ptk2 protein tyrosine kinase 2 …
	GO:0031344	regulation of cell projection organization	1.28e-07	2.22	747	50	[Fn1 - fibronectin 1, Lpar1 - lysophosphatidic acid receptor 1, Nlgn2 - neuroligin 2, Ptk2b - ptk2 protein tyrosine kinase 2 beta, Ache - acetylcholinesterase, Nrxn1 - neurexin i, Sdk1 - sidekick homolog 1 (chicken), Rtn4rl2 - reticulon 4 receptor-like 2, Stau2 - staufen (rna binding protein) homolog 2 (drosophila), Il1rapl1 - interleukin 1 receptor accessory protein-like 1, Ephb2 - eph receptor …
	GO:0007154	cell communication	1.02e-06	2.2	665	44	[Shisa6 - shisa homolog 6 (xenopus laevis), Slc8a2 - solute carrier family 8 (sodium/calcium exchanger), member 2, Pcdh8 - protocadherin 8, Snap91 - synaptosomal-associated protein 91, Wnt10a - wingless related mmtv integration site 10a, Dlg2 - discs, large homolog 2 (drosophila), Wnt11 - wingless-related mmtv integration site 11, Postn - periostin, osteoblast specific factor, Gjb6 - gap junction…
	GO:0040012	regulation of locomotion	6.89e-09	2.18	942	62	[Ptger4 - prostaglandin e receptor 4 (subtype ep4), Fn1 - fibronectin 1, Unc5c - unc-5 homolog c (c. elegans), Aif1 - allograft inflammatory factor 1, Trf - transferrin, Lpar1 - lysophosphatidic acid receptor 1, Ptk2b - ptk2 protein tyrosine kinase 2 beta, Wnt11 - wingless-related mmtv integration site 11, Postn - periostin, osteoblast specific factor, Wnt5b - wingless-related mmtv integration si…
	GO:0002683	negative regulation of immune system process	8.25e-05	2.18	442	29	[Cd59a - cd59a antigen, Gpam - glycerol-3-phosphate acyltransferase, mitochondrial, Ptger4 - prostaglandin e receptor 4 (subtype ep4), Il13ra2 - interleukin 13 receptor, alpha 2, C5ar2 - complement component 5a receptor 2, Meis2 - meis homeobox 2, Pawr - prkc, apoptosis, wt1, regulator, Ptk2b - ptk2 protein tyrosine kinase 2 beta, Il1rl1 - interleukin 1 receptor-like 1, Cnr1 - cannabinoid recepto…
	GO:1904062	regulation of cation transmembrane transport	0.000759	2.18	320	21	[Ephb2 - eph receptor b2, Shisa6 - shisa homolog 6 (xenopus laevis), Kcnc1 - potassium voltage gated channel, shaw-related subfamily, member 1, Cyba - cytochrome b-245, alpha polypeptide, Nlgn2 - neuroligin 2, Hcn1 - hyperpolarization-activated, cyclic nucleotide-gated k+ 1, Ptk2b - ptk2 protein tyrosine kinase 2 beta, Kcnj2 - potassium inwardly-rectifying channel, subfamily j, member 2, Cacna1a …
	GO:0009653	anatomical structure morphogenesis	2.18e-13	2.17	1498	98	[Ptger4 - prostaglandin e receptor 4 (subtype ep4), Camk2a - calcium/calmodulin-dependent protein kinase ii alpha, Errfi1 - erbb receptor feedback inhibitor 1, Myo16 - myosin xvi, Gdnf - glial cell line derived neurotrophic factor, Esrrb - estrogen related receptor, beta, Car9 - carbonic anhydrase 9, Cyp7b1 - cytochrome p450, family 7, subfamily b, polypeptide 1, Eya4 - eyes absent 4 homolog (dro…
	GO:0031401	positive regulation of protein modification process	1.19e-10	2.17	1178	77	[Ptger4 - prostaglandin e receptor 4 (subtype ep4), Ern1 - endoplasmic reticulum (er) to nucleus signalling 1, Fzd10 - frizzled homolog 10 (drosophila), Aif1 - allograft inflammatory factor 1, Gdnf - glial cell line derived neurotrophic factor, Trf - transferrin, Lpar1 - lysophosphatidic acid receptor 1, Mst1r - macrophage stimulating 1 receptor (c-met-related tyrosine kinase), Fgd4 - fyve, rhoge…
	GO:0048638	regulation of developmental growth	0.00026	2.17	382	25	[Vil1 - villin 1, Ptger4 - prostaglandin e receptor 4 (subtype ep4), Gpam - glycerol-3-phosphate acyltransferase, mitochondrial, Col14a1 - collagen, type xiv, alpha 1, Fn1 - fibronectin 1, Colq - collagen-like tail subunit (single strand of homotrimer) of asymmetric acetylcholinesterase, Vegfa - vascular endothelial growth factor a, Sema4g - sema domain, immunoglobulin domain (ig), transmembrane …
	GO:0022407	regulation of cell-cell adhesion	0.000361	2.16	368	24	[Gpam - glycerol-3-phosphate acyltransferase, mitochondrial, Pycard - pyd and card domain containing, Aif1 - allograft inflammatory factor 1, Sirpa - signal-regulatory protein alpha, Vegfa - vascular endothelial growth factor a, Clec4g - c-type lectin domain family 4, member g, Pawr - prkc, apoptosis, wt1, regulator, Ccdc88b - coiled-coil domain containing 88b, Fermt3 - fermitin family homolog 3 …
	GO:0051480	regulation of cytosolic calcium ion concentration	0.000822	2.16	322	21	[Glp1r - glucagon-like peptide 1 receptor, Ptger4 - prostaglandin e receptor 4 (subtype ep4), Adra1b - adrenergic receptor, alpha 1b, Slc8a2 - solute carrier family 8 (sodium/calcium exchanger), member 2, C5ar1 - complement component 5a receptor 1, Htr2c - 5-hydroxytryptamine (serotonin) receptor 2c, C5ar2 - complement component 5a receptor 2, Lpar1 - lysophosphatidic acid receptor 1, Pawr - prkc…
	GO:0040011	locomotion	1.34e-08	2.15	959	62	[Fn1 - fibronectin 1, Gdnf - glial cell line derived neurotrophic factor, Lpar1 - lysophosphatidic acid receptor 1, Nlgn2 - neuroligin 2, Ptk2b - ptk2 protein tyrosine kinase 2 beta, Ajuba - ajuba lim protein, Nrtn - neurturin, Cxcl16 - chemokine (c-x-c motif) ligand 16, Ackr4 - atypical chemokine receptor 4, Ndn - necdin, Cyp7b1 - cytochrome p450, family 7, subfamily b, polypeptide 1, Ccl20 - ch…
	GO:0007399	nervous system development	0.000304	2.15	386	25	[Gdnf - glial cell line derived neurotrophic factor, Vegfa - vascular endothelial growth factor a, Sema4g - sema domain, immunoglobulin domain (ig), transmembrane domain (tm) and short cytoplasmic domain, (semaphorin) 4g, Atcay - ataxia, cerebellar, cayman type homolog (human), Cntn1 - contactin 1, Lrp2 - low density lipoprotein receptor-related protein 2, Ephb2 - eph receptor b2, Ngfr - nerve gr…
	GO:0051960	regulation of nervous system development	6.44e-09	2.14	1008	65	[Fn1 - fibronectin 1, Trf - transferrin, Lpar1 - lysophosphatidic acid receptor 1, Nlgn2 - neuroligin 2, Ptk2b - ptk2 protein tyrosine kinase 2 beta, Lrrtm4 - leucine rich repeat transmembrane neuronal 4, Ache - acetylcholinesterase, Nrxn1 - neurexin i, Sdk1 - sidekick homolog 1 (chicken), Stau2 - staufen (rna binding protein) homolog 2 (drosophila), Rtn4rl2 - reticulon 4 receptor-like 2, Lrp2 - …
	GO:0031346	positive regulation of cell projection organization	0.000108	2.14	449	29	[Vil1 - villin 1, Fn1 - fibronectin 1, Snap91 - synaptosomal-associated protein 91, Lpar1 - lysophosphatidic acid receptor 1, Vegfa - vascular endothelial growth factor a, Nlgn2 - neuroligin 2, Ptk2b - ptk2 protein tyrosine kinase 2 beta, Pcp4 - purkinje cell protein 4, Cux2 - cut-like homeobox 2, Cnr1 - cannabinoid receptor 1 (brain), Ache - acetylcholinesterase, Cntn1 - contactin 1, Stau2 - sta…
	GO:0010720	positive regulation of cell development	6.51e-06	2.13	623	40	[Fn1 - fibronectin 1, Snap91 - synaptosomal-associated protein 91, Trf - transferrin, Lpar1 - lysophosphatidic acid receptor 1, Vwc2 - von willebrand factor c domain containing 2, Nlgn2 - neuroligin 2, Vegfa - vascular endothelial growth factor a, Ptk2b - ptk2 protein tyrosine kinase 2 beta, Pcp4 - purkinje cell protein 4, Cux2 - cut-like homeobox 2, Nkx6-1 - nk6 homeobox 1, Cnr1 - cannabinoid re…
	GO:1901342	regulation of vasculature development	0.000999	2.13	327	21	[C3 - complement component 3, Cd59a - cd59a antigen, Ptger4 - prostaglandin e receptor 4 (subtype ep4), Ngfr - nerve growth factor receptor (tnfr superfamily, member 16), Meox2 - mesenchyme homeobox 2, C5ar1 - complement component 5a receptor 1, Cyp1b1 - cytochrome p450, family 1, subfamily b, polypeptide 1, Hc - hemolytic complement, Ccl24 - chemokine (c-c motif) ligand 24, Jak1 - janus kinase 1…
	GO:0030001	metal ion transport	2.84e-05	2.12	549	35	[Glp1r - glucagon-like peptide 1 receptor, Camk2a - calcium/calmodulin-dependent protein kinase ii alpha, Slc8a2 - solute carrier family 8 (sodium/calcium exchanger), member 2, Trf - transferrin, Vdr - vitamin d receptor, Pawr - prkc, apoptosis, wt1, regulator, Hcn1 - hyperpolarization-activated, cyclic nucleotide-gated k+ 1, Slc4a4 - solute carrier family 4 (anion exchanger), member 4, Steap1 - …
	GO:0051240	positive regulation of multicellular organismal process	1.42e-14	2.11	1775	113	[Ptger4 - prostaglandin e receptor 4 (subtype ep4), Gdnf - glial cell line derived neurotrophic factor, Nlgn2 - neuroligin 2, Esrrb - estrogen related receptor, beta, Ptk2b - ptk2 protein tyrosine kinase 2 beta, Gdf10 - growth differentiation factor 10, Postn - periostin, osteoblast specific factor, Nrxn1 - neurexin i, Ache - acetylcholinesterase, Socs1 - suppressor of cytokine signaling 1, Cd163…
	GO:0050678	regulation of epithelial cell proliferation	0.000872	2.11	346	22	[Ngfr - nerve growth factor receptor (tnfr superfamily, member 16), Errfi1 - erbb receptor feedback inhibitor 1, Sfrp1 - secreted frizzled-related protein 1, C5ar1 - complement component 5a receptor 1, Ccl24 - chemokine (c-c motif) ligand 24, C5ar2 - complement component 5a receptor 2, Ccl12 - chemokine (c-c motif) ligand 12, Cyba - cytochrome b-245, alpha polypeptide, Vegfa - vascular endothelia…
	GO:0051051	negative regulation of transport	8.07e-05	2.09	509	32	[Ptger4 - prostaglandin e receptor 4 (subtype ep4), Il13ra2 - interleukin 13 receptor, alpha 2, Fn1 - fibronectin 1, C5ar2 - complement component 5a receptor 2, Pawr - prkc, apoptosis, wt1, regulator, Ptk2b - ptk2 protein tyrosine kinase 2 beta, Cnr1 - cannabinoid receptor 1 (brain), Bmp8a - bone morphogenetic protein 8a, Il33 - interleukin 33, Best3 - bestrophin 3, Slc18a1 - solute carrier famil…
	GO:0098660	inorganic ion transmembrane transport	0.000219	2.09	445	28	[Glp1r - glucagon-like peptide 1 receptor, Slc8a2 - solute carrier family 8 (sodium/calcium exchanger), member 2, Slc46a1 - solute carrier family 46, member 1, Pawr - prkc, apoptosis, wt1, regulator, Hcn1 - hyperpolarization-activated, cyclic nucleotide-gated k+ 1, Steap1 - six transmembrane epithelial antigen of the prostate 1, Kcnj1 - potassium inwardly-rectifying channel, subfamily j, member 1…
	GO:0008284	positive regulation of cell proliferation	7.47e-08	2.08	959	60	[Gpam - glycerol-3-phosphate acyltransferase, mitochondrial, Ptger4 - prostaglandin e receptor 4 (subtype ep4), Ern1 - endoplasmic reticulum (er) to nucleus signalling 1, Fn1 - fibronectin 1, Aif1 - allograft inflammatory factor 1, Trf - transferrin, Gdnf - glial cell line derived neurotrophic factor, Nlgn2 - neuroligin 2, Pthlh - parathyroid hormone-like peptide, Ptk2b - ptk2 protein tyrosine ki…
	GO:0006812	cation transport	4.17e-06	2.08	702	44	[Glp1r - glucagon-like peptide 1 receptor, Camk2a - calcium/calmodulin-dependent protein kinase ii alpha, Slc8a2 - solute carrier family 8 (sodium/calcium exchanger), member 2, Adc - arginine decarboxylase, Trf - transferrin, Slc46a1 - solute carrier family 46, member 1, Vdr - vitamin d receptor, Pawr - prkc, apoptosis, wt1, regulator, Hcn1 - hyperpolarization-activated, cyclic nucleotide-gated k…
	GO:0052547	regulation of peptidase activity	0.000479	2.08	398	25	[Vegfa - vascular endothelial growth factor a, Pawr - prkc, apoptosis, wt1, regulator, Spock3 - sparc/osteonectin, cwcv and kazal-like domains proteoglycan 3, Serpinb11 - serine (or cysteine) peptidase inhibitor, clade b (ovalbumin), member 11, Serpina3n - serine (or cysteine) peptidase inhibitor, clade a, member 3n, Serpina3g - serine (or cysteine) peptidase inhibitor, clade a, member 3g, Lgmn -…
	GO:0045664	regulation of neuron differentiation	2.19e-06	2.07	753	47	[Fn1 - fibronectin 1, Snap91 - synaptosomal-associated protein 91, Lpar1 - lysophosphatidic acid receptor 1, Vwc2 - von willebrand factor c domain containing 2, Nlgn2 - neuroligin 2, Vegfa - vascular endothelial growth factor a, Ptk2b - ptk2 protein tyrosine kinase 2 beta, Sema4g - sema domain, immunoglobulin domain (ig), transmembrane domain (tm) and short cytoplasmic domain, (semaphorin) 4g, Pc…
	GO:0010817	regulation of hormone levels	7.54e-05	2.07	530	33	[Glp1r - glucagon-like peptide 1 receptor, Ptger4 - prostaglandin e receptor 4 (subtype ep4), Gpr119 - g-protein coupled receptor 119, Nlgn2 - neuroligin 2, Vdr - vitamin d receptor, Nkx6-1 - nk6 homeobox 1, Cnr1 - cannabinoid receptor 1 (brain), Bmp8a - bone morphogenetic protein 8a, Ache - acetylcholinesterase, Nrxn1 - neurexin i, Bmp2 - bone morphogenetic protein 2, Trpm2 - transient receptor …
	GO:0001932	regulation of protein phosphorylation	1.6e-10	2.06	1370	85	[Ern1 - endoplasmic reticulum (er) to nucleus signalling 1, Ptger4 - prostaglandin e receptor 4 (subtype ep4), Fzd10 - frizzled homolog 10 (drosophila), Errfi1 - erbb receptor feedback inhibitor 1, Fn1 - fibronectin 1, Ppef2 - protein phosphatase, ef hand calcium-binding domain 2, Aif1 - allograft inflammatory factor 1, Gdnf - glial cell line derived neurotrophic factor, Trf - transferrin, Lpar1 …
	GO:0072507	divalent inorganic cation homeostasis	0.000228	2.05	469	29	[Glp1r - glucagon-like peptide 1 receptor, Ptger4 - prostaglandin e receptor 4 (subtype ep4), Slc8a2 - solute carrier family 8 (sodium/calcium exchanger), member 2, C5ar2 - complement component 5a receptor 2, Lpar1 - lysophosphatidic acid receptor 1, Pthlh - parathyroid hormone-like peptide, Pawr - prkc, apoptosis, wt1, regulator, Vdr - vitamin d receptor, Ptk2b - ptk2 protein tyrosine kinase 2 b…
	GO:0006928	movement of cell or subcellular component	2.77e-09	2.04	1239	76	[Fn1 - fibronectin 1, Unc5c - unc-5 homolog c (c. elegans), Gdnf - glial cell line derived neurotrophic factor, Lpar1 - lysophosphatidic acid receptor 1, Ptk2b - ptk2 protein tyrosine kinase 2 beta, Myo1e - myosin ie, Ccdc63 - coiled-coil domain containing 63, Nrtn - neurturin, Ajuba - ajuba lim protein, Alcam - activated leukocyte cell adhesion molecule, Stau2 - staufen (rna binding protein) hom…
	GO:0043086	negative regulation of catalytic activity	1.41e-05	2.04	667	41	[Fzd10 - frizzled homolog 10 (drosophila), Errfi1 - erbb receptor feedback inhibitor 1, Snap91 - synaptosomal-associated protein 91, Vegfa - vascular endothelial growth factor a, Dlg2 - discs, large homolog 2 (drosophila), Pcp4 - purkinje cell protein 4, Elfn2 - leucine rich repeat and fibronectin type iii, extracellular 2, Cnr1 - cannabinoid receptor 1 (brain), Serpinb11 - serine (or cysteine) p…
	GO:0045860	positive regulation of protein kinase activity	0.000402	2.04	439	27	[Ern1 - endoplasmic reticulum (er) to nucleus signalling 1, Fzd10 - frizzled homolog 10 (drosophila), Trf - transferrin, Lpar1 - lysophosphatidic acid receptor 1, Vegfa - vascular endothelial growth factor a, Mst1r - macrophage stimulating 1 receptor (c-met-related tyrosine kinase), Fgd4 - fyve, rhogef and ph domain containing 4, Ptk2b - ptk2 protein tyrosine kinase 2 beta, Adam9 - a disintegrin …
	GO:0055074	calcium ion homeostasis	0.000416	2.04	440	27	[Glp1r - glucagon-like peptide 1 receptor, Ptger4 - prostaglandin e receptor 4 (subtype ep4), Slc8a2 - solute carrier family 8 (sodium/calcium exchanger), member 2, C5ar2 - complement component 5a receptor 2, Lpar1 - lysophosphatidic acid receptor 1, Pthlh - parathyroid hormone-like peptide, Vdr - vitamin d receptor, Pawr - prkc, apoptosis, wt1, regulator, Ptk2b - ptk2 protein tyrosine kinase 2 b…
	GO:0060284	regulation of cell development	5.65e-08	2.03	1044	64	[Fn1 - fibronectin 1, Trf - transferrin, Lpar1 - lysophosphatidic acid receptor 1, Nlgn2 - neuroligin 2, Ptk2b - ptk2 protein tyrosine kinase 2 beta, Postn - periostin, osteoblast specific factor, Ache - acetylcholinesterase, Sdk1 - sidekick homolog 1 (chicken), Stau2 - staufen (rna binding protein) homolog 2 (drosophila), Rtn4rl2 - reticulon 4 receptor-like 2, Lrp2 - low density lipoprotein rece…
	GO:0002694	regulation of leukocyte activation	0.000219	2.03	491	30	[Gpam - glycerol-3-phosphate acyltransferase, mitochondrial, Il13ra2 - interleukin 13 receptor, alpha 2, Aif1 - allograft inflammatory factor 1, Pawr - prkc, apoptosis, wt1, regulator, Il1rl1 - interleukin 1 receptor-like 1, Cnr1 - cannabinoid receptor 1 (brain), Cnr2 - cannabinoid receptor 2 (macrophage), Il33 - interleukin 33, Socs1 - suppressor of cytokine signaling 1, Cd163l1 - cd163 molecule…
	GO:0042391	regulation of membrane potential	0.000553	2.03	425	26	[Nlgn2 - neuroligin 2, Pawr - prkc, apoptosis, wt1, regulator, Hcn1 - hyperpolarization-activated, cyclic nucleotide-gated k+ 1, Ptk2b - ptk2 protein tyrosine kinase 2 beta, Cux2 - cut-like homeobox 2, Kcna2 - potassium voltage-gated channel, shaker-related subfamily, member 2, Cnr1 - cannabinoid receptor 1 (brain), P2rx2 - purinergic receptor p2x, ligand-gated ion channel, 2, Nrxn1 - neurexin i,…
	GO:0042325	regulation of phosphorylation	1.26e-10	2.02	1481	90	[Ern1 - endoplasmic reticulum (er) to nucleus signalling 1, Ptger4 - prostaglandin e receptor 4 (subtype ep4), Fzd10 - frizzled homolog 10 (drosophila), Errfi1 - erbb receptor feedback inhibitor 1, Fn1 - fibronectin 1, Ppef2 - protein phosphatase, ef hand calcium-binding domain 2, Aif1 - allograft inflammatory factor 1, Gdnf - glial cell line derived neurotrophic factor, Trf - transferrin, Lpar1 …
	GO:0072503	cellular divalent inorganic cation homeostasis	0.000462	2.02	443	27	[Glp1r - glucagon-like peptide 1 receptor, Ptger4 - prostaglandin e receptor 4 (subtype ep4), Slc8a2 - solute carrier family 8 (sodium/calcium exchanger), member 2, C5ar2 - complement component 5a receptor 2, Lpar1 - lysophosphatidic acid receptor 1, Vdr - vitamin d receptor, Pawr - prkc, apoptosis, wt1, regulator, Ptk2b - ptk2 protein tyrosine kinase 2 beta, Avpr1a - arginine vasopressin recepto…
	GO:0034220	ion transmembrane transport	8.03e-05	2.01	578	35	[Glp1r - glucagon-like peptide 1 receptor, Slc8a2 - solute carrier family 8 (sodium/calcium exchanger), member 2, Slc46a1 - solute carrier family 46, member 1, Lrrc8e - leucine rich repeat containing 8 family, member e, Pawr - prkc, apoptosis, wt1, regulator, Hcn1 - hyperpolarization-activated, cyclic nucleotide-gated k+ 1, Steap1 - six transmembrane epithelial antigen of the prostate 1, Kcnj1 - …
	GO:0002682	regulation of immune system process	7.73e-09	2	1245	75	[Cd59a - cd59a antigen, Gpam - glycerol-3-phosphate acyltransferase, mitochondrial, Ptger4 - prostaglandin e receptor 4 (subtype ep4), Il13ra2 - interleukin 13 receptor, alpha 2, Aif1 - allograft inflammatory factor 1, Cfp - complement factor properdin, Ptk2b - ptk2 protein tyrosine kinase 2 beta, H2-T10 - histocompatibility 2, t region locus 10, Daf2 - decay accelerating factor 2, Socs1 - suppre…
	GO:0050865	regulation of cell activation	0.000175	2	531	32	[Gpam - glycerol-3-phosphate acyltransferase, mitochondrial, Il13ra2 - interleukin 13 receptor, alpha 2, Aif1 - allograft inflammatory factor 1, Pawr - prkc, apoptosis, wt1, regulator, Il1rl1 - interleukin 1 receptor-like 1, Cnr1 - cannabinoid receptor 1 (brain), Cnr2 - cannabinoid receptor 2 (macrophage), Il33 - interleukin 33, Socs1 - suppressor of cytokine signaling 1, Cd163l1 - cd163 molecule…
	GO:0060627	regulation of vesicle-mediated transport	0.000428	2	464	28	[Il13ra2 - interleukin 13 receptor, alpha 2, Snap91 - synaptosomal-associated protein 91, Trf - transferrin, Cadps - ca2+-dependent secretion activator, Vegfa - vascular endothelial growth factor a, Syt8 - synaptotagmin viii, Lrp2 - low density lipoprotein receptor-related protein 2, Il1rapl1 - interleukin 1 receptor accessory protein-like 1, Rab3c - rab3c, member ras oncogene family, Src - rous …
	GO:0050767	regulation of neurogenesis	9.45e-07	1.99	915	55	[Fn1 - fibronectin 1, Trf - transferrin, Lpar1 - lysophosphatidic acid receptor 1, Nlgn2 - neuroligin 2, Ptk2b - ptk2 protein tyrosine kinase 2 beta, Ache - acetylcholinesterase, Sdk1 - sidekick homolog 1 (chicken), Stau2 - staufen (rna binding protein) homolog 2 (drosophila), Rtn4rl2 - reticulon 4 receptor-like 2, Lrp2 - low density lipoprotein receptor-related protein 2, Il1rapl1 - interleukin …
	GO:0019220	regulation of phosphate metabolic process	4.52e-11	1.98	1642	98	[Ptger4 - prostaglandin e receptor 4 (subtype ep4), Errfi1 - erbb receptor feedback inhibitor 1, Fzd10 - frizzled homolog 10 (drosophila), Gdnf - glial cell line derived neurotrophic factor, Esrrb - estrogen related receptor, beta, Mst1r - macrophage stimulating 1 receptor (c-met-related tyrosine kinase), Ptk2b - ptk2 protein tyrosine kinase 2 beta, Gdf10 - growth differentiation factor 10, Marco…
	GO:0051174	regulation of phosphorus metabolic process	4.68e-11	1.98	1643	98	[Ptger4 - prostaglandin e receptor 4 (subtype ep4), Errfi1 - erbb receptor feedback inhibitor 1, Fzd10 - frizzled homolog 10 (drosophila), Gdnf - glial cell line derived neurotrophic factor, Esrrb - estrogen related receptor, beta, Mst1r - macrophage stimulating 1 receptor (c-met-related tyrosine kinase), Ptk2b - ptk2 protein tyrosine kinase 2 beta, Gdf10 - growth differentiation factor 10, Marco…
	GO:0051094	positive regulation of developmental process	4.03e-10	1.98	1491	89	[Gpam - glycerol-3-phosphate acyltransferase, mitochondrial, Ptger4 - prostaglandin e receptor 4 (subtype ep4), Fn1 - fibronectin 1, Gdnf - glial cell line derived neurotrophic factor, Trf - transferrin, Jak1 - janus kinase 1, Lpar1 - lysophosphatidic acid receptor 1, Nlgn2 - neuroligin 2, Esrrb - estrogen related receptor, beta, Ptk2b - ptk2 protein tyrosine kinase 2 beta, Gdf10 - growth differe…
	GO:0009967	positive regulation of signal transduction	7.58e-10	1.98	1438	86	[Ern1 - endoplasmic reticulum (er) to nucleus signalling 1, Ptger4 - prostaglandin e receptor 4 (subtype ep4), Fzd10 - frizzled homolog 10 (drosophila), Trf - transferrin, Jak1 - janus kinase 1, Lpar1 - lysophosphatidic acid receptor 1, Nlgn2 - neuroligin 2, Fgd4 - fyve, rhogef and ph domain containing 4, Mst1r - macrophage stimulating 1 receptor (c-met-related tyrosine kinase), Bmp3 - bone morph…
	GO:0051049	regulation of transport	1.88e-11	1.94	1809	106	[Ptger4 - prostaglandin e receptor 4 (subtype ep4), Camk2a - calcium/calmodulin-dependent protein kinase ii alpha, Gdnf - glial cell line derived neurotrophic factor, Nlgn2 - neuroligin 2, Ptk2b - ptk2 protein tyrosine kinase 2 beta, Kcnj1 - potassium inwardly-rectifying channel, subfamily j, member 1, Postn - periostin, osteoblast specific factor, Nrxn1 - neurexin i, Socs1 - suppressor of cytoki…
	GO:0007166	cell surface receptor signaling pathway	8.51e-10	1.92	1586	92	[Camk2a - calcium/calmodulin-dependent protein kinase ii alpha, Shisa6 - shisa homolog 6 (xenopus laevis), Fzd10 - frizzled homolog 10 (drosophila), Unc5c - unc-5 homolog c (c. elegans), Gdnf - glial cell line derived neurotrophic factor, Jak1 - janus kinase 1, Wnt10a - wingless related mmtv integration site 10a, Mst1r - macrophage stimulating 1 receptor (c-met-related tyrosine kinase), Ptk2b - p…
	GO:0032270	positive regulation of cellular protein metabolic process	8.11e-09	1.9	1487	85	[Ern1 - endoplasmic reticulum (er) to nucleus signalling 1, Ptger4 - prostaglandin e receptor 4 (subtype ep4), Fzd10 - frizzled homolog 10 (drosophila), Aif1 - allograft inflammatory factor 1, Gdnf - glial cell line derived neurotrophic factor, Trf - transferrin, Lpar1 - lysophosphatidic acid receptor 1, Fgd4 - fyve, rhogef and ph domain containing 4, Mst1r - macrophage stimulating 1 receptor (c-…
	GO:0045597	positive regulation of cell differentiation	1.11e-06	1.9	1063	61	[Ptger4 - prostaglandin e receptor 4 (subtype ep4), Fn1 - fibronectin 1, Trf - transferrin, Gdnf - glial cell line derived neurotrophic factor, Lpar1 - lysophosphatidic acid receptor 1, Nlgn2 - neuroligin 2, Ptk2b - ptk2 protein tyrosine kinase 2 beta, Gdf10 - growth differentiation factor 10, Ache - acetylcholinesterase, Socs1 - suppressor of cytokine signaling 1, Wnt5b - wingless-related mmtv i…
	GO:0048584	positive regulation of response to stimulus	1.49e-11	1.89	1998	114	[Ptger4 - prostaglandin e receptor 4 (subtype ep4), Fzd10 - frizzled homolog 10 (drosophila), Nlgn2 - neuroligin 2, Cfp - complement factor properdin, Mst1r - macrophage stimulating 1 receptor (c-met-related tyrosine kinase), Ptk2b - ptk2 protein tyrosine kinase 2 beta, Gdf10 - growth differentiation factor 10, H2-T10 - histocompatibility 2, t region locus 10, Marco - macrophage receptor with col…
	GO:0051130	positive regulation of cellular component organization	2.78e-07	1.89	1212	69	[Fn1 - fibronectin 1, Trf - transferrin, Lpar1 - lysophosphatidic acid receptor 1, Nlgn2 - neuroligin 2, Ptk2b - ptk2 protein tyrosine kinase 2 beta, Wnt11 - wingless-related mmtv integration site 11, Lrrtm4 - leucine rich repeat transmembrane neuronal 4, Ache - acetylcholinesterase, Nrxn1 - neurexin i, Ajuba - ajuba lim protein, Stau2 - staufen (rna binding protein) homolog 2 (drosophila), Lrp2 …
	GO:0033674	positive regulation of kinase activity	0.000851	1.89	509	29	[Ern1 - endoplasmic reticulum (er) to nucleus signalling 1, Fzd10 - frizzled homolog 10 (drosophila), Trf - transferrin, Lpar1 - lysophosphatidic acid receptor 1, Vegfa - vascular endothelial growth factor a, Fgd4 - fyve, rhogef and ph domain containing 4, Mst1r - macrophage stimulating 1 receptor (c-met-related tyrosine kinase), Ptk2b - ptk2 protein tyrosine kinase 2 beta, Adam9 - a disintegrin …
	GO:0050801	ion homeostasis	7.44e-05	1.88	742	42	[Glp1r - glucagon-like peptide 1 receptor, Gpam - glycerol-3-phosphate acyltransferase, mitochondrial, Ptger4 - prostaglandin e receptor 4 (subtype ep4), Slc8a2 - solute carrier family 8 (sodium/calcium exchanger), member 2, Trf - transferrin, C5ar2 - complement component 5a receptor 2, Lpar1 - lysophosphatidic acid receptor 1, Pthlh - parathyroid hormone-like peptide, Pawr - prkc, apoptosis, wt1…
	GO:0010563	negative regulation of phosphorus metabolic process	0.000774	1.88	530	30	[Errfi1 - erbb receptor feedback inhibitor 1, Ppef2 - protein phosphatase, ef hand calcium-binding domain 2, Dlg2 - discs, large homolog 2 (drosophila), Pcp4 - purkinje cell protein 4, Elfn2 - leucine rich repeat and fibronectin type iii, extracellular 2, Ppp1r26 - protein phosphatase 1, regulatory subunit 26, Ajuba - ajuba lim protein, Sh2d4a - sh2 domain containing 4a, Socs1 - suppressor of cyt…
	GO:0045936	negative regulation of phosphate metabolic process	0.000774	1.88	530	30	[Errfi1 - erbb receptor feedback inhibitor 1, Ppef2 - protein phosphatase, ef hand calcium-binding domain 2, Dlg2 - discs, large homolog 2 (drosophila), Pcp4 - purkinje cell protein 4, Elfn2 - leucine rich repeat and fibronectin type iii, extracellular 2, Ppp1r26 - protein phosphatase 1, regulatory subunit 26, Ajuba - ajuba lim protein, Sh2d4a - sh2 domain containing 4a, Socs1 - suppressor of cyt…
	GO:1902531	regulation of intracellular signal transduction	3.25e-09	1.87	1629	92	[Ptger4 - prostaglandin e receptor 4 (subtype ep4), Ern1 - endoplasmic reticulum (er) to nucleus signalling 1, Fzd10 - frizzled homolog 10 (drosophila), Errfi1 - erbb receptor feedback inhibitor 1, Fn1 - fibronectin 1, Obscn - obscurin, cytoskeletal calmodulin and titin-interacting rhogef, Ppef2 - protein phosphatase, ef hand calcium-binding domain 2, Trf - transferrin, Jak1 - janus kinase 1, Otu…
	GO:0045859	regulation of protein kinase activity	0.000206	1.87	655	37	[Ern1 - endoplasmic reticulum (er) to nucleus signalling 1, Fzd10 - frizzled homolog 10 (drosophila), Errfi1 - erbb receptor feedback inhibitor 1, Trf - transferrin, Lpar1 - lysophosphatidic acid receptor 1, Vegfa - vascular endothelial growth factor a, Fgd4 - fyve, rhogef and ph domain containing 4, Mst1r - macrophage stimulating 1 receptor (c-met-related tyrosine kinase), Ptk2b - ptk2 protein t…
	GO:0051050	positive regulation of transport	5.49e-06	1.86	1019	57	[Camk2a - calcium/calmodulin-dependent protein kinase ii alpha, Ptger4 - prostaglandin e receptor 4 (subtype ep4), Trf - transferrin, Nlgn2 - neuroligin 2, Postn - periostin, osteoblast specific factor, Mmp13 - matrix metallopeptidase 13, Cacng4 - calcium channel, voltage-dependent, gamma subunit 4, Lrp2 - low density lipoprotein receptor-related protein 2, Ephb2 - eph receptor b2, Acsl6 - acyl-c…
	GO:0044087	regulation of cellular component biogenesis	1.88e-05	1.86	890	50	[Ptger4 - prostaglandin e receptor 4 (subtype ep4), Lpar1 - lysophosphatidic acid receptor 1, Nlgn2 - neuroligin 2, Ptk2b - ptk2 protein tyrosine kinase 2 beta, Wnt11 - wingless-related mmtv integration site 11, Lrrtm4 - leucine rich repeat transmembrane neuronal 4, Nrxn1 - neurexin i, Ajuba - ajuba lim protein, Stau2 - staufen (rna binding protein) homolog 2 (drosophila), Il1rapl1 - interleukin …
	GO:0051223	regulation of protein transport	0.000246	1.86	661	37	[Glp1r - glucagon-like peptide 1 receptor, Gpam - glycerol-3-phosphate acyltransferase, mitochondrial, Ptger4 - prostaglandin e receptor 4 (subtype ep4), Fn1 - fibronectin 1, Snap91 - synaptosomal-associated protein 91, C5ar2 - complement component 5a receptor 2, Psg22 - pregnancy-specific glycoprotein 22, Nlgn2 - neuroligin 2, Adam9 - a disintegrin and metallopeptidase domain 9 (meltrin gamma), …
	GO:0051239	regulation of multicellular organismal process	2.15e-16	1.85	3054	170	[Ptger4 - prostaglandin e receptor 4 (subtype ep4), Errfi1 - erbb receptor feedback inhibitor 1, Gdnf - glial cell line derived neurotrophic factor, Esrrb - estrogen related receptor, beta, Pthlh - parathyroid hormone-like peptide, Nlgn2 - neuroligin 2, Ptk2b - ptk2 protein tyrosine kinase 2 beta, Gdf10 - growth differentiation factor 10, Postn - periostin, osteoblast specific factor, Nrxn1 - neu…
	GO:0010647	positive regulation of cell communication	1.7e-09	1.85	1756	98	[Ptger4 - prostaglandin e receptor 4 (subtype ep4), Fzd10 - frizzled homolog 10 (drosophila), Nlgn2 - neuroligin 2, Mst1r - macrophage stimulating 1 receptor (c-met-related tyrosine kinase), Ptk2b - ptk2 protein tyrosine kinase 2 beta, Gdf10 - growth differentiation factor 10, Marco - macrophage receptor with collagenous structure, Nrxn1 - neurexin i, Pycard - pyd and card domain containing, Mir2…
	GO:0048731	system development	0.000109	1.85	755	42	[Spata22 - spermatogenesis associated 22, Errfi1 - erbb receptor feedback inhibitor 1, Gdnf - glial cell line derived neurotrophic factor, Vegfa - vascular endothelial growth factor a, Pthlh - parathyroid hormone-like peptide, Lamc2 - laminin, gamma 2, Vdr - vitamin d receptor, Bcan - brevican, Sema4g - sema domain, immunoglobulin domain (ig), transmembrane domain (tm) and short cytoplasmic domai…
	GO:0090087	regulation of peptide transport	0.00019	1.85	701	39	[Glp1r - glucagon-like peptide 1 receptor, Gpam - glycerol-3-phosphate acyltransferase, mitochondrial, Ptger4 - prostaglandin e receptor 4 (subtype ep4), Fn1 - fibronectin 1, Snap91 - synaptosomal-associated protein 91, C5ar2 - complement component 5a receptor 2, Psg22 - pregnancy-specific glycoprotein 22, Nlgn2 - neuroligin 2, Adam9 - a disintegrin and metallopeptidase domain 9 (meltrin gamma), …
	GO:0032879	regulation of localization	6.88e-14	1.84	2627	146	[Camk2a - calcium/calmodulin-dependent protein kinase ii alpha, Ptger4 - prostaglandin e receptor 4 (subtype ep4), Unc5c - unc-5 homolog c (c. elegans), Gdnf - glial cell line derived neurotrophic factor, Nlgn2 - neuroligin 2, Ptk2b - ptk2 protein tyrosine kinase 2 beta, Kcnj1 - potassium inwardly-rectifying channel, subfamily j, member 1, Postn - periostin, osteoblast specific factor, Nrxn1 - ne…
	GO:0023056	positive regulation of signaling	2.16e-09	1.84	1764	98	[Ptger4 - prostaglandin e receptor 4 (subtype ep4), Fzd10 - frizzled homolog 10 (drosophila), Nlgn2 - neuroligin 2, Mst1r - macrophage stimulating 1 receptor (c-met-related tyrosine kinase), Ptk2b - ptk2 protein tyrosine kinase 2 beta, Gdf10 - growth differentiation factor 10, Marco - macrophage receptor with collagenous structure, Nrxn1 - neurexin i, Pycard - pyd and card domain containing, Mir2…
	GO:0040008	regulation of growth	0.000167	1.84	721	40	[Gpam - glycerol-3-phosphate acyltransferase, mitochondrial, Vil1 - villin 1, Ptger4 - prostaglandin e receptor 4 (subtype ep4), Col14a1 - collagen, type xiv, alpha 1, Irf8 - interferon regulatory factor 8, Fn1 - fibronectin 1, Colq - collagen-like tail subunit (single strand of homotrimer) of asymmetric acetylcholinesterase, Vegfa - vascular endothelial growth factor a, Ptk2b - ptk2 protein tyro…
	GO:0003006	developmental process involved in reproduction	0.000243	1.84	685	38	[Cebpa - ccaat/enhancer binding protein (c/ebp), alpha, Zmynd15 - zinc finger, mynd-type containing 15, Esrrb - estrogen related receptor, beta, Vegfa - vascular endothelial growth factor a, Vdr - vitamin d receptor, Ptk2b - ptk2 protein tyrosine kinase 2 beta, Xlr5c - x-linked lymphocyte-regulated 5c, Ccdc63 - coiled-coil domain containing 63, Csf2 - colony stimulating factor 2 (granulocyte-macr…
	GO:0055065	metal ion homeostasis	0.000632	1.84	596	33	[Glp1r - glucagon-like peptide 1 receptor, Ptger4 - prostaglandin e receptor 4 (subtype ep4), Slc8a2 - solute carrier family 8 (sodium/calcium exchanger), member 2, Trf - transferrin, C5ar2 - complement component 5a receptor 2, Lpar1 - lysophosphatidic acid receptor 1, Pthlh - parathyroid hormone-like peptide, Pawr - prkc, apoptosis, wt1, regulator, Vdr - vitamin d receptor, Ptk2b - ptk2 protein …
	GO:0030030	cell projection organization	4.22e-05	1.83	869	48	[Camk2a - calcium/calmodulin-dependent protein kinase ii alpha, Myo16 - myosin xvi, Snap91 - synaptosomal-associated protein 91, Aif1 - allograft inflammatory factor 1, Gdnf - glial cell line derived neurotrophic factor, Lpar1 - lysophosphatidic acid receptor 1, Fgd4 - fyve, rhogef and ph domain containing 4, Ush1g - usher syndrome 1g, Ptk2b - ptk2 protein tyrosine kinase 2 beta, Atcay - ataxia, …
	GO:0006873	cellular ion homeostasis	0.000669	1.83	598	33	[Glp1r - glucagon-like peptide 1 receptor, Ptger4 - prostaglandin e receptor 4 (subtype ep4), Slc8a2 - solute carrier family 8 (sodium/calcium exchanger), member 2, Trf - transferrin, C5ar2 - complement component 5a receptor 2, Lpar1 - lysophosphatidic acid receptor 1, Pawr - prkc, apoptosis, wt1, regulator, Vdr - vitamin d receptor, Ptk2b - ptk2 protein tyrosine kinase 2 beta, Slc4a4 - solute ca…
	GO:0044057	regulation of system process	0.000998	1.83	563	31	[Glp1r - glucagon-like peptide 1 receptor, Ptger4 - prostaglandin e receptor 4 (subtype ep4), Errfi1 - erbb receptor feedback inhibitor 1, Col14a1 - collagen, type xiv, alpha 1, Aif1 - allograft inflammatory factor 1, Trf - transferrin, Nlgn2 - neuroligin 2, Pawr - prkc, apoptosis, wt1, regulator, Ptk2b - ptk2 protein tyrosine kinase 2 beta, Avpr1a - arginine vasopressin receptor 1a, Cux2 - cut-l…
	GO:0030003	cellular cation homeostasis	0.000902	1.82	584	32	[Glp1r - glucagon-like peptide 1 receptor, Ptger4 - prostaglandin e receptor 4 (subtype ep4), Slc8a2 - solute carrier family 8 (sodium/calcium exchanger), member 2, Trf - transferrin, C5ar2 - complement component 5a receptor 2, Lpar1 - lysophosphatidic acid receptor 1, Pawr - prkc, apoptosis, wt1, regulator, Vdr - vitamin d receptor, Ptk2b - ptk2 protein tyrosine kinase 2 beta, Slc4a4 - solute ca…
	GO:2000026	regulation of multicellular organismal development	2.38e-10	1.81	2090	114	[Ptger4 - prostaglandin e receptor 4 (subtype ep4), Errfi1 - erbb receptor feedback inhibitor 1, Gdnf - glial cell line derived neurotrophic factor, Pthlh - parathyroid hormone-like peptide, Nlgn2 - neuroligin 2, Ptk2b - ptk2 protein tyrosine kinase 2 beta, Nrxn1 - neurexin i, Ache - acetylcholinesterase, Socs1 - suppressor of cytokine signaling 1, Rtn4rl2 - reticulon 4 receptor-like 2, Il1rapl1 …
	GO:0051247	positive regulation of protein metabolic process	7.79e-08	1.8	1589	86	[Ptger4 - prostaglandin e receptor 4 (subtype ep4), Ern1 - endoplasmic reticulum (er) to nucleus signalling 1, Fzd10 - frizzled homolog 10 (drosophila), Aif1 - allograft inflammatory factor 1, Trf - transferrin, Gdnf - glial cell line derived neurotrophic factor, Lpar1 - lysophosphatidic acid receptor 1, Mst1r - macrophage stimulating 1 receptor (c-met-related tyrosine kinase), Fgd4 - fyve, rhoge…
	GO:0098771	inorganic ion homeostasis	0.000434	1.8	681	37	[Glp1r - glucagon-like peptide 1 receptor, Ptger4 - prostaglandin e receptor 4 (subtype ep4), Slc8a2 - solute carrier family 8 (sodium/calcium exchanger), member 2, Trf - transferrin, C5ar2 - complement component 5a receptor 2, Lpar1 - lysophosphatidic acid receptor 1, Pthlh - parathyroid hormone-like peptide, Pawr - prkc, apoptosis, wt1, regulator, Vdr - vitamin d receptor, Ptk2b - ptk2 protein …
	GO:0070201	regulation of establishment of protein localization	0.000511	1.79	687	37	[Glp1r - glucagon-like peptide 1 receptor, Gpam - glycerol-3-phosphate acyltransferase, mitochondrial, Ptger4 - prostaglandin e receptor 4 (subtype ep4), Fn1 - fibronectin 1, Snap91 - synaptosomal-associated protein 91, C5ar2 - complement component 5a receptor 2, Psg22 - pregnancy-specific glycoprotein 22, Nlgn2 - neuroligin 2, Adam9 - a disintegrin and metallopeptidase domain 9 (meltrin gamma), …
	GO:0055080	cation homeostasis	0.000567	1.79	666	36	[Glp1r - glucagon-like peptide 1 receptor, Ptger4 - prostaglandin e receptor 4 (subtype ep4), Slc8a2 - solute carrier family 8 (sodium/calcium exchanger), member 2, Trf - transferrin, C5ar2 - complement component 5a receptor 2, Lpar1 - lysophosphatidic acid receptor 1, Pthlh - parathyroid hormone-like peptide, Pawr - prkc, apoptosis, wt1, regulator, Vdr - vitamin d receptor, Ptk2b - ptk2 protein …
	GO:0031399	regulation of protein modification process	3.57e-08	1.78	1712	92	[Ptger4 - prostaglandin e receptor 4 (subtype ep4), Ern1 - endoplasmic reticulum (er) to nucleus signalling 1, Fzd10 - frizzled homolog 10 (drosophila), Errfi1 - erbb receptor feedback inhibitor 1, Fn1 - fibronectin 1, Ppef2 - protein phosphatase, ef hand calcium-binding domain 2, Aif1 - allograft inflammatory factor 1, Trf - transferrin, Gdnf - glial cell line derived neurotrophic factor, Lpar1 …
	GO:0050793	regulation of developmental process	7.16e-12	1.77	2632	140	[Ptger4 - prostaglandin e receptor 4 (subtype ep4), Errfi1 - erbb receptor feedback inhibitor 1, Gdnf - glial cell line derived neurotrophic factor, Esrrb - estrogen related receptor, beta, Pthlh - parathyroid hormone-like peptide, Nlgn2 - neuroligin 2, Ptk2b - ptk2 protein tyrosine kinase 2 beta, Gdf10 - growth differentiation factor 10, Postn - periostin, osteoblast specific factor, Nrxn1 - neu…
	GO:0048585	negative regulation of response to stimulus	4e-07	1.76	1523	81	[Cd59a - cd59a antigen, Ptger4 - prostaglandin e receptor 4 (subtype ep4), Errfi1 - erbb receptor feedback inhibitor 1, Il13ra2 - interleukin 13 receptor, alpha 2, Shisa6 - shisa homolog 6 (xenopus laevis), Ppef2 - protein phosphatase, ef hand calcium-binding domain 2, Aif1 - allograft inflammatory factor 1, Gdnf - glial cell line derived neurotrophic factor, Otud7a - otu domain containing 7a, Lp…
	GO:0080134	regulation of response to stress	1.26e-05	1.74	1199	63	[Cd59a - cd59a antigen, Ptger4 - prostaglandin e receptor 4 (subtype ep4), Ern1 - endoplasmic reticulum (er) to nucleus signalling 1, Fzd10 - frizzled homolog 10 (drosophila), Errfi1 - erbb receptor feedback inhibitor 1, Trf - transferrin, Otud7a - otu domain containing 7a, Fgd4 - fyve, rhogef and ph domain containing 4, Ptk2b - ptk2 protein tyrosine kinase 2 beta, Socs1 - suppressor of cytokine …
	GO:0006811	ion transport	2.85e-05	1.74	1104	58	[Camk2a - calcium/calmodulin-dependent protein kinase ii alpha, Slc46a1 - solute carrier family 46, member 1, Trf - transferrin, Steap1 - six transmembrane epithelial antigen of the prostate 1, Slc4a4 - solute carrier family 4 (anion exchanger), member 4, Ramp1 - receptor (calcitonin) activity modifying protein 1, Kcnj1 - potassium inwardly-rectifying channel, subfamily j, member 1, Fam26f - fami…
	GO:0051336	regulation of hydrolase activity	0.000109	1.74	954	50	[Fzd10 - frizzled homolog 10 (drosophila), Lpar1 - lysophosphatidic acid receptor 1, Ptk2b - ptk2 protein tyrosine kinase 2 beta, Wnt11 - wingless-related mmtv integration site 11, Serpinb11 - serine (or cysteine) peptidase inhibitor, clade b (ovalbumin), member 11, Spock3 - sparc/osteonectin, cwcv and kazal-like domains proteoglycan 3, Serpina3n - serine (or cysteine) peptidase inhibitor, clade …
	GO:0030162	regulation of proteolysis	0.000962	1.74	686	36	[Cd59a - cd59a antigen, Vegfa - vascular endothelial growth factor a, Pawr - prkc, apoptosis, wt1, regulator, Ptk2b - ptk2 protein tyrosine kinase 2 beta, Adam9 - a disintegrin and metallopeptidase domain 9 (meltrin gamma), Serpinb11 - serine (or cysteine) peptidase inhibitor, clade b (ovalbumin), member 11, Rnf180 - ring finger protein 180, Spock3 - sparc/osteonectin, cwcv and kazal-like domains…
	GO:0045595	regulation of cell differentiation	5.53e-08	1.73	1856	97	[Ptger4 - prostaglandin e receptor 4 (subtype ep4), Errfi1 - erbb receptor feedback inhibitor 1, Gdnf - glial cell line derived neurotrophic factor, Nlgn2 - neuroligin 2, Pthlh - parathyroid hormone-like peptide, Esrrb - estrogen related receptor, beta, Ptk2b - ptk2 protein tyrosine kinase 2 beta, Gdf10 - growth differentiation factor 10, Postn - periostin, osteoblast specific factor, Ache - acet…
	GO:0042127	regulation of cell proliferation	4.33e-07	1.73	1628	85	[Dlec1 - deleted in lung and esophageal cancer 1, Gpam - glycerol-3-phosphate acyltransferase, mitochondrial, Ptger4 - prostaglandin e receptor 4 (subtype ep4), Ern1 - endoplasmic reticulum (er) to nucleus signalling 1, Errfi1 - erbb receptor feedback inhibitor 1, Fn1 - fibronectin 1, Aif1 - allograft inflammatory factor 1, Trf - transferrin, Gdnf - glial cell line derived neurotrophic factor, Pt…
	GO:0043549	regulation of kinase activity	0.000678	1.73	748	39	[Ern1 - endoplasmic reticulum (er) to nucleus signalling 1, Fzd10 - frizzled homolog 10 (drosophila), Errfi1 - erbb receptor feedback inhibitor 1, Trf - transferrin, Lpar1 - lysophosphatidic acid receptor 1, Vegfa - vascular endothelial growth factor a, Fgd4 - fyve, rhogef and ph domain containing 4, Mst1r - macrophage stimulating 1 receptor (c-met-related tyrosine kinase), Ptk2b - ptk2 protein t…
	GO:0007275	multicellular organism development	6.18e-06	1.72	1349	70	[Fzd10 - frizzled homolog 10 (drosophila), Edaradd - edar (ectodysplasin-a receptor)-associated death domain, Unc5c - unc-5 homolog c (c. elegans), Obscn - obscurin, cytoskeletal calmodulin and titin-interacting rhogef, Esrrb - estrogen related receptor, beta, Mst1r - macrophage stimulating 1 receptor (c-met-related tyrosine kinase), Wnt10a - wingless related mmtv integration site 10a, Bmp3 - bon…
	GO:0048646	anatomical structure formation involved in morphogenesis	0.000769	1.72	753	39	[Myom2 - myomesin 2, Fn1 - fibronectin 1, Pcdh8 - protocadherin 8, Gdnf - glial cell line derived neurotrophic factor, Psg22 - pregnancy-specific glycoprotein 22, Vegfa - vascular endothelial growth factor a, Pthlh - parathyroid hormone-like peptide, Ptk2b - ptk2 protein tyrosine kinase 2 beta, Wnt11 - wingless-related mmtv integration site 11, Ramp1 - receptor (calcitonin) activity modifying pro…
	GO:0009966	regulation of signal transduction	1.58e-10	1.71	2643	136	[Aipl1 - aryl hydrocarbon receptor-interacting protein-like 1, Ptger4 - prostaglandin e receptor 4 (subtype ep4), Errfi1 - erbb receptor feedback inhibitor 1, Fzd10 - frizzled homolog 10 (drosophila), Gdnf - glial cell line derived neurotrophic factor, Otud7a - otu domain containing 7a, Nlgn2 - neuroligin 2, Mst1r - macrophage stimulating 1 receptor (c-met-related tyrosine kinase), Ptk2b - ptk2 p…
	GO:0048513	animal organ development	1.07e-05	1.71	1320	68	[Ptger4 - prostaglandin e receptor 4 (subtype ep4), Edaradd - edar (ectodysplasin-a receptor)-associated death domain, Unc5c - unc-5 homolog c (c. elegans), Gdnf - glial cell line derived neurotrophic factor, Esrrb - estrogen related receptor, beta, Wnt10a - wingless related mmtv integration site 10a, Bmp3 - bone morphogenetic protein 3, Wnt11 - wingless-related mmtv integration site 11, Kcnj1 - …
	GO:0043066	negative regulation of apoptotic process	0.000224	1.71	932	48	[Glp1r - glucagon-like peptide 1 receptor, Gpam - glycerol-3-phosphate acyltransferase, mitochondrial, Aipl1 - aryl hydrocarbon receptor-interacting protein-like 1, Fn1 - fibronectin 1, Aif1 - allograft inflammatory factor 1, Gdnf - glial cell line derived neurotrophic factor, Meis3 - meis homeobox 3, Vegfa - vascular endothelial growth factor a, Mst1r - macrophage stimulating 1 receptor (c-met-r…
	GO:0023051	regulation of signaling	2.11e-12	1.7	3165	162	[Ptger4 - prostaglandin e receptor 4 (subtype ep4), Aipl1 - aryl hydrocarbon receptor-interacting protein-like 1, Camk2a - calcium/calmodulin-dependent protein kinase ii alpha, Fzd10 - frizzled homolog 10 (drosophila), Errfi1 - erbb receptor feedback inhibitor 1, Gdnf - glial cell line derived neurotrophic factor, Otud7a - otu domain containing 7a, Nlgn2 - neuroligin 2, Mst1r - macrophage stimula…
	GO:0048583	regulation of response to stimulus	1.41e-13	1.69	3517	179	[Ptger4 - prostaglandin e receptor 4 (subtype ep4), Aipl1 - aryl hydrocarbon receptor-interacting protein-like 1, Fzd10 - frizzled homolog 10 (drosophila), Errfi1 - erbb receptor feedback inhibitor 1, Gdnf - glial cell line derived neurotrophic factor, Otud7a - otu domain containing 7a, Nlgn2 - neuroligin 2, Mst1r - macrophage stimulating 1 receptor (c-met-related tyrosine kinase), Cfp - compleme…
	GO:0010646	regulation of cell communication	5.13e-12	1.69	3146	160	[Ptger4 - prostaglandin e receptor 4 (subtype ep4), Aipl1 - aryl hydrocarbon receptor-interacting protein-like 1, Camk2a - calcium/calmodulin-dependent protein kinase ii alpha, Fzd10 - frizzled homolog 10 (drosophila), Errfi1 - erbb receptor feedback inhibitor 1, Gdnf - glial cell line derived neurotrophic factor, Otud7a - otu domain containing 7a, Nlgn2 - neuroligin 2, Mst1r - macrophage stimula…
	GO:0043069	negative regulation of programmed cell death	0.000321	1.68	947	48	[Glp1r - glucagon-like peptide 1 receptor, Gpam - glycerol-3-phosphate acyltransferase, mitochondrial, Aipl1 - aryl hydrocarbon receptor-interacting protein-like 1, Fn1 - fibronectin 1, Aif1 - allograft inflammatory factor 1, Gdnf - glial cell line derived neurotrophic factor, Meis3 - meis homeobox 3, Vegfa - vascular endothelial growth factor a, Mst1r - macrophage stimulating 1 receptor (c-met-r…
	GO:0048878	chemical homeostasis	0.000205	1.67	1031	52	[Ptger4 - prostaglandin e receptor 4 (subtype ep4), Ern1 - endoplasmic reticulum (er) to nucleus signalling 1, Gpam - glycerol-3-phosphate acyltransferase, mitochondrial, Soat2 - sterol o-acyltransferase 2, Trf - transferrin, Lpar1 - lysophosphatidic acid receptor 1, Pthlh - parathyroid hormone-like peptide, Ptk2b - ptk2 protein tyrosine kinase 2 beta, Slc4a4 - solute carrier family 4 (anion exch…
	GO:0051241	negative regulation of multicellular organismal process	7.68e-05	1.65	1248	62	[Cd59a - cd59a antigen, Ptger4 - prostaglandin e receptor 4 (subtype ep4), Errfi1 - erbb receptor feedback inhibitor 1, Fn1 - fibronectin 1, Lpar1 - lysophosphatidic acid receptor 1, Pthlh - parathyroid hormone-like peptide, Ptk2b - ptk2 protein tyrosine kinase 2 beta, Gdf10 - growth differentiation factor 10, Wnt11 - wingless-related mmtv integration site 11, Socs1 - suppressor of cytokine signa…
	GO:1901700	response to oxygen-containing compound	7.15e-05	1.64	1271	63	[Gpam - glycerol-3-phosphate acyltransferase, mitochondrial, Ptger4 - prostaglandin e receptor 4 (subtype ep4), Ern1 - endoplasmic reticulum (er) to nucleus signalling 1, Gdnf - glial cell line derived neurotrophic factor, Lpar1 - lysophosphatidic acid receptor 1, Ptk2b - ptk2 protein tyrosine kinase 2 beta, Palm3 - paralemmin 3, Serpina3n - serine (or cysteine) peptidase inhibitor, clade a, memb…
	GO:0048856	anatomical structure development	4.01e-11	1.63	3337	164	[Ptger4 - prostaglandin e receptor 4 (subtype ep4), Fzd10 - frizzled homolog 10 (drosophila), Errfi1 - erbb receptor feedback inhibitor 1, Unc5c - unc-5 homolog c (c. elegans), Gdnf - glial cell line derived neurotrophic factor, Esrrb - estrogen related receptor, beta, Pthlh - parathyroid hormone-like peptide, Mst1r - macrophage stimulating 1 receptor (c-met-related tyrosine kinase), Gdf10 - grow…
	GO:0050790	regulation of catalytic activity	3.69e-06	1.63	1796	88	[Ern1 - endoplasmic reticulum (er) to nucleus signalling 1, Fzd10 - frizzled homolog 10 (drosophila), Errfi1 - erbb receptor feedback inhibitor 1, Trf - transferrin, Gdnf - glial cell line derived neurotrophic factor, Lpar1 - lysophosphatidic acid receptor 1, Mst1r - macrophage stimulating 1 receptor (c-met-related tyrosine kinase), Fgd4 - fyve, rhogef and ph domain containing 4, Ptk2b - ptk2 pro…
	GO:0010648	negative regulation of cell communication	8.75e-05	1.63	1280	63	[Cd59a - cd59a antigen, Errfi1 - erbb receptor feedback inhibitor 1, Shisa6 - shisa homolog 6 (xenopus laevis), Ppef2 - protein phosphatase, ef hand calcium-binding domain 2, Gdnf - glial cell line derived neurotrophic factor, Otud7a - otu domain containing 7a, Lpar1 - lysophosphatidic acid receptor 1, Mst1r - macrophage stimulating 1 receptor (c-met-related tyrosine kinase), Ptk2b - ptk2 protein…
	GO:0023057	negative regulation of signaling	9.55e-05	1.63	1284	63	[Cd59a - cd59a antigen, Errfi1 - erbb receptor feedback inhibitor 1, Shisa6 - shisa homolog 6 (xenopus laevis), Ppef2 - protein phosphatase, ef hand calcium-binding domain 2, Gdnf - glial cell line derived neurotrophic factor, Otud7a - otu domain containing 7a, Lpar1 - lysophosphatidic acid receptor 1, Mst1r - macrophage stimulating 1 receptor (c-met-related tyrosine kinase), Ptk2b - ptk2 protein…
	GO:0032502	developmental process	4.74e-16	1.61	4840	235	[Camk2a - calcium/calmodulin-dependent protein kinase ii alpha, Ptger4 - prostaglandin e receptor 4 (subtype ep4), Errfi1 - erbb receptor feedback inhibitor 1, Pthlh - parathyroid hormone-like peptide, Mst1r - macrophage stimulating 1 receptor (c-met-related tyrosine kinase), Ptk2b - ptk2 protein tyrosine kinase 2 beta, Ache - acetylcholinesterase, Nrxn1 - neurexin i, Nrtn - neurturin, Snx10 - so…
	GO:0042981	regulation of apoptotic process	3.38e-05	1.61	1500	73	[Gpam - glycerol-3-phosphate acyltransferase, mitochondrial, Aipl1 - aryl hydrocarbon receptor-interacting protein-like 1, Camk2a - calcium/calmodulin-dependent protein kinase ii alpha, Fn1 - fibronectin 1, Unc5c - unc-5 homolog c (c. elegans), Aif1 - allograft inflammatory factor 1, Gdnf - glial cell line derived neurotrophic factor, Lpar1 - lysophosphatidic acid receptor 1, Mst1r - macrophage s…
	GO:0043067	regulation of programmed cell death	4.86e-05	1.6	1517	73	[Gpam - glycerol-3-phosphate acyltransferase, mitochondrial, Aipl1 - aryl hydrocarbon receptor-interacting protein-like 1, Camk2a - calcium/calmodulin-dependent protein kinase ii alpha, Fn1 - fibronectin 1, Unc5c - unc-5 homolog c (c. elegans), Aif1 - allograft inflammatory factor 1, Gdnf - glial cell line derived neurotrophic factor, Lpar1 - lysophosphatidic acid receptor 1, Mst1r - macrophage s…
	GO:0035556	intracellular signal transduction	0.00024	1.58	1301	62	[Ptger4 - prostaglandin e receptor 4 (subtype ep4), Ern1 - endoplasmic reticulum (er) to nucleus signalling 1, Errfi1 - erbb receptor feedback inhibitor 1, Myo16 - myosin xvi, Edaradd - edar (ectodysplasin-a receptor)-associated death domain, Car8 - carbonic anhydrase 8, Aif1 - allograft inflammatory factor 1, Trf - transferrin, Jak1 - janus kinase 1, Pthlh - parathyroid hormone-like peptide, Ptk…
	GO:0009968	negative regulation of signal transduction	0.000887	1.56	1152	54	[Cd59a - cd59a antigen, Shisa6 - shisa homolog 6 (xenopus laevis), Errfi1 - erbb receptor feedback inhibitor 1, Ppef2 - protein phosphatase, ef hand calcium-binding domain 2, Gdnf - glial cell line derived neurotrophic factor, Otud7a - otu domain containing 7a, Lpar1 - lysophosphatidic acid receptor 1, Mst1r - macrophage stimulating 1 receptor (c-met-related tyrosine kinase), Wnt11 - wingless-rel…
	GO:0048869	cellular developmental process	4.1e-08	1.55	3019	141	[Ptger4 - prostaglandin e receptor 4 (subtype ep4), Camk2a - calcium/calmodulin-dependent protein kinase ii alpha, Myo16 - myosin xvi, Gdnf - glial cell line derived neurotrophic factor, Mreg - melanoregulin, Esrrb - estrogen related receptor, beta, Pthlh - parathyroid hormone-like peptide, Mst1r - macrophage stimulating 1 receptor (c-met-related tyrosine kinase), Ptk2b - ptk2 protein tyrosine ki…
	GO:0051128	regulation of cellular component organization	1.18e-06	1.55	2415	113	[Ptger4 - prostaglandin e receptor 4 (subtype ep4), Fzd10 - frizzled homolog 10 (drosophila), Nlgn2 - neuroligin 2, Ptk2b - ptk2 protein tyrosine kinase 2 beta, Postn - periostin, osteoblast specific factor, Nrxn1 - neurexin i, Ache - acetylcholinesterase, Rtn4rl2 - reticulon 4 receptor-like 2, Cxcl16 - chemokine (c-x-c motif) ligand 16, Fhod3 - formin homology 2 domain containing 3, Il1rapl1 - i…
	GO:0071310	cellular response to organic substance	0.000176	1.55	1500	70	[Gpam - glycerol-3-phosphate acyltransferase, mitochondrial, Ptger4 - prostaglandin e receptor 4 (subtype ep4), Ern1 - endoplasmic reticulum (er) to nucleus signalling 1, Fn1 - fibronectin 1, Gdnf - glial cell line derived neurotrophic factor, Jak1 - janus kinase 1, Lpar1 - lysophosphatidic acid receptor 1, Sp5 - trans-acting transcription factor 5, Ptk2b - ptk2 protein tyrosine kinase 2 beta, En…
	GO:0032268	regulation of cellular protein metabolic process	2.03e-06	1.54	2415	112	[Ptger4 - prostaglandin e receptor 4 (subtype ep4), Errfi1 - erbb receptor feedback inhibitor 1, Fzd10 - frizzled homolog 10 (drosophila), Gdnf - glial cell line derived neurotrophic factor, Mst1r - macrophage stimulating 1 receptor (c-met-related tyrosine kinase), Ptk2b - ptk2 protein tyrosine kinase 2 beta, Gdf10 - growth differentiation factor 10, Marco - macrophage receptor with collagenous s…
	GO:0030154	cell differentiation	8.75e-06	1.54	2161	100	[Ptger4 - prostaglandin e receptor 4 (subtype ep4), Gdnf - glial cell line derived neurotrophic factor, Mreg - melanoregulin, Pthlh - parathyroid hormone-like peptide, Mst1r - macrophage stimulating 1 receptor (c-met-related tyrosine kinase), Ptk2b - ptk2 protein tyrosine kinase 2 beta, Gdf10 - growth differentiation factor 10, Myo1e - myosin ie, Nrxn1 - neurexin i, Socs1 - suppressor of cytokine…
	GO:0070887	cellular response to chemical stimulus	8.53e-05	1.53	1761	81	[Ptger4 - prostaglandin e receptor 4 (subtype ep4), Ern1 - endoplasmic reticulum (er) to nucleus signalling 1, Gpam - glycerol-3-phosphate acyltransferase, mitochondrial, Abtb2 - ankyrin repeat and btb (poz) domain containing 2, Fn1 - fibronectin 1, Trf - transferrin, Gdnf - glial cell line derived neurotrophic factor, Jak1 - janus kinase 1, Lpar1 - lysophosphatidic acid receptor 1, Sp5 - trans-a…
	GO:0042592	homeostatic process	0.000373	1.53	1431	66	[Gpam - glycerol-3-phosphate acyltransferase, mitochondrial, Aipl1 - aryl hydrocarbon receptor-interacting protein-like 1, Ern1 - endoplasmic reticulum (er) to nucleus signalling 1, Ptger4 - prostaglandin e receptor 4 (subtype ep4), Soat2 - sterol o-acyltransferase 2, Trf - transferrin, Lpar1 - lysophosphatidic acid receptor 1, Pthlh - parathyroid hormone-like peptide, Ptk2b - ptk2 protein tyrosi…
	GO:0010941	regulation of cell death	0.000175	1.52	1663	76	[Aipl1 - aryl hydrocarbon receptor-interacting protein-like 1, Camk2a - calcium/calmodulin-dependent protein kinase ii alpha, Gpam - glycerol-3-phosphate acyltransferase, mitochondrial, Unc5c - unc-5 homolog c (c. elegans), Fn1 - fibronectin 1, Aif1 - allograft inflammatory factor 1, Gdnf - glial cell line derived neurotrophic factor, Lpar1 - lysophosphatidic acid receptor 1, Mst1r - macrophage s…
	GO:0065009	regulation of molecular function	6.67e-06	1.51	2422	110	[Camk2a - calcium/calmodulin-dependent protein kinase ii alpha, Errfi1 - erbb receptor feedback inhibitor 1, Fzd10 - frizzled homolog 10 (drosophila), Gdnf - glial cell line derived neurotrophic factor, Pthlh - parathyroid hormone-like peptide, Nlgn2 - neuroligin 2, Mst1r - macrophage stimulating 1 receptor (c-met-related tyrosine kinase), Ptk2b - ptk2 protein tyrosine kinase 2 beta, Kcnj1 - pota…
	GO:0051246	regulation of protein metabolic process	4.25e-06	1.5	2592	117	[Ptger4 - prostaglandin e receptor 4 (subtype ep4), Errfi1 - erbb receptor feedback inhibitor 1, Fzd10 - frizzled homolog 10 (drosophila), Gdnf - glial cell line derived neurotrophic factor, Mst1r - macrophage stimulating 1 receptor (c-met-related tyrosine kinase), Ptk2b - ptk2 protein tyrosine kinase 2 beta, Gdf10 - growth differentiation factor 10, Marco - macrophage receptor with collagenous s…
	GO:0010033	response to organic substance	3.11e-05	1.48	2257	101	[Ptger4 - prostaglandin e receptor 4 (subtype ep4), Gdnf - glial cell line derived neurotrophic factor, Ptk2b - ptk2 protein tyrosine kinase 2 beta, Socs1 - suppressor of cytokine signaling 1, Snx10 - sorting nexin 10, Cxcl16 - chemokine (c-x-c motif) ligand 16, P2ry13 - purinergic receptor p2y, g-protein coupled 13, Pycard - pyd and card domain containing, C5ar1 - complement component 5a recepto…
	GO:0048522	positive regulation of cellular process	7.36e-11	1.47	5091	225	[Npas3 - neuronal pas domain protein 3, Camk2a - calcium/calmodulin-dependent protein kinase ii alpha, Ptger4 - prostaglandin e receptor 4 (subtype ep4), Ikzf2 - ikaros family zinc finger 2, Pthlh - parathyroid hormone-like peptide, Mst1r - macrophage stimulating 1 receptor (c-met-related tyrosine kinase), Ptk2b - ptk2 protein tyrosine kinase 2 beta, Marco - macrophage receptor with collagenous s…
	GO:0065008	regulation of biological quality	1.84e-07	1.47	3489	155	[Camk2a - calcium/calmodulin-dependent protein kinase ii alpha, Aipl1 - aryl hydrocarbon receptor-interacting protein-like 1, Ptger4 - prostaglandin e receptor 4 (subtype ep4), Gpr119 - g-protein coupled receptor 119, Gdnf - glial cell line derived neurotrophic factor, Nlgn2 - neuroligin 2, Pthlh - parathyroid hormone-like peptide, Ptk2b - ptk2 protein tyrosine kinase 2 beta, Steap1 - six transme…
	GO:0048518	positive regulation of biological process	7.14e-12	1.45	5709	250	[Npas3 - neuronal pas domain protein 3, Camk2a - calcium/calmodulin-dependent protein kinase ii alpha, Ptger4 - prostaglandin e receptor 4 (subtype ep4), Ikzf2 - ikaros family zinc finger 2, Pthlh - parathyroid hormone-like peptide, Mst1r - macrophage stimulating 1 receptor (c-met-related tyrosine kinase), Ptk2b - ptk2 protein tyrosine kinase 2 beta, H2-T10 - histocompatibility 2, t region locus …
	GO:0042221	response to chemical	1.91e-05	1.45	2706	118	[Ptger4 - prostaglandin e receptor 4 (subtype ep4), Gdnf - glial cell line derived neurotrophic factor, Ptk2b - ptk2 protein tyrosine kinase 2 beta, Kcnj1 - potassium inwardly-rectifying channel, subfamily j, member 1, Postn - periostin, osteoblast specific factor, Nrxn1 - neurexin i, Socs1 - suppressor of cytokine signaling 1, Snx10 - sorting nexin 10, Mt1 - metallothionein 1, Cxcl16 - chemokine…
	GO:0007165	signal transduction	2.93e-08	1.42	4568	196	[Camk2a - calcium/calmodulin-dependent protein kinase ii alpha, Ptger4 - prostaglandin e receptor 4 (subtype ep4), Errfi1 - erbb receptor feedback inhibitor 1, Gpr119 - g-protein coupled receptor 119, Car8 - carbonic anhydrase 8, Pthlh - parathyroid hormone-like peptide, Mst1r - macrophage stimulating 1 receptor (c-met-related tyrosine kinase), Ptk2b - ptk2 protein tyrosine kinase 2 beta, Marco -…
	GO:0006950	response to stress	7.94e-05	1.42	2595	111	[Ptger4 - prostaglandin e receptor 4 (subtype ep4), Camk2a - calcium/calmodulin-dependent protein kinase ii alpha, Errfi1 - erbb receptor feedback inhibitor 1, Gdnf - glial cell line derived neurotrophic factor, Cfp - complement factor properdin, Mst1r - macrophage stimulating 1 receptor (c-met-related tyrosine kinase), Ptk2b - ptk2 protein tyrosine kinase 2 beta, Marco - macrophage receptor with…
	GO:0010604	positive regulation of macromolecule metabolic process	6.52e-05	1.38	3071	128	[Ptger4 - prostaglandin e receptor 4 (subtype ep4), Npas3 - neuronal pas domain protein 3, Fzd10 - frizzled homolog 10 (drosophila), Ikzf2 - ikaros family zinc finger 2, Gdnf - glial cell line derived neurotrophic factor, Esrrb - estrogen related receptor, beta, Mst1r - macrophage stimulating 1 receptor (c-met-related tyrosine kinase), Ptk2b - ptk2 protein tyrosine kinase 2 beta, Gdf10 - growth d…
	GO:0050896	response to stimulus	2.23e-07	1.37	4928	204	[Camk2a - calcium/calmodulin-dependent protein kinase ii alpha, Ptger4 - prostaglandin e receptor 4 (subtype ep4), Npas3 - neuronal pas domain protein 3, Errfi1 - erbb receptor feedback inhibitor 1, Otud7a - otu domain containing 7a, Mst1r - macrophage stimulating 1 receptor (c-met-related tyrosine kinase), Ptk2b - ptk2 protein tyrosine kinase 2 beta, H2-T10 - histocompatibility 2, t region locus…
	GO:0032501	multicellular organismal process	2.41e-06	1.36	4579	187	[Npas3 - neuronal pas domain protein 3, Ptger4 - prostaglandin e receptor 4 (subtype ep4), Aipl1 - aryl hydrocarbon receptor-interacting protein-like 1, Fzd10 - frizzled homolog 10 (drosophila), Unc5c - unc-5 homolog c (c. elegans), Gdnf - glial cell line derived neurotrophic factor, Sgcz - sarcoglycan zeta, Esrrb - estrogen related receptor, beta, Nlgn2 - neuroligin 2, Pthlh - parathyroid hormon…
	GO:0009893	positive regulation of metabolic process	7.55e-05	1.36	3285	135	[Npas3 - neuronal pas domain protein 3, Ptger4 - prostaglandin e receptor 4 (subtype ep4), Fzd10 - frizzled homolog 10 (drosophila), Ikzf2 - ikaros family zinc finger 2, Gdnf - glial cell line derived neurotrophic factor, Esrrb - estrogen related receptor, beta, Mst1r - macrophage stimulating 1 receptor (c-met-related tyrosine kinase), Ptk2b - ptk2 protein tyrosine kinase 2 beta, Gdf10 - growth d…
	GO:0031325	positive regulation of cellular metabolic process	0.00017	1.36	3051	125	[Ptger4 - prostaglandin e receptor 4 (subtype ep4), Npas3 - neuronal pas domain protein 3, Fzd10 - frizzled homolog 10 (drosophila), Ikzf2 - ikaros family zinc finger 2, Gdnf - glial cell line derived neurotrophic factor, Esrrb - estrogen related receptor, beta, Mst1r - macrophage stimulating 1 receptor (c-met-related tyrosine kinase), Ptk2b - ptk2 protein tyrosine kinase 2 beta, Gdf10 - growth d…
	GO:0051173	positive regulation of nitrogen compound metabolic process	0.00023	1.36	2927	120	[Ptger4 - prostaglandin e receptor 4 (subtype ep4), Npas3 - neuronal pas domain protein 3, Fzd10 - frizzled homolog 10 (drosophila), Ikzf2 - ikaros family zinc finger 2, Gdnf - glial cell line derived neurotrophic factor, Esrrb - estrogen related receptor, beta, Mst1r - macrophage stimulating 1 receptor (c-met-related tyrosine kinase), Ptk2b - ptk2 protein tyrosine kinase 2 beta, Gdf10 - growth d…
	GO:0016043	cellular component organization	3.06e-06	1.35	4536	185	[Dydc1 - dpy30 domain containing 1, Camk2a - calcium/calmodulin-dependent protein kinase ii alpha, Myo16 - myosin xvi, Gdnf - glial cell line derived neurotrophic factor, Sgcz - sarcoglycan zeta, Esrrb - estrogen related receptor, beta, Nlgn2 - neuroligin 2, Ptk2b - ptk2 protein tyrosine kinase 2 beta, Decr1 - 2,4-dienoyl coa reductase 1, mitochondrial, Myo1e - myosin ie, Postn - periostin, osteo…
	GO:0051234	establishment of localization	0.000151	1.35	3247	132	[Camk2a - calcium/calmodulin-dependent protein kinase ii alpha, Gpr119 - g-protein coupled receptor 119, Mreg - melanoregulin, Steap1 - six transmembrane epithelial antigen of the prostate 1, Kcnj1 - potassium inwardly-rectifying channel, subfamily j, member 1, Myo1e - myosin ie, Marco - macrophage receptor with collagenous structure, Car9 - carbonic anhydrase 9, Ccdc155 - coiled-coil domain cont…
	GO:0006810	transport	0.000186	1.35	3116	127	[Camk2a - calcium/calmodulin-dependent protein kinase ii alpha, Gpr119 - g-protein coupled receptor 119, Mreg - melanoregulin, Steap1 - six transmembrane epithelial antigen of the prostate 1, Kcnj1 - potassium inwardly-rectifying channel, subfamily j, member 1, Myo1e - myosin ie, Marco - macrophage receptor with collagenous structure, Car9 - carbonic anhydrase 9, Ache - acetylcholinesterase, Nrxn…
	GO:0071840	cellular component organization or biogenesis	6.08e-06	1.34	4614	186	[Dydc1 - dpy30 domain containing 1, Camk2a - calcium/calmodulin-dependent protein kinase ii alpha, Myo16 - myosin xvi, Gdnf - glial cell line derived neurotrophic factor, Sgcz - sarcoglycan zeta, Esrrb - estrogen related receptor, beta, Nlgn2 - neuroligin 2, Ptk2b - ptk2 protein tyrosine kinase 2 beta, Decr1 - 2,4-dienoyl coa reductase 1, mitochondrial, Myo1e - myosin ie, Postn - periostin, osteo…
	GO:0048519	negative regulation of biological process	2.36e-06	1.33	5027	202	[Ptger4 - prostaglandin e receptor 4 (subtype ep4), Dydc1 - dpy30 domain containing 1, Errfi1 - erbb receptor feedback inhibitor 1, Otud7a - otu domain containing 7a, Pthlh - parathyroid hormone-like peptide, Mst1r - macrophage stimulating 1 receptor (c-met-related tyrosine kinase), Ptk2b - ptk2 protein tyrosine kinase 2 beta, Nrxn1 - neurexin i, Best3 - bestrophin 3, Rtn4rl2 - reticulon 4 recept…
	GO:0048523	negative regulation of cellular process	7.1e-05	1.3	4500	176	[Dydc1 - dpy30 domain containing 1, Ptger4 - prostaglandin e receptor 4 (subtype ep4), Aipl1 - aryl hydrocarbon receptor-interacting protein-like 1, Errfi1 - erbb receptor feedback inhibitor 1, Gdnf - glial cell line derived neurotrophic factor, Otud7a - otu domain containing 7a, Esrrb - estrogen related receptor, beta, Pthlh - parathyroid hormone-like peptide, Mst1r - macrophage stimulating 1 re…
	GO:0051179	localization	0.000288	1.3	3742	147	[Camk2a - calcium/calmodulin-dependent protein kinase ii alpha, Gpr119 - g-protein coupled receptor 119, Mreg - melanoregulin, Nlgn2 - neuroligin 2, Steap1 - six transmembrane epithelial antigen of the prostate 1, Kcnj1 - potassium inwardly-rectifying channel, subfamily j, member 1, Myo1e - myosin ie, Marco - macrophage receptor with collagenous structure, Car9 - carbonic anhydrase 9, Ccdc155 - c…
	GO:0050789	regulation of biological process	6.14e-12	1.25	11210	422	[Ptger4 - prostaglandin e receptor 4 (subtype ep4), Errfi1 - erbb receptor feedback inhibitor 1, Gpr119 - g-protein coupled receptor 119, Ikzf2 - ikaros family zinc finger 2, Pthlh - parathyroid hormone-like peptide, Ptk2b - ptk2 protein tyrosine kinase 2 beta, H2-T10 - histocompatibility 2, t region locus 10, Marco - macrophage receptor with collagenous structure, Ache - acetylcholinesterase, Da…
	GO:0050794	regulation of cellular process	5.04e-11	1.25	10556	399	[Ptger4 - prostaglandin e receptor 4 (subtype ep4), Errfi1 - erbb receptor feedback inhibitor 1, Gpr119 - g-protein coupled receptor 119, Ikzf2 - ikaros family zinc finger 2, Pthlh - parathyroid hormone-like peptide, Ptk2b - ptk2 protein tyrosine kinase 2 beta, Marco - macrophage receptor with collagenous structure, Ache - acetylcholinesterase, Rtn4rl2 - reticulon 4 receptor-like 2, Ackr4 - atypi…
	GO:0065007	biological regulation	2.94e-11	1.23	11791	436	[Ptger4 - prostaglandin e receptor 4 (subtype ep4), Errfi1 - erbb receptor feedback inhibitor 1, Gpr119 - g-protein coupled receptor 119, Ikzf2 - ikaros family zinc finger 2, Pthlh - parathyroid hormone-like peptide, Ptk2b - ptk2 protein tyrosine kinase 2 beta, Steap1 - six transmembrane epithelial antigen of the prostate 1, H2-T10 - histocompatibility 2, t region locus 10, Marco - macrophage rec…
	GO:0019222	regulation of metabolic process	0.000775	1.2	5924	215	[Camk2a - calcium/calmodulin-dependent protein kinase ii alpha, Ptger4 - prostaglandin e receptor 4 (subtype ep4), Dydc1 - dpy30 domain containing 1, Npas3 - neuronal pas domain protein 3, Errfi1 - erbb receptor feedback inhibitor 1, Ikzf2 - ikaros family zinc finger 2, Pthlh - parathyroid hormone-like peptide, Mst1r - macrophage stimulating 1 receptor (c-met-related tyrosine kinase), Ptk2b - ptk…
	GO:0009987	cellular process	0.00059	1.09	14092	463	[Ptger4 - prostaglandin e receptor 4 (subtype ep4), Gpr119 - g-protein coupled receptor 119, Cyp4b1 - cytochrome p450, family 4, subfamily b, polypeptide 1, Errfi1 - erbb receptor feedback inhibitor 1, Ikzf2 - ikaros family zinc finger 2, Pthlh - parathyroid hormone-like peptide, Ptk2b - ptk2 protein tyrosine kinase 2 beta, Marco - macrophage receptor with collagenous structure, Tgm5 - transgluta…
	Molecular Function
	GO Term	Description	P-adj value	Enrichment Score	B (number of GO members)	b (number of 5X-DEG overlap with GO members)	5X-DEG
ECM Components & Cell-Adhesion Molecules (Figure 2)	GO:0050840	extracellular matrix binding	7.26e-05	4.98	60	9	[Spock1 - sparc/osteonectin, cwcv and kazal-like domains proteoglycan 1, Ntn4 - netrin 4, Spock3 - sparc/osteonectin, cwcv and kazal-like domains proteoglycan 3, Ache - acetylcholinesterase, Slit2 - slit homolog 2 (drosophila), Itga2b - integrin alpha 2b, Vegfa - vascular endothelial growth factor a, Adam9 - a disintegrin and metallopeptidase domain 9 (meltrin gamma), Smoc1 - sparc related modula…
	GO:0005201	extracellular matrix structural constituent	0.000258	4.74	56	8	[Colq - collagen-like tail subunit (single strand of homotrimer) of asymmetric acetylcholinesterase, Tectb - tectorin beta, Col24a1 - collagen, type xxiv, alpha 1, Col22a1 - collagen, type xxii, alpha 1, Emilin1 - elastin microfibril interfacer 1, Col16a1 - collagen, type xvi, alpha 1, Col27a1 - collagen, type xxvii, alpha 1, Marco - macrophage receptor with collagenous structure]
	GO:0050839	cell adhesion molecule binding	3.99e-08	3.58	232	25	[Fn1 - fibronectin 1, Edil3 - egf-like repeats and discoidin i-like domains 3, Obscn - obscurin, cytoskeletal calmodulin and titin-interacting rhogef, Nlgn2 - neuroligin 2, Adam9 - a disintegrin and metallopeptidase domain 9 (meltrin gamma), Postn - periostin, osteoblast specific factor, Fermt3 - fermitin family homolog 3 (drosophila), Nrxn1 - neurexin i, Src - rous sarcoma oncogene, Cpe - carbox…
	GO:0070492	oligosaccharide binding	0.000333	7.9	21	5	[Edil3 - egf-like repeats and discoidin i-like domains 3, Reg3b - regenerating islet-derived 3 beta, F5 - coagulation factor v, Colec11 - collectin sub-family member 11, F8 - coagulation factor viii]
	GO:0043394	proteoglycan binding	4.71e-05	7.04	33	7	[Lrrtm4 - leucine rich repeat transmembrane neuronal 4, Slit1 - slit homolog 1 (drosophila), Slit2 - slit homolog 2 (drosophila), Tnc - tenascin c, Psg22 - pregnancy-specific glycoprotein 22, Hpse - heparanase, Ctsk - cathepsin k]
	GO:0005109	frizzled binding	0.000235	5.53	42	7	[Sfrp1 - secreted frizzled-related protein 1, Wnt5b - wingless-related mmtv integration site 5b, Wnt6 - wingless-related mmtv integration site 6, Fzd7 - frizzled homolog 7 (drosophila), Wnt10a - wingless related mmtv integration site 10a, Wnt11 - wingless-related mmtv integration site 11, Fzd1 - frizzled homolog 1 (drosophila)]
	GO:0005518	collagen binding	0.000137	4.59	65	9	[Spock1 - sparc/osteonectin, cwcv and kazal-like domains proteoglycan 1, Spock3 - sparc/osteonectin, cwcv and kazal-like domains proteoglycan 3, Ache - acetylcholinesterase, Mmp13 - matrix metallopeptidase 13, Pdgfa - platelet derived growth factor, alpha, Coch - coagulation factor c homolog (limulus polyphemus), Ctsk - cathepsin k, Adam9 - a disintegrin and metallopeptidase domain 9 (meltrin gam…
Cytokine & Cytokine Receptors (Figure 4 & 5)	GO:0070700	BMP receptor binding	0.000228	12.07	11	4	[Pycard - pyd and card domain containing, Bmp8a - bone morphogenetic protein 8a, Bmp2 - bone morphogenetic protein 2, Bmp3 - bone morphogenetic protein 3]
	GO:0004896	cytokine receptor activity	2.53e-05	4.24	94	12	[Il13ra2 - interleukin 13 receptor, alpha 2, Xcr1 - chemokine (c motif) receptor 1, Csf3r - colony stimulating factor 3 receptor (granulocyte), Ackr4 - atypical chemokine receptor 4, Epor - erythropoietin receptor, Ccr3 - chemokine (c-c motif) receptor 3, Il27ra - interleukin 27 receptor, alpha, Gfra4 - glial cell line derived neurotrophic factor family receptor alpha 4, Il21r - interleukin 21 re…
	GO:0070851	growth factor receptor binding	3.07e-05	3.46	144	15	[Ern1 - endoplasmic reticulum (er) to nucleus signalling 1, Pycard - pyd and card domain containing, Gdnf - glial cell line derived neurotrophic factor, Vegfa - vascular endothelial growth factor a, Pdgfa - platelet derived growth factor, alpha, Tgfa - transforming growth factor alpha, Flrt2 - fibronectin leucine rich transmembrane protein 2, Il1rn - interleukin 1 receptor antagonist, Flrt3 - fib…
	GO:0008083	growth factor activity	0.000148	3.16	147	14	[Gdnf - glial cell line derived neurotrophic factor, Vegfa - vascular endothelial growth factor a, Pdgfa - platelet derived growth factor, alpha, Bmp3 - bone morphogenetic protein 3, Gdf10 - growth differentiation factor 10, Tgfa - transforming growth factor alpha, Bmp8a - bone morphogenetic protein 8a, Csf2 - colony stimulating factor 2 (granulocyte-macrophage), Nrtn - neurturin, Igf1 - insulin-…
	GO:0005125	cytokine activity	9.09e-05	2.79	214	18	[Ccl20 - chemokine (c-c motif) ligand 20, Ccl24 - chemokine (c-c motif) ligand 24, Ccl12 - chemokine (c-c motif) ligand 12, Vegfa - vascular endothelial growth factor a, Bmp3 - bone morphogenetic protein 3, Gdf10 - growth differentiation factor 10, Ccl9 - chemokine (c-c motif) ligand 9, Bmp8a - bone morphogenetic protein 8a, Csf2 - colony stimulating factor 2 (granulocyte-macrophage), Ltb - lymph…
	GO:0005126	cytokine receptor binding	1.59e-05	2.58	321	25	[Edaradd - edar (ectodysplasin-a receptor)-associated death domain, Gdnf - glial cell line derived neurotrophic factor, Ccl24 - chemokine (c-c motif) ligand 24, Jak1 - janus kinase 1, Vegfa - vascular endothelial growth factor a, Bmp3 - bone morphogenetic protein 3, Gdf10 - growth differentiation factor 10, Ccl9 - chemokine (c-c motif) ligand 9, Ltb - lymphotoxin b, Bmp8a - bone morphogenetic pro…
Exogenous Material Acquisition (Figure 7)	GO:0005044	scavenger receptor activity	6.51e-06	6.64	45	9	[Loxl4 - lysyl oxidase-like 4, Cfi - complement component factor i, Cd5l - cd5 antigen-like, Cxcl16 - chemokine (c-x-c motif) ligand 16, Ackr4 - atypical chemokine receptor 4, Msr1 - macrophage scavenger receptor 1, Stab2 - stabilin 2, Cd6 - cd6 antigen, Marco - macrophage receptor with collagenous structure]
	GO:0038024	cargo receptor activity	3.43e-05	4.45	82	11	[Loxl4 - lysyl oxidase-like 4, Cfi - complement component factor i, Snap91 - synaptosomal-associated protein 91, Cd5l - cd5 antigen-like, Ackr4 - atypical chemokine receptor 4, Cxcl16 - chemokine (c-x-c motif) ligand 16, Msr1 - macrophage scavenger receptor 1, Siglech - sialic acid binding ig-like lectin h, Stab2 - stabilin 2, Cd6 - cd6 antigen, Marco - macrophage receptor with collagenous struct…
Other GO Terms	GO:0005042	netrin receptor activity	0.000509	16.59	6	3	[Unc5c - unc-5 homolog c (c. elegans), Dcc - deleted in colorectal carcinoma, Unc5a - unc-5 homolog a (c. elegans)]
	GO:0034483	heparan sulfate sulfotransferase activity	0.000643	9.48	14	4	[Hs3st3a1 - heparan sulfate (glucosamine) 3-o-sulfotransferase 3a1, Hs6st3 - heparan sulfate 6-o-sulfotransferase 3, Hs6st2 - heparan sulfate 6-o-sulfotransferase 2, Hs3st5 - heparan sulfate (glucosamine) 3-o-sulfotransferase 5]
	GO:0070403	NAD+ binding	0.000643	9.48	14	4	[Aldh1a3 - aldehyde dehydrogenase family 1, subfamily a3, Uxs1 - udp-glucuronate decarboxylase 1, Hpgd - hydroxyprostaglandin dehydrogenase 15 (nad), Parp14 - poly (adp-ribose) polymerase family, member 14]
	GO:0070696	transmembrane receptor protein serine/threonine kinase binding	0.000151	9.22	18	5	[Pycard - pyd and card domain containing, Bmp8a - bone morphogenetic protein 8a, Cfc1 - cripto, frl-1, cryptic family 1, Bmp2 - bone morphogenetic protein 2, Bmp3 - bone morphogenetic protein 3]
	GO:0022843	voltage-gated cation channel activity	1.32e-07	4.42	135	18	[Kcnc3 - potassium voltage gated channel, shaw-related subfamily, member 3, Kcnc1 - potassium voltage gated channel, shaw-related subfamily, member 1, Kcnh3 - potassium voltage-gated channel, subfamily h (eag-related), member 3, Hcn1 - hyperpolarization-activated, cyclic nucleotide-gated k+ 1, Ptk2b - ptk2 protein tyrosine kinase 2 beta, Kcnj2 - potassium inwardly-rectifying channel, subfamily j,…
	GO:0005249	voltage-gated potassium channel activity	0.000236	3.9	85	10	[Kcnc3 - potassium voltage gated channel, shaw-related subfamily, member 3, Kcna2 - potassium voltage-gated channel, shaker-related subfamily, member 2, Kcnc1 - potassium voltage gated channel, shaw-related subfamily, member 1, Kcnh3 - potassium voltage-gated channel, subfamily h (eag-related), member 3, Hcn1 - hyperpolarization-activated, cyclic nucleotide-gated k+ 1, Kcnj2 - potassium inwardly-…
	GO:0099094	ligand-gated cation channel activity	0.000178	3.72	98	11	[Gria3 - glutamate receptor, ionotropic, ampa3 (alpha 3), Gria4 - glutamate receptor, ionotropic, ampa4 (alpha 4), Chrna3 - cholinergic receptor, nicotinic, alpha polypeptide 3, P2rx2 - purinergic receptor p2x, ligand-gated ion channel, 2, Grin2c - glutamate receptor, ionotropic, nmda2c (epsilon 3), Trpm2 - transient receptor potential cation channel, subfamily m, member 2, Jph3 - junctophilin 3,…
	GO:0022832	voltage-gated channel activity	2.5e-06	3.48	181	19	[Kcnc3 - potassium voltage gated channel, shaw-related subfamily, member 3, Kcnc1 - potassium voltage gated channel, shaw-related subfamily, member 1, Kcnh3 - potassium voltage-gated channel, subfamily h (eag-related), member 3, Hcn1 - hyperpolarization-activated, cyclic nucleotide-gated k+ 1, Ptk2b - ptk2 protein tyrosine kinase 2 beta, Kcnj2 - potassium inwardly-rectifying channel, subfamily j,…
	GO:0005244	voltage-gated ion channel activity	2.5e-06	3.48	181	19	[Kcnc3 - potassium voltage gated channel, shaw-related subfamily, member 3, Kcnc1 - potassium voltage gated channel, shaw-related subfamily, member 1, Kcnh3 - potassium voltage-gated channel, subfamily h (eag-related), member 3, Hcn1 - hyperpolarization-activated, cyclic nucleotide-gated k+ 1, Ptk2b - ptk2 protein tyrosine kinase 2 beta, Kcnj2 - potassium inwardly-rectifying channel, subfamily j,…
	GO:0004866	endopeptidase inhibitor activity	0.000102	2.98	178	16	[C3 - complement component 3, Vil1 - villin 1, A2m - alpha-2-macroglobulin, Hc - hemolytic complement, Serpina11 - serine (or cysteine) peptidase inhibitor, clade a (alpha-1 antiproteinase, antitrypsin), member 11, Stfa3 - stefin a3, Spock1 - sparc/osteonectin, cwcv and kazal-like domains proteoglycan 1, Spock3 - sparc/osteonectin, cwcv and kazal-like domains proteoglycan 3, Serpina3n - serine (o…
	GO:0022839	ion gated channel activity	6.93e-07	2.93	306	27	[Hcn1 - hyperpolarization-activated, cyclic nucleotide-gated k+ 1, Ptk2b - ptk2 protein tyrosine kinase 2 beta, Kcnj1 - potassium inwardly-rectifying channel, subfamily j, member 1, Kcna2 - potassium voltage-gated channel, shaker-related subfamily, member 2, P2rx2 - purinergic receptor p2x, ligand-gated ion channel, 2, Cacng4 - calcium channel, voltage-dependent, gamma subunit 4, Trpm2 - transien…
	GO:0005261	cation channel activity	1.46e-06	2.89	299	26	[Hcn1 - hyperpolarization-activated, cyclic nucleotide-gated k+ 1, Ptk2b - ptk2 protein tyrosine kinase 2 beta, Kcnj1 - potassium inwardly-rectifying channel, subfamily j, member 1, Kcna2 - potassium voltage-gated channel, shaker-related subfamily, member 2, P2rx2 - purinergic receptor p2x, ligand-gated ion channel, 2, Cacng4 - calcium channel, voltage-dependent, gamma subunit 4, Scn11a - sodium …
	GO:0061135	endopeptidase regulator activity	0.00015	2.89	184	16	[C3 - complement component 3, Vil1 - villin 1, A2m - alpha-2-macroglobulin, Hc - hemolytic complement, Serpina11 - serine (or cysteine) peptidase inhibitor, clade a (alpha-1 antiproteinase, antitrypsin), member 11, Stfa3 - stefin a3, Spock1 - sparc/osteonectin, cwcv and kazal-like domains proteoglycan 1, Spock3 - sparc/osteonectin, cwcv and kazal-like domains proteoglycan 3, Serpinb11 - serine (o…
	GO:0022836	gated channel activity	1.22e-06	2.84	315	27	[Hcn1 - hyperpolarization-activated, cyclic nucleotide-gated k+ 1, Ptk2b - ptk2 protein tyrosine kinase 2 beta, Kcnj1 - potassium inwardly-rectifying channel, subfamily j, member 1, Kcna2 - potassium voltage-gated channel, shaker-related subfamily, member 2, P2rx2 - purinergic receptor p2x, ligand-gated ion channel, 2, Cacng4 - calcium channel, voltage-dependent, gamma subunit 4, Scn11a - sodium …
	GO:0030246	carbohydrate binding	8.73e-06	2.82	271	23	[Siglec1 - sialic acid binding ig-like lectin 1, sialoadhesin, Zg16 - zymogen granule protein 16, Edil3 - egf-like repeats and discoidin i-like domains 3, Clec1b - c-type lectin domain family 1, member b, Clec4e - c-type lectin domain family 4, member e, Klrb1f - killer cell lectin-like receptor subfamily b member 1f, Bcan - brevican, Reg3b - regenerating islet-derived 3 beta, Clec4g - c-type lec…
	GO:0030414	peptidase inhibitor activity	0.000409	2.64	201	16	[C3 - complement component 3, A2m - alpha-2-macroglobulin, Vil1 - villin 1, Hc - hemolytic complement, Serpina11 - serine (or cysteine) peptidase inhibitor, clade a (alpha-1 antiproteinase, antitrypsin), member 11, Stfa3 - stefin a3, Spock1 - sparc/osteonectin, cwcv and kazal-like domains proteoglycan 1, Serpinb11 - serine (or cysteine) peptidase inhibitor, clade b (ovalbumin), member 11, Spock3 …
	GO:0061134	peptidase regulator activity	0.000237	2.59	231	18	[C3 - complement component 3, A2m - alpha-2-macroglobulin, Vil1 - villin 1, Pycard - pyd and card domain containing, Fn1 - fibronectin 1, Hc - hemolytic complement, Serpina11 - serine (or cysteine) peptidase inhibitor, clade a (alpha-1 antiproteinase, antitrypsin), member 11, Stfa3 - stefin a3, Spock1 - sparc/osteonectin, cwcv and kazal-like domains proteoglycan 1, Serpina3n - serine (or cysteine…
	GO:0004857	enzyme inhibitor activity	7.02e-06	2.54	366	28	[Vil1 - villin 1, Serpinb11 - serine (or cysteine) peptidase inhibitor, clade b (ovalbumin), member 11, Spock3 - sparc/osteonectin, cwcv and kazal-like domains proteoglycan 3, Serpina3n - serine (or cysteine) peptidase inhibitor, clade a, member 3n, Elfn2 - leucine rich repeat and fibronectin type iii, extracellular 2, Ppp1r26 - protein phosphatase 1, regulatory subunit 26, Daf2 - decay accelerat…
	GO:0048018	receptor ligand activity	4.62e-07	2.51	476	36	[Gdnf - glial cell line derived neurotrophic factor, Ccl24 - chemokine (c-c motif) ligand 24, Vegfa - vascular endothelial growth factor a, Pthlh - parathyroid hormone-like peptide, Wnt10a - wingless related mmtv integration site 10a, Bmp3 - bone morphogenetic protein 3, Gdf10 - growth differentiation factor 10, Sema4g - sema domain, immunoglobulin domain (ig), transmembrane domain (tm) and short…
	GO:0030545	receptor regulator activity	2.92e-07	2.48	508	38	[Gdnf - glial cell line derived neurotrophic factor, Ccl24 - chemokine (c-c motif) ligand 24, Vegfa - vascular endothelial growth factor a, Pthlh - parathyroid hormone-like peptide, Wnt10a - wingless related mmtv integration site 10a, Bmp3 - bone morphogenetic protein 3, Gdf10 - growth differentiation factor 10, Sema4g - sema domain, immunoglobulin domain (ig), transmembrane domain (tm) and short…
	GO:0005509	calcium ion binding	1.04e-07	2.41	591	43	[Vil1 - villin 1, Edil3 - egf-like repeats and discoidin i-like domains 3, Pcdh8 - protocadherin 8, Aif1 - allograft inflammatory factor 1, Ppef2 - protein phosphatase, ef hand calcium-binding domain 2, Cadps - ca2+-dependent secretion activator, Syt8 - synaptotagmin viii, Bcan - brevican, Pcp4 - purkinje cell protein 4, Epdr1 - ependymin related protein 1 (zebrafish), Rhbdl3 - rhomboid, veinlet-…
	GO:0005216	ion channel activity	1.29e-05	2.41	399	29	[Lrrc8e - leucine rich repeat containing 8 family, member e, Hcn1 - hyperpolarization-activated, cyclic nucleotide-gated k+ 1, Ptk2b - ptk2 protein tyrosine kinase 2 beta, Kcnj1 - potassium inwardly-rectifying channel, subfamily j, member 1, Kcna2 - potassium voltage-gated channel, shaker-related subfamily, member 2, P2rx2 - purinergic receptor p2x, ligand-gated ion channel, 2, Best3 - bestrophin…
	GO:0022838	substrate-specific channel activity	2.23e-05	2.34	411	29	[Lrrc8e - leucine rich repeat containing 8 family, member e, Hcn1 - hyperpolarization-activated, cyclic nucleotide-gated k+ 1, Ptk2b - ptk2 protein tyrosine kinase 2 beta, Kcnj1 - potassium inwardly-rectifying channel, subfamily j, member 1, Kcna2 - potassium voltage-gated channel, shaker-related subfamily, member 2, P2rx2 - purinergic receptor p2x, ligand-gated ion channel, 2, Best3 - bestrophin…
	GO:0001664	G-protein coupled receptor binding	0.000416	2.34	284	20	[C3 - complement component 3, Adra2a - adrenergic receptor, alpha 2a, Ccl20 - chemokine (c-c motif) ligand 20, Sfrp1 - secreted frizzled-related protein 1, Ccl24 - chemokine (c-c motif) ligand 24, Ppy - pancreatic polypeptide, Jak1 - janus kinase 1, Ccl12 - chemokine (c-c motif) ligand 12, Gprasp2 - g protein-coupled receptor associated sorting protein 2, Fzd7 - frizzled homolog 7 (drosophila), W…
	GO:0022890	inorganic cation transmembrane transporter activity	7.09e-06	2.23	536	36	[Slc8a2 - solute carrier family 8 (sodium/calcium exchanger), member 2, Trf - transferrin, Slc46a1 - solute carrier family 46, member 1, Hcn1 - hyperpolarization-activated, cyclic nucleotide-gated k+ 1, Ptk2b - ptk2 protein tyrosine kinase 2 beta, Slc2a12 - solute carrier family 2 (facilitated glucose transporter), member 12, Slc4a4 - solute carrier family 4 (anion exchanger), member 4, Kcnj1 - p…
	GO:0022803	passive transmembrane transporter activity	5.51e-05	2.23	432	29	[Lrrc8e - leucine rich repeat containing 8 family, member e, Hcn1 - hyperpolarization-activated, cyclic nucleotide-gated k+ 1, Ptk2b - ptk2 protein tyrosine kinase 2 beta, Kcnj1 - potassium inwardly-rectifying channel, subfamily j, member 1, Kcna2 - potassium voltage-gated channel, shaker-related subfamily, member 2, P2rx2 - purinergic receptor p2x, ligand-gated ion channel, 2, Best3 - bestrophin…
	GO:0015267	channel activity	5.51e-05	2.23	432	29	[Lrrc8e - leucine rich repeat containing 8 family, member e, Hcn1 - hyperpolarization-activated, cyclic nucleotide-gated k+ 1, Ptk2b - ptk2 protein tyrosine kinase 2 beta, Kcnj1 - potassium inwardly-rectifying channel, subfamily j, member 1, Kcna2 - potassium voltage-gated channel, shaker-related subfamily, member 2, P2rx2 - purinergic receptor p2x, ligand-gated ion channel, 2, Best3 - bestrophin…
	GO:0008324	cation transmembrane transporter activity	3.82e-06	2.2	587	39	[Slc8a2 - solute carrier family 8 (sodium/calcium exchanger), member 2, Adc - arginine decarboxylase, Trf - transferrin, Slc46a1 - solute carrier family 46, member 1, Hcn1 - hyperpolarization-activated, cyclic nucleotide-gated k+ 1, Ptk2b - ptk2 protein tyrosine kinase 2 beta, Slc2a12 - solute carrier family 2 (facilitated glucose transporter), member 12, Slc4a4 - solute carrier family 4 (anion e…
	GO:0046873	metal ion transmembrane transporter activity	0.00031	2.11	409	26	[Slc8a2 - solute carrier family 8 (sodium/calcium exchanger), member 2, Trf - transferrin, Hcn1 - hyperpolarization-activated, cyclic nucleotide-gated k+ 1, Slc4a4 - solute carrier family 4 (anion exchanger), member 4, Kcnj1 - potassium inwardly-rectifying channel, subfamily j, member 1, Kcna2 - potassium voltage-gated channel, shaker-related subfamily, member 2, Cacng4 - calcium channel, voltage…
	GO:0005102	signaling receptor binding	2.87e-12	2.05	1635	101	[Camk2a - calcium/calmodulin-dependent protein kinase ii alpha, Gdnf - glial cell line derived neurotrophic factor, Pthlh - parathyroid hormone-like peptide, Nlgn2 - neuroligin 2, Ptk2b - ptk2 protein tyrosine kinase 2 beta, Gdf10 - growth differentiation factor 10, H2-T10 - histocompatibility 2, t region locus 10, Marco - macrophage receptor with collagenous structure, Nrg2 - neuregulin 2, Nrxn1…
	GO:0015318	inorganic molecular entity transmembrane transporter activity	1.57e-05	1.95	764	45	[Slc8a2 - solute carrier family 8 (sodium/calcium exchanger), member 2, Slc46a1 - solute carrier family 46, member 1, Trf - transferrin, Lrrc8e - leucine rich repeat containing 8 family, member e, Hcn1 - hyperpolarization-activated, cyclic nucleotide-gated k+ 1, Ptk2b - ptk2 protein tyrosine kinase 2 beta, Slc2a12 - solute carrier family 2 (facilitated glucose transporter), member 12, Slc4a4 - so…
	GO:0008289	lipid binding	3.11e-05	1.95	714	42	[Vil1 - villin 1, Gpr119 - g-protein coupled receptor 119, Soat2 - sterol o-acyltransferase 2, Snap91 - synaptosomal-associated protein 91, Cadps - ca2+-dependent secretion activator, Lpar1 - lysophosphatidic acid receptor 1, Esrrb - estrogen related receptor, beta, C8g - complement component 8, gamma polypeptide, Hcn1 - hyperpolarization-activated, cyclic nucleotide-gated k+ 1, Vdr - vitamin d r…
	GO:0015075	ion transmembrane transporter activity	3.97e-05	1.87	818	46	[Slc8a2 - solute carrier family 8 (sodium/calcium exchanger), member 2, Adc - arginine decarboxylase, Trf - transferrin, Slc46a1 - solute carrier family 46, member 1, Lrrc8e - leucine rich repeat containing 8 family, member e, Hcn1 - hyperpolarization-activated, cyclic nucleotide-gated k+ 1, Ptk2b - ptk2 protein tyrosine kinase 2 beta, Slc4a4 - solute carrier family 4 (anion exchanger), member 4,…
	GO:0044877	protein-containing complex binding	2.43e-06	1.83	1163	64	[Fn1 - fibronectin 1, Aif1 - allograft inflammatory factor 1, Trf - transferrin, Esrrb - estrogen related receptor, beta, Fgd4 - fyve, rhogef and ph domain containing 4, Ptk2b - ptk2 protein tyrosine kinase 2 beta, Myo1e - myosin ie, Ccdc155 - coiled-coil domain containing 155, Spock3 - sparc/osteonectin, cwcv and kazal-like domains proteoglycan 3, Ache - acetylcholinesterase, Fcho1 - fch domain …
	GO:0042803	protein homodimerization activity	5.04e-05	1.81	900	49	[Camk2a - calcium/calmodulin-dependent protein kinase ii alpha, Ern1 - endoplasmic reticulum (er) to nucleus signalling 1, Ikzf2 - ikaros family zinc finger 2, Gdnf - glial cell line derived neurotrophic factor, Ush1g - usher syndrome 1g, Eno2 - enolase 2, gamma neuronal, Ache - acetylcholinesterase, E2f8 - e2f transcription factor 8, Rag1 - recombination activating gene 1, Glipr2 - gli pathogene…
	GO:0098772	molecular function regulator	2.58e-06	1.66	1675	84	[Fn1 - fibronectin 1, Obscn - obscurin, cytoskeletal calmodulin and titin-interacting rhogef, Gdnf - glial cell line derived neurotrophic factor, Pthlh - parathyroid hormone-like peptide, Wnt10a - wingless related mmtv integration site 10a, Fgd4 - fyve, rhogef and ph domain containing 4, Bmp3 - bone morphogenetic protein 3, Wnt11 - wingless-related mmtv integration site 11, Gdf10 - growth differe…
	GO:0022857	transmembrane transporter activity	0.000623	1.63	976	48	[Slc8a2 - solute carrier family 8 (sodium/calcium exchanger), member 2, Adc - arginine decarboxylase, Trf - transferrin, Slc46a1 - solute carrier family 46, member 1, Lrrc8e - leucine rich repeat containing 8 family, member e, Abca13 - atp-binding cassette, sub-family a (abc1), member 13, Hcn1 - hyperpolarization-activated, cyclic nucleotide-gated k+ 1, Ptk2b - ptk2 protein tyrosine kinase 2 beta…
	GO:0046983	protein dimerization activity	9.53e-05	1.61	1363	66	[Camk2a - calcium/calmodulin-dependent protein kinase ii alpha, Npas3 - neuronal pas domain protein 3, Ern1 - endoplasmic reticulum (er) to nucleus signalling 1, Abtb2 - ankyrin repeat and btb (poz) domain containing 2, Ikzf2 - ikaros family zinc finger 2, Gdnf - glial cell line derived neurotrophic factor, Ush1g - usher syndrome 1g, Eno2 - enolase 2, gamma neuronal, Ache - acetylcholinesterase, …
	GO:0042802	identical protein binding	5.51e-06	1.6	1841	89	[Camk2a - calcium/calmodulin-dependent protein kinase ii alpha, Ern1 - endoplasmic reticulum (er) to nucleus signalling 1, Fn1 - fibronectin 1, Ikzf2 - ikaros family zinc finger 2, Gdnf - glial cell line derived neurotrophic factor, Nlgn2 - neuroligin 2, Ush1g - usher syndrome 1g, Eno2 - enolase 2, gamma neuronal, Entpd2 - ectonucleoside triphosphate diphosphohydrolase 2, Slc4a4 - solute carrier …
	GO:0043169	cation binding	5.83e-05	1.36	3501	143	[Camk2a - calcium/calmodulin-dependent protein kinase ii alpha, Cyp4b1 - cytochrome p450, family 4, subfamily b, polypeptide 1, Gpr119 - g-protein coupled receptor 119, Car8 - carbonic anhydrase 8, Ikzf2 - ikaros family zinc finger 2, Otud7a - otu domain containing 7a, Esrrb - estrogen related receptor, beta, Steap1 - six transmembrane epithelial antigen of the prostate 1, Kcnj1 - potassium inwar…
	GO:0046872	metal ion binding	7.53e-05	1.36	3402	139	[Camk2a - calcium/calmodulin-dependent protein kinase ii alpha, Cyp4b1 - cytochrome p450, family 4, subfamily b, polypeptide 1, Car8 - carbonic anhydrase 8, Ikzf2 - ikaros family zinc finger 2, Otud7a - otu domain containing 7a, Esrrb - estrogen related receptor, beta, Steap1 - six transmembrane epithelial antigen of the prostate 1, Kcnj1 - potassium inwardly-rectifying channel, subfamily j, memb…
	GO:0005515	protein binding	2.4e-12	1.33	8624	346	[Npas3 - neuronal pas domain protein 3, Camk2a - calcium/calmodulin-dependent protein kinase ii alpha, Errfi1 - erbb receptor feedback inhibitor 1, Car8 - carbonic anhydrase 8, Ikzf2 - ikaros family zinc finger 2, Otud7a - otu domain containing 7a, Pthlh - parathyroid hormone-like peptide, Mst1r - macrophage stimulating 1 receptor (c-met-related tyrosine kinase), Ptk2b - ptk2 protein tyrosine kin…
	GO:0043167	ion binding	0.000211	1.25	5328	200	[Camk2a - calcium/calmodulin-dependent protein kinase ii alpha, Cyp4b1 - cytochrome p450, family 4, subfamily b, polypeptide 1, Gpr119 - g-protein coupled receptor 119, Car8 - carbonic anhydrase 8, Ikzf2 - ikaros family zinc finger 2, Otud7a - otu domain containing 7a, Mst1r - macrophage stimulating 1 receptor (c-met-related tyrosine kinase), Ptk2b - ptk2 protein tyrosine kinase 2 beta, Decr1 - 2…
	GO:0005488	binding	5.19e-11	1.2	12672	460	[Gpr119 - g-protein coupled receptor 119, Cyp4b1 - cytochrome p450, family 4, subfamily b, polypeptide 1, Errfi1 - erbb receptor feedback inhibitor 1, Ikzf2 - ikaros family zinc finger 2, Pthlh - parathyroid hormone-like peptide, Ptk2b - ptk2 protein tyrosine kinase 2 beta, H2-T10 - histocompatibility 2, t region locus 10, Steap1 - six transmembrane epithelial antigen of the prostate 1, Marco - m…
	GO:0003674	molecular_function	0.000591	1.03	20025	622	[Ptger4 - prostaglandin e receptor 4 (subtype ep4), Gpr119 - g-protein coupled receptor 119, Errfi1 - erbb receptor feedback inhibitor 1, Cyp4b1 - cytochrome p450, family 4, subfamily b, polypeptide 1, Ikzf2 - ikaros family zinc finger 2, Pthlh - parathyroid hormone-like peptide, Ptk2b - ptk2 protein tyrosine kinase 2 beta, Steap1 - six transmembrane epithelial antigen of the prostate 1, H2-T10 -…

## Sheet: LN-BEC only
	Table S3:Enriched GO terms in LN-BEC 5X-DEG
	Biological Process
	GO Term	Description	P-adj value	Enrichment Score	B (number of GO members)	b (number of 5X-DEG overlap with GO members)	5X-DEG
ECM Components & Cell-Adhesion Molecules (Figure 2)	GO:0016338	calcium-independent cell-cell adhesion via plasma membrane cell-adhesion molecules	8.98e-05	13.9	7	4	[Esam - endothelial cell-specific adhesion molecule, Ceacam1 - carcinoembryonic antigen-related cell adhesion molecule 1, Cldn3 - claudin 3, Cadm1 - cell adhesion molecule 1]
	GO:0050901	leukocyte tethering or rolling	4.14e-06	9.46	18	7	[Chst4 - carbohydrate (chondroitin 6/keratan) sulfotransferase 4, Sele - selectin, endothelial cell, Sell - selectin, lymphocyte, Selp - selectin, platelet, Selplg - selectin, platelet (p-selectin) ligand, Lep - leptin, Gcnt1 - glucosaminyl (n-acetyl) transferase 1, core 2]
	GO:0061756	leukocyte adhesion to vascular endothelial cell	6.32e-06	8.96	19	7	[Chst4 - carbohydrate (chondroitin 6/keratan) sulfotransferase 4, Sele - selectin, endothelial cell, Sell - selectin, lymphocyte, Selp - selectin, platelet, Selplg - selectin, platelet (p-selectin) ligand, Lep - leptin, Gcnt1 - glucosaminyl (n-acetyl) transferase 1, core 2]
	GO:0007159	leukocyte cell-cell adhesion	2.99e-07	6.21	47	12	[Chst4 - carbohydrate (chondroitin 6/keratan) sulfotransferase 4, Ptprc - protein tyrosine phosphatase, receptor type, c, Sele - selectin, endothelial cell, Sell - selectin, lymphocyte, Selp - selectin, platelet, Syk - spleen tyrosine kinase, Selplg - selectin, platelet (p-selectin) ligand, Nt5e - 5' nucleotidase, ecto, Stk10 - serine/threonine kinase 10, Lep - leptin, S100a9 - s100 calcium bindi…
	GO:0010543	regulation of platelet activation	0.000264	5.32	32	7	[Alox12 - arachidonate 12-lipoxygenase, Pdgfb - platelet derived growth factor, b polypeptide, Syk - spleen tyrosine kinase, Selp - selectin, platelet, Ceacam1 - carcinoembryonic antigen-related cell adhesion molecule 1, C1qtnf1 - c1q and tumor necrosis factor related protein 1, Ptprj - protein tyrosine phosphatase, receptor type, j]
	GO:0016339	calcium-dependent cell-cell adhesion via plasma membrane cell adhesion molecules	0.000677	4.6	37	7	[Pcdh18 - protocadherin 18, Sell - selectin, lymphocyte, Selp - selectin, platelet, Pcdh1 - protocadherin 1, Cdh23 - cadherin 23 (otocadherin), Ceacam1 - carcinoembryonic antigen-related cell adhesion molecule 1, Cdh8 - cadherin 8]
	GO:0007156	homophilic cell adhesion via plasma membrane adhesion molecules	2.56e-05	3.66	93	14	[Pcdh18 - protocadherin 18, Cadm3 - cell adhesion molecule 3, Pcdh1 - protocadherin 1, Cdh23 - cadherin 23 (otocadherin), Ret - ret proto-oncogene, Cadm1 - cell adhesion molecule 1, Clstn2 - calsyntenin 2, Esam - endothelial cell-specific adhesion molecule, Plxnb2 - plexin b2, Kirrel3 - kin of irre like 3 (drosophila), Pcdh19 - protocadherin 19, Ceacam1 - carcinoembryonic antigen-related cell adh…
	GO:0098609	cell-cell adhesion	1.72e-13	3.41	335	47	[Col13a1 - collagen, type xiii, alpha 1, Pcdh18 - protocadherin 18, Icam5 - intercellular adhesion molecule 5, telencephalin, Cadm3 - cell adhesion molecule 3, Cd93 - cd93 antigen, Sele - selectin, endothelial cell, Cbln1 - cerebellin 1 precursor protein, Lmo7 - lim domain only 7, Nt5e - 5' nucleotidase, ecto, Cldn3 - claudin 3, Ret - ret proto-oncogene, Cadm1 - cell adhesion molecule 1, Clstn2 -…
	GO:0022409	positive regulation of cell-cell adhesion	1.28e-09	3.41	228	32	[Rasal3 - ras protein activator like 3, Il15 - interleukin 15, Runx3 - runt related transcription factor 3, Ikzf1 - ikaros family zinc finger 1, Cd3e - cd3 antigen, epsilon polypeptide, Elane - elastase, neutrophil expressed, Gcnt2 - glucosaminyl (n-acetyl) transferase 2, i-branching enzyme, Myo10 - myosin x, Hlx - h2.0-like homeobox, Cd83 - cd83 antigen, Cx3cl1 - chemokine (c-x3-c motif) ligand …
	GO:1903039	positive regulation of leukocyte cell-cell adhesion	1.04e-07	3.28	193	26	[Rasal3 - ras protein activator like 3, Il15 - interleukin 15, Runx3 - runt related transcription factor 3, Ikzf1 - ikaros family zinc finger 1, Cd3e - cd3 antigen, epsilon polypeptide, Elane - elastase, neutrophil expressed, Cd83 - cd83 antigen, Hlx - h2.0-like homeobox, Slamf1 - signaling lymphocytic activation molecule family member 1, Nckap1l - nck associated protein 1 like, Il1rl2 - interleu…
	GO:0098742	cell-cell adhesion via plasma-membrane adhesion molecules	3.56e-06	3.24	150	20	[Pcdh18 - protocadherin 18, Cadm3 - cell adhesion molecule 3, Sele - selectin, endothelial cell, Cbln1 - cerebellin 1 precursor protein, Cdh23 - cadherin 23 (otocadherin), Pcdh1 - protocadherin 1, Cldn3 - claudin 3, Ret - ret proto-oncogene, Cadm1 - cell adhesion molecule 1, Clstn2 - calsyntenin 2, Esam - endothelial cell-specific adhesion molecule, Mcam - melanoma cell adhesion molecule, Plxnb2 …
	GO:1903038	negative regulation of leukocyte cell-cell adhesion	4.94e-05	3.14	124	16	[Slfn1 - schlafen 1, Foxp3 - forkhead box p3, Runx3 - runt related transcription factor 3, H2-Aa - histocompatibility 2, class ii antigen a, alpha, Nrarp - notch-regulated ankyrin repeat protein, Tnfsf18 - tumor necrosis factor (ligand) superfamily, member 18, Ass1 - argininosuccinate synthetase 1, Smad7 - smad family member 7, Zc3h12d - zinc finger ccch type containing 12d, Pde5a - phosphodieste…
	GO:1903037	regulation of leukocyte cell-cell adhesion	2.55e-09	3.12	273	35	[Rasal3 - ras protein activator like 3, Il15 - interleukin 15, Runx3 - runt related transcription factor 3, Ikzf1 - ikaros family zinc finger 1, Cd3e - cd3 antigen, epsilon polypeptide, Elane - elastase, neutrophil expressed, Zc3h12d - zinc finger ccch type containing 12d, Hlx - h2.0-like homeobox, Pde5a - phosphodiesterase 5a, cgmp-specific, Cd83 - cd83 antigen, Cxcl12 - chemokine (c-x-c motif) …
	GO:0022407	regulation of cell-cell adhesion	2.26e-10	2.91	368	44	[Rasal3 - ras protein activator like 3, Il15 - interleukin 15, Runx3 - runt related transcription factor 3, Ikzf1 - ikaros family zinc finger 1, B4galnt2 - beta-1,4-n-acetyl-galactosaminyl transferase 2, Cd3e - cd3 antigen, epsilon polypeptide, Elane - elastase, neutrophil expressed, Gcnt2 - glucosaminyl (n-acetyl) transferase 2, i-branching enzyme, Zc3h12d - zinc finger ccch type containing 12d,…
	GO:0007155	cell adhesion	4.37e-18	2.82	734	85	[Spon2 - spondin 2, extracellular matrix protein, Klra8 - killer cell lectin-like receptor, subfamily a, member 8, Pcdh18 - protocadherin 18, Adamts12 - a disintegrin-like and metallopeptidase (reprolysin type) with thrombospondin type 1 motif, 12, Emp2 - epithelial membrane protein 2, Cadm3 - cell adhesion molecule 3, Cd96 - cd96 antigen, Hepacam - hepatocyte cell adhesion molecule, Nt5e - 5' nu…
	GO:0045785	positive regulation of cell adhesion	3.83e-10	2.82	388	45	[Rasal3 - ras protein activator like 3, Apbb1ip - amyloid beta (a4) precursor protein-binding, family b, member 1 interacting protein, Il15 - interleukin 15, Ikzf1 - ikaros family zinc finger 1, Dmp1 - dentin matrix protein 1, Runx3 - runt related transcription factor 3, Emp2 - epithelial membrane protein 2, Vegfc - vascular endothelial growth factor c, Cd3e - cd3 antigen, epsilon polypeptide, Sk…
	GO:0022610	biological adhesion	3.07e-18	2.81	744	86	[Spon2 - spondin 2, extracellular matrix protein, Klra8 - killer cell lectin-like receptor, subfamily a, member 8, Pcdh18 - protocadherin 18, Adamts12 - a disintegrin-like and metallopeptidase (reprolysin type) with thrombospondin type 1 motif, 12, Emp2 - epithelial membrane protein 2, Cadm3 - cell adhesion molecule 3, Cd96 - cd96 antigen, Hepacam - hepatocyte cell adhesion molecule, Nt5e - 5' nu…
	GO:0022408	negative regulation of cell-cell adhesion	3.91e-05	2.76	176	20	[Slfn1 - schlafen 1, Alox12 - arachidonate 12-lipoxygenase, Foxp3 - forkhead box p3, Runx3 - runt related transcription factor 3, H2-Aa - histocompatibility 2, class ii antigen a, alpha, B4galnt2 - beta-1,4-n-acetyl-galactosaminyl transferase 2, Snai2 - snail homolog 2 (drosophila), Nrarp - notch-regulated ankyrin repeat protein, Tnfsf18 - tumor necrosis factor (ligand) superfamily, member 18, As…
	GO:0002253	activation of immune response	2.87e-05	2.48	245	25	[Cd3e - cd3 antigen, epsilon polypeptide, Skap1 - src family associated phosphoprotein 1, Clec2i - c-type lectin domain family 2, member i, Tlr6 - toll-like receptor 6, Cd79a - cd79a antigen (immunoglobulin-associated alpha), Nckap1l - nck associated protein 1 like, Tlr12 - toll-like receptor 12, Blk - b lymphoid kinase, Fcnb - ficolin b, Foxp3 - forkhead box p3, Ptprc - protein tyrosine phosphat…
	GO:0030155	cell-cell junction	2.01e-11	2.46	642	65	[Rasal3 - ras protein activator like 3, Apbb1ip - amyloid beta (a4) precursor protein-binding, family b, member 1 interacting protein, Il15 - interleukin 15, Ikzf1 - ikaros family zinc finger 1, Jag2 - jagged 2, Emp2 - epithelial membrane protein 2, Cd3e - cd3 antigen, epsilon polypeptide, Elane - elastase, neutrophil expressed, Cml1 - camello-like 1, Gcnt2 - glucosaminyl (n-acetyl) transferase 2…
	GO:0007162	negative regulation of cell adhesion	1.88e-05	2.44	269	27	[Runx3 - runt related transcription factor 3, B4galnt2 - beta-1,4-n-acetyl-galactosaminyl transferase 2, Cml1 - camello-like 1, Gcnt2 - glucosaminyl (n-acetyl) transferase 2, i-branching enzyme, Zc3h12d - zinc finger ccch type containing 12d, Plxnb2 - plexin b2, Pde5a - phosphodiesterase 5a, cgmp-specific, Hlx - h2.0-like homeobox, Cxcl12 - chemokine (c-x-c motif) ligand 12, Ceacam1 - carcinoembr…
Cytokine & Cytokine Receptors (Figure 4 & 5)	GO:0002232	leukocyte chemotaxis involved in inflammatory response	0.000268	18.25	4	3	[Ffar2 - free fatty acid receptor 2, Slamf1 - signaling lymphocytic activation molecule family member 1, Slamf8 - slam family member 8]
	GO:0035655	interleukin-18-mediated signaling pathway	0.00065	14.6	5	3	[Il18r1 - interleukin 18 receptor 1, Pdgfb - platelet derived growth factor, b polypeptide, Il18rap - interleukin 18 receptor accessory protein]
	GO:0002551	mast cell chemotaxis	0.00065	14.6	5	3	[Ccl11 - chemokine (c-c motif) ligand 11, Kit - kit oncogene, Chga - chromogranin a]
	GO:0002523	leukocyte migration involved in inflammatory response	1.38e-07	11.45	17	8	[Ffar2 - free fatty acid receptor 2, Cx3cl1 - chemokine (c-x3-c motif) ligand 1, Slamf1 - signaling lymphocytic activation molecule family member 1, Ccr6 - chemokine (c-c motif) receptor 6, Slamf8 - slam family member 8, Elane - elastase, neutrophil expressed, Aoc3 - amine oxidase, copper containing 3, S100a9 - s100 calcium binding protein a9 (calgranulin b)]
	GO:2000508	regulation of dendritic cell chemotaxis	0.000303	10.81	9	4	[Slamf1 - signaling lymphocytic activation molecule family member 1, Ccr6 - chemokine (c-c motif) receptor 6, Slamf8 - slam family member 8, Tnfsf18 - tumor necrosis factor (ligand) superfamily, member 18]
	GO:0002438	acute inflammatory response to antigenic stimulus	0.000488	9.73	10	4	[Il31ra - interleukin 31 receptor a, Cxcr2 - chemokine (c-x-c motif) receptor 2, Elane - elastase, neutrophil expressed, Serpinb9 - serine (or cysteine) peptidase inhibitor, clade b, member 9]
	GO:0002724	regulation of T cell cytokine production	8.35e-05	6.31	27	7	[Foxp3 - forkhead box p3, Il18r1 - interleukin 18 receptor 1, Sash3 - sam and sh3 domain containing 3, Slamf1 - signaling lymphocytic activation molecule family member 1, Il1r1 - interleukin 1 receptor, type i, Rsad2 - radical s-adenosyl methionine domain containing 2, Smad7 - smad family member 7]
	GO:0010758	regulation of macrophage chemotaxis	0.000821	5.21	28	6	[Cx3cl1 - chemokine (c-x3-c motif) ligand 1, Slamf1 - signaling lymphocytic activation molecule family member 1, Slamf8 - slam family member 8, Stap1 - signal transducing adaptor family member 1, Tnfsf18 - tumor necrosis factor (ligand) superfamily, member 18, Ptprj - protein tyrosine phosphatase, receptor type, j]
	GO:0046635	positive regulation of alpha-beta T cell activation	4.55e-07	5.08	67	14	[Rasal3 - ras protein activator like 3, Ikzf1 - ikaros family zinc finger 1, Runx3 - runt related transcription factor 3, Foxp3 - forkhead box p3, Ptprc - protein tyrosine phosphatase, receptor type, c, Cd3e - cd3 antigen, epsilon polypeptide, Hlx - h2.0-like homeobox, Cd83 - cd83 antigen, Cd28 - cd28 antigen, Sash3 - sam and sh3 domain containing 3, Nckap1l - nck associated protein 1 like, Syk -…
	GO:0032653	regulation of interleukin-10 production	2.06e-05	5.07	48	10	[Cd34 - cd34 antigen, Trib2 - tribbles homolog 2 (drosophila), Foxp3 - forkhead box p3, Cd83 - cd83 antigen, Cd84 - cd84 antigen, Cd28 - cd28 antigen, Sash3 - sam and sh3 domain containing 3, Epx - eosinophil peroxidase, Tnfrsf9 - tumor necrosis factor receptor superfamily, member 9, Irf4 - interferon regulatory factor 4]
	GO:0002861	regulation of inflammatory response to antigenic stimulus	0.001	5.03	29	6	[Fcer1a - fc receptor, ige, high affinity i, alpha polypeptide, Gpr17 - g protein-coupled receptor 17, Lta - lymphotoxin a, Nlrp6 - nlr family, pyrin domain containing 6, Cd28 - cd28 antigen, Btk - bruton agammaglobulinemia tyrosine kinase]
	GO:0002275	myeloid cell activation involved in immune response	0.000568	4.73	36	7	[Anxa3 - annexin a3, Dock2 - dedicator of cyto-kinesis 2, Slamf1 - signaling lymphocytic activation molecule family member 1, Syk - spleen tyrosine kinase, Kit - kit oncogene, Chga - chromogranin a, Tyrobp - tyro protein tyrosine kinase binding protein]
	GO:0002440	production of molecular mediator of immune response	0.000677	4.6	37	7	[Gapt - grb2-binding adaptor, transmembrane, Il7r - interleukin 7 receptor, Slamf1 - signaling lymphocytic activation molecule family member 1, Il31ra - interleukin 31 receptor a, Kit - kit oncogene, Il18rap - interleukin 18 receptor accessory protein, Chga - chromogranin a]
	GO:0002443	leukocyte mediated immunity	4.44e-07	4.47	87	16	[Spon2 - spondin 2, extracellular matrix protein, Foxp3 - forkhead box p3, Emp2 - epithelial membrane protein 2, Ctsc - cathepsin c, Il31ra - interleukin 31 receptor a, Kit - kit oncogene, Myo1g - myosin ig, Il18rap - interleukin 18 receptor accessory protein, Elane - elastase, neutrophil expressed, Gzmb - granzyme b, Cd8a - cd8 antigen, alpha chain, Ace - angiotensin i converting enzyme (peptidy…
	GO:0046638	positive regulation of alpha-beta T cell differentiation	0.00015	4.47	49	9	[Foxp3 - forkhead box p3, Runx3 - runt related transcription factor 3, Ikzf1 - ikaros family zinc finger 1, Cd83 - cd83 antigen, Hlx - h2.0-like homeobox, Sash3 - sam and sh3 domain containing 3, Nckap1l - nck associated protein 1 like, Syk - spleen tyrosine kinase, Gli3 - gli-kruppel family member gli3]
	GO:0050900	leukocyte migration	3.78e-11	4.01	188	31	[Cxcl11 - chemokine (c-x-c motif) ligand 11, Elane - elastase, neutrophil expressed, Cxcl5 - chemokine (c-x-c motif) ligand 5, Cx3cl1 - chemokine (c-x3-c motif) ligand 1, Nkx2-3 - nk2 homeobox 3, Nckap1l - nck associated protein 1 like, Slamf1 - signaling lymphocytic activation molecule family member 1, Ccl3 - chemokine (c-c motif) ligand 3, Slamf8 - slam family member 8, Aoc3 - amine oxidase, co…
	GO:0002274	myeloid leukocyte activation	3.07e-06	3.89	100	16	[Anxa3 - annexin a3, Cd48 - cd48 antigen, Dock2 - dedicator of cyto-kinesis 2, Kit - kit oncogene, Il18rap - interleukin 18 receptor accessory protein, Prg3 - proteoglycan 3, Tlr6 - toll-like receptor 6, Tlr7 - toll-like receptor 7, Cxcl5 - chemokine (c-x-c motif) ligand 5, Cx3cl1 - chemokine (c-x3-c motif) ligand 1, Slamf1 - signaling lymphocytic activation molecule family member 1, Syk - spleen…
	GO:0032663	regulation of interleukin-2 production	0.000491	3.84	57	9	[Cd34 - cd34 antigen, Foxp3 - forkhead box p3, Cd83 - cd83 antigen, Cd28 - cd28 antigen, Sash3 - sam and sh3 domain containing 3, Cd3e - cd3 antigen, epsilon polypeptide, Irf4 - interferon regulatory factor 4, Ceacam1 - carcinoembryonic antigen-related cell adhesion molecule 1, Clec2i - c-type lectin domain family 2, member i]
	GO:0002250	adaptive immune response	3.86e-11	3.81	211	33	[Emp2 - epithelial membrane protein 2, Cd3g - cd3 antigen, gamma polypeptide, Ctsc - cathepsin c, Cd3e - cd3 antigen, epsilon polypeptide, Il31ra - interleukin 31 receptor a, Cd3d - cd3 antigen, delta polypeptide, Skap1 - src family associated phosphoprotein 1, Il18rap - interleukin 18 receptor accessory protein, Cd8b1 - cd8 antigen, beta chain 1, Cd8a - cd8 antigen, alpha chain, Cd84 - cd84 anti…
	GO:0002685	regulation of leukocyte migration	3.54e-09	3.73	176	27	[Pdgfd - platelet-derived growth factor, d polypeptide, Gpr18 - g protein-coupled receptor 18, Sele - selectin, endothelial cell, Vegfc - vascular endothelial growth factor c, Ednra - endothelin receptor type a, Il1r1 - interleukin 1 receptor, type i, Elane - elastase, neutrophil expressed, Ecm1 - extracellular matrix protein 1, Cx3cl1 - chemokine (c-x3-c motif) ligand 1, Cxcl12 - chemokine (c-x-…
	GO:0042102	positive regulation of T cell proliferation	1.08e-05	3.72	98	15	[Rasal3 - ras protein activator like 3, Il15 - interleukin 15, Foxp3 - forkhead box p3, Ptprc - protein tyrosine phosphatase, receptor type, c, Cd3e - cd3 antigen, epsilon polypeptide, Lep - leptin, Efnb1 - ephrin b1, Il2ra - interleukin 2 receptor, alpha chain, Cd28 - cd28 antigen, Sash3 - sam and sh3 domain containing 3, Nckap1l - nck associated protein 1 like, Slamf1 - signaling lymphocytic ac…
	GO:0002690	positive regulation of leukocyte chemotaxis	8.75e-05	3.7	79	12	[Cx3cl1 - chemokine (c-x3-c motif) ligand 1, Cxcl12 - chemokine (c-x-c motif) ligand 12, Vegfc - vascular endothelial growth factor c, Ednra - endothelin receptor type a, Slamf1 - signaling lymphocytic activation molecule family member 1, Nckap1l - nck associated protein 1 like, Ccr6 - chemokine (c-c motif) receptor 6, Sell - selectin, lymphocyte, Cxcr2 - chemokine (c-x-c motif) receptor 2, F7 - …
	GO:0046651	lymphocyte proliferation	3.27e-05	3.59	95	14	[Il15 - interleukin 15, Gapt - grb2-binding adaptor, transmembrane, Il7r - interleukin 7 receptor, Ptprc - protein tyrosine phosphatase, receptor type, c, Dock2 - dedicator of cyto-kinesis 2, Ifnk - interferon kappa, Cd180 - cd180 antigen, Tnfsf18 - tumor necrosis factor (ligand) superfamily, member 18, Slamf6 - slam family member 6, Cxcl12 - chemokine (c-x-c motif) ligand 12, Cd79a - cd79a antig…
	GO:0070661	leukocyte proliferation	1.77e-05	3.58	102	15	[Gapt - grb2-binding adaptor, transmembrane, Il15 - interleukin 15, Il7r - interleukin 7 receptor, Npr3 - natriuretic peptide receptor 3, Ptprc - protein tyrosine phosphatase, receptor type, c, Dock2 - dedicator of cyto-kinesis 2, Ifnk - interferon kappa, Cd180 - cd180 antigen, Tnfsf18 - tumor necrosis factor (ligand) superfamily, member 18, Slamf6 - slam family member 6, Cxcl12 - chemokine (c-x-…
	GO:0032943	mononuclear cell proliferation	3.69e-05	3.55	96	14	[Il15 - interleukin 15, Gapt - grb2-binding adaptor, transmembrane, Il7r - interleukin 7 receptor, Ptprc - protein tyrosine phosphatase, receptor type, c, Dock2 - dedicator of cyto-kinesis 2, Ifnk - interferon kappa, Cd180 - cd180 antigen, Tnfsf18 - tumor necrosis factor (ligand) superfamily, member 18, Slamf6 - slam family member 6, Cxcl12 - chemokine (c-x-c motif) ligand 12, Cd79a - cd79a antig…
	GO:0097529	myeloid leukocyte migration	1.53e-05	3.44	113	16	[Ccl11 - chemokine (c-c motif) ligand 11, Epx - eosinophil peroxidase, Pdgfb - platelet derived growth factor, b polypeptide, Kit - kit oncogene, Cxcl11 - chemokine (c-x-c motif) ligand 11, S100a9 - s100 calcium binding protein a9 (calgranulin b), Cxcl5 - chemokine (c-x-c motif) ligand 5, Prtn3 - proteinase 3, Flt1 - fms-like tyrosine kinase 1, Cx3cl1 - chemokine (c-x3-c motif) ligand 1, Ccl3 - c…
	GO:0030595	leukocyte chemotaxis	1.45e-05	3.31	125	17	[Ccl11 - chemokine (c-c motif) ligand 11, Pdgfb - platelet derived growth factor, b polypeptide, Kit - kit oncogene, Cxcl11 - chemokine (c-x-c motif) ligand 11, S100a9 - s100 calcium binding protein a9 (calgranulin b), Cxcl5 - chemokine (c-x-c motif) ligand 5, Ffar2 - free fatty acid receptor 2, Flt1 - fms-like tyrosine kinase 1, Cx3cl1 - chemokine (c-x3-c motif) ligand 1, Ccl3 - chemokine (c-c m…
	GO:0001816	cytokine production	0.000167	3.26	97	13	[Runx3 - runt related transcription factor 3, Foxp3 - forkhead box p3, Cd96 - cd96 antigen, Il31ra - interleukin 31 receptor a, Kit - kit oncogene, Il18rap - interleukin 18 receptor accessory protein, Lep - leptin, Cxcl5 - chemokine (c-x-c motif) ligand 5, Itk - il2 inducible t cell kinase, Gpr56 - g protein-coupled receptor 56, Heg1 - heg homolog 1 (zebrafish), Slamf1 - signaling lymphocytic act…
	GO:0002768	immune response-regulating cell surface receptor signaling pathway	8.86e-06	3.17	146	19	[Fcnb - ficolin b, Foxp3 - forkhead box p3, Ptprc - protein tyrosine phosphatase, receptor type, c, Cd3e - cd3 antigen, epsilon polypeptide, Kit - kit oncogene, Skap1 - src family associated phosphoprotein 1, Myo1g - myosin ig, Clec2i - c-type lectin domain family 2, member i, Itk - il2 inducible t cell kinase, Ffar2 - free fatty acid receptor 2, Btk - bruton agammaglobulinemia tyrosine kinase, C…
	GO:0060326	cell chemotaxis	3.91e-07	3.15	193	25	[Agtr1a - angiotensin ii receptor, type 1a, Cxcl11 - chemokine (c-x-c motif) ligand 11, Cxcl5 - chemokine (c-x-c motif) ligand 5, Cx3cl1 - chemokine (c-x3-c motif) ligand 1, Cxcl12 - chemokine (c-x-c motif) ligand 12, Ccl3 - chemokine (c-c motif) ligand 3, Slamf1 - signaling lymphocytic activation molecule family member 1, Nckap1l - nck associated protein 1 like, Slamf8 - slam family member 8, Cc…
	GO:0045321	leukocyte activation	3.28e-14	3.1	448	57	[Il15 - interleukin 15, Apbb1ip - amyloid beta (a4) precursor protein-binding, family b, member 1 interacting protein, Ikzf1 - ikaros family zinc finger 1, Cd48 - cd48 antigen, Ikzf3 - ikaros family zinc finger 3, Jag2 - jagged 2, Cd3g - cd3 antigen, gamma polypeptide, Cd3e - cd3 antigen, epsilon polypeptide, Cd3d - cd3 antigen, delta polypeptide, Il18rap - interleukin 18 receptor accessory prote…
	GO:0002429	immune response-activating cell surface receptor signaling pathway	3.62e-05	3.09	134	17	[Fcnb - ficolin b, Foxp3 - forkhead box p3, Ptprc - protein tyrosine phosphatase, receptor type, c, Cd3e - cd3 antigen, epsilon polypeptide, Skap1 - src family associated phosphoprotein 1, Myo1g - myosin ig, Clec2i - c-type lectin domain family 2, member i, Itk - il2 inducible t cell kinase, Ffar2 - free fatty acid receptor 2, Btk - bruton agammaglobulinemia tyrosine kinase, Cd28 - cd28 antigen, …
	GO:0030098	lymphocyte differentiation	8.49e-08	3.07	230	29	[Il15 - interleukin 15, Ikzf1 - ikaros family zinc finger 1, Gpr18 - g protein-coupled receptor 18, Jag2 - jagged 2, Cd3g - cd3 antigen, gamma polypeptide, Psmb11 - proteasome (prosome, macropain) subunit, beta type, 11, Cd3e - cd3 antigen, epsilon polypeptide, Cd3d - cd3 antigen, delta polypeptide, Cd8a - cd8 antigen, alpha chain, Nkx2-3 - nk2 homeobox 3, Cd79a - cd79a antigen (immunoglobulin-as…
	GO:0046649	lymphocyte activation	2.7e-10	2.89	370	44	[Il15 - interleukin 15, Apbb1ip - amyloid beta (a4) precursor protein-binding, family b, member 1 interacting protein, Cd48 - cd48 antigen, Ikzf1 - ikaros family zinc finger 1, Gpr18 - g protein-coupled receptor 18, Ikzf3 - ikaros family zinc finger 3, Jag2 - jagged 2, Cd3g - cd3 antigen, gamma polypeptide, Psmb11 - proteasome (prosome, macropain) subunit, beta type, 11, Cd3e - cd3 antigen, epsil…
	GO:0006955	immune response	1.38e-20	2.88	794	94	[Spon2 - spondin 2, extracellular matrix protein, Il15 - interleukin 15, Emp2 - epithelial membrane protein 2, Cd3g - cd3 antigen, gamma polypeptide, Cd3e - cd3 antigen, epsilon polypeptide, Cd3d - cd3 antigen, delta polypeptide, Cxcl11 - chemokine (c-x-c motif) ligand 11, Il18rap - interleukin 18 receptor accessory protein, Elane - elastase, neutrophil expressed, Endou - endonuclease, polyu-spec…
	GO:0002764	immune response-regulating signaling pathway	1.11e-05	2.76	203	23	[Fcnb - ficolin b, Foxp3 - forkhead box p3, Ptprc - protein tyrosine phosphatase, receptor type, c, Cd3e - cd3 antigen, epsilon polypeptide, Skap1 - src family associated phosphoprotein 1, Kit - kit oncogene, Myo1g - myosin ig, Clec2i - c-type lectin domain family 2, member i, Tlr6 - toll-like receptor 6, Tlr7 - toll-like receptor 7, Itk - il2 inducible t cell kinase, Ffar2 - free fatty acid rece…
	GO:0050729	positive regulation of inflammatory response	0.000967	2.73	116	13	[Ednra - endothelin receptor type a, Tnfsf18 - tumor necrosis factor (ligand) superfamily, member 18, S100a9 - s100 calcium binding protein a9 (calgranulin b), Tlr6 - toll-like receptor 6, Fcer1a - fc receptor, ige, high affinity i, alpha polypeptide, Lta - lymphotoxin a, Ffar2 - free fatty acid receptor 2, Pde5a - phosphodiesterase 5a, cgmp-specific, Ace - angiotensin i converting enzyme (peptid…
	GO:0002757	immune response-activating signal transduction	3.54e-05	2.7	189	21	[Fcnb - ficolin b, Foxp3 - forkhead box p3, Ptprc - protein tyrosine phosphatase, receptor type, c, Cd3e - cd3 antigen, epsilon polypeptide, Skap1 - src family associated phosphoprotein 1, Myo1g - myosin ig, Clec2i - c-type lectin domain family 2, member i, Tlr6 - toll-like receptor 6, Tlr7 - toll-like receptor 7, Itk - il2 inducible t cell kinase, Ffar2 - free fatty acid receptor 2, Btk - bruton…
	GO:0002376	immune system process	1.17e-28	2.62	1414	152	[Apbb1ip - amyloid beta (a4) precursor protein-binding, family b, member 1 interacting protein, Ikzf1 - ikaros family zinc finger 1, Ikzf3 - ikaros family zinc finger 3, Elane - elastase, neutrophil expressed, Cd300lg - cd300 antigen like family member g, Nlrp6 - nlr family, pyrin domain containing 6, Rtp4 - receptor transporter protein 4, Ace - angiotensin i converting enzyme (peptidyl-dipeptida…
	GO:0001819	positive regulation of cytokine production	8.82e-09	2.62	399	43	[Sulf1 - sulfatase 1, Spon2 - spondin 2, extracellular matrix protein, Il15 - interleukin 15, Agtr1a - angiotensin ii receptor, type 1a, Il1r1 - interleukin 1 receptor, type i, Cd3e - cd3 antigen, epsilon polypeptide, Abcc8 - atp-binding cassette, sub-family c (cftr/mrp), member 8, Fgr - gardner-rasheed feline sarcoma viral (fgr) oncogene homolog, Elane - elastase, neutrophil expressed, Cadm1 - c…
	GO:0006954	inflammatory response	4.48e-08	2.58	377	40	[Gal - galanin, Ptgs1 - prostaglandin-endoperoxide synthase 1, Sele - selectin, endothelial cell, Agtr1a - angiotensin ii receptor, type 1a, Il31ra - interleukin 31 receptor a, Cxcl11 - chemokine (c-x-c motif) ligand 11, Elane - elastase, neutrophil expressed, Tlr6 - toll-like receptor 6, Hck - hemopoietic cell kinase, Lta - lymphotoxin a, Cxcl5 - chemokine (c-x-c motif) ligand 5, Nlrp6 - nlr fam…
	GO:0006935	chemotaxis	2.18e-06	2.58	283	30	[Agtr1a - angiotensin ii receptor, type 1a, Cxcl11 - chemokine (c-x-c motif) ligand 11, Cxcl5 - chemokine (c-x-c motif) ligand 5, Cx3cl1 - chemokine (c-x3-c motif) ligand 1, Cxcl12 - chemokine (c-x-c motif) ligand 12, Slamf1 - signaling lymphocytic activation molecule family member 1, Ccl3 - chemokine (c-c motif) ligand 3, Nckap1l - nck associated protein 1 like, Slamf8 - slam family member 8, Cc…
	GO:0032103	positive regulation of response to external stimulus	3.56e-06	2.57	275	29	[Pdgfd - platelet-derived growth factor, d polypeptide, Ednra - endothelin receptor type a, Vegfc - vascular endothelial growth factor c, Cd180 - cd180 antigen, Tlr6 - toll-like receptor 6, Fcer1a - fc receptor, ige, high affinity i, alpha polypeptide, Lta - lymphotoxin a, Hspb1 - heat shock protein 1, Pde5a - phosphodiesterase 5a, cgmp-specific, Ace - angiotensin i converting enzyme (peptidyl-di…
	GO:0002821	positive regulation of adaptive immune response	0.000761	2.57	142	15	[Foxp3 - forkhead box p3, Ptprc - protein tyrosine phosphatase, receptor type, c, Il1r1 - interleukin 1 receptor, type i, H2-M2 - histocompatibility 2, m region locus 2, Fcer1a - fc receptor, ige, high affinity i, alpha polypeptide, Lta - lymphotoxin a, Il18r1 - interleukin 18 receptor 1, Hlx - h2.0-like homeobox, Btk - bruton agammaglobulinemia tyrosine kinase, Cd28 - cd28 antigen, Sash3 - sam a…
	GO:0002366	leukocyte activation involved in immune response	0.000761	2.57	142	15	[Apbb1ip - amyloid beta (a4) precursor protein-binding, family b, member 1 interacting protein, Gapt - grb2-binding adaptor, transmembrane, Anxa3 - annexin a3, Dock2 - dedicator of cyto-kinesis 2, Ccr6 - chemokine (c-c motif) receptor 6, Kit - kit oncogene, Ifnk - interferon kappa, Cd180 - cd180 antigen, Tnfsf18 - tumor necrosis factor (ligand) superfamily, member 18, Il18r1 - interleukin 18 rece…
	GO:0051249	regulation of lymphocyte activation	1.71e-08	2.56	408	43	[Rasal3 - ras protein activator like 3, Il15 - interleukin 15, Ikzf1 - ikaros family zinc finger 1, Runx3 - runt related transcription factor 3, Lmo1 - lim domain only 1, Tbc1d10c - tbc1 domain family, member 10c, Gal - galanin, Ikzf3 - ikaros family zinc finger 3, Cd3e - cd3 antigen, epsilon polypeptide, Clec2i - c-type lectin domain family 2, member i, Zc3h12d - zinc finger ccch type containing…
	GO:0042330	taxis	2.52e-06	2.56	285	30	[Agtr1a - angiotensin ii receptor, type 1a, Cxcl11 - chemokine (c-x-c motif) ligand 11, Cxcl5 - chemokine (c-x-c motif) ligand 5, Cx3cl1 - chemokine (c-x3-c motif) ligand 1, Cxcl12 - chemokine (c-x-c motif) ligand 12, Slamf1 - signaling lymphocytic activation molecule family member 1, Ccl3 - chemokine (c-c motif) ligand 3, Nckap1l - nck associated protein 1 like, Slamf8 - slam family member 8, Cc…
	GO:0019221	cytokine-mediated signaling pathway	2.03e-05	2.53	240	25	[Ifnlr1 - interferon lambda receptor 1, Il15 - interleukin 15, Il1r1 - interleukin 1 receptor, type i, Cxcl11 - chemokine (c-x-c motif) ligand 11, Il18rap - interleukin 18 receptor accessory protein, Cxcl5 - chemokine (c-x-c motif) ligand 5, Il22ra2 - interleukin 22 receptor, alpha 2, Cx3cl1 - chemokine (c-x3-c motif) ligand 1, Cxcl12 - chemokine (c-x-c motif) ligand 12, Ccl3 - chemokine (c-c mot…
	GO:0045087	innate immune response	4.26e-08	2.52	406	42	[Spon2 - spondin 2, extracellular matrix protein, Oasl1 - 2'-5' oligoadenylate synthetase-like 1, Defb1 - defensin beta 1, Fgr - gardner-rasheed feline sarcoma viral (fgr) oncogene homolog, Cd180 - cd180 antigen, Rnase6 - ribonuclease, rnase a family, 6, Tlr6 - toll-like receptor 6, Hck - hemopoietic cell kinase, Nlrp6 - nlr family, pyrin domain containing 6, Ptk6 - ptk6 protein tyrosine kinase 6…
	GO:0050727	regulation of inflammatory response	2.37e-06	2.52	299	31	[Gpr17 - g protein-coupled receptor 17, Mgll - monoglyceride lipase, Adamts12 - a disintegrin-like and metallopeptidase (reprolysin type) with thrombospondin type 1 motif, 12, Hamp - hepcidin antimicrobial peptide, Ednra - endothelin receptor type a, Il1r1 - interleukin 1 receptor, type i, Nt5e - 5' nucleotidase, ecto, Tlr6 - toll-like receptor 6, Fcer1a - fc receptor, ige, high affinity i, alpha…
	GO:0030335	positive regulation of cell migration	1.61e-09	2.51	494	51	[Pdgfd - platelet-derived growth factor, d polypeptide, Il1r1 - interleukin 1 receptor, type i, Elane - elastase, neutrophil expressed, Drd1a - dopamine receptor d1a, Gcnt2 - glucosaminyl (n-acetyl) transferase 2, i-branching enzyme, P2ry2 - purinergic receptor p2y, g-protein coupled 2, Mcam - melanoma cell adhesion molecule, Hspb1 - heat shock protein 1, Retn - resistin, Hdac9 - histone deacetyl…
	GO:0032102	negative regulation of response to external stimulus	2.92e-06	2.5	302	31	[Gpr17 - g protein-coupled receptor 17, St6gal1 - beta galactoside alpha 2,6 sialyltransferase 1, Klk8 - kallikrein related-peptidase 8, Hamp - hepcidin antimicrobial peptide, Gpr18 - g protein-coupled receptor 18, Abcc8 - atp-binding cassette, sub-family c (cftr/mrp), member 8, Nt5e - 5' nucleotidase, ecto, Cck - cholecystokinin, Nlrp6 - nlr family, pyrin domain containing 6, Il22ra2 - interleuk…
	GO:0002819	regulation of adaptive immune response	0.000164	2.5	195	20	[Il7r - interleukin 7 receptor, Foxp3 - forkhead box p3, Cd48 - cd48 antigen, Ptprc - protein tyrosine phosphatase, receptor type, c, H2-M2 - histocompatibility 2, m region locus 2, Il1r1 - interleukin 1 receptor, type i, Tnfsf18 - tumor necrosis factor (ligand) superfamily, member 18, Smad7 - smad family member 7, Fcer1a - fc receptor, ige, high affinity i, alpha polypeptide, Lta - lymphotoxin a…
	GO:0002697	regulation of immune effector process	7.91e-07	2.38	389	38	[Spon2 - spondin 2, extracellular matrix protein, Ifnlr1 - interferon lambda receptor 1, Il15 - interleukin 15, Cd96 - cd96 antigen, Il1r1 - interleukin 1 receptor, type i, Fgr - gardner-rasheed feline sarcoma viral (fgr) oncogene homolog, Il18rap - interleukin 18 receptor accessory protein, Cadm1 - cell adhesion molecule 1, Fcer1a - fc receptor, ige, high affinity i, alpha polypeptide, Cxcl5 - c…
	GO:0001817	regulation of cytokine production	1.44e-09	2.31	631	60	[Spon2 - spondin 2, extracellular matrix protein, Sulf1 - sulfatase 1, Il15 - interleukin 15, Cd96 - cd96 antigen, Agtr1a - angiotensin ii receptor, type 1a, Il1r1 - interleukin 1 receptor, type i, Cd3e - cd3 antigen, epsilon polypeptide, Abcc8 - atp-binding cassette, sub-family c (cftr/mrp), member 8, Elane - elastase, neutrophil expressed, Clec2i - c-type lectin domain family 2, member i, Tlr6 …
	GO:0031347	regulation of defense response	2.22e-08	2.3	550	52	[Mgll - monoglyceride lipase, Il15 - interleukin 15, Penk - preproenkephalin, Adamts12 - a disintegrin-like and metallopeptidase (reprolysin type) with thrombospondin type 1 motif, 12, Hamp - hepcidin antimicrobial peptide, Cd96 - cd96 antigen, Il1r1 - interleukin 1 receptor, type i, Nt5e - 5' nucleotidase, ecto, Il18rap - interleukin 18 receptor accessory protein, Tlr6 - toll-like receptor 6, Fc…
	GO:0002699	positive regulation of immune effector process	0.000184	2.3	243	23	[Spon2 - spondin 2, extracellular matrix protein, Foxp3 - forkhead box p3, Sh2d1a - sh2 domain protein 1a, Ptprc - protein tyrosine phosphatase, receptor type, c, H2-M2 - histocompatibility 2, m region locus 2, Il1r1 - interleukin 1 receptor, type i, Il18rap - interleukin 18 receptor accessory protein, Fgr - gardner-rasheed feline sarcoma viral (fgr) oncogene homolog, Cadm1 - cell adhesion molecu…
	GO:0002252	immune effector process	1.41e-06	2.29	414	39	[Spon2 - spondin 2, extracellular matrix protein, Anxa3 - annexin a3, Apbb1ip - amyloid beta (a4) precursor protein-binding, family b, member 1 interacting protein, Ifnlr1 - interferon lambda receptor 1, Oasl1 - 2'-5' oligoadenylate synthetase-like 1, Emp2 - epithelial membrane protein 2, Ctsc - cathepsin c, Il31ra - interleukin 31 receptor a, Il18rap - interleukin 18 receptor accessory protein, …
	GO:0043368	positive T cell selection	1.38e-07	11.45	17	8	[Ptprc - protein tyrosine phosphatase, receptor type, c, Bcl11b - b cell leukemia/lymphoma 11b, Cd3g - cd3 antigen, gamma polypeptide, Dock2 - dedicator of cyto-kinesis 2, Cd3e - cd3 antigen, epsilon polypeptide, Cd3d - cd3 antigen, delta polypeptide, Themis - thymocyte selection associated, H2-DMa - histocompatibility 2, class ii, locus dma]
	GO:0043383	negative T cell selection	1.72e-05	9.73	15	6	[Ptprc - protein tyrosine phosphatase, receptor type, c, Cd28 - cd28 antigen, Cd3e - cd3 antigen, epsilon polypeptide, Dock2 - dedicator of cyto-kinesis 2, Themis - thymocyte selection associated, Gli3 - gli-kruppel family member gli3]
	GO:0045058	T cell selection	3.64e-10	9.3	34	13	[Il15 - interleukin 15, Ptprc - protein tyrosine phosphatase, receptor type, c, Bcl11b - b cell leukemia/lymphoma 11b, Jag2 - jagged 2, Cd3g - cd3 antigen, gamma polypeptide, Cd3e - cd3 antigen, epsilon polypeptide, Dock2 - dedicator of cyto-kinesis 2, Cd3d - cd3 antigen, delta polypeptide, Cd28 - cd28 antigen, Syk - spleen tyrosine kinase, Themis - thymocyte selection associated, Gli3 - gli-krup…
	GO:0042119	neutrophil activation	6.32e-06	8.96	19	7	[Cxcl5 - chemokine (c-x-c motif) ligand 5, Anxa3 - annexin a3, Syk - spleen tyrosine kinase, Cxcr2 - chemokine (c-x-c motif) receptor 2, Il18rap - interleukin 18 receptor accessory protein, Prg3 - proteoglycan 3, Tyrobp - tyro protein tyrosine kinase binding protein]
	GO:0045061	thymic T cell selection	3.63e-07	8.76	25	9	[Ptprc - protein tyrosine phosphatase, receptor type, c, Cd28 - cd28 antigen, Jag2 - jagged 2, Cd3g - cd3 antigen, gamma polypeptide, Dock2 - dedicator of cyto-kinesis 2, Cd3e - cd3 antigen, epsilon polypeptide, Cd3d - cd3 antigen, delta polypeptide, Gli3 - gli-kruppel family member gli3, H2-DMa - histocompatibility 2, class ii, locus dma]
	GO:0045060	negative thymic T cell selection	0.00017	8.69	14	5	[Ptprc - protein tyrosine phosphatase, receptor type, c, Cd28 - cd28 antigen, Cd3e - cd3 antigen, epsilon polypeptide, Dock2 - dedicator of cyto-kinesis 2, Gli3 - gli-kruppel family member gli3]
	GO:0036230	granulocyte activation	2.66e-05	7.4	23	7	[Cxcl5 - chemokine (c-x-c motif) ligand 5, Anxa3 - annexin a3, Syk - spleen tyrosine kinase, Cxcr2 - chemokine (c-x-c motif) receptor 2, Il18rap - interleukin 18 receptor accessory protein, Prg3 - proteoglycan 3, Tyrobp - tyro protein tyrosine kinase binding protein]
	GO:0046631	alpha-beta T cell activation	9.76e-05	4.27	57	10	[Il15 - interleukin 15, Itk - il2 inducible t cell kinase, Foxp3 - forkhead box p3, Il18r1 - interleukin 18 receptor 1, Bcl11b - b cell leukemia/lymphoma 11b, Gpr18 - g protein-coupled receptor 18, Nkx2-3 - nk2 homeobox 3, Psmb11 - proteasome (prosome, macropain) subunit, beta type, 11, Dock2 - dedicator of cyto-kinesis 2, Rsad2 - radical s-adenosyl methionine domain containing 2]
	GO:0030217	T cell differentiation	4.42e-08	4.05	126	21	[Il7r - interleukin 7 receptor, Foxp3 - forkhead box p3, Ikzf1 - ikaros family zinc finger 1, Bcl11b - b cell leukemia/lymphoma 11b, Gpr18 - g protein-coupled receptor 18, Ptprc - protein tyrosine phosphatase, receptor type, c, Jag2 - jagged 2, Psmb11 - proteasome (prosome, macropain) subunit, beta type, 11, Cd3g - cd3 antigen, gamma polypeptide, Cd3e - cd3 antigen, epsilon polypeptide, Ccr6 - ch…
	GO:0002704	negative regulation of leukocyte mediated immunity	0.000324	4.05	54	9	[Il7r - interleukin 7 receptor, Foxp3 - forkhead box p3, Ptprc - protein tyrosine phosphatase, receptor type, c, Cd84 - cd84 antigen, Cd96 - cd96 antigen, Slamf1 - signaling lymphocytic activation molecule family member 1, Ceacam1 - carcinoembryonic antigen-related cell adhesion molecule 1, Smad7 - smad family member 7, Serpinb9 - serine (or cysteine) peptidase inhibitor, clade b, member 9]
	GO:0002687	positive regulation of leukocyte migration	6.74e-08	3.96	129	21	[Pdgfd - platelet-derived growth factor, d polypeptide, Sele - selectin, endothelial cell, Ednra - endothelin receptor type a, Vegfc - vascular endothelial growth factor c, Tacr1 - tachykinin receptor 1, Il1r1 - interleukin 1 receptor, type i, Ccr6 - chemokine (c-c motif) receptor 6, Elane - elastase, neutrophil expressed, Tnfsf18 - tumor necrosis factor (ligand) superfamily, member 18, Ptprj - p…
	GO:0045582	positive regulation of T cell differentiation	5.6e-06	3.92	93	15	[Il7r - interleukin 7 receptor, Ikzf1 - ikaros family zinc finger 1, Runx3 - runt related transcription factor 3, Foxp3 - forkhead box p3, H2-Aa - histocompatibility 2, class ii antigen a, alpha, Ptprc - protein tyrosine phosphatase, receptor type, c, Hlx - h2.0-like homeobox, Cd83 - cd83 antigen, Il2ra - interleukin 2 receptor, alpha chain, Sash3 - sam and sh3 domain containing 3, Nckap1l - nck …
	GO:0045621	positive regulation of lymphocyte differentiation	1.47e-06	3.9	106	17	[Il15 - interleukin 15, Il7r - interleukin 7 receptor, Foxp3 - forkhead box p3, Ikzf1 - ikaros family zinc finger 1, Runx3 - runt related transcription factor 3, H2-Aa - histocompatibility 2, class ii antigen a, alpha, Ptprc - protein tyrosine phosphatase, receptor type, c, Prdm1 - pr domain containing 1, with znf domain, Cd83 - cd83 antigen, Hlx - h2.0-like homeobox, Il2ra - interleukin 2 recept…
	GO:0042035	regulation of cytokine biosynthetic process	9.53e-06	3.76	97	15	[Foxp3 - forkhead box p3, Cd3e - cd3 antigen, epsilon polypeptide, Cybb - cytochrome b-245, beta polypeptide, Elane - elastase, neutrophil expressed, Prg3 - proteoglycan 3, Clec2i - c-type lectin domain family 2, member i, Tlr6 - toll-like receptor 6, Fcer1a - fc receptor, ige, high affinity i, alpha polypeptide, Tlr7 - toll-like receptor 7, Hspb1 - heat shock protein 1, Trib2 - tribbles homolog …
	GO:0002460	adaptive immune response based on somatic recombination of immune receptors built from immunoglobulin superfamily domains	7.7e-05	3.74	78	12	[Gzmb - granzyme b, Foxp3 - forkhead box p3, Cd8a - cd8 antigen, alpha chain, Il18bp - interleukin 18 binding protein, Emp2 - epithelial membrane protein 2, Ctsc - cathepsin c, Slamf1 - signaling lymphocytic activation molecule family member 1, Il31ra - interleukin 31 receptor a, Myo1g - myosin ig, Il18rap - interleukin 18 receptor accessory protein, H2-DMa - histocompatibility 2, class ii, locus…
	GO:0002688	regulation of leukocyte chemotaxis	1.77e-05	3.58	102	15	[Gpr18 - g protein-coupled receptor 18, Vegfc - vascular endothelial growth factor c, Ednra - endothelin receptor type a, Ccr6 - chemokine (c-c motif) receptor 6, Stap1 - signal transducing adaptor family member 1, Tnfsf18 - tumor necrosis factor (ligand) superfamily, member 18, Ptprj - protein tyrosine phosphatase, receptor type, j, Cx3cl1 - chemokine (c-x3-c motif) ligand 1, Cxcl12 - chemokine …
	GO:0045580	regulation of T cell differentiation	4.58e-07	3.55	144	21	[Il15 - interleukin 15, Il7r - interleukin 7 receptor, Foxp3 - forkhead box p3, Ikzf1 - ikaros family zinc finger 1, Runx3 - runt related transcription factor 3, H2-Aa - histocompatibility 2, class ii antigen a, alpha, Ptprc - protein tyrosine phosphatase, receptor type, c, Prdm1 - pr domain containing 1, with znf domain, Nrarp - notch-regulated ankyrin repeat protein, Tnfsf18 - tumor necrosis fa…
	GO:0002718	regulation of cytokine production involved in immune response	0.000493	3.53	69	10	[Spon2 - spondin 2, extracellular matrix protein, Foxp3 - forkhead box p3, Ffar2 - free fatty acid receptor 2, Il18r1 - interleukin 18 receptor 1, Sash3 - sam and sh3 domain containing 3, Cd96 - cd96 antigen, Slamf1 - signaling lymphocytic activation molecule family member 1, Il1r1 - interleukin 1 receptor, type i, Rsad2 - radical s-adenosyl methionine domain containing 2, Smad7 - smad family mem…
	GO:0050672	negative regulation of lymphocyte proliferation	0.000142	3.52	83	12	[Slfn1 - schlafen 1, Zc3h12d - zinc finger ccch type containing 12d, Foxp3 - forkhead box p3, Pde5a - phosphodiesterase 5a, cgmp-specific, H2-Aa - histocompatibility 2, class ii antigen a, alpha, Gal - galanin, Il2ra - interleukin 2 receptor, alpha chain, Btk - bruton agammaglobulinemia tyrosine kinase, Prdm1 - pr domain containing 1, with znf domain, Ceacam1 - carcinoembryonic antigen-related ce…
	GO:0032945	negative regulation of mononuclear cell proliferation	0.000142	3.52	83	12	[Slfn1 - schlafen 1, Zc3h12d - zinc finger ccch type containing 12d, Foxp3 - forkhead box p3, Pde5a - phosphodiesterase 5a, cgmp-specific, H2-Aa - histocompatibility 2, class ii antigen a, alpha, Gal - galanin, Btk - bruton agammaglobulinemia tyrosine kinase, Il2ra - interleukin 2 receptor, alpha chain, Prdm1 - pr domain containing 1, with znf domain, Ceacam1 - carcinoembryonic antigen-related ce…
	GO:0051250	negative regulation of lymphocyte activation	6.5e-07	3.48	147	21	[Slfn1 - schlafen 1, Foxp3 - forkhead box p3, Runx3 - runt related transcription factor 3, H2-Aa - histocompatibility 2, class ii antigen a, alpha, Gal - galanin, Tbc1d10c - tbc1 domain family, member 10c, Prdm1 - pr domain containing 1, with znf domain, Nrarp - notch-regulated ankyrin repeat protein, Pglyrp1 - peptidoglycan recognition protein 1, Sox11 - sry-box containing gene 11, Tnfsf18 - tum…
	GO:0070664	negative regulation of leukocyte proliferation	0.000224	3.36	87	12	[Slfn1 - schlafen 1, Zc3h12d - zinc finger ccch type containing 12d, Foxp3 - forkhead box p3, Pde5a - phosphodiesterase 5a, cgmp-specific, H2-Aa - histocompatibility 2, class ii antigen a, alpha, Gal - galanin, Il2ra - interleukin 2 receptor, alpha chain, Btk - bruton agammaglobulinemia tyrosine kinase, Prdm1 - pr domain containing 1, with znf domain, Ceacam1 - carcinoembryonic antigen-related ce…
	GO:0042129	regulation of T cell proliferation	4.2e-07	3.33	168	23	[Rasal3 - ras protein activator like 3, Slfn1 - schlafen 1, Il15 - interleukin 15, Foxp3 - forkhead box p3, Lmo1 - lim domain only 1, H2-Aa - histocompatibility 2, class ii antigen a, alpha, Ptprc - protein tyrosine phosphatase, receptor type, c, Cd3e - cd3 antigen, epsilon polypeptide, Tnfsf18 - tumor necrosis factor (ligand) superfamily, member 18, Lep - leptin, Clec2i - c-type lectin domain fa…
	GO:0050870	positive regulation of T cell activation	1.39e-07	3.32	183	25	[Rasal3 - ras protein activator like 3, Il15 - interleukin 15, Runx3 - runt related transcription factor 3, Ikzf1 - ikaros family zinc finger 1, Cd3e - cd3 antigen, epsilon polypeptide, Hlx - h2.0-like homeobox, Cd83 - cd83 antigen, Nckap1l - nck associated protein 1 like, Slamf1 - signaling lymphocytic activation molecule family member 1, Il1rl2 - interleukin 1 receptor-like 2, Ceacam1 - carcino…
	GO:0042110	T cell activation	5.62e-09	3.29	229	31	[Il15 - interleukin 15, Apbb1ip - amyloid beta (a4) precursor protein-binding, family b, member 1 interacting protein, Cd48 - cd48 antigen, Ikzf1 - ikaros family zinc finger 1, Gpr18 - g protein-coupled receptor 18, Jag2 - jagged 2, Cd3g - cd3 antigen, gamma polypeptide, Psmb11 - proteasome (prosome, macropain) subunit, beta type, 11, Cd3e - cd3 antigen, epsilon polypeptide, Cd3d - cd3 antigen, d…
	GO:0032944	regulation of mononuclear cell proliferation	1.03e-08	3.29	222	30	[Rasal3 - ras protein activator like 3, Il15 - interleukin 15, St6gal1 - beta galactoside alpha 2,6 sialyltransferase 1, Lmo1 - lim domain only 1, Ikzf3 - ikaros family zinc finger 3, Gal - galanin, Cd3e - cd3 antigen, epsilon polypeptide, Clec2i - c-type lectin domain family 2, member i, Zc3h12d - zinc finger ccch type containing 12d, Pde5a - phosphodiesterase 5a, cgmp-specific, Slamf1 - signali…
	GO:0050670	regulation of lymphocyte proliferation	3.17e-08	3.21	220	29	[Rasal3 - ras protein activator like 3, Il15 - interleukin 15, Lmo1 - lim domain only 1, Ikzf3 - ikaros family zinc finger 3, Gal - galanin, Cd3e - cd3 antigen, epsilon polypeptide, Clec2i - c-type lectin domain family 2, member i, Zc3h12d - zinc finger ccch type containing 12d, Pde5a - phosphodiesterase 5a, cgmp-specific, Slamf1 - signaling lymphocytic activation molecule family member 1, Nckap1…
	GO:0050921	positive regulation of chemotaxis	2.2e-05	3.21	129	17	[Pdgfd - platelet-derived growth factor, d polypeptide, Vegfc - vascular endothelial growth factor c, Ednra - endothelin receptor type a, Ccr6 - chemokine (c-c motif) receptor 6, Pdgfb - platelet derived growth factor, b polypeptide, Snai2 - snail homolog 2 (drosophila), Tnfsf18 - tumor necrosis factor (ligand) superfamily, member 18, Pdgfrb - platelet derived growth factor receptor, beta polypep…
	GO:0050866	negative regulation of cell activation	3.2e-07	3.18	191	25	[Runx3 - runt related transcription factor 3, Tbc1d10c - tbc1 domain family, member 10c, Gal - galanin, Zc3h12d - zinc finger ccch type containing 12d, Hlx - h2.0-like homeobox, Pde5a - phosphodiesterase 5a, cgmp-specific, Cd84 - cd84 antigen, Bank1 - b cell scaffold protein with ankyrin repeats 1, Ceacam1 - carcinoembryonic antigen-related cell adhesion molecule 1, Gli3 - gli-kruppel family memb…
	GO:0070663	regulation of leukocyte proliferation	2.59e-08	3.16	231	30	[Rasal3 - ras protein activator like 3, Il15 - interleukin 15, St6gal1 - beta galactoside alpha 2,6 sialyltransferase 1, Lmo1 - lim domain only 1, Ikzf3 - ikaros family zinc finger 3, Gal - galanin, Cd3e - cd3 antigen, epsilon polypeptide, Clec2i - c-type lectin domain family 2, member i, Zc3h12d - zinc finger ccch type containing 12d, Pde5a - phosphodiesterase 5a, cgmp-specific, Slamf1 - signali…
	GO:1902107	positive regulation of leukocyte differentiation	3.23e-06	3.15	162	21	[Il15 - interleukin 15, Il7r - interleukin 7 receptor, Foxp3 - forkhead box p3, Ikzf1 - ikaros family zinc finger 1, Runx3 - runt related transcription factor 3, H2-Aa - histocompatibility 2, class ii antigen a, alpha, Ptprc - protein tyrosine phosphatase, receptor type, c, Prdm1 - pr domain containing 1, with znf domain, Tesc - tescalcin, Cd83 - cd83 antigen, Hlx - h2.0-like homeobox, Il2ra - in…
	GO:0002695	negative regulation of leukocyte activation	2.16e-06	3.13	171	22	[Slfn1 - schlafen 1, Foxp3 - forkhead box p3, Runx3 - runt related transcription factor 3, H2-Aa - histocompatibility 2, class ii antigen a, alpha, Gal - galanin, Tbc1d10c - tbc1 domain family, member 10c, Prdm1 - pr domain containing 1, with znf domain, Nrarp - notch-regulated ankyrin repeat protein, Pglyrp1 - peptidoglycan recognition protein 1, Sox11 - sry-box containing gene 11, Tnfsf18 - tum…
	GO:0001936	regulation of endothelial cell proliferation	5.45e-05	3.11	125	16	[Sulf1 - sulfatase 1, Fgfr3 - fibroblast growth factor receptor 3, Ccl11 - chemokine (c-c motif) ligand 11, Atoh8 - atonal homolog 8 (drosophila), Vegfc - vascular endothelial growth factor c, Agtr1a - angiotensin ii receptor, type 1a, Pdgfb - platelet derived growth factor, b polypeptide, Nrarp - notch-regulated ankyrin repeat protein, Lep - leptin, Apln - apelin, Nr4a1 - nuclear receptor subfam…
	GO:0002706	regulation of lymphocyte mediated immunity	2.54e-06	3.01	186	23	[Il7r - interleukin 7 receptor, Foxp3 - forkhead box p3, Sh2d1a - sh2 domain protein 1a, Ptprc - protein tyrosine phosphatase, receptor type, c, Cd96 - cd96 antigen, H2-M2 - histocompatibility 2, m region locus 2, Il1r1 - interleukin 1 receptor, type i, Il18rap - interleukin 18 receptor accessory protein, Cadm1 - cell adhesion molecule 1, Lep - leptin, Smad7 - smad family member 7, Fcer1a - fc re…
	GO:0032946	positive regulation of mononuclear cell proliferation	5.28e-05	3	138	17	[Rasal3 - ras protein activator like 3, Il15 - interleukin 15, St6gal1 - beta galactoside alpha 2,6 sialyltransferase 1, Foxp3 - forkhead box p3, Ptprc - protein tyrosine phosphatase, receptor type, c, Tacr1 - tachykinin receptor 1, Cd3e - cd3 antigen, epsilon polypeptide, Lep - leptin, Efnb1 - ephrin b1, Il2ra - interleukin 2 receptor, alpha chain, Cd28 - cd28 antigen, Sash3 - sam and sh3 domain…
	GO:0001910	regulation of leukocyte mediated cytotoxicity	0.000407	2.98	106	13	[Il7r - interleukin 7 receptor, Ptprc - protein tyrosine phosphatase, receptor type, c, Sh2d1a - sh2 domain protein 1a, H2-M2 - histocompatibility 2, m region locus 2, Il18rap - interleukin 18 receptor accessory protein, Stap1 - signal transducing adaptor family member 1, Cadm1 - cell adhesion molecule 1, Lep - leptin, Cxcl5 - chemokine (c-x-c motif) ligand 5, Slamf6 - slam family member 6, Ceaca…
	GO:0050868	negative regulation of T cell activation	0.000293	2.94	116	14	[Slfn1 - schlafen 1, Runx3 - runt related transcription factor 3, Foxp3 - forkhead box p3, H2-Aa - histocompatibility 2, class ii antigen a, alpha, Nrarp - notch-regulated ankyrin repeat protein, Tnfsf18 - tumor necrosis factor (ligand) superfamily, member 18, Smad7 - smad family member 7, Zc3h12d - zinc finger ccch type containing 12d, Pde5a - phosphodiesterase 5a, cgmp-specific, Hlx - h2.0-like…
	GO:0050867	positive regulation of cell activation	4.28e-09	2.9	319	38	[Rasal3 - ras protein activator like 3, Il15 - interleukin 15, Runx3 - runt related transcription factor 3, Ikzf1 - ikaros family zinc finger 1, Hamp - hepcidin antimicrobial peptide, Cd3e - cd3 antigen, epsilon polypeptide, Fgr - gardner-rasheed feline sarcoma viral (fgr) oncogene homolog, Clec2i - c-type lectin domain family 2, member i, Tlr6 - toll-like receptor 6, Fcer1a - fc receptor, ige, h…
	GO:0050863	regulation of T cell activation	1.77e-08	2.9	294	35	[Rasal3 - ras protein activator like 3, Il15 - interleukin 15, Runx3 - runt related transcription factor 3, Ikzf1 - ikaros family zinc finger 1, Lmo1 - lim domain only 1, Cd3e - cd3 antigen, epsilon polypeptide, Clec2i - c-type lectin domain family 2, member i, Zc3h12d - zinc finger ccch type containing 12d, Hlx - h2.0-like homeobox, Pde5a - phosphodiesterase 5a, cgmp-specific, Cd83 - cd83 antige…
	GO:0070665	positive regulation of leukocyte proliferation	9.05e-05	2.87	144	17	[Rasal3 - ras protein activator like 3, Il15 - interleukin 15, St6gal1 - beta galactoside alpha 2,6 sialyltransferase 1, Foxp3 - forkhead box p3, Ptprc - protein tyrosine phosphatase, receptor type, c, Tacr1 - tachykinin receptor 1, Cd3e - cd3 antigen, epsilon polypeptide, Lep - leptin, Efnb1 - ephrin b1, Il2ra - interleukin 2 receptor, alpha chain, Cd28 - cd28 antigen, Sash3 - sam and sh3 domain…
	GO:0050671	positive regulation of lymphocyte proliferation	0.00015	2.86	136	16	[Rasal3 - ras protein activator like 3, Il15 - interleukin 15, Foxp3 - forkhead box p3, Ptprc - protein tyrosine phosphatase, receptor type, c, Tacr1 - tachykinin receptor 1, Cd3e - cd3 antigen, epsilon polypeptide, Lep - leptin, Efnb1 - ephrin b1, Il2ra - interleukin 2 receptor, alpha chain, Cd28 - cd28 antigen, Sash3 - sam and sh3 domain containing 3, Nckap1l - nck associated protein 1 like, Sl…
	GO:0002521	leukocyte differentiation	2.26e-07	2.66	311	34	[Il15 - interleukin 15, Ikzf1 - ikaros family zinc finger 1, Gpr18 - g protein-coupled receptor 18, Jag2 - jagged 2, Cd3g - cd3 antigen, gamma polypeptide, Psmb11 - proteasome (prosome, macropain) subunit, beta type, 11, Cd3e - cd3 antigen, epsilon polypeptide, Cd3d - cd3 antigen, delta polypeptide, Cd8a - cd8 antigen, alpha chain, Nkx2-3 - nk2 homeobox 3, Cd79a - cd79a antigen (immunoglobulin-as…
Other GO Terms	GO:0060316	positive regulation of ryanodine-sensitive calcium-release channel activity	0.000268	18.25	4	3	[Gstm7 - glutathione s-transferase, mu 7, Jph2 - junctophilin 2, Akap6 - a kinase (prka) anchor protein 6]
	GO:2000491	positive regulation of hepatic stellate cell activation	3.98e-05	16.22	6	4	[Acta2 - actin, alpha 2, smooth muscle, aorta, Pdgfb - platelet derived growth factor, b polypeptide, Lep - leptin, Pdgfrb - platelet derived growth factor receptor, beta polypeptide]
	GO:0035701	hematopoietic stem cell migration	0.00065	14.6	5	3	[Bcl11b - b cell leukemia/lymphoma 11b, Cxcr4 - chemokine (c-x-c motif) receptor 4, Kit - kit oncogene]
	GO:0046618	drug export	0.00065	14.6	5	3	[Nr1i2 - nuclear receptor subfamily 1, group i, member 2, Abcb1a - atp-binding cassette, sub-family b (mdr/tap), member 1a, Abcg2 - atp-binding cassette, sub-family g (white), member 2]
	GO:0046069	cGMP catabolic process	0.00065	14.6	5	3	[Pde5a - phosphodiesterase 5a, cgmp-specific, Pde9a - phosphodiesterase 9a, Pde1a - phosphodiesterase 1a, calmodulin-dependent]
	GO:0009214	cyclic nucleotide catabolic process	0.000174	12.16	8	4	[Pde4a - phosphodiesterase 4a, camp specific, Pde5a - phosphodiesterase 5a, cgmp-specific, Pde9a - phosphodiesterase 9a, Pde1a - phosphodiesterase 1a, calmodulin-dependent]
	GO:0030431	sleep	0.000303	10.81	9	4	[Htr2a - 5-hydroxytryptamine (serotonin) receptor 2a, Cacna1i - calcium channel, voltage-dependent, alpha 1i subunit, Grin2a - glutamate receptor, ionotropic, nmda2a (epsilon 1), Ptgdr - prostaglandin d receptor]
	GO:2000489	regulation of hepatic stellate cell activation	0.000303	10.81	9	4	[Acta2 - actin, alpha 2, smooth muscle, aorta, Pdgfb - platelet derived growth factor, b polypeptide, Lep - leptin, Pdgfrb - platelet derived growth factor receptor, beta polypeptide]
	GO:0045059	positive thymic T cell selection	1.07e-05	10.43	14	6	[Ptprc - protein tyrosine phosphatase, receptor type, c, Cd3g - cd3 antigen, gamma polypeptide, Dock2 - dedicator of cyto-kinesis 2, Cd3e - cd3 antigen, epsilon polypeptide, Cd3d - cd3 antigen, delta polypeptide, H2-DMa - histocompatibility 2, class ii, locus dma]
	GO:0019370	leukotriene biosynthetic process	7.22e-05	10.14	12	5	[Fcer1a - fc receptor, ige, high affinity i, alpha polypeptide, Mgst2 - microsomal glutathione s-transferase 2, Ggt5 - gamma-glutamyltransferase 5, Syk - spleen tyrosine kinase, Prg3 - proteoglycan 3]
	GO:0035025	positive regulation of Rho protein signal transduction	9.42e-10	9.73	30	12	[Gpr17 - g protein-coupled receptor 17, Gpr56 - g protein-coupled receptor 56, Gpr18 - g protein-coupled receptor 18, Gpr65 - g-protein coupled receptor 65, F2rl2 - coagulation factor ii (thrombin) receptor-like 2, Lpar6 - lysophosphatidic acid receptor 6, Lpar4 - lysophosphatidic acid receptor 4, F2rl3 - coagulation factor ii (thrombin) receptor-like 3, Gpr20 - g protein-coupled receptor 20, Gpr…
	GO:2001212	regulation of vasculogenesis	0.000113	9.36	13	5	[Cd34 - cd34 antigen, Asb4 - ankyrin repeat and socs box-containing 4, Emp2 - epithelial membrane protein 2, Ceacam1 - carcinoembryonic antigen-related cell adhesion molecule 1, Hey2 - hairy/enhancer-of-split related with yrpw motif 2]
	GO:1901018	positive regulation of potassium ion transmembrane transporter activity	4.57e-06	7.79	25	8	[Lrrc55 - leucine rich repeat containing 55, Atp1b2 - atpase, na+/k+ transporting, beta 2 polypeptide, Gal - galanin, Atp1b1 - atpase, na+/k+ transporting, beta 1 polypeptide, Kcnc2 - potassium voltage gated channel, shaw-related subfamily, member 2, Abcc8 - atp-binding cassette, sub-family c (cftr/mrp), member 8, Rapgef3 - rap guanine nucleotide exchange factor (gef) 3, Akap6 - a kinase (prka) a…
	GO:0006691	leukotriene metabolic process	8.12e-05	7.68	19	6	[Fcer1a - fc receptor, ige, high affinity i, alpha polypeptide, Cyp4f18 - cytochrome p450, family 4, subfamily f, polypeptide 18, Mgst2 - microsomal glutathione s-transferase 2, Ggt5 - gamma-glutamyltransferase 5, Syk - spleen tyrosine kinase, Prg3 - proteoglycan 3]
	GO:0008347	glial cell migration	2.66e-05	7.4	23	7	[Apcdd1 - adenomatosis polyposis coli down-regulated 1, Cspg4 - chondroitin sulfate proteoglycan 4, Vcan - versican, Gpr56 - g protein-coupled receptor 56, Ccl3 - chemokine (c-c motif) ligand 3, Epha4 - eph receptor a4, Gli3 - gli-kruppel family member gli3]
	GO:0051482	positive regulation of cytosolic calcium ion concentration involved in phospholipase C-activating G-protein coupled signaling pathway	1.02e-08	7.36	43	13	[Gpr17 - g protein-coupled receptor 17, Gpr18 - g protein-coupled receptor 18, Ednra - endothelin receptor type a, Gpr65 - g-protein coupled receptor 65, Agtr1a - angiotensin ii receptor, type 1a, Lpar6 - lysophosphatidic acid receptor 6, Drd1a - dopamine receptor d1a, P2ry10 - purinergic receptor p2y, g-protein coupled 10, F2rl2 - coagulation factor ii (thrombin) receptor-like 2, Lpar4 - lysopho…
	GO:0032753	positive regulation of interleukin-4 production	3.62e-05	7.1	24	7	[Foxp3 - forkhead box p3, Cd28 - cd28 antigen, Sash3 - sam and sh3 domain containing 3, Epx - eosinophil peroxidase, Cd3e - cd3 antigen, epsilon polypeptide, Syk - spleen tyrosine kinase, Irf4 - interferon regulatory factor 4]
	GO:0046641	positive regulation of alpha-beta T cell proliferation	0.000151	6.95	21	6	[Rasal3 - ras protein activator like 3, Ptprc - protein tyrosine phosphatase, receptor type, c, Cd28 - cd28 antigen, Cd3e - cd3 antigen, epsilon polypeptide, Syk - spleen tyrosine kinase, Ceacam1 - carcinoembryonic antigen-related cell adhesion molecule 1]
	GO:0001964	startle response	0.000151	6.95	21	6	[Penk - preproenkephalin, Fabp7 - fatty acid binding protein 7, brain, Grin2d - glutamate receptor, ionotropic, nmda2d (epsilon 4), Grin2a - glutamate receptor, ionotropic, nmda2a (epsilon 1), Slitrk6 - slit and ntrk-like family, member 6, Csmd1 - cub and sushi multiple domains 1]
	GO:0038083	peptidyl-tyrosine autophosphorylation	3.1e-07	6.86	39	11	[Itk - il2 inducible t cell kinase, Ptk6 - ptk6 protein tyrosine kinase 6, Srms - src-related kinase lacking c-terminal regulatory tyrosine and n-terminal myristylation sites, Sla - src-like adaptor, Btk - bruton agammaglobulinemia tyrosine kinase, Frk - fyn-related kinase, Styk1 - serine/threonine/tyrosine kinase 1, Fgr - gardner-rasheed feline sarcoma viral (fgr) oncogene homolog, Insr - insuli…
	GO:0003170	heart valve development	0.000635	6.76	18	5	[Tnfrsf1b - tumor necrosis factor receptor superfamily, member 1b, Prdm1 - pr domain containing 1, with znf domain, Shox2 - short stature homeobox 2, Hey2 - hairy/enhancer-of-split related with yrpw motif 2, Smad6 - smad family member 6]
	GO:0032693	negative regulation of interleukin-10 production	0.000635	6.76	18	5	[Trib2 - tribbles homolog 2 (drosophila), Foxp3 - forkhead box p3, Cd84 - cd84 antigen, Epx - eosinophil peroxidase, Tnfrsf9 - tumor necrosis factor receptor superfamily, member 9]
	GO:0045076	regulation of interleukin-2 biosynthetic process	0.000635	6.76	18	5	[Foxp3 - forkhead box p3, Cd28 - cd28 antigen, Cd3e - cd3 antigen, epsilon polypeptide, Irf4 - interferon regulatory factor 4, Clec2i - c-type lectin domain family 2, member i]
	GO:0055064	chloride ion homeostasis	0.000635	6.76	18	5	[Car12 - carbonic anyhydrase 12, Slc12a8 - solute carrier family 12 (potassium/chloride transporters), member 8, Slc12a7 - solute carrier family 12, member 7, Slc12a5 - solute carrier family 12, member 5, Slc12a2 - solute carrier family 12, member 2]
	GO:0002710	negative regulation of T cell mediated immunity	0.000635	6.76	18	5	[Il7r - interleukin 7 receptor, Foxp3 - forkhead box p3, Ptprc - protein tyrosine phosphatase, receptor type, c, Slamf1 - signaling lymphocytic activation molecule family member 1, Smad7 - smad family member 7]
	GO:0032673	regulation of interleukin-4 production	2.06e-05	6.49	30	8	[Foxp3 - forkhead box p3, Cd83 - cd83 antigen, Cd28 - cd28 antigen, Sash3 - sam and sh3 domain containing 3, Epx - eosinophil peroxidase, Cd3e - cd3 antigen, epsilon polypeptide, Syk - spleen tyrosine kinase, Irf4 - interferon regulatory factor 4]
	GO:1902307	positive regulation of sodium ion transmembrane transport	0.000833	6.4	19	5	[Tesc - tescalcin, Plcb1 - phospholipase c, beta 1, Atp1b2 - atpase, na+/k+ transporting, beta 2 polypeptide, Atp1b1 - atpase, na+/k+ transporting, beta 1 polypeptide, Dmd - dystrophin, muscular dystrophy]
	GO:0007530	sex determination	8.35e-05	6.31	27	7	[Ar - androgen receptor, Fgf9 - fibroblast growth factor 9, Nr5a1 - nuclear receptor subfamily 5, group a, member 1, Cited2 - cbp/p300-interacting transactivator, with glu/asp-rich carboxy-terminal domain, 2, Tmem184a - transmembrane protein 184a, Insr - insulin receptor, Ptgdr - prostaglandin d receptor]
	GO:0097756	negative regulation of blood vessel diameter	3.83e-07	6.08	48	12	[Crp - c-reactive protein, pentraxin-related, Mgll - monoglyceride lipase, Htr2a - 5-hydroxytryptamine (serotonin) receptor 2a, Grip2 - glutamate receptor interacting protein 2, Ace - angiotensin i converting enzyme (peptidyl-dipeptidase a) 1, Ptgs1 - prostaglandin-endoperoxide synthase 1, Acta2 - actin, alpha 2, smooth muscle, aorta, Ednra - endothelin receptor type a, Agtr1a - angiotensin ii re…
	GO:0046456	icosanoid biosynthetic process	3.44e-05	6.08	32	8	[Fcer1a - fc receptor, ige, high affinity i, alpha polypeptide, Alox12 - arachidonate 12-lipoxygenase, Ptgs1 - prostaglandin-endoperoxide synthase 1, Mgst2 - microsomal glutathione s-transferase 2, Ggt5 - gamma-glutamyltransferase 5, Syk - spleen tyrosine kinase, Ptgds - prostaglandin d2 synthase (brain), Prg3 - proteoglycan 3]
	GO:0002691	regulation of cellular extravasation	0.000107	6.08	28	7	[Pdgfd - platelet-derived growth factor, d polypeptide, Plcb1 - phospholipase c, beta 1, Cxcl12 - chemokine (c-x-c motif) ligand 12, Il1r1 - interleukin 1 receptor, type i, Selp - selectin, platelet, Elane - elastase, neutrophil expressed, Plvap - plasmalemma vesicle associated protein]
	GO:0046579	positive regulation of Ras protein signal transduction	5.25e-08	5.98	57	14	[Gpr17 - g protein-coupled receptor 17, Gpr18 - g protein-coupled receptor 18, Gpr65 - g-protein coupled receptor 65, Lpar6 - lysophosphatidic acid receptor 6, Dock2 - dedicator of cyto-kinesis 2, P2ry10 - purinergic receptor p2y, g-protein coupled 10, Pdgfrb - platelet derived growth factor receptor, beta polypeptide, Rasgef1a - rasgef domain family, member 1a, Gpr56 - g protein-coupled receptor…
	GO:0002456	T cell mediated immunity	4.59e-06	5.93	41	10	[Gzmb - granzyme b, Foxp3 - forkhead box p3, Cd8a - cd8 antigen, alpha chain, Emp2 - epithelial membrane protein 2, Ctsc - cathepsin c, Slamf1 - signaling lymphocytic activation molecule family member 1, Il31ra - interleukin 31 receptor a, Myo1g - myosin ig, Il18rap - interleukin 18 receptor accessory protein, Serpinb9 - serine (or cysteine) peptidase inhibitor, clade b, member 9]
	GO:1901381	positive regulation of potassium ion transmembrane transport	1.42e-05	5.92	37	9	[Lrrc55 - leucine rich repeat containing 55, Gal - galanin, Atp1b2 - atpase, na+/k+ transporting, beta 2 polypeptide, Atp1b1 - atpase, na+/k+ transporting, beta 1 polypeptide, Kcnc2 - potassium voltage gated channel, shaw-related subfamily, member 2, Abcc8 - atp-binding cassette, sub-family c (cftr/mrp), member 8, Kcnq1 - potassium voltage-gated channel, subfamily q, member 1, Rapgef3 - rap guani…
	GO:0050853	B cell receptor signaling pathway	5.53e-05	5.72	34	8	[Itk - il2 inducible t cell kinase, Ptprc - protein tyrosine phosphatase, receptor type, c, Btk - bruton agammaglobulinemia tyrosine kinase, Cd79a - cd79a antigen (immunoglobulin-associated alpha), Nckap1l - nck associated protein 1 like, Syk - spleen tyrosine kinase, Cd19 - cd19 antigen, Blk - b lymphoid kinase]
	GO:0051057	positive regulation of small GTPase mediated signal transduction	3.47e-08	5.7	64	15	[Gpr17 - g protein-coupled receptor 17, Gpr18 - g protein-coupled receptor 18, Gpr65 - g-protein coupled receptor 65, Dock2 - dedicator of cyto-kinesis 2, Lpar6 - lysophosphatidic acid receptor 6, P2ry10 - purinergic receptor p2y, g-protein coupled 10, Pdgfrb - platelet derived growth factor receptor, beta polypeptide, Rasgef1a - rasgef domain family, member 1a, Gpr56 - g protein-coupled receptor…
	GO:0055075	potassium ion homeostasis	0.000172	5.68	30	7	[Atp1b2 - atpase, na+/k+ transporting, beta 2 polypeptide, Atp1b1 - atpase, na+/k+ transporting, beta 1 polypeptide, Slc12a8 - solute carrier family 12 (potassium/chloride transporters), member 8, Slc12a7 - solute carrier family 12, member 7, Slc12a5 - solute carrier family 12, member 5, Slc12a2 - solute carrier family 12, member 2, Kcna5 - potassium voltage-gated channel, shaker-related subfamil…
	GO:0010863	positive regulation of phospholipase C activity	0.000538	5.61	26	6	[Itk - il2 inducible t cell kinase, Flt1 - fms-like tyrosine kinase 1, Htr2a - 5-hydroxytryptamine (serotonin) receptor 2a, Adcyap1r1 - adenylate cyclase activating polypeptide 1 receptor 1, Sele - selectin, endothelial cell, Pdgfrb - platelet derived growth factor receptor, beta polypeptide]
	GO:0018108	peptidyl-tyrosine phosphorylation	1.38e-10	5.49	93	21	[Fgfr3 - fibroblast growth factor receptor 3, Il15 - interleukin 15, Sla - src-like adaptor, Agtr1a - angiotensin ii receptor, type 1a, Pdgfb - platelet derived growth factor, b polypeptide, Kit - kit oncogene, Fgr - gardner-rasheed feline sarcoma viral (fgr) oncogene homolog, Insr - insulin receptor, Lep - leptin, Pdgfrb - platelet derived growth factor receptor, beta polypeptide, Hck - hemopoie…
	GO:0046639	negative regulation of alpha-beta T cell differentiation	0.000668	5.41	27	6	[Foxp3 - forkhead box p3, Runx3 - runt related transcription factor 3, Hlx - h2.0-like homeobox, Gli3 - gli-kruppel family member gli3, Tnfsf18 - tumor necrosis factor (ligand) superfamily, member 18, Smad7 - smad family member 7]
	GO:0018212	peptidyl-tyrosine modification	2.59e-10	5.32	96	21	[Fgfr3 - fibroblast growth factor receptor 3, Il15 - interleukin 15, Sla - src-like adaptor, Agtr1a - angiotensin ii receptor, type 1a, Pdgfb - platelet derived growth factor, b polypeptide, Kit - kit oncogene, Fgr - gardner-rasheed feline sarcoma viral (fgr) oncogene homolog, Insr - insulin receptor, Lep - leptin, Pdgfrb - platelet derived growth factor receptor, beta polypeptide, Hck - hemopoie…
	GO:0050850	positive regulation of calcium-mediated signaling	1.39e-05	5.29	46	10	[Gstm7 - glutathione s-transferase, mu 7, Fcer1a - fc receptor, ige, high affinity i, alpha polypeptide, Hap1 - huntingtin-associated protein 1, Jph2 - junctophilin 2, Akap5 - a kinase (prka) anchor protein 5, Cd8a - cd8 antigen, alpha chain, Cd3e - cd3 antigen, epsilon polypeptide, Syk - spleen tyrosine kinase, Ceacam1 - carcinoembryonic antigen-related cell adhesion molecule 1, Akap6 - a kinase…
	GO:0008045	motor neuron axon guidance	0.000821	5.21	28	6	[Rnf165 - ring finger protein 165, Cxcl12 - chemokine (c-x-c motif) ligand 12, Hoxa1 - homeobox a1, Cxcr4 - chemokine (c-x-c motif) receptor 4, Epha4 - eph receptor a4, Kif5c - kinesin family member 5c]
	GO:0086091	regulation of heart rate by cardiac conduction	0.000324	5.16	33	7	[Dsp - desmoplakin, Kcne3 - potassium voltage-gated channel, isk-related subfamily, gene 3, Kcnq1 - potassium voltage-gated channel, subfamily q, member 1, Hcn4 - hyperpolarization-activated, cyclic nucleotide-gated k+ 4, Ctnna3 - catenin (cadherin associated protein), alpha 3, Cacna1c - calcium channel, voltage-dependent, l type, alpha 1c subunit, Kcna5 - potassium voltage-gated channel, shaker-…
	GO:0046640	regulation of alpha-beta T cell proliferation	0.000394	5.01	34	7	[Rasal3 - ras protein activator like 3, Ptprc - protein tyrosine phosphatase, receptor type, c, Cd28 - cd28 antigen, Cd3e - cd3 antigen, epsilon polypeptide, Syk - spleen tyrosine kinase, Ceacam1 - carcinoembryonic antigen-related cell adhesion molecule 1, Btla - b and t lymphocyte associated]
	GO:0051281	positive regulation of release of sequestered calcium ion into cytosol	0.000156	4.99	39	8	[Gstm7 - glutathione s-transferase, mu 7, Jph2 - junctophilin 2, Hap1 - huntingtin-associated protein 1, Ednra - endothelin receptor type a, F2rl3 - coagulation factor ii (thrombin) receptor-like 3, Akap6 - a kinase (prka) anchor protein 6, Drd1a - dopamine receptor d1a, Cd19 - cd19 antigen]
	GO:0010107	potassium ion import	0.000188	4.87	40	8	[Atp1b2 - atpase, na+/k+ transporting, beta 2 polypeptide, Atp1b1 - atpase, na+/k+ transporting, beta 1 polypeptide, Slc12a8 - solute carrier family 12 (potassium/chloride transporters), member 8, Slc12a7 - solute carrier family 12, member 7, Hcn4 - hyperpolarization-activated, cyclic nucleotide-gated k+ 4, Slc12a5 - solute carrier family 12, member 5, Kcnj15 - potassium inwardly-rectifying chann…
	GO:1901021	positive regulation of calcium ion transmembrane transporter activity	0.000475	4.87	35	7	[Gstm7 - glutathione s-transferase, mu 7, Jph2 - junctophilin 2, Hap1 - huntingtin-associated protein 1, Stac2 - sh3 and cysteine rich domain 2, Atp1b1 - atpase, na+/k+ transporting, beta 1 polypeptide, Kcne3 - potassium voltage-gated channel, isk-related subfamily, gene 3, Akap6 - a kinase (prka) anchor protein 6]
	GO:0045907	positive regulation of vasoconstriction	9e-05	4.76	46	9	[Htr2a - 5-hydroxytryptamine (serotonin) receptor 2a, Pde5a - phosphodiesterase 5a, cgmp-specific, Npy1r - neuropeptide y receptor y1, Ptgs1 - prostaglandin-endoperoxide synthase 1, Tacr1 - tachykinin receptor 1, Pdgfb - platelet derived growth factor, b polypeptide, Hrh2 - histamine receptor h2, Smad6 - smad family member 6, Hrh1 - histamine receptor h1]
	GO:0043268	positive regulation of potassium ion transport	9e-05	4.76	46	9	[Lrrc55 - leucine rich repeat containing 55, Atp1b2 - atpase, na+/k+ transporting, beta 2 polypeptide, Gal - galanin, Atp1b1 - atpase, na+/k+ transporting, beta 1 polypeptide, Kcnc2 - potassium voltage gated channel, shaw-related subfamily, member 2, Abcc8 - atp-binding cassette, sub-family c (cftr/mrp), member 8, Kcnq1 - potassium voltage-gated channel, subfamily q, member 1, Rapgef3 - rap guani…
	GO:1902476	chloride transmembrane transport	0.000107	4.66	47	9	[Slc26a10 - solute carrier family 26, member 10, Gabre - gamma-aminobutyric acid (gaba) a receptor, subunit epsilon, Slc1a1 - solute carrier family 1 (neuronal/epithelial high affinity glutamate transporter, system xag), member 1, Slc12a8 - solute carrier family 12 (potassium/chloride transporters), member 8, Slc12a7 - solute carrier family 12, member 7, Gabra2 - gamma-aminobutyric acid (gaba) a …
	GO:0042108	positive regulation of cytokine biosynthetic process	8.33e-06	4.63	63	12	[Fcer1a - fc receptor, ige, high affinity i, alpha polypeptide, Tlr7 - toll-like receptor 7, Hspb1 - heat shock protein 1, Cd28 - cd28 antigen, Cd3e - cd3 antigen, epsilon polypeptide, Cybb - cytochrome b-245, beta polypeptide, Tnfrsf13c - tumor necrosis factor receptor superfamily, member 13c, Syk - spleen tyrosine kinase, Irf4 - interferon regulatory factor 4, Elane - elastase, neutrophil expre…
	GO:0055117	regulation of cardiac muscle contraction	8.33e-06	4.63	63	12	[Dsp - desmoplakin, Pde5a - phosphodiesterase 5a, cgmp-specific, Atp1b1 - atpase, na+/k+ transporting, beta 1 polypeptide, Kcne3 - potassium voltage-gated channel, isk-related subfamily, gene 3, Kcnq1 - potassium voltage-gated channel, subfamily q, member 1, Hcn4 - hyperpolarization-activated, cyclic nucleotide-gated k+ 4, Dmd - dystrophin, muscular dystrophy, Chga - chromogranin a, Akap6 - a kin…
	GO:0010518	positive regulation of phospholipase activity	0.000269	4.63	42	8	[Fgfr3 - fibroblast growth factor receptor 3, Itk - il2 inducible t cell kinase, Flt1 - fms-like tyrosine kinase 1, Htr2a - 5-hydroxytryptamine (serotonin) receptor 2a, Adcyap1r1 - adenylate cyclase activating polypeptide 1 receptor 1, Sele - selectin, endothelial cell, Agtr1a - angiotensin ii receptor, type 1a, Pdgfrb - platelet derived growth factor receptor, beta polypeptide]
	GO:0042755	eating behavior	0.000269	4.63	42	8	[Cck - cholecystokinin, Ace - angiotensin i converting enzyme (peptidyl-dipeptidase a) 1, Tacr1 - tachykinin receptor 1, Uchl1 - ubiquitin carboxy-terminal hydrolase l1, Tcf15 - transcription factor 15, Lep - leptin, Drd1a - dopamine receptor d1a, Aoc3 - amine oxidase, copper containing 3]
	GO:0032414	positive regulation of ion transmembrane transporter activity	2.17e-08	4.62	100	19	[Arc - activity regulated cytoskeletal-associated protein, Gstm7 - glutathione s-transferase, mu 7, Stac2 - sh3 and cysteine rich domain 2, Lrrc55 - leucine rich repeat containing 55, Gal - galanin, Atp1b2 - atpase, na+/k+ transporting, beta 2 polypeptide, Atp1b1 - atpase, na+/k+ transporting, beta 1 polypeptide, Kcnc2 - potassium voltage gated channel, shaw-related subfamily, member 2, Abcc8 - a…
	GO:1901016	regulation of potassium ion transmembrane transporter activity	7.12e-05	4.42	55	10	[Lrrc55 - leucine rich repeat containing 55, Atp1b2 - atpase, na+/k+ transporting, beta 2 polypeptide, Gal - galanin, Atp1b1 - atpase, na+/k+ transporting, beta 1 polypeptide, Kcne3 - potassium voltage-gated channel, isk-related subfamily, gene 3, Kcnc2 - potassium voltage gated channel, shaw-related subfamily, member 2, Abcc8 - atp-binding cassette, sub-family c (cftr/mrp), member 8, Kcnq1 - pot…
	GO:0002707	negative regulation of lymphocyte mediated immunity	0.000375	4.42	44	8	[Il7r - interleukin 7 receptor, Foxp3 - forkhead box p3, Ptprc - protein tyrosine phosphatase, receptor type, c, Cd96 - cd96 antigen, Slamf1 - signaling lymphocytic activation molecule family member 1, Ceacam1 - carcinoembryonic antigen-related cell adhesion molecule 1, Smad7 - smad family member 7, Serpinb9 - serine (or cysteine) peptidase inhibitor, clade b, member 9]
	GO:1901570	fatty acid derivative biosynthetic process	0.000375	4.42	44	8	[Fcer1a - fc receptor, ige, high affinity i, alpha polypeptide, Alox12 - arachidonate 12-lipoxygenase, Ptgs1 - prostaglandin-endoperoxide synthase 1, Mgst2 - microsomal glutathione s-transferase 2, Ggt5 - gamma-glutamyltransferase 5, Syk - spleen tyrosine kinase, Ptgds - prostaglandin d2 synthase (brain), Prg3 - proteoglycan 3]
	GO:0046634	regulation of alpha-beta T cell activation	1.21e-07	4.38	100	18	[Rasal3 - ras protein activator like 3, Foxp3 - forkhead box p3, Ikzf1 - ikaros family zinc finger 1, Runx3 - runt related transcription factor 3, Ptprc - protein tyrosine phosphatase, receptor type, c, Prdm1 - pr domain containing 1, with znf domain, Cd3e - cd3 antigen, epsilon polypeptide, Tnfsf18 - tumor necrosis factor (ligand) superfamily, member 18, Smad7 - smad family member 7, Cd83 - cd83…
	GO:0006939	smooth muscle contraction	0.000177	4.38	50	9	[Sulf1 - sulfatase 1, Htr2a - 5-hydroxytryptamine (serotonin) receptor 2a, Grip2 - glutamate receptor interacting protein 2, Npy1r - neuropeptide y receptor y1, Ednra - endothelin receptor type a, Acta2 - actin, alpha 2, smooth muscle, aorta, Tacr1 - tachykinin receptor 1, Cacna1c - calcium channel, voltage-dependent, l type, alpha 1c subunit, Drd1a - dopamine receptor d1a]
	GO:0003281	ventricular septum development	0.000941	4.37	39	7	[Heg1 - heg homolog 1 (zebrafish), Prdm1 - pr domain containing 1, with znf domain, Tbx5 - t-box 5, Cited2 - cbp/p300-interacting transactivator, with glu/asp-rich carboxy-terminal domain, 2, Cxcr4 - chemokine (c-x-c motif) receptor 4, Smad6 - smad family member 6, Ptk7 - ptk7 protein tyrosine kinase 7]
	GO:0048514	blood vessel morphogenesis	5.8e-08	4.36	106	19	[Mkl2 - mkl/myocardin-like 2, Hoxa1 - homeobox a1, Itga7 - integrin alpha 7, Prdm1 - pr domain containing 1, with znf domain, Cited2 - cbp/p300-interacting transactivator, with glu/asp-rich carboxy-terminal domain, 2, Pdgfb - platelet derived growth factor, b polypeptide, Col4a1 - collagen, type iv, alpha 1, Hey2 - hairy/enhancer-of-split related with yrpw motif 2, Fzd4 - frizzled homolog 4 (dros…
	GO:0046637	regulation of alpha-beta T cell differentiation	1.61e-05	4.36	67	12	[Foxp3 - forkhead box p3, Runx3 - runt related transcription factor 3, Ikzf1 - ikaros family zinc finger 1, Cd83 - cd83 antigen, Hlx - h2.0-like homeobox, Sash3 - sam and sh3 domain containing 3, Prdm1 - pr domain containing 1, with znf domain, Nckap1l - nck associated protein 1 like, Syk - spleen tyrosine kinase, Gli3 - gli-kruppel family member gli3, Tnfsf18 - tumor necrosis factor (ligand) sup…
	GO:0010524	positive regulation of calcium ion transport into cytosol	8.35e-05	4.34	56	10	[Gstm7 - glutathione s-transferase, mu 7, Jph2 - junctophilin 2, Akap5 - a kinase (prka) anchor protein 5, Hap1 - huntingtin-associated protein 1, Adcyap1r1 - adenylate cyclase activating polypeptide 1 receptor 1, Ednra - endothelin receptor type a, F2rl3 - coagulation factor ii (thrombin) receptor-like 3, Akap6 - a kinase (prka) anchor protein 6, Drd1a - dopamine receptor d1a, Cd19 - cd19 antige…
	GO:0071675	regulation of mononuclear cell migration	0.00044	4.33	45	8	[Pdgfd - platelet-derived growth factor, d polypeptide, Plcb1 - phospholipase c, beta 1, Cx3cl1 - chemokine (c-x3-c motif) ligand 1, Cxcl12 - chemokine (c-x-c motif) ligand 12, Slamf1 - signaling lymphocytic activation molecule family member 1, Slamf8 - slam family member 8, Tnfsf18 - tumor necrosis factor (ligand) superfamily, member 18, Ptprj - protein tyrosine phosphatase, receptor type, j]
	GO:0046632	alpha-beta T cell differentiation	0.00044	4.33	45	8	[Itk - il2 inducible t cell kinase, Foxp3 - forkhead box p3, Il18r1 - interleukin 18 receptor 1, Bcl11b - b cell leukemia/lymphoma 11b, Gpr18 - g protein-coupled receptor 18, Nkx2-3 - nk2 homeobox 3, Psmb11 - proteasome (prosome, macropain) subunit, beta type, 11, Rsad2 - radical s-adenosyl methionine domain containing 2]
	GO:0032411	positive regulation of transporter activity	6.78e-08	4.32	107	19	[Arc - activity regulated cytoskeletal-associated protein, Gstm7 - glutathione s-transferase, mu 7, Stac2 - sh3 and cysteine rich domain 2, Lrrc55 - leucine rich repeat containing 55, Atp1b2 - atpase, na+/k+ transporting, beta 2 polypeptide, Gal - galanin, Atp1b1 - atpase, na+/k+ transporting, beta 1 polypeptide, Kcnc2 - potassium voltage gated channel, shaw-related subfamily, member 2, Abcc8 - a…
	GO:1903524	positive regulation of blood circulation	1.75e-06	4.29	85	15	[Htr2a - 5-hydroxytryptamine (serotonin) receptor 2a, Ptgs1 - prostaglandin-endoperoxide synthase 1, Npy1r - neuropeptide y receptor y1, Tacr1 - tachykinin receptor 1, Pdgfb - platelet derived growth factor, b polypeptide, Hey2 - hairy/enhancer-of-split related with yrpw motif 2, Smad6 - smad family member 6, Apln - apelin, Olfr78 - olfactory receptor 78, Slc1a1 - solute carrier family 1 (neurona…
	GO:0019229	regulation of vasoconstriction	9.76e-07	4.23	92	16	[Htr2a - 5-hydroxytryptamine (serotonin) receptor 2a, Ptgs1 - prostaglandin-endoperoxide synthase 1, Npy1r - neuropeptide y receptor y1, Tacr1 - tachykinin receptor 1, Agtr1a - angiotensin ii receptor, type 1a, Pdgfb - platelet derived growth factor, b polypeptide, Lep - leptin, Drd1a - dopamine receptor d1a, Cacna1c - calcium channel, voltage-dependent, l type, alpha 1c subunit, Smad6 - smad fam…
	GO:0002449	lymphocyte mediated immunity	2.19e-05	4.23	69	12	[Gzmb - granzyme b, Foxp3 - forkhead box p3, Cd8a - cd8 antigen, alpha chain, Emp2 - epithelial membrane protein 2, Ctsc - cathepsin c, Slamf1 - signaling lymphocytic activation molecule family member 1, Il31ra - interleukin 31 receptor a, Myo1g - myosin ig, Il18rap - interleukin 18 receptor accessory protein, H2-DMa - histocompatibility 2, class ii, locus dma, Klrd1 - killer cell lectin-like rec…
	GO:0071622	regulation of granulocyte chemotaxis	0.000514	4.23	46	8	[Cx3cl1 - chemokine (c-x3-c motif) ligand 1, Ednra - endothelin receptor type a, Nckap1l - nck associated protein 1 like, Slamf1 - signaling lymphocytic activation molecule family member 1, Sell - selectin, lymphocyte, Cxcr2 - chemokine (c-x-c motif) receptor 2, Tnfsf18 - tumor necrosis factor (ligand) superfamily, member 18, Ptprj - protein tyrosine phosphatase, receptor type, j]
	GO:0006690	icosanoid metabolic process	1.04e-05	4.22	75	13	[Mgll - monoglyceride lipase, Cyp4f18 - cytochrome p450, family 4, subfamily f, polypeptide 18, Alox12 - arachidonate 12-lipoxygenase, Ptgs1 - prostaglandin-endoperoxide synthase 1, Mgst2 - microsomal glutathione s-transferase 2, Cyp2d11 - cytochrome p450, family 2, subfamily d, polypeptide 11, Prg3 - proteoglycan 3, Fcer1a - fc receptor, ige, high affinity i, alpha polypeptide, Cyp2d22 - cytochr…
	GO:1904427	positive regulation of calcium ion transmembrane transport	3.94e-05	4	73	12	[Gstm7 - glutathione s-transferase, mu 7, Jph2 - junctophilin 2, Hap1 - huntingtin-associated protein 1, Stac2 - sh3 and cysteine rich domain 2, Atp1b1 - atpase, na+/k+ transporting, beta 1 polypeptide, Ednra - endothelin receptor type a, Kcne3 - potassium voltage-gated channel, isk-related subfamily, gene 3, F2rl3 - coagulation factor ii (thrombin) receptor-like 3, Rapgef3 - rap guanine nucleoti…
	GO:0006909	phagocytosis	8.3e-05	3.99	67	11	[Anxa3 - annexin a3, Prtn3 - proteinase 3, Icam5 - intercellular adhesion molecule 5, telencephalin, Syt7 - synaptotagmin vii, Slamf1 - signaling lymphocytic activation molecule family member 1, Myo1g - myosin ig, Gulp1 - gulp, engulfment adaptor ptb domain containing 1, Elane - elastase, neutrophil expressed, Lep - leptin, Mfge8 - milk fat globule-egf factor 8 protein, Hck - hemopoietic cell kin…
	GO:0098661	inorganic anion transmembrane transport	0.000176	3.99	61	10	[Slc26a10 - solute carrier family 26, member 10, Slc37a2 - solute carrier family 37 (glycerol-3-phosphate transporter), member 2, Gabre - gamma-aminobutyric acid (gaba) a receptor, subunit epsilon, Slc1a1 - solute carrier family 1 (neuronal/epithelial high affinity glutamate transporter, system xag), member 1, Slc12a8 - solute carrier family 12 (potassium/chloride transporters), member 8, Gabra2 …
	GO:0051928	positive regulation of calcium ion transport	1.41e-07	3.96	123	20	[Atp2b2 - atpase, ca++ transporting, plasma membrane 2, Gstm7 - glutathione s-transferase, mu 7, Stac2 - sh3 and cysteine rich domain 2, Atp1b1 - atpase, na+/k+ transporting, beta 1 polypeptide, Ednra - endothelin receptor type a, Pdgfb - platelet derived growth factor, b polypeptide, Akap6 - a kinase (prka) anchor protein 6, Drd1a - dopamine receptor d1a, Pdgfrb - platelet derived growth factor …
	GO:2001259	positive regulation of cation channel activity	9.54e-05	3.94	68	11	[Gstm7 - glutathione s-transferase, mu 7, Arc - activity regulated cytoskeletal-associated protein, Jph2 - junctophilin 2, Hap1 - huntingtin-associated protein 1, Stac2 - sh3 and cysteine rich domain 2, Lrrc55 - leucine rich repeat containing 55, Gal - galanin, Kcne3 - potassium voltage-gated channel, isk-related subfamily, gene 3, Kcnc2 - potassium voltage gated channel, shaw-related subfamily, …
	GO:0006942	regulation of striated muscle contraction	5.19e-05	3.89	75	12	[Dsp - desmoplakin, Pde5a - phosphodiesterase 5a, cgmp-specific, Atp1b1 - atpase, na+/k+ transporting, beta 1 polypeptide, Kcne3 - potassium voltage-gated channel, isk-related subfamily, gene 3, Kcnq1 - potassium voltage-gated channel, subfamily q, member 1, Hcn4 - hyperpolarization-activated, cyclic nucleotide-gated k+ 4, Dmd - dystrophin, muscular dystrophy, Chga - chromogranin a, Akap6 - a kin…
	GO:0043370	regulation of CD4-positive, alpha-beta T cell differentiation	0.000915	3.89	50	8	[Foxp3 - forkhead box p3, Runx3 - runt related transcription factor 3, Cd83 - cd83 antigen, Hlx - h2.0-like homeobox, Sash3 - sam and sh3 domain containing 3, Nckap1l - nck associated protein 1 like, Tnfsf18 - tumor necrosis factor (ligand) superfamily, member 18, Smad7 - smad family member 7]
	GO:0007219	Notch signaling pathway	4.4e-07	3.85	120	19	[Dner - delta/notch-like egf-related receptor, Nrip2 - nuclear receptor interacting protein 2, Maml3 - mastermind like 3 (drosophila), Susd5 - sushi domain containing 5, Jag2 - jagged 2, Xirp1 - xin actin-binding repeat containing 1, Neurl1b - neuralized homolog 1b (drosophila), Snai2 - snail homolog 2 (drosophila), Hey2 - hairy/enhancer-of-split related with yrpw motif 2, Nrarp - notch-regulated…
	GO:0071804	cellular potassium ion transport	1.16e-07	3.84	133	21	[Kcns3 - potassium voltage-gated channel, delayed-rectifier, subfamily s, member 3, Kcnb1 - potassium voltage gated channel, shab-related subfamily, member 1, Kcnq4 - potassium voltage-gated channel, subfamily q, member 4, Lrrc55 - leucine rich repeat containing 55, Atp1b2 - atpase, na+/k+ transporting, beta 2 polypeptide, Atp1b1 - atpase, na+/k+ transporting, beta 1 polypeptide, Kcng4 - potassiu…
	GO:0071805	potassium ion transmembrane transport	1.16e-07	3.84	133	21	[Kcns3 - potassium voltage-gated channel, delayed-rectifier, subfamily s, member 3, Kcnb1 - potassium voltage gated channel, shab-related subfamily, member 1, Kcnq4 - potassium voltage-gated channel, subfamily q, member 4, Lrrc55 - leucine rich repeat containing 55, Atp1b2 - atpase, na+/k+ transporting, beta 2 polypeptide, Atp1b1 - atpase, na+/k+ transporting, beta 1 polypeptide, Kcng4 - potassiu…
	GO:1904064	positive regulation of cation transmembrane transport	1.06e-07	3.72	144	22	[Arc - activity regulated cytoskeletal-associated protein, Gstm7 - glutathione s-transferase, mu 7, Stac2 - sh3 and cysteine rich domain 2, Lrrc55 - leucine rich repeat containing 55, Atp1b2 - atpase, na+/k+ transporting, beta 2 polypeptide, Gal - galanin, Atp1b1 - atpase, na+/k+ transporting, beta 1 polypeptide, Ednra - endothelin receptor type a, Kcnc2 - potassium voltage gated channel, shaw-re…
	GO:0034767	positive regulation of ion transmembrane transport	4.06e-08	3.65	160	24	[Arc - activity regulated cytoskeletal-associated protein, Gstm7 - glutathione s-transferase, mu 7, Stac2 - sh3 and cysteine rich domain 2, Lrrc55 - leucine rich repeat containing 55, Atp1b2 - atpase, na+/k+ transporting, beta 2 polypeptide, Gal - galanin, Atp1b1 - atpase, na+/k+ transporting, beta 1 polypeptide, Ednra - endothelin receptor type a, Kcnc2 - potassium voltage gated channel, shaw-re…
	GO:0035296	regulation of tube diameter	2.5e-08	3.62	168	25	[Mgll - monoglyceride lipase, Ptgs1 - prostaglandin-endoperoxide synthase 1, Ednra - endothelin receptor type a, Agtr1a - angiotensin ii receptor, type 1a, Drd1a - dopamine receptor d1a, Apln - apelin, P2ry2 - purinergic receptor p2y, g-protein coupled 2, Pde5a - phosphodiesterase 5a, cgmp-specific, Ace - angiotensin i converting enzyme (peptidyl-dipeptidase a) 1, Grip2 - glutamate receptor inter…
	GO:0097746	regulation of blood vessel diameter	2.5e-08	3.62	168	25	[Mgll - monoglyceride lipase, Ptgs1 - prostaglandin-endoperoxide synthase 1, Ednra - endothelin receptor type a, Agtr1a - angiotensin ii receptor, type 1a, Drd1a - dopamine receptor d1a, Apln - apelin, P2ry2 - purinergic receptor p2y, g-protein coupled 2, Pde5a - phosphodiesterase 5a, cgmp-specific, Ace - angiotensin i converting enzyme (peptidyl-dipeptidase a) 1, Grip2 - glutamate receptor inter…
	GO:2000514	regulation of CD4-positive, alpha-beta T cell activation	0.000817	3.59	61	9	[Foxp3 - forkhead box p3, Runx3 - runt related transcription factor 3, Cd83 - cd83 antigen, Hlx - h2.0-like homeobox, Sash3 - sam and sh3 domain containing 3, Nckap1l - nck associated protein 1 like, Ceacam1 - carcinoembryonic antigen-related cell adhesion molecule 1, Tnfsf18 - tumor necrosis factor (ligand) superfamily, member 18, Smad7 - smad family member 7]
	GO:0019233	sensory perception of pain	0.000235	3.57	75	11	[P2ry2 - purinergic receptor p2y, g-protein coupled 2, Penk - preproenkephalin, Htr2a - 5-hydroxytryptamine (serotonin) receptor 2a, Ace - angiotensin i converting enzyme (peptidyl-dipeptidase a) 1, Npy1r - neuropeptide y receptor y1, Ptgs1 - prostaglandin-endoperoxide synthase 1, Ednra - endothelin receptor type a, Tacr1 - tachykinin receptor 1, Uchl1 - ubiquitin carboxy-terminal hydrolase l1, G…
	GO:0001676	long-chain fatty acid metabolic process	0.000493	3.53	69	10	[Gstm7 - glutathione s-transferase, mu 7, Cyp4f18 - cytochrome p450, family 4, subfamily f, polypeptide 18, Acot11 - acyl-coa thioesterase 11, Mgll - monoglyceride lipase, Alox12 - arachidonate 12-lipoxygenase, Slc27a3 - solute carrier family 27 (fatty acid transporter), member 3, Ptgs1 - prostaglandin-endoperoxide synthase 1, Cyp2d22 - cytochrome p450, family 2, subfamily d, polypeptide 22, Lipe…
	GO:0048844	artery morphogenesis	0.000922	3.53	62	9	[Notch3 - notch 3, Hoxa1 - homeobox a1, Prdm1 - pr domain containing 1, with znf domain, Cited2 - cbp/p300-interacting transactivator, with glu/asp-rich carboxy-terminal domain, 2, Tbx2 - t-box 2, Hey2 - hairy/enhancer-of-split related with yrpw motif 2, Prrx1 - paired related homeobox 1, Smad7 - smad family member 7, Pdgfrb - platelet derived growth factor receptor, beta polypeptide]
	GO:1901379	regulation of potassium ion transmembrane transport	0.000334	3.43	78	11	[Lrrc55 - leucine rich repeat containing 55, Atp1b2 - atpase, na+/k+ transporting, beta 2 polypeptide, Gal - galanin, Atp1b1 - atpase, na+/k+ transporting, beta 1 polypeptide, Kcne3 - potassium voltage-gated channel, isk-related subfamily, gene 3, Kcnc2 - potassium voltage gated channel, shaw-related subfamily, member 2, Abcc8 - atp-binding cassette, sub-family c (cftr/mrp), member 8, Kcnq1 - pot…
	GO:0006813	potassium ion transport	5.55e-07	3.39	158	22	[Kcns3 - potassium voltage-gated channel, delayed-rectifier, subfamily s, member 3, Kcnb1 - potassium voltage gated channel, shab-related subfamily, member 1, Kcnq4 - potassium voltage-gated channel, subfamily q, member 4, Lrrc55 - leucine rich repeat containing 55, Atp1b2 - atpase, na+/k+ transporting, beta 2 polypeptide, Atp1b1 - atpase, na+/k+ transporting, beta 1 polypeptide, Kcng4 - potassiu…
	GO:1903035	negative regulation of response to wounding	0.000373	3.39	79	11	[Cd34 - cd34 antigen, Alox12 - arachidonate 12-lipoxygenase, Klk8 - kallikrein related-peptidase 8, Eppk1 - epiplakin 1, Wfdc1 - wap four-disulfide core domain 1, Pdgfb - platelet derived growth factor, b polypeptide, Epha4 - eph receptor a4, Abcc8 - atp-binding cassette, sub-family c (cftr/mrp), member 8, Ceacam1 - carcinoembryonic antigen-related cell adhesion molecule 1, C1qtnf1 - c1q and tumo…
	GO:0050880	regulation of blood vessel size	1e-07	3.38	180	25	[Mgll - monoglyceride lipase, Ptgs1 - prostaglandin-endoperoxide synthase 1, Ednra - endothelin receptor type a, Agtr1a - angiotensin ii receptor, type 1a, Drd1a - dopamine receptor d1a, Apln - apelin, P2ry2 - purinergic receptor p2y, g-protein coupled 2, Pde5a - phosphodiesterase 5a, cgmp-specific, Ace - angiotensin i converting enzyme (peptidyl-dipeptidase a) 1, Grip2 - glutamate receptor inter…
	GO:0055067	monovalent inorganic cation homeostasis	6.33e-06	3.37	130	18	[Car12 - carbonic anyhydrase 12, Slc26a10 - solute carrier family 26, member 10, Car7 - carbonic anhydrase 7, Atp1b2 - atpase, na+/k+ transporting, beta 2 polypeptide, Atp1b1 - atpase, na+/k+ transporting, beta 1 polypeptide, Agtr1a - angiotensin ii receptor, type 1a, Slc12a8 - solute carrier family 12 (potassium/chloride transporters), member 8, Slc12a5 - solute carrier family 12, member 5, Atp6…
	GO:0035150	regulation of tube size	1.12e-07	3.36	181	25	[Mgll - monoglyceride lipase, Ptgs1 - prostaglandin-endoperoxide synthase 1, Ednra - endothelin receptor type a, Agtr1a - angiotensin ii receptor, type 1a, Drd1a - dopamine receptor d1a, Apln - apelin, P2ry2 - purinergic receptor p2y, g-protein coupled 2, Pde5a - phosphodiesterase 5a, cgmp-specific, Ace - angiotensin i converting enzyme (peptidyl-dipeptidase a) 1, Grip2 - glutamate receptor inter…
	GO:0050848	regulation of calcium-mediated signaling	0.000121	3.36	94	13	[Gstm7 - glutathione s-transferase, mu 7, Tbc1d10c - tbc1 domain family, member 10c, Cd3e - cd3 antigen, epsilon polypeptide, Dmd - dystrophin, muscular dystrophy, Akap6 - a kinase (prka) anchor protein 6, Fcer1a - fc receptor, ige, high affinity i, alpha polypeptide, Hap1 - huntingtin-associated protein 1, Akap5 - a kinase (prka) anchor protein 5, Jph2 - junctophilin 2, Cd8a - cd8 antigen, alpha…
	GO:0003018	vascular process in circulatory system	2.26e-08	3.34	204	28	[Mgll - monoglyceride lipase, Ptgs1 - prostaglandin-endoperoxide synthase 1, Ednra - endothelin receptor type a, Agtr1a - angiotensin ii receptor, type 1a, Drd1a - dopamine receptor d1a, Apln - apelin, P2ry2 - purinergic receptor p2y, g-protein coupled 2, Pde5a - phosphodiesterase 5a, cgmp-specific, Grip2 - glutamate receptor interacting protein 2, Ace - angiotensin i converting enzyme (peptidyl-…
	GO:0035023	regulation of Rho protein signal transduction	1.79e-05	3.26	127	17	[Eps8l2 - eps8-like 2, Gpr17 - g protein-coupled receptor 17, Gpr18 - g protein-coupled receptor 18, Fgd3 - fyve, rhogef and ph domain containing 3, Gpr65 - g-protein coupled receptor 65, Lpar6 - lysophosphatidic acid receptor 6, Plekhg6 - pleckstrin homology domain containing, family g (with rhogef domain) member 6, P2ry10 - purinergic receptor p2y, g-protein coupled 10, Pdgfrb - platelet derive…
	GO:1901568	fatty acid derivative metabolic process	0.000167	3.26	97	13	[Cyp4f18 - cytochrome p450, family 4, subfamily f, polypeptide 18, Mgll - monoglyceride lipase, Alox12 - arachidonate 12-lipoxygenase, Ptgs1 - prostaglandin-endoperoxide synthase 1, Mgst2 - microsomal glutathione s-transferase 2, Cyp2d11 - cytochrome p450, family 2, subfamily d, polypeptide 11, Prg3 - proteoglycan 3, Fcer1a - fc receptor, ige, high affinity i, alpha polypeptide, Cyp2d22 - cytochr…
	GO:0051480	regulation of cytosolic calcium ion concentration	9.96e-12	3.25	322	43	[Atp2b2 - atpase, ca++ transporting, plasma membrane 2, Gpr17 - g protein-coupled receptor 17, Gpr18 - g protein-coupled receptor 18, Ednra - endothelin receptor type a, Gpr65 - g-protein coupled receptor 65, Agtr1a - angiotensin ii receptor, type 1a, Lpar6 - lysophosphatidic acid receptor 6, P2ry10 - purinergic receptor p2y, g-protein coupled 10, Drd1a - dopamine receptor d1a, P2ry2 - purinergic…
	GO:0007204	positive regulation of cytosolic calcium ion concentration	1.68e-10	3.24	285	38	[Gpr17 - g protein-coupled receptor 17, Gpr18 - g protein-coupled receptor 18, Ednra - endothelin receptor type a, Gpr65 - g-protein coupled receptor 65, Agtr1a - angiotensin ii receptor, type 1a, Lpar6 - lysophosphatidic acid receptor 6, P2ry10 - purinergic receptor p2y, g-protein coupled 10, Drd1a - dopamine receptor d1a, P2ry2 - purinergic receptor p2y, g-protein coupled 2, Akap5 - a kinase (p…
	GO:2000243	positive regulation of reproductive process	0.000963	3.24	75	10	[P2ry2 - purinergic receptor p2y, g-protein coupled 2, Plcb1 - phospholipase c, beta 1, Ar - androgen receptor, Pde5a - phosphodiesterase 5a, cgmp-specific, Nr5a1 - nuclear receptor subfamily 5, group a, member 1, Ovol1 - ovo homolog-like 1 (drosophila), Cited2 - cbp/p300-interacting transactivator, with glu/asp-rich carboxy-terminal domain, 2, Retn - resistin, Insr - insulin receptor, Plb1 - pho…
	GO:0014910	regulation of smooth muscle cell migration	0.000575	3.22	83	11	[P2ry2 - purinergic receptor p2y, g-protein coupled 2, Pdgfd - platelet-derived growth factor, d polypeptide, Rapgef4 - rap guanine nucleotide exchange factor (gef) 4, Ace - angiotensin i converting enzyme (peptidyl-dipeptidase a) 1, P2ry6 - pyrimidinergic receptor p2y, g-protein coupled, 6, Tacr1 - tachykinin receptor 1, Sorl1 - sortilin-related receptor, ldlr class a repeats-containing, Retn - …
	GO:0043266	regulation of potassium ion transport	0.000112	3.21	106	14	[Lrrc55 - leucine rich repeat containing 55, Htr2a - 5-hydroxytryptamine (serotonin) receptor 2a, Atp1b2 - atpase, na+/k+ transporting, beta 2 polypeptide, Gal - galanin, Atp1b1 - atpase, na+/k+ transporting, beta 1 polypeptide, Kcnc2 - potassium voltage gated channel, shaw-related subfamily, member 2, Abcc8 - atp-binding cassette, sub-family c (cftr/mrp), member 8, Kcnip3 - kv channel interactin…
	GO:0045619	regulation of lymphocyte differentiation	8.73e-07	3.2	175	23	[Il15 - interleukin 15, Il7r - interleukin 7 receptor, Foxp3 - forkhead box p3, Ikzf1 - ikaros family zinc finger 1, Runx3 - runt related transcription factor 3, H2-Aa - histocompatibility 2, class ii antigen a, alpha, Ikzf3 - ikaros family zinc finger 3, Ptprc - protein tyrosine phosphatase, receptor type, c, Prdm1 - pr domain containing 1, with znf domain, Nrarp - notch-regulated ankyrin repeat…
	GO:0072091	regulation of stem cell proliferation	0.000637	3.19	84	11	[Dppa2 - developmental pluripotency associated 2, Ptprc - protein tyrosine phosphatase, receptor type, c, Ace - angiotensin i converting enzyme (peptidyl-dipeptidase a) 1, Cx3cl1 - chemokine (c-x3-c motif) ligand 1, Vegfc - vascular endothelial growth factor c, Ovol1 - ovo homolog-like 1 (drosophila), Tbx3 - t-box 3, Sox17 - sry-box containing gene 17, Snai2 - snail homolog 2 (drosophila), Gli3 -…
	GO:0050731	positive regulation of peptidyl-tyrosine phosphorylation	5.84e-07	3.17	184	24	[Fgfr3 - fibroblast growth factor receptor 3, Il15 - interleukin 15, Htr2a - 5-hydroxytryptamine (serotonin) receptor 2a, Dlg3 - discs, large homolog 3 (drosophila), Areg - amphiregulin, Vegfc - vascular endothelial growth factor c, Cd3e - cd3 antigen, epsilon polypeptide, Il31ra - interleukin 31 receptor a, Pdgfb - platelet derived growth factor, b polypeptide, Kit - kit oncogene, Stap1 - signal…
	GO:0097530	granulocyte migration	0.000381	3.17	92	12	[Cxcl5 - chemokine (c-x-c motif) ligand 5, Prtn3 - proteinase 3, Ccl11 - chemokine (c-c motif) ligand 11, Cx3cl1 - chemokine (c-x3-c motif) ligand 1, Epx - eosinophil peroxidase, Ccl3 - chemokine (c-c motif) ligand 3, Nckap1l - nck associated protein 1 like, Syk - spleen tyrosine kinase, Cxcr2 - chemokine (c-x-c motif) receptor 2, Cxcl11 - chemokine (c-x-c motif) ligand 11, Hrh1 - histamine recep…
	GO:1903522	regulation of blood circulation	2.11e-08	3.12	242	31	[Ptgs1 - prostaglandin-endoperoxide synthase 1, Atp1b1 - atpase, na+/k+ transporting, beta 1 polypeptide, Agtr1a - angiotensin ii receptor, type 1a, Dmd - dystrophin, muscular dystrophy, Drd1a - dopamine receptor d1a, Apln - apelin, Olfr78 - olfactory receptor 78, Dsp - desmoplakin, Pde5a - phosphodiesterase 5a, cgmp-specific, Cx3cl1 - chemokine (c-x3-c motif) ligand 1, Kcne3 - potassium voltage-…
	GO:0007631	feeding behavior	0.000278	3.1	102	13	[Gal - galanin, Npy1r - neuropeptide y receptor y1, Tacr1 - tachykinin receptor 1, Agtr1a - angiotensin ii receptor, type 1a, Ntrk2 - neurotrophic tyrosine kinase, receptor, type 2, Tcf15 - transcription factor 15, Drd1a - dopamine receptor d1a, Lep - leptin, Apln - apelin, Cck - cholecystokinin, Ace - angiotensin i converting enzyme (peptidyl-dipeptidase a) 1, Uchl1 - ubiquitin carboxy-terminal …
	GO:0050851	antigen receptor-mediated signaling pathway	0.000184	3.07	111	14	[Foxp3 - forkhead box p3, Ptprc - protein tyrosine phosphatase, receptor type, c, Cd3e - cd3 antigen, epsilon polypeptide, Skap1 - src family associated phosphoprotein 1, Clec2i - c-type lectin domain family 2, member i, Itk - il2 inducible t cell kinase, Cd28 - cd28 antigen, Btk - bruton agammaglobulinemia tyrosine kinase, Nckap1l - nck associated protein 1 like, Cd79a - cd79a antigen (immunoglo…
	GO:0003013	circulatory system process	1.03e-07	3.04	232	29	[Mgll - monoglyceride lipase, Ptgs1 - prostaglandin-endoperoxide synthase 1, Ednra - endothelin receptor type a, Agtr1a - angiotensin ii receptor, type 1a, Drd1a - dopamine receptor d1a, Apln - apelin, P2ry2 - purinergic receptor p2y, g-protein coupled 2, Pde5a - phosphodiesterase 5a, cgmp-specific, Grip2 - glutamate receptor interacting protein 2, Ace - angiotensin i converting enzyme (peptidyl-…
	GO:0061041	regulation of wound healing	7.28e-05	3.04	128	16	[Alox12 - arachidonate 12-lipoxygenase, Pdgfb - platelet derived growth factor, b polypeptide, Abcc8 - atp-binding cassette, sub-family c (cftr/mrp), member 8, S100a9 - s100 calcium binding protein a9 (calgranulin b), Ptprj - protein tyrosine phosphatase, receptor type, j, Cd34 - cd34 antigen, Acta2 - actin, alpha 2, smooth muscle, aorta, Hbegf - heparin-binding egf-like growth factor, Eppk1 - ep…
	GO:0043270	positive regulation of ion transport	2e-09	3.03	297	37	[Arc - activity regulated cytoskeletal-associated protein, Atp2b2 - atpase, ca++ transporting, plasma membrane 2, Cyp4f18 - cytochrome p450, family 4, subfamily f, polypeptide 18, Gal - galanin, Atp1b2 - atpase, na+/k+ transporting, beta 2 polypeptide, Atp1b1 - atpase, na+/k+ transporting, beta 1 polypeptide, Ednra - endothelin receptor type a, Kcnc2 - potassium voltage gated channel, shaw-relate…
	GO:0034764	positive regulation of transmembrane transport	3.08e-07	3.03	217	27	[Arc - activity regulated cytoskeletal-associated protein, Atp1b2 - atpase, na+/k+ transporting, beta 2 polypeptide, Gal - galanin, Atp1b1 - atpase, na+/k+ transporting, beta 1 polypeptide, Ednra - endothelin receptor type a, Kcnc2 - potassium voltage gated channel, shaw-related subfamily, member 2, Abcc8 - atp-binding cassette, sub-family c (cftr/mrp), member 8, Dmd - dystrophin, muscular dystro…
	GO:0008217	regulation of blood pressure	1.2e-05	2.9	176	21	[Cyp4f18 - cytochrome p450, family 4, subfamily f, polypeptide 18, Ar - androgen receptor, Npr3 - natriuretic peptide receptor 3, Ptgs1 - prostaglandin-endoperoxide synthase 1, Npy1r - neuropeptide y receptor y1, Tacr1 - tachykinin receptor 1, Vegfc - vascular endothelial growth factor c, Agtr1a - angiotensin ii receptor, type 1a, Hsd11b2 - hydroxysteroid 11-beta dehydrogenase 2, Lep - leptin, Ca…
	GO:0050905	neuromuscular process	0.000534	2.9	109	13	[Atp2b2 - atpase, ca++ transporting, plasma membrane 2, Penk - preproenkephalin, Hoxc10 - homeobox c10, Fabp7 - fatty acid binding protein 7, brain, Hoxa1 - homeobox a1, Tcf15 - transcription factor 15, Csmd1 - cub and sushi multiple domains 1, Clrn1 - clarin 1, Uchl1 - ubiquitin carboxy-terminal hydrolase l1, Grin2d - glutamate receptor, ionotropic, nmda2d (epsilon 4), Grin2a - glutamate recepto…
	GO:1903034	regulation of response to wounding	3.59e-05	2.87	161	19	[Alox12 - arachidonate 12-lipoxygenase, Klk8 - kallikrein related-peptidase 8, Pdgfb - platelet derived growth factor, b polypeptide, Abcc8 - atp-binding cassette, sub-family c (cftr/mrp), member 8, S100a9 - s100 calcium binding protein a9 (calgranulin b), Ptprj - protein tyrosine phosphatase, receptor type, j, Cd34 - cd34 antigen, Acta2 - actin, alpha 2, smooth muscle, aorta, Hbegf - heparin-bin…
	GO:0007613	memory	0.000164	2.84	137	16	[Arc - activity regulated cytoskeletal-associated protein, Htr2a - 5-hydroxytryptamine (serotonin) receptor 2a, Klk8 - kallikrein related-peptidase 8, Ptgs1 - prostaglandin-endoperoxide synthase 1, Map1a - microtubule-associated protein 1 a, Tacr1 - tachykinin receptor 1, Ntrk2 - neurotrophic tyrosine kinase, receptor, type 2, Abcc8 - atp-binding cassette, sub-family c (cftr/mrp), member 8, Drd1a…
	GO:0001775	cell activation	5.76e-13	2.83	507	59	[Apbb1ip - amyloid beta (a4) precursor protein-binding, family b, member 1 interacting protein, Il15 - interleukin 15, Ikzf1 - ikaros family zinc finger 1, Cd48 - cd48 antigen, Ikzf3 - ikaros family zinc finger 3, Jag2 - jagged 2, Cd3g - cd3 antigen, gamma polypeptide, Cd3e - cd3 antigen, epsilon polypeptide, Cd3d - cd3 antigen, delta polypeptide, Il18rap - interleukin 18 receptor accessory prote…
	GO:0050730	regulation of peptidyl-tyrosine phosphorylation	4.67e-07	2.83	249	29	[Pdgfd - platelet-derived growth factor, d polypeptide, Fgfr3 - fibroblast growth factor receptor 3, Il15 - interleukin 15, Areg - amphiregulin, Vegfc - vascular endothelial growth factor c, Cd3e - cd3 antigen, epsilon polypeptide, Il31ra - interleukin 31 receptor a, Fcer1a - fc receptor, ige, high affinity i, alpha polypeptide, Cck - cholecystokinin, Ptk6 - ptk6 protein tyrosine kinase 6, Il22ra…
	GO:0035239	tube morphogenesis	2.32e-08	2.82	311	36	[Fgfr3 - fibroblast growth factor receptor 3, Mycn - v-myc myelocytomatosis viral related oncogene, neuroblastoma derived (avian), Hoxa1 - homeobox a1, Ednra - endothelin receptor type a, Areg - amphiregulin, Col4a1 - collagen, type iv, alpha 1, Cxcl12 - chemokine (c-x-c motif) ligand 12, Tbx3 - t-box 3, Tbx2 - t-box 2, Gli3 - gli-kruppel family member gli3, Prrx1 - paired related homeobox 1, Rdh…
	GO:0031341	regulation of cell killing	0.000453	2.81	121	14	[Il7r - interleukin 7 receptor, Ptprc - protein tyrosine phosphatase, receptor type, c, Sh2d1a - sh2 domain protein 1a, H2-M2 - histocompatibility 2, m region locus 2, Il18rap - interleukin 18 receptor accessory protein, Stap1 - signal transducing adaptor family member 1, Pglyrp1 - peptidoglycan recognition protein 1, Cadm1 - cell adhesion molecule 1, Lep - leptin, Cxcl5 - chemokine (c-x-c motif)…
	GO:0002703	regulation of leukocyte mediated immunity	1.5e-06	2.8	235	27	[Cd96 - cd96 antigen, Il1r1 - interleukin 1 receptor, type i, Il18rap - interleukin 18 receptor accessory protein, Fgr - gardner-rasheed feline sarcoma viral (fgr) oncogene homolog, Cadm1 - cell adhesion molecule 1, Fcer1a - fc receptor, ige, high affinity i, alpha polypeptide, Lta - lymphotoxin a, Cxcl5 - chemokine (c-x-c motif) ligand 5, Cd84 - cd84 antigen, Slamf1 - signaling lymphocytic activ…
	GO:0050920	regulation of chemotaxis	8.68e-06	2.8	200	23	[Pdgfd - platelet-derived growth factor, d polypeptide, St6gal1 - beta galactoside alpha 2,6 sialyltransferase 1, Gpr18 - g protein-coupled receptor 18, Ednra - endothelin receptor type a, Vegfc - vascular endothelial growth factor c, Ccr6 - chemokine (c-c motif) receptor 6, Pdgfb - platelet derived growth factor, b polypeptide, Snai2 - snail homolog 2 (drosophila), Stap1 - signal transducing ada…
	GO:0050680	negative regulation of epithelial cell proliferation	0.000194	2.8	139	16	[Sulf1 - sulfatase 1, Fgfr3 - fibroblast growth factor receptor 3, Ar - androgen receptor, Runx3 - runt related transcription factor 3, Atoh8 - atonal homolog 8 (drosophila), Marveld3 - marvel (membrane-associating) domain containing 3, Snai2 - snail homolog 2 (drosophila), Vash1 - vasohibin 1, Dlk1 - delta-like 1 homolog (drosophila), Gkn3 - gastrokine 3, Flt1 - fms-like tyrosine kinase 1, Eppk1…
	GO:0002708	positive regulation of lymphocyte mediated immunity	0.000194	2.8	139	16	[Foxp3 - forkhead box p3, Sh2d1a - sh2 domain protein 1a, Ptprc - protein tyrosine phosphatase, receptor type, c, H2-M2 - histocompatibility 2, m region locus 2, Il1r1 - interleukin 1 receptor, type i, Il18rap - interleukin 18 receptor accessory protein, Cadm1 - cell adhesion molecule 1, Fcer1a - fc receptor, ige, high affinity i, alpha polypeptide, Lta - lymphotoxin a, Slamf6 - slam family membe…
	GO:1903708	positive regulation of hemopoiesis	1.02e-05	2.77	202	23	[Il15 - interleukin 15, Il7r - interleukin 7 receptor, Foxp3 - forkhead box p3, Ikzf1 - ikaros family zinc finger 1, Runx3 - runt related transcription factor 3, H2-Aa - histocompatibility 2, class ii antigen a, alpha, Ptprc - protein tyrosine phosphatase, receptor type, c, Prdm1 - pr domain containing 1, with znf domain, Lep - leptin, Tesc - tescalcin, Hlx - h2.0-like homeobox, Cd83 - cd83 antig…
	GO:0002698	negative regulation of immune effector process	0.000581	2.75	124	14	[Il7r - interleukin 7 receptor, Foxp3 - forkhead box p3, Ptprc - protein tyrosine phosphatase, receptor type, c, Cd96 - cd96 antigen, Pglyrp1 - peptidoglycan recognition protein 1, Tnfsf18 - tumor necrosis factor (ligand) superfamily, member 18, Smad7 - smad family member 7, Hlx - h2.0-like homeobox, Cd84 - cd84 antigen, Il2ra - interleukin 2 receptor, alpha chain, Slamf1 - signaling lymphocytic …
	GO:0048660	regulation of smooth muscle cell proliferation	0.000116	2.72	161	18	[Pdgfd - platelet-derived growth factor, d polypeptide, Il15 - interleukin 15, Alox12 - arachidonate 12-lipoxygenase, Npr3 - natriuretic peptide receptor 3, Fgf9 - fibroblast growth factor 9, P2ry6 - pyrimidinergic receptor p2y, g-protein coupled, 6, Tacr1 - tachykinin receptor 1, Pdgfb - platelet derived growth factor, b polypeptide, Elane - elastase, neutrophil expressed, Pdgfrb - platelet deri…
	GO:0007169	transmembrane receptor protein tyrosine kinase signaling pathway	4.72e-08	2.7	334	37	[Sulf1 - sulfatase 1, Fgfr3 - fibroblast growth factor receptor 3, Pdgfd - platelet-derived growth factor, d polypeptide, Fgf9 - fibroblast growth factor 9, Areg - amphiregulin, Vegfc - vascular endothelial growth factor c, Ntrk2 - neurotrophic tyrosine kinase, receptor, type 2, Col4a2 - collagen, type iv, alpha 2, Fgr - gardner-rasheed feline sarcoma viral (fgr) oncogene homolog, Col4a1 - collag…
	GO:0001568	blood vessel development	0.000125	2.7	162	18	[Hoxa1 - homeobox a1, Prdm1 - pr domain containing 1, with znf domain, Cited2 - cbp/p300-interacting transactivator, with glu/asp-rich carboxy-terminal domain, 2, Agtr1a - angiotensin ii receptor, type 1a, Pdgfb - platelet derived growth factor, b polypeptide, Sox17 - sry-box containing gene 17, Hey2 - hairy/enhancer-of-split related with yrpw motif 2, Fzd4 - frizzled homolog 4 (drosophila), Smad…
	GO:0050777	negative regulation of immune response	0.000316	2.68	145	16	[Gpr17 - g protein-coupled receptor 17, Il7r - interleukin 7 receptor, Foxp3 - forkhead box p3, Ptprc - protein tyrosine phosphatase, receptor type, c, Cd96 - cd96 antigen, Pglyrp1 - peptidoglycan recognition protein 1, Tnfsf18 - tumor necrosis factor (ligand) superfamily, member 18, Smad7 - smad family member 7, Nlrp6 - nlr family, pyrin domain containing 6, Hlx - h2.0-like homeobox, Cd84 - cd84…
	GO:0002824	positive regulation of adaptive immune response based on somatic recombination of immune receptors built from immunoglobulin superfamily domains	0.000483	2.68	136	15	[Foxp3 - forkhead box p3, Ptprc - protein tyrosine phosphatase, receptor type, c, Il1r1 - interleukin 1 receptor, type i, H2-M2 - histocompatibility 2, m region locus 2, Fcer1a - fc receptor, ige, high affinity i, alpha polypeptide, Lta - lymphotoxin a, Il18r1 - interleukin 18 receptor 1, Hlx - h2.0-like homeobox, Btk - bruton agammaglobulinemia tyrosine kinase, Cd28 - cd28 antigen, Sash3 - sam a…
	GO:0002705	positive regulation of leukocyte mediated immunity	0.000146	2.67	164	18	[Foxp3 - forkhead box p3, Sh2d1a - sh2 domain protein 1a, Ptprc - protein tyrosine phosphatase, receptor type, c, H2-M2 - histocompatibility 2, m region locus 2, Il1r1 - interleukin 1 receptor, type i, Il18rap - interleukin 18 receptor accessory protein, Fgr - gardner-rasheed feline sarcoma viral (fgr) oncogene homolog, Cadm1 - cell adhesion molecule 1, Fcer1a - fc receptor, ige, high affinity i,…
	GO:0042445	hormone metabolic process	0.000223	2.67	155	17	[Cyp11a1 - cytochrome p450, family 11, subfamily a, polypeptide 1, Rdh10 - retinol dehydrogenase 10 (all-trans), Nr5a1 - nuclear receptor subfamily 5, group a, member 1, Slc5a5 - solute carrier family 5 (sodium iodide symporter), member 5, Pcsk1 - proprotein convertase subtilisin/kexin type 1, Hsd11b2 - hydroxysteroid 11-beta dehydrogenase 2, Plb1 - phospholipase b1, Lep - leptin, Adh7 - alcohol …
	GO:1902105	regulation of leukocyte differentiation	7.91e-07	2.66	284	31	[Fgfr3 - fibroblast growth factor receptor 3, Il15 - interleukin 15, Runx3 - runt related transcription factor 3, Ikzf1 - ikaros family zinc finger 1, Ikzf3 - ikaros family zinc finger 3, Clec2i - c-type lectin domain family 2, member i, Hlx - h2.0-like homeobox, Cd83 - cd83 antigen, Ccl3 - chemokine (c-c motif) ligand 3, Nckap1l - nck associated protein 1 like, Il1rl2 - interleukin 1 receptor-li…
	GO:0050864	regulation of B cell activation	0.000799	2.66	128	14	[Ikzf1 - ikaros family zinc finger 1, Foxp3 - forkhead box p3, Ikzf3 - ikaros family zinc finger 3, Ptprc - protein tyrosine phosphatase, receptor type, c, Tbc1d10c - tbc1 domain family, member 10c, Prdm1 - pr domain containing 1, with znf domain, Cd28 - cd28 antigen, Btk - bruton agammaglobulinemia tyrosine kinase, Sash3 - sam and sh3 domain containing 3, Nckap1l - nck associated protein 1 like,…
	GO:0051251	positive regulation of lymphocyte activation	2.99e-06	2.64	258	28	[Rasal3 - ras protein activator like 3, Il15 - interleukin 15, Runx3 - runt related transcription factor 3, Ikzf1 - ikaros family zinc finger 1, Cd3e - cd3 antigen, epsilon polypeptide, Clec2i - c-type lectin domain family 2, member i, Cd83 - cd83 antigen, Hlx - h2.0-like homeobox, Slamf1 - signaling lymphocytic activation molecule family member 1, Nckap1l - nck associated protein 1 like, Il1rl2 …
	GO:0008016	regulation of heart contraction	0.000171	2.64	166	18	[Atp1b1 - atpase, na+/k+ transporting, beta 1 polypeptide, Hey2 - hairy/enhancer-of-split related with yrpw motif 2, Hcn4 - hyperpolarization-activated, cyclic nucleotide-gated k+ 4, Dmd - dystrophin, muscular dystrophy, Akap6 - a kinase (prka) anchor protein 6, Cacna1c - calcium channel, voltage-dependent, l type, alpha 1c subunit, Apln - apelin, Smad7 - smad family member 7, Dsp - desmoplakin, …
	GO:0002696	positive regulation of leukocyte activation	4.3e-07	2.63	305	33	[Rasal3 - ras protein activator like 3, Il15 - interleukin 15, Runx3 - runt related transcription factor 3, Ikzf1 - ikaros family zinc finger 1, Hamp - hepcidin antimicrobial peptide, Cd3e - cd3 antigen, epsilon polypeptide, Fgr - gardner-rasheed feline sarcoma viral (fgr) oncogene homolog, Clec2i - c-type lectin domain family 2, member i, Tlr6 - toll-like receptor 6, Fcer1a - fc receptor, ige, h…
	GO:0042113	B cell activation	0.000281	2.62	158	17	[Tshr - thyroid stimulating hormone receptor, Gapt - grb2-binding adaptor, transmembrane, Il7r - interleukin 7 receptor, Ikzf1 - ikaros family zinc finger 1, Ikzf3 - ikaros family zinc finger 3, Ptprc - protein tyrosine phosphatase, receptor type, c, Ccr6 - chemokine (c-c motif) receptor 6, Kit - kit oncogene, Ifnk - interferon kappa, Cd180 - cd180 antigen, Fcrl1 - fc receptor-like 1, Pou2f2 - po…
	GO:0048754	branching morphogenesis of an epithelial tube	0.000463	2.6	150	16	[Rdh10 - retinol dehydrogenase 10 (all-trans), Mycn - v-myc myelocytomatosis viral related oncogene, neuroblastoma derived (avian), Ccl11 - chemokine (c-c motif) ligand 11, Areg - amphiregulin, Ednra - endothelin receptor type a, Col4a1 - collagen, type iv, alpha 1, Nrarp - notch-regulated ankyrin repeat protein, Notch4 - notch 4, Mgp - matrix gla protein, Flt1 - fms-like tyrosine kinase 1, Foxa1…
	GO:0006874	cellular calcium ion homeostasis	5.94e-09	2.59	423	45	[Gpr17 - g protein-coupled receptor 17, Atp2b2 - atpase, ca++ transporting, plasma membrane 2, Gpr18 - g protein-coupled receptor 18, Atp1b1 - atpase, na+/k+ transporting, beta 1 polypeptide, Gpr65 - g-protein coupled receptor 65, Ednra - endothelin receptor type a, Lpar6 - lysophosphatidic acid receptor 6, Agtr1a - angiotensin ii receptor, type 1a, P2ry10 - purinergic receptor p2y, g-protein cou…
	GO:0050865	regulation of cell activation	1.11e-10	2.57	531	56	[Rasal3 - ras protein activator like 3, Il15 - interleukin 15, Ikzf1 - ikaros family zinc finger 1, Tbc1d10c - tbc1 domain family, member 10c, Ikzf3 - ikaros family zinc finger 3, Hamp - hepcidin antimicrobial peptide, Cd3e - cd3 antigen, epsilon polypeptide, Clec2i - c-type lectin domain family 2, member i, Tlr6 - toll-like receptor 6, Fcer1a - fc receptor, ige, high affinity i, alpha polypeptid…
	GO:0045165	cell fate commitment	0.000175	2.55	181	19	[Fgfr3 - fibroblast growth factor receptor 3, Foxp3 - forkhead box p3, Foxn4 - forkhead box n4, Bcl11b - b cell leukemia/lymphoma 11b, Jag2 - jagged 2, Prdm1 - pr domain containing 1, with znf domain, Mir450b - microrna 450b, Hey2 - hairy/enhancer-of-split related with yrpw motif 2, Tlx1 - t cell leukemia, homeobox 1, Ly9 - lymphocyte antigen 9, Notch3 - notch 3, Slamf6 - slam family member 6, Lh…
	GO:0006937	regulation of muscle contraction	0.000819	2.55	143	15	[Ptgs1 - prostaglandin-endoperoxide synthase 1, Atp1b1 - atpase, na+/k+ transporting, beta 1 polypeptide, Tacr1 - tachykinin receptor 1, Kit - kit oncogene, Hcn4 - hyperpolarization-activated, cyclic nucleotide-gated k+ 4, Dmd - dystrophin, muscular dystrophy, Akap6 - a kinase (prka) anchor protein 6, Cacna1c - calcium channel, voltage-dependent, l type, alpha 1c subunit, Smad7 - smad family memb…
	GO:0002822	regulation of adaptive immune response based on somatic recombination of immune receptors built from immunoglobulin superfamily domains	0.000202	2.53	183	19	[Il7r - interleukin 7 receptor, Foxp3 - forkhead box p3, Ptprc - protein tyrosine phosphatase, receptor type, c, H2-M2 - histocompatibility 2, m region locus 2, Il1r1 - interleukin 1 receptor, type i, Tnfsf18 - tumor necrosis factor (ligand) superfamily, member 18, Smad7 - smad family member 7, Fcer1a - fc receptor, ige, high affinity i, alpha polypeptide, Lta - lymphotoxin a, Il18r1 - interleuki…
	GO:0001763	morphogenesis of a branching structure	0.000202	2.53	183	19	[Col13a1 - collagen, type xiii, alpha 1, Rdh10 - retinol dehydrogenase 10 (all-trans), Mycn - v-myc myelocytomatosis viral related oncogene, neuroblastoma derived (avian), Ccl11 - chemokine (c-c motif) ligand 11, Ednra - endothelin receptor type a, Areg - amphiregulin, Prdm1 - pr domain containing 1, with znf domain, Pdgfb - platelet derived growth factor, b polypeptide, Col4a1 - collagen, type i…
	GO:1904018	positive regulation of vasculature development	0.000164	2.5	195	20	[Pdgfd - platelet-derived growth factor, d polypeptide, Anxa3 - annexin a3, Ccl11 - chemokine (c-c motif) ligand 11, Vegfc - vascular endothelial growth factor c, Agtr1a - angiotensin ii receptor, type 1a, Cybb - cytochrome b-245, beta polypeptide, Pdgfb - platelet derived growth factor, b polypeptide, Kit - kit oncogene, Cd34 - cd34 antigen, Notch4 - notch 4, Hspb1 - heat shock protein 1, Ecm1 -…
	GO:0051272	positive regulation of cellular component movement	7.42e-10	2.49	528	54	[Pdgfd - platelet-derived growth factor, d polypeptide, Fez1 - fasciculation and elongation protein zeta 1 (zygin i), Il1r1 - interleukin 1 receptor, type i, Elane - elastase, neutrophil expressed, Drd1a - dopamine receptor d1a, P2ry2 - purinergic receptor p2y, g-protein coupled 2, Gcnt2 - glucosaminyl (n-acetyl) transferase 2, i-branching enzyme, Hspb1 - heat shock protein 1, Mcam - melanoma cel…
	GO:0055074	calcium ion homeostasis	1.98e-08	2.49	440	45	[Gpr17 - g protein-coupled receptor 17, Atp2b2 - atpase, ca++ transporting, plasma membrane 2, Gpr18 - g protein-coupled receptor 18, Atp1b1 - atpase, na+/k+ transporting, beta 1 polypeptide, Gpr65 - g-protein coupled receptor 65, Ednra - endothelin receptor type a, Lpar6 - lysophosphatidic acid receptor 6, Agtr1a - angiotensin ii receptor, type 1a, P2ry10 - purinergic receptor p2y, g-protein cou…
	GO:0032101	regulation of response to external stimulus	1.69e-12	2.48	697	71	[Pdgfd - platelet-derived growth factor, d polypeptide, Mgll - monoglyceride lipase, Il15 - interleukin 15, Adamts12 - a disintegrin-like and metallopeptidase (reprolysin type) with thrombospondin type 1 motif, 12, Hamp - hepcidin antimicrobial peptide, Il1r1 - interleukin 1 receptor, type i, Abcc8 - atp-binding cassette, sub-family c (cftr/mrp), member 8, Nt5e - 5' nucleotidase, ecto, Tlr6 - tol…
	GO:0072503	cellular divalent inorganic cation homeostasis	2.42e-08	2.47	443	45	[Gpr17 - g protein-coupled receptor 17, Atp2b2 - atpase, ca++ transporting, plasma membrane 2, Gpr18 - g protein-coupled receptor 18, Atp1b1 - atpase, na+/k+ transporting, beta 1 polypeptide, Gpr65 - g-protein coupled receptor 65, Ednra - endothelin receptor type a, Lpar6 - lysophosphatidic acid receptor 6, Agtr1a - angiotensin ii receptor, type 1a, P2ry10 - purinergic receptor p2y, g-protein cou…
	GO:0046777	protein autophosphorylation	0.000201	2.46	198	20	[Fgfr3 - fibroblast growth factor receptor 3, Sla - src-like adaptor, Ntrk2 - neurotrophic tyrosine kinase, receptor, type 2, Kit - kit oncogene, Fgr - gardner-rasheed feline sarcoma viral (fgr) oncogene homolog, Insr - insulin receptor, Stk10 - serine/threonine kinase 10, Pdgfrb - platelet derived growth factor receptor, beta polypeptide, Hck - hemopoietic cell kinase, Itk - il2 inducible t cell…
	GO:0046578	regulation of Ras protein signal transduction	0.000152	2.44	209	21	[Rasal3 - ras protein activator like 3, Eps8l2 - eps8-like 2, Gpr17 - g protein-coupled receptor 17, Gpr18 - g protein-coupled receptor 18, Fgd3 - fyve, rhogef and ph domain containing 3, Gpr65 - g-protein coupled receptor 65, Plekhg6 - pleckstrin homology domain containing, family g (with rhogef domain) member 6, Dock2 - dedicator of cyto-kinesis 2, Lpar6 - lysophosphatidic acid receptor 6, P2ry…
	GO:0002684	positive regulation of immune system process	5.83e-14	2.43	831	83	[Pdgfd - platelet-derived growth factor, d polypeptide, Spon2 - spondin 2, extracellular matrix protein, Rasal3 - ras protein activator like 3, Il15 - interleukin 15, Ikzf1 - ikaros family zinc finger 1, Hamp - hepcidin antimicrobial peptide, Cd3e - cd3 antigen, epsilon polypeptide, Il1r1 - interleukin 1 receptor, type i, Il18rap - interleukin 18 receptor accessory protein, Elane - elastase, neut…
	GO:0002694	regulation of leukocyte activation	1.02e-08	2.43	491	49	[Rasal3 - ras protein activator like 3, Il15 - interleukin 15, Ikzf1 - ikaros family zinc finger 1, Ikzf3 - ikaros family zinc finger 3, Hamp - hepcidin antimicrobial peptide, Tbc1d10c - tbc1 domain family, member 10c, Cd3e - cd3 antigen, epsilon polypeptide, Clec2i - c-type lectin domain family 2, member i, Tlr6 - toll-like receptor 6, Fcer1a - fc receptor, ige, high affinity i, alpha polypeptid…
	GO:2000147	positive regulation of cell motility	5.43e-09	2.42	512	51	[Pdgfd - platelet-derived growth factor, d polypeptide, Il1r1 - interleukin 1 receptor, type i, Elane - elastase, neutrophil expressed, Drd1a - dopamine receptor d1a, Gcnt2 - glucosaminyl (n-acetyl) transferase 2, i-branching enzyme, P2ry2 - purinergic receptor p2y, g-protein coupled 2, Mcam - melanoma cell adhesion molecule, Hspb1 - heat shock protein 1, Retn - resistin, Hdac9 - histone deacetyl…
	GO:0061138	morphogenesis of a branching epithelium	0.000803	2.39	173	17	[Rdh10 - retinol dehydrogenase 10 (all-trans), Mycn - v-myc myelocytomatosis viral related oncogene, neuroblastoma derived (avian), Ccl11 - chemokine (c-c motif) ligand 11, Areg - amphiregulin, Ednra - endothelin receptor type a, Pdgfb - platelet derived growth factor, b polypeptide, Col4a1 - collagen, type iv, alpha 1, Nrarp - notch-regulated ankyrin repeat protein, Notch4 - notch 4, Mgp - matri…
	GO:0001525	angiogenesis	4.2e-05	2.38	266	26	[Fgf9 - fibroblast growth factor 9, Vegfc - vascular endothelial growth factor c, Col4a2 - collagen, type iv, alpha 2, Col4a1 - collagen, type iv, alpha 1, Apln - apelin, Mcam - melanoma cell adhesion molecule, Vash1 - vasohibin 1, Ecm1 - extracellular matrix protein 1, Gpr56 - g protein-coupled receptor 56, Ace - angiotensin i converting enzyme (peptidyl-dipeptidase a) 1, Cx3cl1 - chemokine (c-x…
	GO:0090066	regulation of anatomical structure size	1.19e-07	2.37	452	44	[Eps8l2 - eps8-like 2, Atp2b2 - atpase, ca++ transporting, plasma membrane 2, Mgll - monoglyceride lipase, Ptgs1 - prostaglandin-endoperoxide synthase 1, Ednra - endothelin receptor type a, Agtr1a - angiotensin ii receptor, type 1a, Slc12a8 - solute carrier family 12 (potassium/chloride transporters), member 8, Slc12a5 - solute carrier family 12, member 5, Ret - ret proto-oncogene, Clec2i - c-typ…
	GO:0010959	regulation of metal ion transport	6.76e-07	2.36	402	39	[Atp2b2 - atpase, ca++ transporting, plasma membrane 2, Tmc1 - transmembrane channel-like gene family 1, Gal - galanin, Atp1b2 - atpase, na+/k+ transporting, beta 2 polypeptide, Hamp - hepcidin antimicrobial peptide, Tspan13 - tetraspanin 13, Atp1b1 - atpase, na+/k+ transporting, beta 1 polypeptide, Ednra - endothelin receptor type a, Kcnc2 - potassium voltage gated channel, shaw-related subfamil…
	GO:0051924	regulation of calcium ion transport	6.75e-05	2.36	258	25	[Atp2b2 - atpase, ca++ transporting, plasma membrane 2, Tmc1 - transmembrane channel-like gene family 1, Tspan13 - tetraspanin 13, Atp1b1 - atpase, na+/k+ transporting, beta 1 polypeptide, Ednra - endothelin receptor type a, Dmd - dystrophin, muscular dystrophy, Drd1a - dopamine receptor d1a, Akap5 - a kinase (prka) anchor protein 5, Cd84 - cd84 antigen, Adcyap1r1 - adenylate cyclase activating p…
	GO:0016477	cell migration	3.64e-12	2.35	786	76	[Arc - activity regulated cytoskeletal-associated protein, Pik3c2b - phosphoinositide-3-kinase, class 2, beta polypeptide, Adamts12 - a disintegrin-like and metallopeptidase (reprolysin type) with thrombospondin type 1 motif, 12, Emp2 - epithelial membrane protein 2, Agtr1a - angiotensin ii receptor, type 1a, Ntrk2 - neurotrophic tyrosine kinase, receptor, type 2, Cxcl11 - chemokine (c-x-c motif)…
	GO:0030334	regulation of cell migration	1.7e-12	2.34	821	79	[Sulf1 - sulfatase 1, Pdgfd - platelet-derived growth factor, d polypeptide, Arhgap4 - rho gtpase activating protein 4, Emp2 - epithelial membrane protein 2, Il1r1 - interleukin 1 receptor, type i, Abcc8 - atp-binding cassette, sub-family c (cftr/mrp), member 8, Elane - elastase, neutrophil expressed, Drd1a - dopamine receptor d1a, P2ry2 - purinergic receptor p2y, g-protein coupled 2, Gcnt2 - glu…
	GO:0043269	regulation of ion transport	1.93e-10	2.34	677	65	[Arc - activity regulated cytoskeletal-associated protein, Hamp - hepcidin antimicrobial peptide, Tspan13 - tetraspanin 13, Syt7 - synaptotagmin vii, Kcnc2 - potassium voltage gated channel, shaw-related subfamily, member 2, Tmem37 - transmembrane protein 37, Abcc8 - atp-binding cassette, sub-family c (cftr/mrp), member 8, Entpd1 - ectonucleoside triphosphate diphosphohydrolase 1, Drd1a - dopamin…
	GO:0051056	regulation of small GTPase mediated signal transduction	0.000144	2.34	239	23	[Gpr17 - g protein-coupled receptor 17, Rasal3 - ras protein activator like 3, Eps8l2 - eps8-like 2, Gpr18 - g protein-coupled receptor 18, Fgd3 - fyve, rhogef and ph domain containing 3, Gpr65 - g-protein coupled receptor 65, Plekhg6 - pleckstrin homology domain containing, family g (with rhogef domain) member 6, Dock2 - dedicator of cyto-kinesis 2, Lpar6 - lysophosphatidic acid receptor 6, P2ry…
	GO:0002682	regulation of immune system process	3.21e-18	2.33	1245	119	[Rasal3 - ras protein activator like 3, Ikzf1 - ikaros family zinc finger 1, Ikzf3 - ikaros family zinc finger 3, Elane - elastase, neutrophil expressed, H2-Ob - histocompatibility 2, o region beta locus, Fcer1a - fc receptor, ige, high affinity i, alpha polypeptide, Nlrp6 - nlr family, pyrin domain containing 6, Pde5a - phosphodiesterase 5a, cgmp-specific, Ace - angiotensin i converting enzyme (…
	GO:0030003	cellular cation homeostasis	3.81e-09	2.33	584	56	[Hamp - hepcidin antimicrobial peptide, Gpr65 - g-protein coupled receptor 65, Agtr1a - angiotensin ii receptor, type 1a, Slc12a5 - solute carrier family 12, member 5, P2ry10 - purinergic receptor p2y, g-protein coupled 10, Drd1a - dopamine receptor d1a, P2ry2 - purinergic receptor p2y, g-protein coupled 2, Slamf8 - slam family member 8, Car2 - carbonic anhydrase 2, Ptgdr - prostaglandin d recept…
	GO:0072507	divalent inorganic cation homeostasis	1.3e-07	2.33	469	45	[Gpr17 - g protein-coupled receptor 17, Atp2b2 - atpase, ca++ transporting, plasma membrane 2, Gpr18 - g protein-coupled receptor 18, Atp1b1 - atpase, na+/k+ transporting, beta 1 polypeptide, Gpr65 - g-protein coupled receptor 65, Ednra - endothelin receptor type a, Lpar6 - lysophosphatidic acid receptor 6, Agtr1a - angiotensin ii receptor, type 1a, P2ry10 - purinergic receptor p2y, g-protein cou…
	GO:0050776	regulation of immune response	1.46e-10	2.32	704	67	[Spon2 - spondin 2, extracellular matrix protein, Il15 - interleukin 15, Cd48 - cd48 antigen, Cd96 - cd96 antigen, Cd3e - cd3 antigen, epsilon polypeptide, Il1r1 - interleukin 1 receptor, type i, Il18rap - interleukin 18 receptor accessory protein, Elane - elastase, neutrophil expressed, Clec2i - c-type lectin domain family 2, member i, Tlr6 - toll-like receptor 6, Fcer1a - fc receptor, ige, high…
	GO:0040011	locomotion	6.8e-14	2.31	959	91	[Arc - activity regulated cytoskeletal-associated protein, Pik3c2b - phosphoinositide-3-kinase, class 2, beta polypeptide, Adamts12 - a disintegrin-like and metallopeptidase (reprolysin type) with thrombospondin type 1 motif, 12, Emp2 - epithelial membrane protein 2, Agtr1a - angiotensin ii receptor, type 1a, Ntrk2 - neurotrophic tyrosine kinase, receptor, type 2, Cxcl11 - chemokine (c-x-c motif)…
	GO:0002683	negative regulation of immune system process	4.42e-07	2.31	442	42	[Gpr17 - g protein-coupled receptor 17, Runx3 - runt related transcription factor 3, Tbc1d10c - tbc1 domain family, member 10c, Gal - galanin, Gpr18 - g protein-coupled receptor 18, Cd96 - cd96 antigen, Clec2i - c-type lectin domain family 2, member i, Tlr6 - toll-like receptor 6, H2-Ob - histocompatibility 2, o region beta locus, Zc3h12d - zinc finger ccch type containing 12d, Nlrp6 - nlr family…
	GO:0051270	regulation of cellular component movement	2.02e-13	2.29	945	89	[Sulf1 - sulfatase 1, Pdgfd - platelet-derived growth factor, d polypeptide, Arhgap4 - rho gtpase activating protein 4, Emp2 - epithelial membrane protein 2, Fez1 - fasciculation and elongation protein zeta 1 (zygin i), Il1r1 - interleukin 1 receptor, type i, Abcc8 - atp-binding cassette, sub-family c (cftr/mrp), member 8, Elane - elastase, neutrophil expressed, Drd1a - dopamine receptor d1a, P2r…
	GO:0006873	cellular ion homeostasis	8.85e-09	2.28	598	56	[Hamp - hepcidin antimicrobial peptide, Gpr65 - g-protein coupled receptor 65, Agtr1a - angiotensin ii receptor, type 1a, Slc12a5 - solute carrier family 12, member 5, P2ry10 - purinergic receptor p2y, g-protein coupled 10, Drd1a - dopamine receptor d1a, P2ry2 - purinergic receptor p2y, g-protein coupled 2, Slamf8 - slam family member 8, Car2 - carbonic anhydrase 2, Ptgdr - prostaglandin d recept…
	GO:0040017	positive regulation of locomotion	3.98e-08	2.28	544	51	[Pdgfd - platelet-derived growth factor, d polypeptide, Il1r1 - interleukin 1 receptor, type i, Elane - elastase, neutrophil expressed, Drd1a - dopamine receptor d1a, Gcnt2 - glucosaminyl (n-acetyl) transferase 2, i-branching enzyme, P2ry2 - purinergic receptor p2y, g-protein coupled 2, Mcam - melanoma cell adhesion molecule, Hspb1 - heat shock protein 1, Retn - resistin, Hdac9 - histone deacetyl…
	GO:0034765	regulation of ion transmembrane transport	7.12e-07	2.27	450	42	[Arc - activity regulated cytoskeletal-associated protein, Tmc1 - transmembrane channel-like gene family 1, Kcnq4 - potassium voltage-gated channel, subfamily q, member 4, Gal - galanin, Hamp - hepcidin antimicrobial peptide, Atp1b2 - atpase, na+/k+ transporting, beta 2 polypeptide, Tspan13 - tetraspanin 13, Atp1b1 - atpase, na+/k+ transporting, beta 1 polypeptide, Fam115c - family with sequence …
	GO:0032412	regulation of ion transmembrane transporter activity	0.000312	2.27	236	22	[Gstm7 - glutathione s-transferase, mu 7, Arc - activity regulated cytoskeletal-associated protein, Lrrc55 - leucine rich repeat containing 55, Stac2 - sh3 and cysteine rich domain 2, Gal - galanin, Atp1b2 - atpase, na+/k+ transporting, beta 2 polypeptide, Atp1b1 - atpase, na+/k+ transporting, beta 1 polypeptide, Fam115c - family with sequence similarity 115, member c, Kcnc2 - potassium voltage g…
	GO:0055080	cation homeostasis	1.74e-09	2.26	666	62	[Hamp - hepcidin antimicrobial peptide, Gpr65 - g-protein coupled receptor 65, Agtr1a - angiotensin ii receptor, type 1a, Slc12a5 - solute carrier family 12, member 5, P2ry10 - purinergic receptor p2y, g-protein coupled 10, Drd1a - dopamine receptor d1a, P2ry2 - purinergic receptor p2y, g-protein coupled 2, Slamf8 - slam family member 8, Car2 - carbonic anhydrase 2, Ptgdr - prostaglandin d recept…
	GO:2000145	regulation of cell motility	9.18e-12	2.25	865	80	[Sulf1 - sulfatase 1, Pdgfd - platelet-derived growth factor, d polypeptide, Arhgap4 - rho gtpase activating protein 4, Emp2 - epithelial membrane protein 2, Il1r1 - interleukin 1 receptor, type i, Abcc8 - atp-binding cassette, sub-family c (cftr/mrp), member 8, Elane - elastase, neutrophil expressed, Drd1a - dopamine receptor d1a, P2ry2 - purinergic receptor p2y, g-protein coupled 2, Gcnt2 - glu…
	GO:0006875	cellular metal ion homeostasis	1.6e-07	2.25	520	48	[Gpr17 - g protein-coupled receptor 17, Atp2b2 - atpase, ca++ transporting, plasma membrane 2, Gpr18 - g protein-coupled receptor 18, Hamp - hepcidin antimicrobial peptide, Atp1b2 - atpase, na+/k+ transporting, beta 2 polypeptide, Atp1b1 - atpase, na+/k+ transporting, beta 1 polypeptide, Gpr65 - g-protein coupled receptor 65, Ednra - endothelin receptor type a, Lpar6 - lysophosphatidic acid recep…
	GO:0050678	regulation of epithelial cell proliferation	1.77e-05	2.25	346	32	[Fgfr3 - fibroblast growth factor receptor 3, Sulf1 - sulfatase 1, Ar - androgen receptor, Runx3 - runt related transcription factor 3, Fgf9 - fibroblast growth factor 9, Atoh8 - atonal homolog 8 (drosophila), Glul - glutamate-ammonia ligase (glutamine synthetase), Ednra - endothelin receptor type a, Vegfc - vascular endothelial growth factor c, Agtr1a - angiotensin ii receptor, type 1a, Apln - a…
	GO:0048870	cell motility	6.02e-12	2.24	890	82	[Arc - activity regulated cytoskeletal-associated protein, Pik3c2b - phosphoinositide-3-kinase, class 2, beta polypeptide, Adamts12 - a disintegrin-like and metallopeptidase (reprolysin type) with thrombospondin type 1 motif, 12, Emp2 - epithelial membrane protein 2, Agtr1a - angiotensin ii receptor, type 1a, Ntrk2 - neurotrophic tyrosine kinase, receptor, type 2, Cxcl11 - chemokine (c-x-c motif)…
	GO:0098771	inorganic ion homeostasis	4.11e-09	2.22	681	62	[Hamp - hepcidin antimicrobial peptide, Gpr65 - g-protein coupled receptor 65, Agtr1a - angiotensin ii receptor, type 1a, Slc12a5 - solute carrier family 12, member 5, P2ry10 - purinergic receptor p2y, g-protein coupled 10, Drd1a - dopamine receptor d1a, P2ry2 - purinergic receptor p2y, g-protein coupled 2, Slamf8 - slam family member 8, Car2 - carbonic anhydrase 2, Ptgdr - prostaglandin d recept…
	GO:0070374	positive regulation of ERK1 and ERK2 cascade	0.000441	2.21	242	22	[Pdgfd - platelet-derived growth factor, d polypeptide, Fgfr3 - fibroblast growth factor receptor 3, Ccl11 - chemokine (c-c motif) ligand 11, Htr2a - 5-hydroxytryptamine (serotonin) receptor 2a, Epha6 - eph receptor a6, P2ry6 - pyrimidinergic receptor p2y, g-protein coupled, 6, Ednra - endothelin receptor type a, Pdgfb - platelet derived growth factor, b polypeptide, Kit - kit oncogene, Ntrk2 - n…
	GO:0055065	metal ion homeostasis	4.97e-08	2.2	596	54	[Hamp - hepcidin antimicrobial peptide, Gpr65 - g-protein coupled receptor 65, Agtr1a - angiotensin ii receptor, type 1a, Slc12a5 - solute carrier family 12, member 5, Drd1a - dopamine receptor d1a, P2ry10 - purinergic receptor p2y, g-protein coupled 10, P2ry2 - purinergic receptor p2y, g-protein coupled 2, Ptgdr - prostaglandin d receptor, Kcna5 - potassium voltage-gated channel, shaker-related …
	GO:0048729	tissue morphogenesis	3.74e-06	2.2	431	39	[Fgfr3 - fibroblast growth factor receptor 3, Ar - androgen receptor, Mycn - v-myc myelocytomatosis viral related oncogene, neuroblastoma derived (avian), Jag2 - jagged 2, Vegfc - vascular endothelial growth factor c, Areg - amphiregulin, Ednra - endothelin receptor type a, Shox2 - short stature homeobox 2, Col4a1 - collagen, type iv, alpha 1, Ret - ret proto-oncogene, Ptk7 - ptk7 protein tyrosin…
	GO:0032409	regulation of transporter activity	0.00035	2.2	254	23	[Gstm7 - glutathione s-transferase, mu 7, Arc - activity regulated cytoskeletal-associated protein, Lrrc55 - leucine rich repeat containing 55, Stac2 - sh3 and cysteine rich domain 2, Atp1b2 - atpase, na+/k+ transporting, beta 2 polypeptide, Gal - galanin, Atp1b1 - atpase, na+/k+ transporting, beta 1 polypeptide, Fam115c - family with sequence similarity 115, member c, Kcnc2 - potassium voltage g…
	GO:0006952	defense response	1.57e-12	2.19	1013	91	[Spon2 - spondin 2, extracellular matrix protein, Penk - preproenkephalin, Hamp - hepcidin antimicrobial peptide, Ptgs1 - prostaglandin-endoperoxide synthase 1, Agtr1a - angiotensin ii receptor, type 1a, Cxcl11 - chemokine (c-x-c motif) ligand 11, Elane - elastase, neutrophil expressed, Rnase6 - ribonuclease, rnase a family, 6, Drd1a - dopamine receptor d1a, Tlr6 - toll-like receptor 6, Nlrp6 - n…
	GO:0007167	enzyme linked receptor protein signaling pathway	8.33e-07	2.19	501	45	[Sulf1 - sulfatase 1, Fgfr3 - fibroblast growth factor receptor 3, Pdgfd - platelet-derived growth factor, d polypeptide, Fgf9 - fibroblast growth factor 9, Vegfc - vascular endothelial growth factor c, Areg - amphiregulin, Col4a2 - collagen, type iv, alpha 2, Ntrk2 - neurotrophic tyrosine kinase, receptor, type 2, Col4a1 - collagen, type iv, alpha 1, Fgr - gardner-rasheed feline sarcoma viral (f…
	GO:0098660	inorganic ion transmembrane transport	3.31e-06	2.19	445	40	[Slc26a10 - solute carrier family 26, member 10, Atp2b2 - atpase, ca++ transporting, plasma membrane 2, Tmc1 - transmembrane channel-like gene family 1, Kcnq4 - potassium voltage-gated channel, subfamily q, member 4, Atp1b2 - atpase, na+/k+ transporting, beta 2 polypeptide, Atp1b1 - atpase, na+/k+ transporting, beta 1 polypeptide, Slc12a8 - solute carrier family 12 (potassium/chloride transporter…
	GO:0022898	regulation of transmembrane transporter activity	0.000494	2.19	244	22	[Gstm7 - glutathione s-transferase, mu 7, Arc - activity regulated cytoskeletal-associated protein, Lrrc55 - leucine rich repeat containing 55, Stac2 - sh3 and cysteine rich domain 2, Gal - galanin, Atp1b2 - atpase, na+/k+ transporting, beta 2 polypeptide, Atp1b1 - atpase, na+/k+ transporting, beta 1 polypeptide, Fam115c - family with sequence similarity 115, member c, Kcnc2 - potassium voltage g…
	GO:0001818	negative regulation of cytokine production	0.000659	2.19	233	21	[Foxp3 - forkhead box p3, Gpr18 - g protein-coupled receptor 18, Cd96 - cd96 antigen, Epx - eosinophil peroxidase, Tnfrsf9 - tumor necrosis factor receptor superfamily, member 9, Pglyrp1 - peptidoglycan recognition protein 1, Elane - elastase, neutrophil expressed, Smad7 - smad family member 7, Tlr6 - toll-like receptor 6, Cd34 - cd34 antigen, Trib2 - tribbles homolog 2 (drosophila), Cd83 - cd83 …
	GO:0019932	second-messenger-mediated signaling	0.000413	2.18	257	23	[Tshr - thyroid stimulating hormone receptor, S1pr4 - sphingosine-1-phosphate receptor 4, Gal - galanin, Nr5a1 - nuclear receptor subfamily 5, group a, member 1, Atp1b1 - atpase, na+/k+ transporting, beta 1 polypeptide, Gpr65 - g-protein coupled receptor 65, Agtr1a - angiotensin ii receptor, type 1a, Ccr6 - chemokine (c-c motif) receptor 6, Kcnc2 - potassium voltage gated channel, shaw-related su…
	GO:1903706	regulation of hemopoiesis	1.55e-05	2.17	392	35	[Fgfr3 - fibroblast growth factor receptor 3, Il15 - interleukin 15, Ikzf1 - ikaros family zinc finger 1, Runx3 - runt related transcription factor 3, Ikzf3 - ikaros family zinc finger 3, Clec2i - c-type lectin domain family 2, member i, Hlx - h2.0-like homeobox, Cd83 - cd83 antigen, Ace - angiotensin i converting enzyme (peptidyl-dipeptidase a) 1, Nckap1l - nck associated protein 1 like, Ccl3 - …
	GO:0015672	monovalent inorganic cation transport	8.2e-05	2.17	325	29	[Slc10a5 - solute carrier family 10 (sodium/bile acid cotransporter family), member 5, Kcnq4 - potassium voltage-gated channel, subfamily q, member 4, Atp1b2 - atpase, na+/k+ transporting, beta 2 polypeptide, Atp1b1 - atpase, na+/k+ transporting, beta 1 polypeptide, Slc12a8 - solute carrier family 12 (potassium/chloride transporters), member 8, Kcnc2 - potassium voltage gated channel, shaw-relate…
	GO:0030182	neuron differentiation	0.000146	2.17	303	27	[Fgfr3 - fibroblast growth factor receptor 3, Id3 - inhibitor of dna binding 3, Atp2b2 - atpase, ca++ transporting, plasma membrane 2, Runx3 - runt related transcription factor 3, Ikzf1 - ikaros family zinc finger 1, Foxn4 - forkhead box n4, Cbln1 - cerebellin 1 precursor protein, Hoxa1 - homeobox a1, Ntrk2 - neurotrophic tyrosine kinase, receptor, type 2, Tlx1 - t cell leukemia, homeobox 1, Ret …
	GO:0030336	negative regulation of cell migration	0.000583	2.17	247	22	[Sulf1 - sulfatase 1, Arhgap4 - rho gtpase activating protein 4, Gpr18 - g protein-coupled receptor 18, Marveld3 - marvel (membrane-associating) domain containing 3, Cited2 - cbp/p300-interacting transactivator, with glu/asp-rich carboxy-terminal domain, 2, Pdgfb - platelet derived growth factor, b polypeptide, Abcc8 - atp-binding cassette, sub-family c (cftr/mrp), member 8, Stap1 - signal transd…
	GO:0050801	ion homeostasis	3.26e-09	2.16	742	66	[Hamp - hepcidin antimicrobial peptide, Gpr65 - g-protein coupled receptor 65, Agtr1a - angiotensin ii receptor, type 1a, Slc12a5 - solute carrier family 12, member 5, P2ry10 - purinergic receptor p2y, g-protein coupled 10, Drd1a - dopamine receptor d1a, P2ry2 - purinergic receptor p2y, g-protein coupled 2, Slamf8 - slam family member 8, Car2 - carbonic anhydrase 2, Ptgdr - prostaglandin d recept…
	GO:0044057	regulation of system process	2.88e-07	2.16	563	50	[Mgll - monoglyceride lipase, Emp2 - epithelial membrane protein 2, Ptgs1 - prostaglandin-endoperoxide synthase 1, Agtr1a - angiotensin ii receptor, type 1a, Abcc8 - atp-binding cassette, sub-family c (cftr/mrp), member 8, Drd1a - dopamine receptor d1a, Olfr78 - olfactory receptor 78, Pde5a - phosphodiesterase 5a, cgmp-specific, Ace - angiotensin i converting enzyme (peptidyl-dipeptidase a) 1, Re…
	GO:0050778	positive regulation of immune response	1.35e-06	2.15	510	45	[Spon2 - spondin 2, extracellular matrix protein, Il15 - interleukin 15, Cd3e - cd3 antigen, epsilon polypeptide, Il1r1 - interleukin 1 receptor, type i, Skap1 - src family associated phosphoprotein 1, Fgr - gardner-rasheed feline sarcoma viral (fgr) oncogene homolog, Il18rap - interleukin 18 receptor accessory protein, Elane - elastase, neutrophil expressed, Cadm1 - cell adhesion molecule 1, Cle…
	GO:0002009	morphogenesis of an epithelium	0.000107	2.14	330	29	[Fgfr3 - fibroblast growth factor receptor 3, Ar - androgen receptor, Mycn - v-myc myelocytomatosis viral related oncogene, neuroblastoma derived (avian), Jag2 - jagged 2, Ednra - endothelin receptor type a, Areg - amphiregulin, Vegfc - vascular endothelial growth factor c, Col4a1 - collagen, type iv, alpha 1, Ptk7 - ptk7 protein tyrosine kinase 7, Cxcl12 - chemokine (c-x-c motif) ligand 12, Tbx5…
	GO:0055082	cellular chemical homeostasis	4.04e-08	2.13	674	59	[Hamp - hepcidin antimicrobial peptide, Gpr65 - g-protein coupled receptor 65, Agtr1a - angiotensin ii receptor, type 1a, Abcc8 - atp-binding cassette, sub-family c (cftr/mrp), member 8, Slc12a5 - solute carrier family 12, member 5, P2ry10 - purinergic receptor p2y, g-protein coupled 10, Drd1a - dopamine receptor d1a, Hk3 - hexokinase 3, P2ry2 - purinergic receptor p2y, g-protein coupled 2, Slamf…
	GO:0040012	regulation of locomotion	1.04e-10	2.12	942	82	[Sulf1 - sulfatase 1, Pdgfd - platelet-derived growth factor, d polypeptide, Arhgap4 - rho gtpase activating protein 4, Emp2 - epithelial membrane protein 2, Il1r1 - interleukin 1 receptor, type i, Abcc8 - atp-binding cassette, sub-family c (cftr/mrp), member 8, Elane - elastase, neutrophil expressed, Drd1a - dopamine receptor d1a, P2ry2 - purinergic receptor p2y, g-protein coupled 2, Gcnt2 - glu…
	GO:0031349	positive regulation of defense response	0.000475	2.12	276	24	[Penk - preproenkephalin, Fcnb - ficolin b, Sh2d1a - sh2 domain protein 1a, Ednra - endothelin receptor type a, Il18rap - interleukin 18 receptor accessory protein, Cadm1 - cell adhesion molecule 1, Tnfsf18 - tumor necrosis factor (ligand) superfamily, member 18, Aim2 - absent in melanoma 2, S100a9 - s100 calcium binding protein a9 (calgranulin b), Tlr6 - toll-like receptor 6, Fcer1a - fc recepto…
	GO:0007166	cell surface receptor signaling pathway	3.83e-17	2.1	1586	137	[Tspan13 - tetraspanin 13, Areg - amphiregulin, Ntrk2 - neurotrophic tyrosine kinase, receptor, type 2, Fcer1a - fc receptor, ige, high affinity i, alpha polypeptide, Gcnt2 - glucosaminyl (n-acetyl) transferase 2, i-branching enzyme, Hspb1 - heat shock protein 1, Gcgr - glucagon receptor, Ceacam1 - carcinoembryonic antigen-related cell adhesion molecule 1, Ptchd1 - patched domain containing 1, Ma…
	GO:0034762	regulation of transmembrane transport	1.57e-06	2.09	546	47	[Arc - activity regulated cytoskeletal-associated protein, Tmc1 - transmembrane channel-like gene family 1, Kcnq4 - potassium voltage-gated channel, subfamily q, member 4, Gal - galanin, Tspan13 - tetraspanin 13, Hamp - hepcidin antimicrobial peptide, Atp1b2 - atpase, na+/k+ transporting, beta 2 polypeptide, Atp1b1 - atpase, na+/k+ transporting, beta 1 polypeptide, Fam115c - family with sequence …
	GO:0098662	inorganic cation transmembrane transport	4.77e-05	2.08	397	34	[Atp2b2 - atpase, ca++ transporting, plasma membrane 2, Tmc1 - transmembrane channel-like gene family 1, Kcnq4 - potassium voltage-gated channel, subfamily q, member 4, Atp1b2 - atpase, na+/k+ transporting, beta 2 polypeptide, Atp1b1 - atpase, na+/k+ transporting, beta 1 polypeptide, Kcnc2 - potassium voltage gated channel, shaw-related subfamily, member 2, Tmem37 - transmembrane protein 37, Slc1…
	GO:1901342	regulation of vasculature development	0.000216	2.08	327	28	[Pdgfd - platelet-derived growth factor, d polypeptide, Sulf1 - sulfatase 1, Anxa3 - annexin a3, Emp2 - epithelial membrane protein 2, Vegfc - vascular endothelial growth factor c, Agtr1a - angiotensin ii receptor, type 1a, Abcc8 - atp-binding cassette, sub-family c (cftr/mrp), member 8, Col4a2 - collagen, type iv, alpha 2, Hspb1 - heat shock protein 1, Vash1 - vasohibin 1, Ecm1 - extracellular m…
	GO:0010817	regulation of hormone levels	3.76e-06	2.07	530	45	[Glul - glutamate-ammonia ligase (glutamine synthetase), Gal - galanin, Ptgs1 - prostaglandin-endoperoxide synthase 1, Syt7 - synaptotagmin vii, Agtr1a - angiotensin ii receptor, type 1a, Pcsk1 - proprotein convertase subtilisin/kexin type 1, Abcc8 - atp-binding cassette, sub-family c (cftr/mrp), member 8, Hsd11b2 - hydroxysteroid 11-beta dehydrogenase 2, Plb1 - phospholipase b1, Apln - apelin, A…
	GO:0051050	positive regulation of transport	1.7e-10	2.05	1019	86	[Arc - activity regulated cytoskeletal-associated protein, Fez1 - fasciculation and elongation protein zeta 1 (zygin i), Agtr1a - angiotensin ii receptor, type 1a, Kcnc2 - potassium voltage gated channel, shaw-related subfamily, member 2, Abcc8 - atp-binding cassette, sub-family c (cftr/mrp), member 8, Drd1a - dopamine receptor d1a, P2ry2 - purinergic receptor p2y, g-protein coupled 2, Fcer1a - f…
	GO:1904062	regulation of cation transmembrane transport	0.000351	2.05	320	27	[Arc - activity regulated cytoskeletal-associated protein, Tmc1 - transmembrane channel-like gene family 1, Hamp - hepcidin antimicrobial peptide, Tspan13 - tetraspanin 13, Gal - galanin, Atp1b2 - atpase, na+/k+ transporting, beta 2 polypeptide, Atp1b1 - atpase, na+/k+ transporting, beta 1 polypeptide, Ednra - endothelin receptor type a, Kcnc2 - potassium voltage gated channel, shaw-related subfa…
	GO:0051240	positive regulation of multicellular organismal process	1.56e-17	2.04	1775	149	[Penk - preproenkephalin, Ar - androgen receptor, Ikzf1 - ikaros family zinc finger 1, Ptgs1 - prostaglandin-endoperoxide synthase 1, Ntrk2 - neurotrophic tyrosine kinase, receptor, type 2, Abcc8 - atp-binding cassette, sub-family c (cftr/mrp), member 8, Elane - elastase, neutrophil expressed, Fcer1a - fc receptor, ige, high affinity i, alpha polypeptide, Gcnt2 - glucosaminyl (n-acetyl) transfera…
	GO:0019725	cellular homeostasis	3.25e-08	2.04	787	66	[Hamp - hepcidin antimicrobial peptide, Gpr65 - g-protein coupled receptor 65, Agtr1a - angiotensin ii receptor, type 1a, Abcc8 - atp-binding cassette, sub-family c (cftr/mrp), member 8, Slc12a5 - solute carrier family 12, member 5, Hk3 - hexokinase 3, P2ry10 - purinergic receptor p2y, g-protein coupled 10, Drd1a - dopamine receptor d1a, P2ry2 - purinergic receptor p2y, g-protein coupled 2, Slamf…
	GO:0046903	secretion	1.81e-05	2.04	478	40	[Atp2b2 - atpase, ca++ transporting, plasma membrane 2, Anxa3 - annexin a3, Aqp9 - aquaporin 9, Cbln1 - cerebellin 1 precursor protein, Lin7a - lin-7 homolog a (c. elegans), Ednra - endothelin receptor type a, Syt7 - synaptotagmin vii, Abcc3 - atp-binding cassette, sub-family c (cftr/mrp), member 3, Agtr1a - angiotensin ii receptor, type 1a, Ntrk2 - neurotrophic tyrosine kinase, receptor, type 2,…
	GO:0032940	secretion by cell	0.000151	2.04	370	31	[Anxa3 - annexin a3, Cbln1 - cerebellin 1 precursor protein, Syt7 - synaptotagmin vii, Lin7a - lin-7 homolog a (c. elegans), Agtr1a - angiotensin ii receptor, type 1a, Ntrk2 - neurotrophic tyrosine kinase, receptor, type 2, Rab15 - rab15, member ras oncogene family, Hck - hemopoietic cell kinase, Tlr6 - toll-like receptor 6, Fcer1a - fc receptor, ige, high affinity i, alpha polypeptide, Akap5 - a…
	GO:0070372	regulation of ERK1 and ERK2 cascade	0.000387	2.04	322	27	[Fgfr3 - fibroblast growth factor receptor 3, Pdgfd - platelet-derived growth factor, d polypeptide, Tbc1d10c - tbc1 domain family, member 10c, Ednra - endothelin receptor type a, Ntrk2 - neurotrophic tyrosine kinase, receptor, type 2, Dmd - dystrophin, muscular dystrophy, Ret - ret proto-oncogene, Gcnt2 - glucosaminyl (n-acetyl) transferase 2, i-branching enzyme, Nlrp6 - nlr family, pyrin domain…
	GO:1902533	positive regulation of intracellular signal transduction	2.73e-09	2.01	957	79	[Pdgfd - platelet-derived growth factor, d polypeptide, Il15 - interleukin 15, Ar - androgen receptor, Gpr65 - g-protein coupled receptor 65, Cd3e - cd3 antigen, epsilon polypeptide, Ntrk2 - neurotrophic tyrosine kinase, receptor, type 2, P2ry10 - purinergic receptor p2y, g-protein coupled 10, Tlr6 - toll-like receptor 6, Gcnt2 - glucosaminyl (n-acetyl) transferase 2, i-branching enzyme, Fcer1a -…
	GO:0042127	regulation of cell proliferation	5.05e-14	1.96	1628	131	[Rasal3 - ras protein activator like 3, Ar - androgen receptor, Ikzf3 - ikaros family zinc finger 3, Ptgs1 - prostaglandin-endoperoxide synthase 1, Areg - amphiregulin, Ntrk2 - neurotrophic tyrosine kinase, receptor, type 2, Abcc8 - atp-binding cassette, sub-family c (cftr/mrp), member 8, Elane - elastase, neutrophil expressed, Gcnt2 - glucosaminyl (n-acetyl) transferase 2, i-branching enzyme, Pd…
	GO:0007610	behavior	2.94e-06	1.96	644	52	[Arc - activity regulated cytoskeletal-associated protein, Penk - preproenkephalin, Ar - androgen receptor, Ptgs1 - prostaglandin-endoperoxide synthase 1, Agtr1a - angiotensin ii receptor, type 1a, Abcc8 - atp-binding cassette, sub-family c (cftr/mrp), member 8, Ntrk2 - neurotrophic tyrosine kinase, receptor, type 2, Sez6l2 - seizure related 6 homolog like 2, Slc12a5 - solute carrier family 12, m…
	GO:0098655	cation transmembrane transport	0.000156	1.96	422	34	[Atp2b2 - atpase, ca++ transporting, plasma membrane 2, Tmc1 - transmembrane channel-like gene family 1, Kcnq4 - potassium voltage-gated channel, subfamily q, member 4, Atp1b2 - atpase, na+/k+ transporting, beta 2 polypeptide, Atp1b1 - atpase, na+/k+ transporting, beta 1 polypeptide, Kcnc2 - potassium voltage gated channel, shaw-related subfamily, member 2, Tmem37 - transmembrane protein 37, Slc1…
	GO:0006928	movement of cell or subcellular component	1.36e-10	1.94	1239	99	[Arc - activity regulated cytoskeletal-associated protein, Adamts12 - a disintegrin-like and metallopeptidase (reprolysin type) with thrombospondin type 1 motif, 12, Ntrk2 - neurotrophic tyrosine kinase, receptor, type 2, Elane - elastase, neutrophil expressed, Drd1a - dopamine receptor d1a, Hspb1 - heat shock protein 1, Spata13 - spermatogenesis associated 13, Uchl1 - ubiquitin carboxy-terminal …
	GO:0048638	regulation of developmental growth	0.000569	1.91	382	30	[Fgfr3 - fibroblast growth factor receptor 3, Mgll - monoglyceride lipase, Ikzf1 - ikaros family zinc finger 1, Ar - androgen receptor, Fgf9 - fibroblast growth factor 9, Arhgap4 - rho gtpase activating protein 4, Gal - galanin, Hlx - h2.0-like homeobox, Cxcl12 - chemokine (c-x-c motif) ligand 12, Tbx5 - t-box 5, Eppk1 - epiplakin 1, Tbx2 - t-box 2, Acacb - acetyl-coenzyme a carboxylase beta, Tsh…
	GO:0008284	positive regulation of cell proliferation	6.7e-08	1.9	959	75	[Rasal3 - ras protein activator like 3, Pdgfd - platelet-derived growth factor, d polypeptide, Il15 - interleukin 15, Ar - androgen receptor, Emp2 - epithelial membrane protein 2, Areg - amphiregulin, Cd3e - cd3 antigen, epsilon polypeptide, Agtr1a - angiotensin ii receptor, type 1a, Ntrk2 - neurotrophic tyrosine kinase, receptor, type 2, Tlx1 - t cell leukemia, homeobox 1, Elane - elastase, neut…
	GO:0051222	positive regulation of protein transport	0.000404	1.9	409	32	[Glul - glutamate-ammonia ligase (glutamine synthetase), Fam115c - family with sequence similarity 115, member c, Vegfc - vascular endothelial growth factor c, Agtr1a - angiotensin ii receptor, type 1a, Fgr - gardner-rasheed feline sarcoma viral (fgr) oncogene homolog, Cadm1 - cell adhesion molecule 1, Olfr78 - olfactory receptor 78, Akap5 - a kinase (prka) anchor protein 5, Tmem30b - transmembra…
	GO:0048878	chemical homeostasis	3.34e-08	1.89	1031	80	[Hamp - hepcidin antimicrobial peptide, Gpr65 - g-protein coupled receptor 65, Agtr1a - angiotensin ii receptor, type 1a, Abcc8 - atp-binding cassette, sub-family c (cftr/mrp), member 8, Slc12a5 - solute carrier family 12, member 5, Drd1a - dopamine receptor d1a, Hk3 - hexokinase 3, P2ry10 - purinergic receptor p2y, g-protein coupled 10, P2ry2 - purinergic receptor p2y, g-protein coupled 2, Gcgr …
	GO:0034220	ion transmembrane transport	3.34e-05	1.89	578	45	[Slc26a10 - solute carrier family 26, member 10, Atp2b2 - atpase, ca++ transporting, plasma membrane 2, Tmc1 - transmembrane channel-like gene family 1, Kcnq4 - potassium voltage-gated channel, subfamily q, member 4, Atp1b2 - atpase, na+/k+ transporting, beta 2 polypeptide, Atp1b1 - atpase, na+/k+ transporting, beta 1 polypeptide, Slc12a8 - solute carrier family 12 (potassium/chloride transporter…
	GO:0042391	regulation of membrane potential	0.000379	1.89	425	33	[Slc26a10 - solute carrier family 26, member 10, Slc9a3r2 - solute carrier family 9 (sodium/hydrogen exchanger), member 3 regulator 2, Atp1b2 - atpase, na+/k+ transporting, beta 2 polypeptide, Atp1b1 - atpase, na+/k+ transporting, beta 1 polypeptide, Cbln1 - cerebellin 1 precursor protein, Kcnc2 - potassium voltage gated channel, shaw-related subfamily, member 2, Dmd - dystrophin, muscular dystro…
	GO:0009888	tissue development	3.25e-05	1.88	595	46	[Fgfr3 - fibroblast growth factor receptor 3, Atp2b2 - atpase, ca++ transporting, plasma membrane 2, Arc - activity regulated cytoskeletal-associated protein, Dmp1 - dentin matrix protein 1, Ikzf1 - ikaros family zinc finger 1, Vcan - versican, Fgf9 - fibroblast growth factor 9, Ovol1 - ovo homolog-like 1 (drosophila), Rbm24 - rna binding motif protein 24, Dmd - dystrophin, muscular dystrophy, Re…
	GO:0006812	cation transport	7.85e-06	1.87	702	54	[Slc10a5 - solute carrier family 10 (sodium/bile acid cotransporter family), member 5, Kcnc2 - potassium voltage gated channel, shaw-related subfamily, member 2, Tmem37 - transmembrane protein 37, Abcc8 - atp-binding cassette, sub-family c (cftr/mrp), member 8, Slc12a5 - solute carrier family 12, member 5, Drd1a - dopamine receptor d1a, Fcer1a - fc receptor, ige, high affinity i, alpha polypeptid…
	GO:0030001	metal ion transport	8.95e-05	1.86	549	42	[Atp2b2 - atpase, ca++ transporting, plasma membrane 2, Slc10a5 - solute carrier family 10 (sodium/bile acid cotransporter family), member 5, Tmc1 - transmembrane channel-like gene family 1, Kcnq4 - potassium voltage-gated channel, subfamily q, member 4, Atp1b2 - atpase, na+/k+ transporting, beta 2 polypeptide, Atp1b1 - atpase, na+/k+ transporting, beta 1 polypeptide, Nipal2 - nipa-like domain co…
	GO:0032879	regulation of localization	7.47e-19	1.85	2627	200	[Tspan13 - tetraspanin 13, Ptgs1 - prostaglandin-endoperoxide synthase 1, Syt7 - synaptotagmin vii, Tmem37 - transmembrane protein 37, Abcc8 - atp-binding cassette, sub-family c (cftr/mrp), member 8, Ntrk2 - neurotrophic tyrosine kinase, receptor, type 2, Pcdh17 - protocadherin 17, Fcer1a - fc receptor, ige, high affinity i, alpha polypeptide, Ace - angiotensin i converting enzyme (peptidyl-dipep…
	GO:0006820	anion transport	0.000547	1.85	434	33	[Slc26a10 - solute carrier family 26, member 10, Aqp9 - aquaporin 9, Abcc3 - atp-binding cassette, sub-family c (cftr/mrp), member 3, Slc12a8 - solute carrier family 12 (potassium/chloride transporters), member 8, Ntrk2 - neurotrophic tyrosine kinase, receptor, type 2, Slc12a5 - solute carrier family 12, member 5, Lrrc8c - leucine rich repeat containing 8 family, member c, Gabre - gamma-aminobuty…
	GO:0048584	positive regulation of response to stimulus	7.6e-14	1.84	1998	151	[Arc - activity regulated cytoskeletal-associated protein, Penk - preproenkephalin, Ar - androgen receptor, Ntrk2 - neurotrophic tyrosine kinase, receptor, type 2, Elane - elastase, neutrophil expressed, Fcer1a - fc receptor, ige, high affinity i, alpha polypeptide, Gcnt2 - glucosaminyl (n-acetyl) transferase 2, i-branching enzyme, Hspb1 - heat shock protein 1, Pde5a - phosphodiesterase 5a, cgmp-…
	GO:0051094	positive regulation of developmental process	1.47e-10	1.84	1491	113	[Ikzf1 - ikaros family zinc finger 1, Ar - androgen receptor, Ntrk2 - neurotrophic tyrosine kinase, receptor, type 2, Gcnt2 - glucosaminyl (n-acetyl) transferase 2, i-branching enzyme, Hspb1 - heat shock protein 1, Pde5a - phosphodiesterase 5a, cgmp-specific, Ace - angiotensin i converting enzyme (peptidyl-dipeptidase a) 1, Retn - resistin, Gdpd2 - glycerophosphodiester phosphodiesterase domain c…
	GO:0043410	positive regulation of MAPK cascade	0.00021	1.84	517	39	[Fgfr3 - fibroblast growth factor receptor 3, Pdgfd - platelet-derived growth factor, d polypeptide, Ar - androgen receptor, Fgf9 - fibroblast growth factor 9, Ednra - endothelin receptor type a, Ntrk2 - neurotrophic tyrosine kinase, receptor, type 2, Ret - ret proto-oncogene, Tlr6 - toll-like receptor 6, Gcnt2 - glucosaminyl (n-acetyl) transferase 2, i-branching enzyme, Fcer1a - fc receptor, ige…
	GO:1904951	positive regulation of establishment of protein localization	0.000718	1.84	423	32	[Glul - glutamate-ammonia ligase (glutamine synthetase), Fam115c - family with sequence similarity 115, member c, Vegfc - vascular endothelial growth factor c, Agtr1a - angiotensin ii receptor, type 1a, Fgr - gardner-rasheed feline sarcoma viral (fgr) oncogene homolog, Cadm1 - cell adhesion molecule 1, Olfr78 - olfactory receptor 78, Akap5 - a kinase (prka) anchor protein 5, Tmem30b - transmembra…
	GO:0051239	regulation of multicellular organismal process	2.38e-21	1.83	3054	230	[Ikzf1 - ikaros family zinc finger 1, Ikzf3 - ikaros family zinc finger 3, Ptgs1 - prostaglandin-endoperoxide synthase 1, Syt7 - synaptotagmin vii, Ntrk2 - neurotrophic tyrosine kinase, receptor, type 2, Abcc8 - atp-binding cassette, sub-family c (cftr/mrp), member 8, Fcer1a - fc receptor, ige, high affinity i, alpha polypeptide, Pde5a - phosphodiesterase 5a, cgmp-specific, Ace - angiotensin i co…
	GO:0051049	regulation of transport	2.49e-12	1.83	1809	136	[Arc - activity regulated cytoskeletal-associated protein, Tspan13 - tetraspanin 13, Ptgs1 - prostaglandin-endoperoxide synthase 1, Syt7 - synaptotagmin vii, Tmem37 - transmembrane protein 37, Ntrk2 - neurotrophic tyrosine kinase, receptor, type 2, Abcc8 - atp-binding cassette, sub-family c (cftr/mrp), member 8, Pcdh17 - protocadherin 17, Drd1a - dopamine receptor d1a, Fcer1a - fc receptor, ige, …
	GO:0008285	negative regulation of cell proliferation	3.09e-05	1.83	665	50	[Sulf1 - sulfatase 1, Il15 - interleukin 15, Ar - androgen receptor, Ovol1 - ovo homolog-like 1 (drosophila), Abcc8 - atp-binding cassette, sub-family c (cftr/mrp), member 8, Pde5a - phosphodiesterase 5a, cgmp-specific, Gpr56 - g protein-coupled receptor 56, Sh3bp4 - sh3-domain binding protein 4, Lims2 - lim and senescent cell antigen like domains 2, Ceacam1 - carcinoembryonic antigen-related cel…
	GO:0008283	cell proliferation	0.000128	1.83	558	42	[Il15 - interleukin 15, Klk8 - kallikrein related-peptidase 8, Atoh8 - atonal homolog 8 (drosophila), Glul - glutamate-ammonia ligase (glutamine synthetase), Areg - amphiregulin, Ednra - endothelin receptor type a, Il18rap - interleukin 18 receptor accessory protein, Cd180 - cd180 antigen, Lta - lymphotoxin a, Plxnb2 - plexin b2, Ace - angiotensin i converting enzyme (peptidyl-dipeptidase a) 1, C…
	GO:0051046	regulation of secretion	4.13e-06	1.82	829	62	[Ptgs1 - prostaglandin-endoperoxide synthase 1, Syt7 - synaptotagmin vii, Agtr1a - angiotensin ii receptor, type 1a, Abcc8 - atp-binding cassette, sub-family c (cftr/mrp), member 8, Ntrk2 - neurotrophic tyrosine kinase, receptor, type 2, Entpd1 - ectonucleoside triphosphate diphosphohydrolase 1, Rab15 - rab15, member ras oncogene family, Tlr6 - toll-like receptor 6, P2ry2 - purinergic receptor p2…
	GO:0051241	negative regulation of multicellular organismal process	1.69e-08	1.81	1248	93	[Sulf1 - sulfatase 1, Adamts12 - a disintegrin-like and metallopeptidase (reprolysin type) with thrombospondin type 1 motif, 12, Arhgap4 - rho gtpase activating protein 4, Fam101b - family with sequence similarity 101, member b, Hamp - hepcidin antimicrobial peptide, Areg - amphiregulin, Cd96 - cd96 antigen, Abcc8 - atp-binding cassette, sub-family c (cftr/mrp), member 8, Elane - elastase, neutro…
	GO:0050708	regulation of protein secretion	0.000907	1.8	447	33	[Glul - glutamate-ammonia ligase (glutamine synthetase), Syt7 - synaptotagmin vii, Vegfc - vascular endothelial growth factor c, Agtr1a - angiotensin ii receptor, type 1a, Abcc8 - atp-binding cassette, sub-family c (cftr/mrp), member 8, Fgr - gardner-rasheed feline sarcoma viral (fgr) oncogene homolog, Cadm1 - cell adhesion molecule 1, Tlr6 - toll-like receptor 6, Olfr78 - olfactory receptor 78, …
	GO:1903530	regulation of secretion by cell	2.61e-05	1.78	751	55	[Ptgs1 - prostaglandin-endoperoxide synthase 1, Syt7 - synaptotagmin vii, Agtr1a - angiotensin ii receptor, type 1a, Ntrk2 - neurotrophic tyrosine kinase, receptor, type 2, Abcc8 - atp-binding cassette, sub-family c (cftr/mrp), member 8, Entpd1 - ectonucleoside triphosphate diphosphohydrolase 1, Rab15 - rab15, member ras oncogene family, Tlr6 - toll-like receptor 6, Fcer1a - fc receptor, ige, hig…
	GO:0009653	anatomical structure morphogenesis	3.24e-09	1.77	1498	109	[Ar - androgen receptor, Areg - amphiregulin, Cldn3 - claudin 3, Cml1 - camello-like 1, Uchl1 - ubiquitin carboxy-terminal hydrolase l1, Car2 - carbonic anhydrase 2, Whrn - whirlin, Gcnt1 - glucosaminyl (n-acetyl) transferase 1, core 2, Slitrk6 - slit and ntrk-like family, member 6, Map2 - microtubule-associated protein 2, Nptx1 - neuronal pentraxin 1, Map1a - microtubule-associated protein 1 a, …
	GO:0023052	signaling	0.000766	1.76	497	36	[Fgfr3 - fibroblast growth factor receptor 3, Penk - preproenkephalin, Pcdh18 - protocadherin 18, Fgf9 - fibroblast growth factor 9, Ntrk2 - neurotrophic tyrosine kinase, receptor, type 2, Slc12a5 - solute carrier family 12, member 5, Pcdh17 - protocadherin 17, Drd1a - dopamine receptor d1a, Gabre - gamma-aminobutyric acid (gaba) a receptor, subunit epsilon, Dsp - desmoplakin, Tbx5 - t-box 5, Wnt…
	GO:0002791	regulation of peptide secretion	0.000961	1.76	485	35	[Glul - glutamate-ammonia ligase (glutamine synthetase), Syt7 - synaptotagmin vii, Vegfc - vascular endothelial growth factor c, Agtr1a - angiotensin ii receptor, type 1a, Abcc8 - atp-binding cassette, sub-family c (cftr/mrp), member 8, Fgr - gardner-rasheed feline sarcoma viral (fgr) oncogene homolog, Cadm1 - cell adhesion molecule 1, Apln - apelin, Tlr6 - toll-like receptor 6, Olfr78 - olfactor…
	GO:2000026	regulation of multicellular organismal development	5.46e-12	1.75	2090	150	[Arc - activity regulated cytoskeletal-associated protein, Ar - androgen receptor, Ikzf1 - ikaros family zinc finger 1, Adamts12 - a disintegrin-like and metallopeptidase (reprolysin type) with thrombospondin type 1 motif, 12, Ikzf3 - ikaros family zinc finger 3, Ntrk2 - neurotrophic tyrosine kinase, receptor, type 2, Abcc8 - atp-binding cassette, sub-family c (cftr/mrp), member 8, Gcnt2 - glucos…
	GO:0042592	homeostatic process	1.62e-08	1.75	1431	103	[Abcc8 - atp-binding cassette, sub-family c (cftr/mrp), member 8, Slc12a5 - solute carrier family 12, member 5, Hk3 - hexokinase 3, Drd1a - dopamine receptor d1a, Gcnt2 - glucosaminyl (n-acetyl) transferase 2, i-branching enzyme, C1qtnf9 - c1q and tumor necrosis factor related protein 9, Gcgr - glucagon receptor, Car2 - carbonic anhydrase 2, Whrn - whirlin, Ptgdr - prostaglandin d receptor, Slc2a…
	GO:0006811	ion transport	1.09e-06	1.74	1104	79	[Slc10a5 - solute carrier family 10 (sodium/bile acid cotransporter family), member 5, Tmem37 - transmembrane protein 37, Kcnc2 - potassium voltage gated channel, shaw-related subfamily, member 2, Ntrk2 - neurotrophic tyrosine kinase, receptor, type 2, Abcc8 - atp-binding cassette, sub-family c (cftr/mrp), member 8, Slc12a5 - solute carrier family 12, member 5, Lrrc8c - leucine rich repeat contai…
	GO:0045597	positive regulation of cell differentiation	1.82e-06	1.74	1063	76	[Il15 - interleukin 15, Ikzf1 - ikaros family zinc finger 1, Ar - androgen receptor, Fez1 - fasciculation and elongation protein zeta 1 (zygin i), Il1r1 - interleukin 1 receptor, type i, Ntrk2 - neurotrophic tyrosine kinase, receptor, type 2, P2ry2 - purinergic receptor p2y, g-protein coupled 2, Gcnt2 - glucosaminyl (n-acetyl) transferase 2, i-branching enzyme, Hspb1 - heat shock protein 1, Pde5a…
	GO:0009967	positive regulation of signal transduction	7.64e-08	1.71	1438	101	[Arc - activity regulated cytoskeletal-associated protein, Ar - androgen receptor, Ntrk2 - neurotrophic tyrosine kinase, receptor, type 2, Fcer1a - fc receptor, ige, high affinity i, alpha polypeptide, Gcnt2 - glucosaminyl (n-acetyl) transferase 2, i-branching enzyme, Pde5a - phosphodiesterase 5a, cgmp-specific, Lims2 - lim and senescent cell antigen like domains 2, Bank1 - b cell scaffold protei…
	GO:0048646	anatomical structure formation involved in morphogenesis	0.000102	1.71	753	53	[Ar - androgen receptor, Tlx1 - t cell leukemia, homeobox 1, Mcam - melanoma cell adhesion molecule, Ace - angiotensin i converting enzyme (peptidyl-dipeptidase a) 1, Gpr56 - g protein-coupled receptor 56, Lhx2 - lim homeobox protein 2, Whrn - whirlin, Itga6 - integrin alpha 6, Sox17 - sry-box containing gene 17, Neurl2 - neuralized-like 2 (drosophila), Sox11 - sry-box containing gene 11, Pdgfrb …
	GO:0048731	system development	0.000109	1.71	755	53	[Sulf1 - sulfatase 1, Ar - androgen receptor, Pcdh18 - protocadherin 18, Jag2 - jagged 2, Ntrk2 - neurotrophic tyrosine kinase, receptor, type 2, Nes - nestin, Tlx1 - t cell leukemia, homeobox 1, Sspo - sco-spondin, Barx2 - barh-like homeobox 2, Hlx - h2.0-like homeobox, Gpr56 - g protein-coupled receptor 56, Lhx6 - lim homeobox protein 6, Lhx2 - lim homeobox protein 2, Hdac9 - histone deacetylas…
	GO:0030154	cell differentiation	3.45e-11	1.7	2161	151	[Ar - androgen receptor, Ikzf1 - ikaros family zinc finger 1, Ptgs1 - prostaglandin-endoperoxide synthase 1, Ntrk2 - neurotrophic tyrosine kinase, receptor, type 2, Peg10 - paternally expressed 10, Tdrd12 - tudor domain containing 12, Retn - resistin, Whrn - whirlin, Slc2a4 - solute carrier family 2 (facilitated glucose transporter), member 4, Sla - src-like adaptor, Odf4 - outer dense fiber of s…
	GO:0055085	transmembrane transport	3.84e-05	1.7	873	61	[Tmem37 - transmembrane protein 37, Kcnc2 - potassium voltage gated channel, shaw-related subfamily, member 2, Abcc8 - atp-binding cassette, sub-family c (cftr/mrp), member 8, Slc12a5 - solute carrier family 12, member 5, Lrrc8c - leucine rich repeat containing 8 family, member c, Drd1a - dopamine receptor d1a, Abcb1b - atp-binding cassette, sub-family b (mdr/tap), member 1b, Emb - embigin, Abcb1…
	GO:0050793	regulation of developmental process	2.34e-13	1.69	2632	183	[Arc - activity regulated cytoskeletal-associated protein, Ar - androgen receptor, Ikzf1 - ikaros family zinc finger 1, Adamts12 - a disintegrin-like and metallopeptidase (reprolysin type) with thrombospondin type 1 motif, 12, Ikzf3 - ikaros family zinc finger 3, Areg - amphiregulin, Ntrk2 - neurotrophic tyrosine kinase, receptor, type 2, Rbpms2 - rna binding protein with multiple splicing 2, Abc…
	GO:0045595	regulation of cell differentiation	1.72e-09	1.69	1856	129	[Arc - activity regulated cytoskeletal-associated protein, Ar - androgen receptor, Ikzf1 - ikaros family zinc finger 1, Adamts12 - a disintegrin-like and metallopeptidase (reprolysin type) with thrombospondin type 1 motif, 12, Ikzf3 - ikaros family zinc finger 3, Areg - amphiregulin, Ntrk2 - neurotrophic tyrosine kinase, receptor, type 2, Abcc8 - atp-binding cassette, sub-family c (cftr/mrp), mem…
	GO:0042327	positive regulation of phosphorylation	1.04e-05	1.69	1021	71	[Pdgfd - platelet-derived growth factor, d polypeptide, Il15 - interleukin 15, Ar - androgen receptor, Emp2 - epithelial membrane protein 2, Areg - amphiregulin, Cd3e - cd3 antigen, epsilon polypeptide, Agtr1a - angiotensin ii receptor, type 1a, Ntrk2 - neurotrophic tyrosine kinase, receptor, type 2, Drd1a - dopamine receptor d1a, Tlr6 - toll-like receptor 6, Gcnt2 - glucosaminyl (n-acetyl) trans…
	GO:0007275	multicellular organism development	6e-07	1.68	1349	93	[Arc - activity regulated cytoskeletal-associated protein, Pdgfd - platelet-derived growth factor, d polypeptide, Ar - androgen receptor, Ikzf1 - ikaros family zinc finger 1, Jag2 - jagged 2, Esrrg - estrogen-related receptor gamma, Nes - nestin, Ntrk2 - neurotrophic tyrosine kinase, receptor, type 2, Rbpms2 - rna binding protein with multiple splicing 2, Cml1 - camello-like 1, Hils1 - histone h1…
	GO:0001934	positive regulation of protein phosphorylation	2.45e-05	1.68	972	67	[Pdgfd - platelet-derived growth factor, d polypeptide, Il15 - interleukin 15, Ar - androgen receptor, Emp2 - epithelial membrane protein 2, Areg - amphiregulin, Cd3e - cd3 antigen, epsilon polypeptide, Agtr1a - angiotensin ii receptor, type 1a, Ntrk2 - neurotrophic tyrosine kinase, receptor, type 2, Drd1a - dopamine receptor d1a, Tlr6 - toll-like receptor 6, Gcnt2 - glucosaminyl (n-acetyl) trans…
	GO:0048583	regulation of response to stimulus	7.43e-17	1.66	3517	240	[Rasal3 - ras protein activator like 3, Syt7 - synaptotagmin vii, Ntrk2 - neurotrophic tyrosine kinase, receptor, type 2, Abcc8 - atp-binding cassette, sub-family c (cftr/mrp), member 8, Peg10 - paternally expressed 10, Fcer1a - fc receptor, ige, high affinity i, alpha polypeptide, Pde5a - phosphodiesterase 5a, cgmp-specific, Ace - angiotensin i converting enzyme (peptidyl-dipeptidase a) 1, Spata…
	GO:1902531	regulation of intracellular signal transduction	7.87e-08	1.66	1629	111	[Rasal3 - ras protein activator like 3, Ar - androgen receptor, Ntrk2 - neurotrophic tyrosine kinase, receptor, type 2, Sez6l2 - seizure related 6 homolog like 2, Fcer1a - fc receptor, ige, high affinity i, alpha polypeptide, Gcnt2 - glucosaminyl (n-acetyl) transferase 2, i-branching enzyme, Nlrp6 - nlr family, pyrin domain containing 6, Hspb1 - heat shock protein 1, Pde5a - phosphodiesterase 5a,…
	GO:0080134	regulation of response to stress	3.96e-06	1.66	1199	82	[Penk - preproenkephalin, Il15 - interleukin 15, Mgll - monoglyceride lipase, Adamts12 - a disintegrin-like and metallopeptidase (reprolysin type) with thrombospondin type 1 motif, 12, Hamp - hepcidin antimicrobial peptide, Cd96 - cd96 antigen, Il1r1 - interleukin 1 receptor, type i, Abcc8 - atp-binding cassette, sub-family c (cftr/mrp), member 8, Il18rap - interleukin 18 receptor accessory prote…
	GO:0051707	response to other organism	0.000636	1.66	659	45	[Spon2 - spondin 2, extracellular matrix protein, Klra8 - killer cell lectin-like receptor, subfamily a, member 8, Ifnlr1 - interferon lambda receptor 1, Anxa3 - annexin a3, Oasl1 - 2'-5' oligoadenylate synthetase-like 1, Defb1 - defensin beta 1, Hamp - hepcidin antimicrobial peptide, Il31ra - interleukin 31 receptor a, Fgr - gardner-rasheed feline sarcoma viral (fgr) oncogene homolog, Cxcl11 - c…
	GO:0010562	positive regulation of phosphorus metabolic process	1.49e-05	1.65	1089	74	[Pdgfd - platelet-derived growth factor, d polypeptide, Il15 - interleukin 15, Ar - androgen receptor, Emp2 - epithelial membrane protein 2, Areg - amphiregulin, Cd3e - cd3 antigen, epsilon polypeptide, Agtr1a - angiotensin ii receptor, type 1a, Ntrk2 - neurotrophic tyrosine kinase, receptor, type 2, Drd1a - dopamine receptor d1a, Tlr6 - toll-like receptor 6, Gcnt2 - glucosaminyl (n-acetyl) trans…
	GO:0045937	positive regulation of phosphate metabolic process	1.49e-05	1.65	1089	74	[Pdgfd - platelet-derived growth factor, d polypeptide, Il15 - interleukin 15, Ar - androgen receptor, Emp2 - epithelial membrane protein 2, Areg - amphiregulin, Cd3e - cd3 antigen, epsilon polypeptide, Agtr1a - angiotensin ii receptor, type 1a, Ntrk2 - neurotrophic tyrosine kinase, receptor, type 2, Drd1a - dopamine receptor d1a, Tlr6 - toll-like receptor 6, Gcnt2 - glucosaminyl (n-acetyl) trans…
	GO:0040008	regulation of growth	0.000414	1.65	721	49	[Mgll - monoglyceride lipase, Ikzf1 - ikaros family zinc finger 1, Ar - androgen receptor, Arhgap4 - rho gtpase activating protein 4, Hepacam - hepatocyte cell adhesion molecule, Elane - elastase, neutrophil expressed, Hlx - h2.0-like homeobox, Sh3bp4 - sh3-domain binding protein 4, Nedd9 - neural precursor cell expressed, developmentally down-regulated gene 9, Acacb - acetyl-coenzyme a carboxyla…
	GO:0043408	regulation of MAPK cascade	0.000454	1.65	724	49	[Pdgfd - platelet-derived growth factor, d polypeptide, Ar - androgen receptor, Tbc1d10c - tbc1 domain family, member 10c, Ntrk2 - neurotrophic tyrosine kinase, receptor, type 2, Tlr6 - toll-like receptor 6, Fcer1a - fc receptor, ige, high affinity i, alpha polypeptide, Gcnt2 - glucosaminyl (n-acetyl) transferase 2, i-branching enzyme, Gpr37 - g protein-coupled receptor 37, Nlrp6 - nlr family, py…
	GO:0023056	positive regulation of signaling	4.34e-08	1.64	1764	119	[Arc - activity regulated cytoskeletal-associated protein, Ar - androgen receptor, Ntrk2 - neurotrophic tyrosine kinase, receptor, type 2, Drd1a - dopamine receptor d1a, Fcer1a - fc receptor, ige, high affinity i, alpha polypeptide, Gcnt2 - glucosaminyl (n-acetyl) transferase 2, i-branching enzyme, Pde5a - phosphodiesterase 5a, cgmp-specific, Lims2 - lim and senescent cell antigen like domains 2,…
	GO:0010647	positive regulation of cell communication	6.17e-08	1.63	1756	118	[Arc - activity regulated cytoskeletal-associated protein, Ar - androgen receptor, Ntrk2 - neurotrophic tyrosine kinase, receptor, type 2, Drd1a - dopamine receptor d1a, Fcer1a - fc receptor, ige, high affinity i, alpha polypeptide, Gcnt2 - glucosaminyl (n-acetyl) transferase 2, i-branching enzyme, Pde5a - phosphodiesterase 5a, cgmp-specific, Lims2 - lim and senescent cell antigen like domains 2,…
	GO:0045596	negative regulation of cell differentiation	0.000388	1.63	776	52	[Arhgap4 - rho gtpase activating protein 4, Adamts12 - a disintegrin-like and metallopeptidase (reprolysin type) with thrombospondin type 1 motif, 12, Fam101b - family with sequence similarity 101, member b, Areg - amphiregulin, Rbpms2 - rna binding protein with multiple splicing 2, Abcc8 - atp-binding cassette, sub-family c (cftr/mrp), member 8, Clec2i - c-type lectin domain family 2, member i, …
	GO:0090087	regulation of peptide transport	0.00072	1.63	701	47	[Glul - glutamate-ammonia ligase (glutamine synthetase), Vegfc - vascular endothelial growth factor c, Syt7 - synaptotagmin vii, Fam115c - family with sequence similarity 115, member c, Agtr1a - angiotensin ii receptor, type 1a, Abcc8 - atp-binding cassette, sub-family c (cftr/mrp), member 8, Fgr - gardner-rasheed feline sarcoma viral (fgr) oncogene homolog, Cadm1 - cell adhesion molecule 1, Apln…
	GO:0001932	regulation of protein phosphorylation	3.76e-06	1.62	1370	91	[Pdgfd - platelet-derived growth factor, d polypeptide, Il15 - interleukin 15, Ar - androgen receptor, Tbc1d10c - tbc1 domain family, member 10c, Emp2 - epithelial membrane protein 2, Areg - amphiregulin, Agtr1a - angiotensin ii receptor, type 1a, Cd3e - cd3 antigen, epsilon polypeptide, Ntrk2 - neurotrophic tyrosine kinase, receptor, type 2, Drd1a - dopamine receptor d1a, Tlr6 - toll-like recept…
	GO:0048513	animal organ development	4.77e-06	1.62	1320	88	[Sulf1 - sulfatase 1, Il15 - interleukin 15, Pcdh18 - protocadherin 18, Ar - androgen receptor, Ikzf1 - ikaros family zinc finger 1, Ovol1 - ovo homolog-like 1 (drosophila), Agtr1a - angiotensin ii receptor, type 1a, Tlx1 - t cell leukemia, homeobox 1, Peg10 - paternally expressed 10, Barx2 - barh-like homeobox 2, Hlx - h2.0-like homeobox, Ace - angiotensin i converting enzyme (peptidyl-dipeptida…
	GO:0043207	response to external biotic stimulus	0.000306	1.61	864	57	[Spon2 - spondin 2, extracellular matrix protein, Klra8 - killer cell lectin-like receptor, subfamily a, member 8, Hamp - hepcidin antimicrobial peptide, Cd96 - cd96 antigen, Cxcl11 - chemokine (c-x-c motif) ligand 11, Elane - elastase, neutrophil expressed, Rnase6 - ribonuclease, rnase a family, 6, Ly6a - lymphocyte antigen 6 complex, locus a, Tlr6 - toll-like receptor 6, Nlrp6 - nlr family, pyr…
	GO:0048585	negative regulation of response to stimulus	1.99e-06	1.6	1523	100	[Rasal3 - ras protein activator like 3, Ar - androgen receptor, Adamts12 - a disintegrin-like and metallopeptidase (reprolysin type) with thrombospondin type 1 motif, 12, Abcc8 - atp-binding cassette, sub-family c (cftr/mrp), member 8, Ntrk2 - neurotrophic tyrosine kinase, receptor, type 2, Peg10 - paternally expressed 10, Hk3 - hexokinase 3, Nlrp6 - nlr family, pyrin domain containing 6, Hspb1 -…
	GO:0022603	regulation of anatomical structure morphogenesis	7.5e-05	1.6	1047	69	[Sulf1 - sulfatase 1, Arc - activity regulated cytoskeletal-associated protein, Mgll - monoglyceride lipase, Ar - androgen receptor, Adamts12 - a disintegrin-like and metallopeptidase (reprolysin type) with thrombospondin type 1 motif, 12, Arhgap4 - rho gtpase activating protein 4, Emp2 - epithelial membrane protein 2, Agtr1a - angiotensin ii receptor, type 1a, Ntrk2 - neurotrophic tyrosine kinas…
	GO:0048869	cellular developmental process	8.54e-12	1.59	3019	197	[Ikzf1 - ikaros family zinc finger 1, Ptgs1 - prostaglandin-endoperoxide synthase 1, Ntrk2 - neurotrophic tyrosine kinase, receptor, type 2, Peg10 - paternally expressed 10, Tdrd12 - tudor domain containing 12, Retn - resistin, Odf4 - outer dense fiber of sperm tails 4, Nptx1 - neuronal pentraxin 1, Dclk1 - doublecortin-like kinase 1, Mir450b - microrna 450b, Nr1i2 - nuclear receptor subfamily 1,…
	GO:0009605	response to external stimulus	9.44e-06	1.58	1402	91	[Klra8 - killer cell lectin-like receptor, subfamily a, member 8, Spon2 - spondin 2, extracellular matrix protein, Penk - preproenkephalin, Pik3c2b - phosphoinositide-3-kinase, class 2, beta polypeptide, Hamp - hepcidin antimicrobial peptide, Cd96 - cd96 antigen, Cd3e - cd3 antigen, epsilon polypeptide, Cxcl11 - chemokine (c-x-c motif) ligand 11, Elane - elastase, neutrophil expressed, Rnase6 - r…
	GO:0009607	response to biotic stimulus	0.000414	1.58	894	58	[Spon2 - spondin 2, extracellular matrix protein, Klra8 - killer cell lectin-like receptor, subfamily a, member 8, Hamp - hepcidin antimicrobial peptide, Cd96 - cd96 antigen, Cxcl11 - chemokine (c-x-c motif) ligand 11, Elane - elastase, neutrophil expressed, Rnase6 - ribonuclease, rnase a family, 6, Ly6a - lymphocyte antigen 6 complex, locus a, Tlr6 - toll-like receptor 6, Nlrp6 - nlr family, pyr…
	GO:0065008	regulation of biological quality	9.11e-13	1.56	3489	224	[Ptgs1 - prostaglandin-endoperoxide synthase 1, Syt7 - synaptotagmin vii, Ntrk2 - neurotrophic tyrosine kinase, receptor, type 2, Abcc8 - atp-binding cassette, sub-family c (cftr/mrp), member 8, Slc12a5 - solute carrier family 12, member 5, Pde5a - phosphodiesterase 5a, cgmp-specific, Ace - angiotensin i converting enzyme (peptidyl-dipeptidase a) 1, Rdh9 - retinol dehydrogenase 9, Retn - resistin…
	GO:0042325	regulation of phosphorylation	9.56e-06	1.56	1481	95	[Pdgfd - platelet-derived growth factor, d polypeptide, Il15 - interleukin 15, Ar - androgen receptor, Tbc1d10c - tbc1 domain family, member 10c, Emp2 - epithelial membrane protein 2, Areg - amphiregulin, Agtr1a - angiotensin ii receptor, type 1a, Cd3e - cd3 antigen, epsilon polypeptide, Ntrk2 - neurotrophic tyrosine kinase, receptor, type 2, Drd1a - dopamine receptor d1a, Tlr6 - toll-like recept…
	GO:0051093	negative regulation of developmental process	0.000258	1.55	1033	66	[Sulf1 - sulfatase 1, Adamts12 - a disintegrin-like and metallopeptidase (reprolysin type) with thrombospondin type 1 motif, 12, Arhgap4 - rho gtpase activating protein 4, Fam101b - family with sequence similarity 101, member b, Areg - amphiregulin, Abcc8 - atp-binding cassette, sub-family c (cftr/mrp), member 8, Rbpms2 - rna binding protein with multiple splicing 2, Clec2i - c-type lectin domain…
	GO:0010646	regulation of cell communication	5.58e-10	1.52	3146	196	[Rasal3 - ras protein activator like 3, Ptgs1 - prostaglandin-endoperoxide synthase 1, Syt7 - synaptotagmin vii, Ntrk2 - neurotrophic tyrosine kinase, receptor, type 2, Abcc8 - atp-binding cassette, sub-family c (cftr/mrp), member 8, Pcdh17 - protocadherin 17, Peg10 - paternally expressed 10, Fcer1a - fc receptor, ige, high affinity i, alpha polypeptide, Pde5a - phosphodiesterase 5a, cgmp-specifi…
	GO:0051960	regulation of nervous system development	0.000627	1.52	1008	63	[Arc - activity regulated cytoskeletal-associated protein, Mgll - monoglyceride lipase, Arhgap4 - rho gtpase activating protein 4, Fez1 - fasciculation and elongation protein zeta 1 (zygin i), Il1r1 - interleukin 1 receptor, type i, Ntrk2 - neurotrophic tyrosine kinase, receptor, type 2, Abcc8 - atp-binding cassette, sub-family c (cftr/mrp), member 8, P2ry2 - purinergic receptor p2y, g-protein co…
	GO:0023051	regulation of signaling	9.23e-10	1.51	3165	196	[Rasal3 - ras protein activator like 3, Ptgs1 - prostaglandin-endoperoxide synthase 1, Syt7 - synaptotagmin vii, Ntrk2 - neurotrophic tyrosine kinase, receptor, type 2, Abcc8 - atp-binding cassette, sub-family c (cftr/mrp), member 8, Pcdh17 - protocadherin 17, Peg10 - paternally expressed 10, Fcer1a - fc receptor, ige, high affinity i, alpha polypeptide, Pde5a - phosphodiesterase 5a, cgmp-specifi…
	GO:0009966	regulation of signal transduction	2.87e-08	1.51	2643	164	[Rasal3 - ras protein activator like 3, Arc - activity regulated cytoskeletal-associated protein, Ar - androgen receptor, Adamts12 - a disintegrin-like and metallopeptidase (reprolysin type) with thrombospondin type 1 motif, 12, Ntrk2 - neurotrophic tyrosine kinase, receptor, type 2, Sez6l2 - seizure related 6 homolog like 2, Peg10 - paternally expressed 10, Fcer1a - fc receptor, ige, high affini…
	GO:0044093	positive regulation of molecular function	7.23e-05	1.51	1420	88	[Pdgfd - platelet-derived growth factor, d polypeptide, Arc - activity regulated cytoskeletal-associated protein, Ar - androgen receptor, Tbc1d10c - tbc1 domain family, member 10c, Emp2 - epithelial membrane protein 2, Gpr65 - g-protein coupled receptor 65, Agtr1a - angiotensin ii receptor, type 1a, Kcnc2 - potassium voltage gated channel, shaw-related subfamily, member 2, Ntrk2 - neurotrophic ty…
	GO:0048518	positive regulation of biological process	1.06e-18	1.5	5709	352	[Rasal3 - ras protein activator like 3, Apbb1ip - amyloid beta (a4) precursor protein-binding, family b, member 1 interacting protein, Ikzf1 - ikaros family zinc finger 1, Akna - at-hook transcription factor, Ikzf3 - ikaros family zinc finger 3, Ptgs1 - prostaglandin-endoperoxide synthase 1, Abcc8 - atp-binding cassette, sub-family c (cftr/mrp), member 8, Ntrk2 - neurotrophic tyrosine kinase, rec…
	GO:0031401	positive regulation of protein modification process	0.000492	1.49	1178	72	[Pdgfd - platelet-derived growth factor, d polypeptide, Il15 - interleukin 15, Ar - androgen receptor, Emp2 - epithelial membrane protein 2, Areg - amphiregulin, Cd3e - cd3 antigen, epsilon polypeptide, Agtr1a - angiotensin ii receptor, type 1a, Ntrk2 - neurotrophic tyrosine kinase, receptor, type 2, Drd1a - dopamine receptor d1a, Tlr6 - toll-like receptor 6, Gcnt2 - glucosaminyl (n-acetyl) trans…
	GO:0060284	regulation of cell development	0.000931	1.49	1044	64	[Arc - activity regulated cytoskeletal-associated protein, Mgll - monoglyceride lipase, Arhgap4 - rho gtpase activating protein 4, Fam101b - family with sequence similarity 101, member b, Fez1 - fasciculation and elongation protein zeta 1 (zygin i), Il1r1 - interleukin 1 receptor, type i, Abcc8 - atp-binding cassette, sub-family c (cftr/mrp), member 8, Ntrk2 - neurotrophic tyrosine kinase, recept…
	GO:0019220	regulation of phosphate metabolic process	4.49e-05	1.48	1642	100	[Ar - androgen receptor, Areg - amphiregulin, Ntrk2 - neurotrophic tyrosine kinase, receptor, type 2, Drd1a - dopamine receptor d1a, Fcer1a - fc receptor, ige, high affinity i, alpha polypeptide, Gcnt2 - glucosaminyl (n-acetyl) transferase 2, i-branching enzyme, Nlrp6 - nlr family, pyrin domain containing 6, Hspb1 - heat shock protein 1, Pde5a - phosphodiesterase 5a, cgmp-specific, Ace - angioten…
	GO:0051174	regulation of phosphorus metabolic process	4.6e-05	1.48	1643	100	[Ar - androgen receptor, Areg - amphiregulin, Ntrk2 - neurotrophic tyrosine kinase, receptor, type 2, Drd1a - dopamine receptor d1a, Fcer1a - fc receptor, ige, high affinity i, alpha polypeptide, Gcnt2 - glucosaminyl (n-acetyl) transferase 2, i-branching enzyme, Nlrp6 - nlr family, pyrin domain containing 6, Hspb1 - heat shock protein 1, Pde5a - phosphodiesterase 5a, cgmp-specific, Ace - angioten…
	GO:0010648	negative regulation of cell communication	0.000315	1.48	1280	78	[Sulf1 - sulfatase 1, Rasal3 - ras protein activator like 3, Mgll - monoglyceride lipase, Ar - androgen receptor, Adamts12 - a disintegrin-like and metallopeptidase (reprolysin type) with thrombospondin type 1 motif, 12, Tbc1d10c - tbc1 domain family, member 10c, Ptgs1 - prostaglandin-endoperoxide synthase 1, Cd3e - cd3 antigen, epsilon polypeptide, Ntrk2 - neurotrophic tyrosine kinase, receptor,…
	GO:0023057	negative regulation of signaling	0.000346	1.48	1284	78	[Sulf1 - sulfatase 1, Rasal3 - ras protein activator like 3, Mgll - monoglyceride lipase, Ar - androgen receptor, Adamts12 - a disintegrin-like and metallopeptidase (reprolysin type) with thrombospondin type 1 motif, 12, Tbc1d10c - tbc1 domain family, member 10c, Ptgs1 - prostaglandin-endoperoxide synthase 1, Cd3e - cd3 antigen, epsilon polypeptide, Ntrk2 - neurotrophic tyrosine kinase, receptor,…
	GO:0032502	developmental process	1.39e-13	1.47	4840	292	[Ikzf1 - ikaros family zinc finger 1, Ptgs1 - prostaglandin-endoperoxide synthase 1, Rbpms2 - rna binding protein with multiple splicing 2, Ntrk2 - neurotrophic tyrosine kinase, receptor, type 2, Slc12a5 - solute carrier family 12, member 5, Peg10 - paternally expressed 10, Cml1 - camello-like 1, Ace - angiotensin i converting enzyme (peptidyl-dipeptidase a) 1, Tdrd12 - tudor domain containing 12…
	GO:0048856	anatomical structure development	8.68e-09	1.46	3337	200	[Ikzf1 - ikaros family zinc finger 1, Ntrk2 - neurotrophic tyrosine kinase, receptor, type 2, Rbpms2 - rna binding protein with multiple splicing 2, Slc12a5 - solute carrier family 12, member 5, Peg10 - paternally expressed 10, Cml1 - camello-like 1, Ace - angiotensin i converting enzyme (peptidyl-dipeptidase a) 1, Tdrd12 - tudor domain containing 12, H2-DMa - histocompatibility 2, class ii, locu…
	GO:0048522	positive regulation of cellular process	1.19e-13	1.45	5091	304	[Rasal3 - ras protein activator like 3, Ikzf1 - ikaros family zinc finger 1, Akna - at-hook transcription factor, Ikzf3 - ikaros family zinc finger 3, Abcc8 - atp-binding cassette, sub-family c (cftr/mrp), member 8, Ntrk2 - neurotrophic tyrosine kinase, receptor, type 2, Fcer1a - fc receptor, ige, high affinity i, alpha polypeptide, Pde5a - phosphodiesterase 5a, cgmp-specific, Ace - angiotensin i…
	GO:0051247	positive regulation of protein metabolic process	0.000216	1.44	1589	94	[Pdgfd - platelet-derived growth factor, d polypeptide, Il15 - interleukin 15, Ar - androgen receptor, Lonrf3 - lon peptidase n-terminal domain and ring finger 3, Hamp - hepcidin antimicrobial peptide, Emp2 - epithelial membrane protein 2, Areg - amphiregulin, Cd3e - cd3 antigen, epsilon polypeptide, Agtr1a - angiotensin ii receptor, type 1a, Ntrk2 - neurotrophic tyrosine kinase, receptor, type 2…
	GO:0035556	intracellular signal transduction	0.000802	1.44	1301	77	[Pik3c2b - phosphoinositide-3-kinase, class 2, beta polypeptide, Arhgdig - rho gdp dissociation inhibitor (gdi) gamma, Hamp - hepcidin antimicrobial peptide, Gpr65 - g-protein coupled receptor 65, Agtr1a - angiotensin ii receptor, type 1a, Kcnc2 - potassium voltage gated channel, shaw-related subfamily, member 2, Ntrk2 - neurotrophic tyrosine kinase, receptor, type 2, Rab15 - rab15, member ras on…
	GO:0050896	response to stimulus	8.64e-11	1.4	4928	284	[Ptgs1 - prostaglandin-endoperoxide synthase 1, Abcc8 - atp-binding cassette, sub-family c (cftr/mrp), member 8, Ntrk2 - neurotrophic tyrosine kinase, receptor, type 2, Slc12a5 - solute carrier family 12, member 5, Adam23 - a disintegrin and metallopeptidase domain 23, Ace - angiotensin i converting enzyme (peptidyl-dipeptidase a) 1, Retn - resistin, Car3 - carbonic anhydrase 3, Bank1 - b cell sc…
	GO:0031399	regulation of protein modification process	0.000496	1.39	1712	98	[Ar - androgen receptor, Areg - amphiregulin, Ntrk2 - neurotrophic tyrosine kinase, receptor, type 2, Drd1a - dopamine receptor d1a, Fcer1a - fc receptor, ige, high affinity i, alpha polypeptide, Gcnt2 - glucosaminyl (n-acetyl) transferase 2, i-branching enzyme, Nlrp6 - nlr family, pyrin domain containing 6, Hspb1 - heat shock protein 1, Pde5a - phosphodiesterase 5a, cgmp-specific, Ace - angioten…
	GO:0006950	response to stress	4.22e-05	1.37	2595	146	[Penk - preproenkephalin, Ptgs1 - prostaglandin-endoperoxide synthase 1, Slc12a5 - solute carrier family 12, member 5, Elane - elastase, neutrophil expressed, Drd1a - dopamine receptor d1a, Hspb1 - heat shock protein 1, Nlrp6 - nlr family, pyrin domain containing 6, Rtp4 - receptor transporter protein 4, Uchl1 - ubiquitin carboxy-terminal hydrolase l1, Car3 - carbonic anhydrase 3, Gcgr - glucagon…
	GO:0048519	negative regulation of biological process	4.94e-09	1.36	5027	280	[Rasal3 - ras protein activator like 3, Papln - papilin, proteoglycan-like sulfated glycoprotein, Ikzf1 - ikaros family zinc finger 1, Ptgs1 - prostaglandin-endoperoxide synthase 1, Rbpms2 - rna binding protein with multiple splicing 2, Abcc8 - atp-binding cassette, sub-family c (cftr/mrp), member 8, Ntrk2 - neurotrophic tyrosine kinase, receptor, type 2, Pcdh17 - protocadherin 17, Peg10 - patern…
	GO:0065009	regulation of molecular function	0.000131	1.36	2422	135	[Rasal3 - ras protein activator like 3, Arc - activity regulated cytoskeletal-associated protein, Papln - papilin, proteoglycan-like sulfated glycoprotein, Ar - androgen receptor, Ntrk2 - neurotrophic tyrosine kinase, receptor, type 2, Abcc8 - atp-binding cassette, sub-family c (cftr/mrp), member 8, Drd1a - dopamine receptor d1a, Fcer1a - fc receptor, ige, high affinity i, alpha polypeptide, Arap…
	GO:0007165	signal transduction	4.6e-08	1.35	4568	254	[Rasal3 - ras protein activator like 3, Apbb1ip - amyloid beta (a4) precursor protein-binding, family b, member 1 interacting protein, Tspan13 - tetraspanin 13, Ntrk2 - neurotrophic tyrosine kinase, receptor, type 2, Fcer1a - fc receptor, ige, high affinity i, alpha polypeptide, Pde5a - phosphodiesterase 5a, cgmp-specific, Spata13 - spermatogenesis associated 13, Car2 - carbonic anhydrase 2, Ptgd…
	GO:0048523	negative regulation of cellular process	5.41e-07	1.32	4500	245	[Rasal3 - ras protein activator like 3, Papln - papilin, proteoglycan-like sulfated glycoprotein, Ikzf1 - ikaros family zinc finger 1, Ptgs1 - prostaglandin-endoperoxide synthase 1, Rbpms2 - rna binding protein with multiple splicing 2, Ntrk2 - neurotrophic tyrosine kinase, receptor, type 2, Abcc8 - atp-binding cassette, sub-family c (cftr/mrp), member 8, Pcdh17 - protocadherin 17, Peg10 - patern…
	GO:0010604	positive regulation of macromolecule metabolic process	0.000138	1.31	3071	165	[Ikzf1 - ikaros family zinc finger 1, Ar - androgen receptor, Akna - at-hook transcription factor, Ikzf3 - ikaros family zinc finger 3, Areg - amphiregulin, Esrrg - estrogen-related receptor gamma, Ntrk2 - neurotrophic tyrosine kinase, receptor, type 2, Cyp3a13 - cytochrome p450, family 3, subfamily a, polypeptide 13, Elane - elastase, neutrophil expressed, Cml1 - camello-like 1, Drd1a - dopamine…
	GO:0051173	positive regulation of nitrogen compound metabolic process	0.000158	1.31	2927	158	[Ar - androgen receptor, Akna - at-hook transcription factor, Ikzf1 - ikaros family zinc finger 1, Ikzf3 - ikaros family zinc finger 3, Areg - amphiregulin, Esrrg - estrogen-related receptor gamma, Ntrk2 - neurotrophic tyrosine kinase, receptor, type 2, Elane - elastase, neutrophil expressed, Drd1a - dopamine receptor d1a, Fcer1a - fc receptor, ige, high affinity i, alpha polypeptide, Gcnt2 - glu…
[truncated: 58 more rows]

## Sheet: D-LEC only
	Table S3: Enriched GO terms in D-LEC 5X-DEG
[truncated: 176 more rows]

[truncated: 2 more sheets: LN-LEC+LN-BEC, LN-LEC+D-LEC]
