# Supplementary material for: Comparative Transcriptomic Analysis Identifies a Range of Immunologically Related Functional Elaborations of Lymph Node Associated Lymphatic and Blood Endothelial Cells
Source: Front Immunol. 2019 Apr 16;10:816. doi: 10.3389/fimmu.2019.00816 (PMC6478037; doi:10.3389/fimmu.2019.00816)
Supplement: Supplementary file 4 [file Table_4.xlsx]

## Sheet: Table S4 LN-LEC
Table S4. Total number of 190 5X-DEGs in LN-LEC subset with average FPKM < 343.
				LN-LEC v D-LEC		LN-LEC v LN-BEC
5X-DEG (190 genes)	Average FPKM LN-LEC	Average FPKM LN-BEC	Average FPKM D-LEC	P-adjusted	Log2 FC	P-adjusted	Log2 FC
Tyr (previously observed PTA)	342.83	19.4086	8.80104	1.63e-43	5.11	7.02e-28	4.09
Slc16a7	345.338	73.6223	60.4435	1.19e-34	2.49	4.18e-11	2.22
Ccdc122	333.46	135.817	43.1518	9.09e-47	2.93	1.59e-15	1.33
Tmem132c	323.575	19.5423	5.05043	1.4e-47	5.83	3.89e-35	3.99
Igdcc4	321.904	55.871	39.7875	1.35e-24	3.01	1.61e-20	2.53
Arhgef10l	310.613	90.3049	20.1567	4.36e-48	3.89	1.29e-07	1.79
Crygn	302.785	9.87817	4.55442	4.23e-47	5.92	9.7e-55	4.85
Carns1	286.879	140.318	52.5719	5.65e-27	2.46	1.92e-09	1.06
Olig2	283.77	4.73472	0.838563	1.52e-30	7.64	1.68e-49	5.81
Abtb2	273.264	51.0608	12.1553	1.9e-44	4.44	1.95e-21	2.44
Serp2	273.133	40.5605	37.6105	4.78e-40	2.85	3.1e-40	2.77
Clca2	270.33	53.3311	7.95568	9.09e-51	4.9	2.91e-36	2.37
Otos	265.742	47.2064	20.3993	5.43e-36	3.67	1.17e-12	2.46
Meis3	258.62	38.8927	5.18863	2.85e-44	5.53	1.45e-24	2.74
Slc2a12	256.631	107.289	22.2095	3.44e-38	3.51	3e-09	1.29
Ptges	254.91	74.8877	35.8062	1.03e-32	2.82	5.61e-09	1.77
Serpina12	252.829	11.1378	0.274288	2.93e-26	7.84	2.18e-40	4.47
Plbd1	245.543	111.004	44.1536	4.98e-17	2.44	7.17e-08	1.17
Xlr5b	243.626	7.35066	0	7.21e-23	8.19	1.37e-30	4.92
Fam171b	216.716	27.6472	14.6536	3.65e-32	3.88	3.31e-20	2.94
Sh2d4a	216.57	81.3582	19.4505	1.82e-35	3.42	0.000211	1.42
Xlr5a	215.979	6.46168	0	4.39e-22	8.07	2.67e-31	4.95
Dbx2	203.398	3.43738	0	1.23e-21	8.01	1.77e-34	5.71
Glis1	197.387	5.15488	25.1529	3.91e-28	2.96	1.44e-31	5.14
Skor1	196.176	38.799	4.5561	4.89e-37	5.15	7.26e-19	2.33
Tmem221	194.009	60.5527	25.0397	3.94e-26	2.9	6.23e-14	1.69
Larp6	178.705	24.2136	12.5784	7.34e-34	3.77	1.78e-21	2.87
Ptpn20	176.36	5.92857	4.0338	5.45e-34	5.18	8.76e-07	4.06
Folh1	175.502	6.33784	7.90524	6.26e-28	4.31	5.14e-28	4.68
Cpa2	174.111	67.7503	12.8421	4.78e-25	3.7	0.259	1.15
Xlr5c	163.998	4.21107	0	2.4e-19	7.69	6.35e-06	4.1
Tmem132b	156.693	1.95428	2.86159	2.38e-25	5.31	4.97e-26	5.87
Zfp92	147.21	6.22254	0	2.05e-18	7.55	1.78e-06	3.85
Ppp1r26	142.977	19.6988	2.14007	8.47e-26	5.75	1.81e-18	2.85
Armcx6	138.205	78.2916	23.2677	3.93e-20	2.56	0.000237	0.863
Mab21l3	137.962	2.83854	0.274288	4.99e-20	7.04	1.89e-28	5.32
Ppef2	130.762	21.9928	20.6299	3.25e-20	2.67	2.09e-20	2.56
Rab30	130.522	34.0747	15.2946	5.02e-22	3.11	2.03e-09	1.92
Adssl1	127.41	21.4493	10.1394	3.44e-23	3.5	1.38e-17	2.56
Hs3st5	120.983	4.61561	0	2.19e-17	7.36	2.56e-25	4.58
Prokr1	119.322	7.76321	7.28292	7.48e-18	3.91	1.09e-12	3.72
Klhl32	116.252	10.5186	5.06781	1.96e-21	4.29	1.69e-19	3.38
Slc43a1	115.862	67.1117	20.3416	1.67e-16	2.47	0.00157	0.809
Fam163a	108.512	15.0873	9.133	8.62e-17	3.47	2.03e-11	2.76
Hs6st2	101.456	14.2561	6.18957	1.16e-20	3.94	6.66e-14	2.8
Zfp618	101.417	11.3141	28.4474	1.69e-09	1.82	1.88e-12	3.1
Tram1l1	96.0057	11.3495	26.9865	1.61e-07	1.81	9.45e-18	3.04
Spns3	88.8215	18.0748	8.58822	1.9e-16	3.27	1.1e-10	2.25
Dcaf12l2	85.4275	14.5949	1.38714	7.75e-18	5.45	3.64e-13	2.51
Dnahc1	80.7706	15.8412	7.0612	8.56e-16	3.46	1.44e-10	2.33
Klhl35	78.8359	14.0084	22.929	7.28e-06	1.79	5.39e-12	2.47
Ccdc81	78.6253	8.64511	25.7486	2e-06	1.62	3.83e-12	3.07
Susd1	76.3692	66.9197	12.8823	9.39e-08	2.43	0.617	0.227
Cdkl4	75.6237	9.33325	5.91695	3.98e-14	3.47	2.66e-12	2.93
Rab38	70.2679	11.9648	37.0623	0.0308	0.899	2.46e-07	2.48
Elavl2	68.6672	5.32357	0.548577	7.5e-14	5.69	1.26e-12	3.51
Ccdc37	67.2996	18.3192	4.79352	9.8e-14	3.6	6.67e-07	1.86
Odz4	63.8215	5.98432	21.4002	1.16e-05	1.57	2.47e-11	3.31
Fsd2	59.3529	3.94777	16.3252	3.46e-06	1.81	1.49e-11	3.65
Olfr98	57.664	3.49693	0.667287	2.56e-12	5.42	2.38e-08	3.71
Spnb1	57.5721	9.16785	28.4508	0.0144	1.03	9.38e-09	2.59
Art2b	56.5833	1.71987	0	3.74e-12	6.4	8.5e-14	4.65
Hsd17b14	53.5298	3.79563	6.96877	1.19e-07	2.83	1.13e-07	3.51
Stfa3	53.3267	7.94714	3.02908	1.38e-10	3.86	0.000541	2.5
Gstm6	52.9614	7.76611	4.26443	8.61e-12	3.45	5.05e-06	2.64
Pknox2	51.579	37.6842	9.49293	6.32e-07	2.37	0.316	0.486
Wdr69	51.4338	1.7638	9.26062	2.34e-08	2.46	2.28e-12	4.35
Ido2	49.3908	4.53806	0	5.47e-11	6.17	1.12e-07	3.17
Tmem63c	48.9036	3.08149	1.49015	1.95e-12	4.48	3.71e-11	3.79
Gpr25	46.7428	1.36398	0.548577	2.31e-11	5.21	8.64e-12	4.59
Pygo1	46.4983	3.24926	6.45874	4.01e-07	2.67	3.84e-10	3.6
Zfp872	45.3824	13.8156	5.9136	2.58e-06	2.85	0.000511	1.67
Rps6ka6	44.9032	22.62	4.78673	1.11e-09	3.06	0.0475	0.99
Serpina3b	44.7984	1.06766	0	8.38e-11	6.1	1.19e-11	4.78
Enox1	44.4394	11.6018	7.55933	9.78e-06	2.47	5.04e-05	1.9
Aldh1b1	44.0359	3.65616	2.82473	5.53e-09	3.6	1.95e-08	3.3
Sgcz	42.1463	1.88764	0	1.96e-10	6.02	1.52e-10	4.06
Palm3	40.8947	12.0026	4.90544	2.43e-08	2.89	0.000161	1.71
Lin28b	40.4868	3.55268	0	1.51e-09	5.85	6.83e-07	3.21
Glyatl3	39.7801	14.4357	4.80243	2.44e-08	2.93	0.00132	1.45
Mmp27	39.241	6.80521	0.667287	2.81e-10	4.95	1.53e-06	2.41
Zfp385c	39.0506	6.39122	21.0051	0.0684	0.871	1.12e-06	2.51
Ccdc96	38.9465	6.79104	3.80828	1.02e-08	3.2	5.93e-07	2.41
Dcaf12l1	38.816	19.6174	6.76442	1.34e-05	2.41	0.0403	0.986
Rfx8	38.5892	6.10053	10.0415	4.09e-05	1.88	3.72e-05	2.47
Actr3b	38.5464	19.1315	4.23304	9.6e-06	2.84	0.0639	0.981
Mum1l1	37.9454	8.26705	6.65929	1.04e-06	2.41	9.61e-05	2.11
Defb25	35.9055	5.03577	18.1422	0.0299	0.969	4.51e-06	2.7
Adam32	35.2369	27.6495	5.60959	2.36e-06	2.48	0.464	0.366
Fhod3	33.3186	22.4456	4.33437	2.6e-05	2.69	0.386	0.582
Tmem151b	32.1151	3.42175	0.941576	6.91e-09	4.36	6.55e-07	2.99
Rab36	31.3104	3.08004	14.6832	0.0391	1.04	3.03e-06	3.03
Serpina11	30.8178	0	0	1.26e-08	5.58	3.08e-09	5.43
Phex	30.3701	12.6831	3.22663	1.61e-05	3.01	0.195	1.14
Fmo6	29.0643	7.70419	4.43739	5.39e-05	2.45	0.00492	1.82
Nup62cl	28.3213	0.649852	0	2.62e-08	5.49	2.49e-08	4.44
Myadml2	28.2974	3.42648	6.6279	0.00306	1.9	3.53e-06	2.82
Olig1	28.0111	1.42354	0	3.27e-08	5.46	1.1e-06	3.75
Nxph2	27.8265	3.55885	0.333644	3.97e-08	4.9	0.00264	2.55
Exd1	27.1673	14.594	4.67992	0.000927	2.34	0.165	0.868
Mir1942	26.6782	17.5473	3.08164	4.08e-06	2.9	0.351	0.585
Hs6st3	26.2584	0.8819	0	5.46e-08	5.39	2.47e-07	4.02
Ces2f	26.0014	3.96431	0	6.48e-08	5.38	0.000128	2.47
Agbl2	25.3917	3.35983	6.99126	0.0106	1.78	0.000424	2.6
Olfr1420	24.5092	20.3216	4.10886	0.000252	2.39	0.729	0.27
Tal2	23.3128	1.65795	1.4308	4.06e-06	3.43	2.09e-06	3.4
Aipl1	22.4024	17.8701	3.85027	0.00155	2.37	0.624	0.347
Snord15b	21.4944	9.19996	1.42021	5.48e-06	3.49	0.0908	1.16
Olfr518	21.0279	0	0	4.92e-07	5.11	1.84e-07	4.96
Gpr85	20.8434	1.06766	1.51644	3.17e-05	3.24	9.73e-06	3.63
Kcnh3	19.9945	4.26681	2.08071	5.69e-05	2.96	0.00248	2.07
Acsl6	19.683	3.13724	0.274288	5.17e-06	4.38	0.0018	2.37
Ppp1r14c	19.4396	0.943819	1.51644	0.000102	3.14	1.49e-05	3.59
Slc13a4	19.3704	0.592659	2.06501	0.000454	2.77	5.63e-06	3.9
Lyz1	18.7603	3.07532	1.63515	7e-05	3.09	0.000942	2.35
Nat1	18.3679	1.5984	1.88315	0.000172	2.86	3.78e-05	3.08
Gp2	18.2177	34.257	0	3.99e-05	4.51	0.773	-0.458
Mir3058	17.6958	2.77426	6.18066	0.0373	1.4	0.00108	2.38
Odf3l1	17.5989	3.19443	0.333644	6.17e-06	4.27	0.00126	2.24
Serpinb11	17.1938	20.9972	1.38714	0.00964	2.76	0.955	-0.0996
Dlec1	16.2822	8.75622	1.51644	0.000391	2.91	0.223	0.888
Padi3	15.817	0.355885	0	6.17e-06	4.74	1.2e-05	4.02
Best3	15.3806	4.97149	1.25785	0.000455	3.15	0.0614	1.49
Gbp1	15.0234	2.0162	0.333644	7.01e-05	3.95	0.00594	2.43
Ccdc63	14.8457	1.65795	4.60487	0.0512	1.51	0.00128	2.69
Pabpc5	14.344	2.6065	0.274288	3.41e-05	4.03	0.00408	2.2
Padi1	13.6725	1.53175	0	1.74e-05	4.57	0.00205	2.63
Zfp385b	12.5863	2.12205	1.36086	0.00125	2.75	0.00803	2.19
Olfr985	12.3805	0	0	5.92e-05	4.37	4.33e-05	4.19
Dnahc11	12.1269	5.6809	0.548577	0.000581	3.32	0.291	0.99
P2ry13	11.7058	5.32974	0.667287	0.000796	3.24	0.229	1.06
Eya4	11.2151	2.60413	0.419282	0.000526	3.57	0.0362	1.85
Acsm5	10.6257	1.71751	0	8.88e-05	4.27	0.0133	2.24
Tas1r1	10.5901	2.4912	0.274288	0.000828	3.52	0.155	1.6
Ccdc113	10.4041	1.18295	0	0.000264	4.08	0.0153	2.39
Fam83c	10.2671	5.31648	0.333644	0.000476	3.56	0.278	0.889
Rimkla	9.88009	2.35173	0.333644	0.000686	3.49	0.131	1.6
Fam154b	9.62474	0.943819	4.18558	0.227	1.05	0.00441	2.65
Lrrc8e	9.60124	2.54458	1.11285	0.00619	2.62	0.0501	1.69
Frmpd1	9.47453	5.87138	1.36086	0.0106	2.37	0.604	0.621
Mir218-1	9.14013	2.84708	0	0.000271	4.06	0.24	1.34
Kcnh4	8.99632	8.39035	0.88222	0.00933	2.57	0.939	0.0918
Akr1c12	8.5491	3.90239	0.333644	0.00199	3.28	0.316	0.97
Astn2	8.43969	1.71987	0	0.000504	3.93	0.0602	1.87
Zfp114	8.38768	2.84091	0.88222	0.0096	2.52	0.121	1.37
Mrgprx2	8.34587	0	0	0.000565	3.9	0.000466	3.73
Ms4a7	8.21201	4.53334	0	0.000673	3.87	0.558	0.709
Chst10	8.1537	2.12677	0.967858	0.0184	2.42	0.097	1.62
Opn1mw	7.96833	1.48165	0.274288	0.00885	3	0.192	1.6
Mir3067	7.71242	0.296329	0.752925	0.00842	2.68	0.00254	3.1
Usp51	7.39835	4.61888	0.333644	0.00783	2.97	0.629	0.56
Fgl1	7.29304	0.649852	1.70509	0.125	1.63	0.0169	2.52
Cfhr2	7.14907	0.652215	3.67388	0.43	0.804	0.0182	2.49
Mei4	6.90229	0.948544	0	0.00168	3.64	0.0377	2.15
Ppp1r17	6.84206	0	0	0.00866	3.21	0.0137	2.9
Elfn2	6.7286	1.65795	0.752925	0.026	2.41	0.124	1.61
Tmem169	6.72595	2.70762	0.333644	0.012	2.86	0.419	0.996
Odz2	6.62213	2.43164	0.274288	0.00666	2.99	0.292	1.18
Dydc1	6.56207	0.71177	0	0.00285	3.52	0.0451	2.24
Miox	6.52132	0.590296	2.80735	0.313	1.05	0.0283	2.38
Olfr519	6.38658	0	0	0.00563	3.33	0.0069	3.1
Tmem90a	6.30608	0.355885	0	0.00246	3.55	0.011	2.76
Cd300c	6.12106	1.89709	0	0.00502	3.36	0.288	1.25
Olfr960	6.08423	0	0	0.00406	3.42	0.0045	3.21
Lrriq1	5.80751	2.19105	0	0.006	3.31	0.342	1.09
Tgm5	5.78786	0	0.333644	0.0168	2.73	0.00402	3.24
Dusp15	5.69363	3.12542	0	0.00795	3.23	0.618	0.668
Slc17a4	5.49777	0	1.09715	0.174	1.61	0.0074	3.07
Trim30e-ps1	5.49464	0.884263	0	0.00513	3.34	0.0875	1.88
Qprt	5.43696	2.42074	0.419282	0.0213	2.63	0.367	0.971
Scarna13	5.43258	5.4937	0.333644	0.0234	2.62	0.987	-0.0193
Cyp4a31	5.05678	0	0.88222	0.154	1.72	0.021	2.75
Ccdc151	5.0342	0.293967	2.24308	0.392	0.942	0.0313	2.46
Dgkk	5.02801	0	0.667287	0.179	1.74	0.0438	2.47
Oxct2a	4.90922	0	0	0.0075	3.23	0.00788	3.05
Ascl2	4.86869	4.50358	0.333644	0.0348	2.5	0.898	0.174
Ccdc158	4.86066	0	0	0.022	2.88	0.0309	2.61
Spata22	4.80854	0.293967	3.28088	0.719	0.42	0.0334	2.43
Lrguk	4.74958	0	0.667287	0.156	1.8	0.0295	2.62
Rem2	4.70218	5.13781	0.274288	0.0317	2.52	0.935	-0.105
Ano3	4.68198	0.592659	0	0.00953	3.15	0.0948	1.95
Vmn2r19	4.67114	0	0	0.0106	3.12	0.0117	2.93
Kif6	4.59515	0	0.838563	0.116	1.85	0.0103	2.97
Nphs2	4.09079	0	1.37144	0.473	0.984	0.0445	2.46
Fam19a1	4.00857	3.97139	0	0.037	2.66	0.996	0.00821
Fut1	3.79888	0.71177	0	0.0202	2.89	0.191	1.61
Ccdc155	3.52332	0	4.0181	0.891	-0.184	0.0262	2.66
Olfr658	3.19897	0.355885	0	0.0345	2.68	0.13	1.87
Has2as	3.03426	0.355885	0	0.0399	2.62	0.148	1.82
Synb	2.92341	0	0.69357	0.253	1.45	0.0461	2.44

## Sheet: Table S4 D-LEC
Table S4. Total number of 132 5X-DEGs in D-LEC subset with average FPKM < 343.
				LN-LEC v D-LEC		D-LEC v LN-BEC
5X-DEG (132 genes)	Average FPKM LN-LEC	Average FPKM LN-BEC	Average FPKM D-LEC	P-adjusted	Log2 FC	P-adjusted	Log2 FC
Lrrc3	193.531	41.4562	340.243	0.000375	-0.787	2.93e-26	3.04
Ccdc146	163.178	52.3361	339.34	5.34e-05	-1.04	4.1e-15	2.68
Spsb4	83.4682	27.5139	311.938	1.37e-21	-1.86	5.09e-33	3.49
Snx24	142.677	48.9553	297.735	4.77e-09	-1.04	1.92e-18	2.61
Klrb1c	0.630918	5.72811	287.448	6.88e-36	-7.74	1.01e-44	5.52
Tiam2	133.441	32.8814	259.787	5.76e-07	-0.945	2.54e-28	2.98
Sec16b	75.4157	47.4268	239.759	1.43e-12	-1.65	6.03e-11	2.34
Bean1	3.21664	14.0618	201.9	3.17e-41	-5.59	9.86e-32	3.82
Sel1l3	20.6994	26.8067	201.572	0.00352	-2.71	0.109	2.25
Arhgef16	16.6749	10.1226	195.261	1.61e-28	-3.42	3.21e-27	4.25
Dnajb3	82.9384	36.7696	191.768	2.22e-08	-1.18	1.11e-17	2.38
Bnc1	7.5762	3.73226	191.464	2.58e-08	-4.15	2.02e-21	5.46
Gsto2	69.3892	19.1826	187.675	9.89e-06	-1.38	1.08e-11	3.23
Atg9b	26.1078	76.4706	184.064	2.81e-16	-2.72	0.000504	1.28
Ptpn7	4.60202	21.62	181.683	8.22e-38	-5.1	1.85e-10	3.04
Magee2	23.2174	10.7672	178.998	4.42e-23	-2.88	3.25e-25	3.99
Serinc2	15.122	10.0777	177.192	1.03e-23	-3.42	0.00127	3.54
Iqca	1.67925	0	165.741	1.05e-31	-5.93	9.79e-16	8.38
Catsperb	17.1818	28.0408	162.472	1.46e-16	-3.13	4.85e-08	2.5
Fbxl21	70.5644	28.0853	154.251	3.1e-06	-1.1	1.6e-15	2.46
Apobec2	27.3232	22.2891	150.294	8.66e-15	-2.44	5.86e-16	2.74
Kbtbd10	11.4566	13.6567	149.33	4.07e-21	-3.51	1.71e-17	3.39
Ppil6	53.3099	15.6985	148.177	1.05e-07	-1.42	8.26e-12	3.2
Iqcd	31.5753	7.75757	145.127	7.01e-14	-2.14	2.08e-20	4.17
Lgr5	11.161	9.93445	142.109	1.1e-24	-3.54	9.41e-22	3.81
Fam69b	100.716	25.7241	139.618	0.0837	-0.446	4.55e-14	2.44
Fam71a	6.08234	23.3885	137.562	0.00019	-3.59	1.61e-07	2.53
Lrrc10b	49.6544	9.63103	105.107	0.000273	-1.07	3.17e-12	3.39
Scml2	50.8308	9.933	104.547	0.000219	-1.03	1.15e-16	3.35
Frmd7	14.8436	36.524	103.614	6.32e-08	-2.6	0.00164	1.5
Car10	0.279371	0	101.164	1.65e-18	-6.93	1.07e-12	7.73
Ccno	8.12397	13.9394	99.3746	3.01e-11	-3.3	1.08e-09	2.8
Pdcd1	4.78757	3.31118	94.6779	1.19e-18	-4.13	7.67e-16	4.71
N28178	16.8647	11.2124	85.3981	6.94e-09	-2.28	6.38e-08	2.84
Gldc	6.17805	8.1692	81.4138	7.35e-12	-3.46	1.5e-08	3.22
Fbxo27	14.0883	10.8343	77.5833	4.74e-07	-2.39	3.96e-07	2.79
Tpte	10.6498	7.1039	76.1062	5e-12	-2.77	1.53e-10	3.33
Rbfox3	11.0603	56.6654	70.9134	6.3e-08	-2.55	0.531	0.332
Ptgfr	16.1711	8.12054	63.1834	4.91e-05	-1.92	3.06e-05	2.85
Rbp2	0.313552	3.00395	59.6012	3.43e-14	-6.23	7.8e-10	4.07
Pkib	5.77846	10.1778	59.0489	7.7e-12	-3.18	0.000345	2.42
Thsd7b	3.47778	3.37401	56.8099	5.25e-08	-3.76	5.66e-10	3.89
Rdh16	6.99833	10.8102	54.7546	1.52e-06	-2.73	0.000133	2.28
Lrrn4	1.39988	1.06766	51.6675	4.06e-10	-4.37	5.54e-09	5.13
Micalcl	11.4701	6.0377	50.662	1.07e-06	-2.07	8.08e-08	2.99
Csrnp3	0.155189	0	50.272	1.25e-12	-6.01	3.09e-09	6.82
Nek5	33.03	7.74431	47.1076	0.336	-0.464	1.78e-05	2.52
Dusp14	20.7831	4.14915	46.8546	0.0194	-1.09	3.03e-05	3.31
Tmem151a	1.71041	5.56888	41.448	8.7e-07	-4	0.000738	2.72
Tmeff1	5.1741	7.52933	41.2793	3.38e-07	-2.86	0.0054	2.32
Bdh1	3.11595	4.20725	40.7897	1.63e-09	-3.5	2.82e-06	3.15
Zmat4	0.279371	0	39.2405	6.68e-11	-5.64	3.35e-08	6.51
Creb3l3	18.4788	5.50223	37.7953	0.0232	-1	1.53e-05	2.71
Mogat2	0	2.07431	35.0983	2.47e-09	-5.89	0.000276	3.58
Rgs8	0.92045	0	34.651	1.57e-09	-4.68	1.18e-07	6.33
C2cd4b	3.47898	1.36398	32.789	7.02e-07	-2.95	7.21e-07	4.24
Calcb	0	0	32.5461	1.46e-09	-5.9	2.42e-07	6.23
Zfp811	18.2576	5.90441	31.3946	0.102	-0.76	0.000407	2.32
Lrtm1	19.5508	3.73607	31.1135	0.307	-0.63	0.000581	2.88
Fam189a1	1.88894	3.49076	29.9134	1.2e-07	-3.57	2.02e-05	2.96
Apol7d	17.8689	3.4993	29.0544	0.299	-0.663	0.00627	2.76
Ckm	1.84142	5.02724	28.912	5.88e-06	-3.33	0.000488	2.42
Dhrs2	4.09147	0.592659	27.4969	0.000431	-2.52	2.18e-06	4.71
Mc4r	6.0263	0.355885	26.2467	0.0202	-1.91	2.23e-06	5.13
Srrm4	0.465567	3.84428	25.7978	3.1e-06	-4.26	0.00369	2.53
Zfp536	0.634092	0	24.2008	1.69e-07	-4.5	2.47e-06	5.85
Rnf208	12.3664	3.73371	24.0613	0.108	-0.912	0.00397	2.52
2017-09-05	16.6914	3.61315	23.8303	0.451	-0.454	0.00662	2.47
Hal	3.2858	9.04256	23.1248	0.0001	-2.58	0.0954	1.29
Igf2as	1.57475	2.5493	21	0.000135	-3.29	0.00284	2.78
Dio2	0.900128	7.97072	20.6719	1.93e-05	-3.58	0.173	1.28
Sobp	5.64268	2.5493	20.5481	0.0351	-1.63	0.00309	2.74
Rdh18-ps	0.558743	4.01677	20.2454	2.55e-06	-4.23	0.00459	2.2
Rpp25	1.5102	0.948544	19.3254	0.000223	-3.13	0.000475	3.72
Nacad	2.68139	4.48323	18.9579	0.00125	-2.53	0.0338	1.9
Pcnxl2	1.09267	2.60413	18.2261	5.02e-05	-3.37	0.0023	2.62
Speer4d	0.468741	0.652215	17.0434	9.65e-06	-4.06	0.000152	4.02
Acot6	4.69663	1.89236	15.7435	0.0658	-1.54	0.0024	2.79
Rpl3l	2.09296	1.60076	15.5812	0.00106	-2.52	0.00298	2.94
Ccdc160	0.279371	4.01677	15.3908	1.9e-05	-4.25	0.041	1.79
Ccdc154	2.78287	2.12441	15.2234	0.0144	-2.11	0.00984	2.53
Tmprss7	2.00677	2.70762	14.8249	0.00868	-2.33	0.0709	2.09
Golga7b	0.313552	0	14.6985	0.000266	-3.91	0.000419	4.87
Mef2b	2.28868	2.71471	14.6765	0.00377	-2.41	0.0189	2.21
Scrn1	3.59168	1.66031	14.0999	0.0243	-1.77	0.00922	2.74
Speer4a	2.0791	0	13.8256	0.0141	-2.32	0.000156	5.05
Gdpd4	5.1032	1.2997	13.8167	0.095	-1.26	0.00375	3.01
B4galnt4	0.279371	0.293967	13.015	6.91e-05	-4.04	0.000586	4.17
Il22ra1	0.465567	0	12.9993	0.000526	-3.41	0.000212	4.98
Wdr65	4.19541	1.76616	12.9188	0.0587	-1.46	0.0221	2.48
Ppm1n	1.03447	1.24251	12.7564	0.000856	-3.02	0.00434	2.94
Mogat1	3.05394	0.293967	12.6844	0.0485	-1.81	0.000983	4.08
Efhc2	0.7551	1.18532	12.3757	0.000726	-3.24	0.0217	2.78
Ptprq	0	1.18532	11.4918	6.86e-05	-4.43	0.0317	2.66
Pdzrn4	1.69957	0	10.9101	0.0218	-2.2	0.00117	4.57
Ppp1r36	6.71466	0.8819	10.0521	0.53	-0.557	0.0214	2.83
Accn1	3.90005	0.592659	9.88805	0.429	-0.95	0.0172	3.1
Ppp1r3a	0.934308	1.2997	9.83204	0.0137	-2.53	0.0374	2.49
Acsbg1	0.475729	3.60515	9.45307	0.00323	-3.13	0.351	1.21
Tm4sf5	2.79673	0	9.37801	0.188	-1.37	0.0022	4.38
Amdhd1	0.903302	2.30544	9.08935	0.00929	-2.58	0.157	1.71
Fam69c	1.09966	0.946181	9.05627	0.015	-2.38	0.0188	2.74
Zcchc5	0.630918	1.77798	8.73154	0.0144	-2.68	0.227	1.76
Fitm1	0.7551	0.590296	8.63867	0.00688	-2.75	0.0141	3.06
Coro6	0.592923	5.44595	8.61071	0.00477	-2.97	0.626	0.595
Ces1c	0	0	8.48309	0.000472	-4.03	0.00224	4.36
Uroc1	0	0	8.28597	0.000733	-3.93	0.0031	4.27
Ccdc135	0.155189	1.5412	7.80901	0.00229	-3.4	0.123	1.95
Ppp1r3g	0.558743	0	7.78273	0.0112	-2.79	0.00291	4.27
St8sia5	0.310378	0	7.5924	0.0104	-2.9	0.00446	4.15
Rimklb	0.155189	0	6.85685	0.00487	-3.21	0.00523	4.08
Arid3c	0.155189	1.23779	6.82889	0.00931	-3.07	0.171	1.92
Pah	0.155189	0.296329	6.72756	0.00608	-3.16	0.0226	3.17
Trap1a	1.26818	0.293967	6.59994	0.087	-1.91	0.0224	3.17
Asb11	0	1.83753	5.744	0.00355	-3.51	0.346	1.33
Lrrc66	0	1.18295	5.6215	0.0078	-3.29	0.254	1.69
Ttll2	0.279371	0	5.53798	0.0273	-2.68	0.0171	3.65
Hao1	0.313552	0.592659	5.42094	0.0229	-2.72	0.112	2.32
Neu4	0.869121	0	5.2128	0.124	-1.81	0.0173	3.64
Insl5	0	0	4.99655	0.0281	-2.81	0.0587	3.07
Sult4a1	0.155189	0	4.84441	0.0328	-2.64	0.0261	3.46
Hist1h4a	0.313552	2.70762	4.74986	0.0405	-2.51	0.692	0.641
Eddm3b	0	0	4.74307	0.00909	-3.22	0.0214	3.54
Clrn3	0.155189	0	4.55442	0.0346	-2.61	0.0271	3.44
Tmem211	0	1.30207	4.45308	0.0117	-3.14	0.299	1.47
Bhmt	1.4094	0	4.28013	0.381	-1.14	0.0331	3.35
Lemd1	0	0	4.17368	0.0433	-2.61	0.0828	2.86
Nkx6-2	0	0.587934	3.96386	0.0171	-3	0.219	1.92
Elovl3	0	0	3.77521	0.0213	-2.92	0.0418	3.23
Lcn13	0	0.296329	3.71586	0.0234	-2.88	0.136	2.35
Klhl30	0	3.3731	3.18465	0.0395	-2.65	0.992	-0.0187
Ly6g6f	0	0.592659	3.141	0.0397	-2.65	0.341	1.59
